# Supplementary material for: Complex Modulation of the Aedes aegypti Transcriptome in Response to Dengue Virus Infection
Source: PLoS One. 2012 Nov 27;7(11):e50512. doi: 10.1371/journal.pone.0050512 (PMC3507784; doi:10.1371/journal.pone.0050512)
Supplement: Table S3 — List of genes detected as significantly differentially accumulated by DESeq and Cufflinks. Genes encoding for polyadenylated RNAs found differentially accumulated in carcass, midgut and salivary gland samples at 1, 4 and 14dpi are listed with their accumulation levels in B (FPKMB) and DENVI (FPKMDENVI) mosquitoes. Genes with transcripts consistently differentially accumulated in previous studies are marked. (XLSX) [file pone.0050512.s008.xlsx]

## Sheet: 1dpi
Table S3. List of genes detected as significantly differentially accumulated (DA) by DESeq (Anders and Hubert, 2010) and Cufflinks (Trapnell et al., 2010). Gene Accumulation levels are shown in the tissues where each gene was found DA.
TISSUE	TIME	ENSEMBL GENE ID	LOCUS	STATUS	FPKM_B	FPKM_DENVI	ln(fold_change)	test_stat	p_value	q_value	ImmunoDB	BIOMART DESCRIPTION	GO TERM NAME (bp)	Functional Category
carcasses	1dpi	AAEL003843	supercont1.98:1442084-1442583	OK	54.7706	1.55088	-3.56433	11.5176	0	0		hypothetical protein		unknown
carcasses	1dpi	AAEL001392	supercont1.31:594746-596140	OK	280.612	57.9871	-1.57675	7.06461	1.61071e-12	2.25306e-09		hypothetical protein		unknown
carcasses	1dpi	AAEL000321***	supercont1.6:1032704-1064959	OK	54.9867	9.99051	-1.70546	7.92433	2.22045e-15	5.1766e-12		acetyl-coa synthetase [Source:VB External Description;Acc:AAEL000321]	metabolic process	metabolism
carcasses	1dpi	AAEL017536	supercont1.31:652166-652602	OK	1777.11	509.132	-1.25004	5.81869	5.93117e-09	4.60918e-06		Holotricin, Glycine Rich Repreat Protein (GRRP), Anti-Microbial Peptide.		immunity
carcasses	1dpi	AAEL001194	supercont1.24:871320-894774	OK	431.103	79.409	-1.69174	4.93834	7.87919e-07	0.000268815		fatty acid synthase [Source:VB External Description;Acc:AAEL001194]	metabolic process	metabolism
carcasses	1dpi	AAEL004472 (AAEL004453)*	supercont1.120:786072-817266	OK	202.834	115.508	-0.563052	3.56635	0.000361988	0.0244613		hypothetical protein [Source:VB External Description;Acc:AAEL004472]	nucleic acid binding, ATP binding, helicase activity	unknown
carcasses	1dpi	AAEL003881	supercont1.99:645951-646429	OK	16.9958	1.69097	-2.30766	7.57975	3.4639e-14	6.92185e-11		ubiquitin, putative		unknown
carcasses	1dpi	AAEL003841**	supercont1.98:1444535-1444896	OK	220.581	33.2338	-1.89269	8.06324	6.66134e-16	1.86358e-12	DEFA	Defensin-A Precursor (AaDef) [Source:VB External Description;Acc:AAEL003841]	innate immune response	immunity
carcasses	1dpi	AAEL005790	supercont1.174:1001994-1032638	OK	363.179	86.12	-1.43915	6.21472	5.14151e-10	5.53226e-07		malic enzyme [Source:VB External Description;Acc:AAEL005790]	malate metabolic process	metabolism
carcasses	1dpi	AAEL003832**	supercont1.98:1385922-1386299	OK	32.6693	4.16046	-2.06081	7.2303	4.81837e-13	7.48881e-10	DEFC	Defensin-C Precursor [Source:VB External Description;Acc:AAEL003832]		immunity
TISSUE	TIME	ENSEMBL GENE ID	LOCUS	STATUS	FPKM_B	FPKM_DENVI	ln(fold_change)	test_stat	p_value	q_value	ImmunoDB	BIOMART DESCRIPTION	GO TERM NAME (bp)	Functional Category
midgut	1dpi	AAEL001287	supercont1.29:2903551-2925656	OK	3.53265	0	-1.79769e+308	-1.79769e+308	1.80665e-05	0.00113892		conserved hypothetical protein		unknown
midgut	1dpi	AAEL001503***	supercont1.34:2622826-2864718	OK	7.56287	66.2054	2.16951	-5.85567	4.75095e-09	1.39228e-06		sodium/hydrogen exchanger 3 (nhe3) [Source:VB External Description;Acc:AAEL001503]	transport	transport
midgut	1dpi	AAEL002194***	supercont1.51:689564-708889	OK	16.2479	1.68821	-2.26429	6.37792	1.79508e-10	8.46263e-08		uricase [Source:VB External Description;Acc:AAEL002194]	purine base metabolic process	metabolism
midgut	1dpi	AAEL002796	supercont1.68:2310400-2312778	OK	5.5458	0.263998	-3.04485	7.30573	2.75779e-13	2.71843e-10		l-asparaginase i [Source:VB External Description;Acc:AAEL002796]	cellular amino acid metabolic process	metabolism
midgut	1dpi	AAEL003290	supercont1.83:570998-572256	OK	2.64122	0	-1.79769e+308	-1.79769e+308	0.000285654	0.0092735		cell wall protein DAN4 precursor, putative		cytoskeleton, cell wall, cell motility and extracellular structures
midgut	1dpi	AAEL003609	supercont1.92:2558921-2562680	OK	0.557466	5.13194	2.21984	-5.86562	4.47463e-09	1.34773e-06		neurobeachin [Source:VB External Description;Acc:AAEL003609]	binding	unknown
midgut	1dpi	AAEL003733	supercont1.95:1346986-1393621	OK	0.654456	5.18005	2.06877	-5.59102	2.25744e-08	4.7072e-06		hypothetical protein [Source:VB External Description;Acc:AAEL003733]	ubiquitin-dependent protein catabolic process	Posttranslational modification, protein turnover, chaperones
midgut	1dpi	AAEL004181	supercont1.109:1198588-1207336	OK	0.142683	2.08219	2.68055	-6.59897	4.14029e-11	2.13777e-08		conserved hypothetical protein		unknown
midgut	1dpi	AAEL005091	supercont1.141:1937769-1939789	OK	0.594964	7.88913	2.58474	-6.13584	8.47082e-10	2.96287e-07		conserved hypothetical protein		unknown
midgut	1dpi	AAEL006126	supercont1.191:31512-47259	OK	38.1415	5.07332	-2.01731	5.78354	7.31446e-09	2.03361e-06		conserved hypothetical protein [Source:VB External Description;Acc:AAEL006126]	lipid transport	transport
midgut	1dpi	AAEL006138	supercont1.191:160678-167375	OK	75.4308	12.6868	-1.78266	4.62338	3.77541e-06	0.000324895		hypothetical protein [Source:VB External Description;Acc:AAEL006138]	lipid transport	transport
midgut	1dpi	AAEL006259	supercont1.197:948068-949187	OK	14.2348	1.65455	-2.15216	5.54977	2.86043e-08	5.85202e-06		GPCR (Rhod)opsin Family [Source:VB External Description;Acc:AAEL006259]	signal transduction	signal transduction
midgut	1dpi	AAEL006563	supercont1.210:1324312-1325830	OK	53.3116	6.38554	-2.12212	6.16572	7.01641e-10	2.53596e-07		Vitellogenic carboxypeptidase Precursor (EC 3.4.16.-) [Source:VB External Description;Acc:AAEL006563]	proteolysis	proteolysis
midgut	1dpi	AAEL006911***	supercont1.227:517394-553326	OK	0.448346	6.44764	2.6659	-6.72935	1.70424e-11	1.02661e-08		microtubule-associated protein		cytoskeleton, cell wall, cell motility and extracellular structures
midgut	1dpi	AAEL007817	supercont1.284:463405-508767	OK	0.112252	1.66757	2.69837	-6.24639	4.20051e-10	1.57056e-07		hypothetical protein		unknown
midgut	1dpi	AAEL008019	supercont1.295:485879-640638	OK	0.904514	17.8591	2.98287	-7.01533	2.29416e-12	1.77683e-09		hypothetical protein		unknown
midgut	1dpi	AAEL008046	supercont1.297:1372501-1386108	OK	8.94849	0.70911	-2.53523	6.31003	2.7899e-10	1.1635e-07		rh antigen [Source:VB External Description;Acc:AAEL008046]	transport, integral to membrane	transport
midgut	1dpi	AAEL008413	supercont1.323:1035509-1195252	OK	1.26585	11.5996	2.21523	-6.0924	1.11232e-09	3.44597e-07		serine/threonine protein kinase [Source:VB External Description;Acc:AAEL008413]	protein phosphorylation	unknown
midgut	1dpi	AAEL008845	supercont1.352:358725-397909	OK	0.179442	4.13006	3.13619	-7.68434	1.53211e-14	1.66126e-11		conserved hypothetical protein		unknown
midgut	1dpi	AAEL009076	supercont1.368:182964-183204	OK	62.1561	340.264	1.70007	-4.82653	1.38929e-06	0.000136946		NADH-ubiquinone oxidoreductase chain 4 (EC 1.6.5.3)(NADH dehydrogenase subunit 4) [Source:VB External Description;Acc:AAEL009076]	ATP synthesis coupled electron transport, NADH dehydrogenase (ubiquinone) activity	oxidoreductase activity
midgut	1dpi	AAEL009161	supercont1.373:732360-736101	OK	0.706408	7.41466	2.35102	-6.10948	9.99555e-10	3.2843e-07		breast carcinoma amplified sequence [Source:VB External Description;Acc:AAEL009161]	protein binding	unknown
midgut	1dpi	AAEL009630	supercont1.413:342529-439593	OK	0.327809	6.20547	2.94076	-7.26727	3.66818e-13	3.3145e-10		high-affinity cgmp-specific 3,5-cyclic phosphodiesterase [Source:VB External Description;Acc:AAEL009630]	signal transduction, catalytic activity	signal transduction
midgut	1dpi	AAEL009888	supercont1.436:633582-669992	OK	1.07918	0	-1.79769e+308	-1.79769e+308	0.000160858	0.00609854		bumetanide-sensitive Na-K-Cl cotransport protein, putative [Source:VB External Description;Acc:AAEL009888]	sodium ion transport	transport
midgut	1dpi	AAEL010434	supercont1.477:206260-212970	OK	28.6494	4.76584	-1.79366	5.18087	2.20853e-07	3.03128e-05		Vitellogenin-A1 Precursor (VG)(PVG1) [Contains Vitellin light chain(VL);Vitellin heavy chain(VH)] [Source:VB External Description;Acc:AAEL010434]	lipid transport	transport
midgut	1dpi	AAEL011900	supercont1.628:386415-406240	OK	0.166231	4.09288	3.20363	-6.26319	3.77187e-10	1.46065e-07		N-acetyllactosaminide beta-1,3-N-acetylglucosaminyltransferase, putative [Source:VB External Description;Acc:AAEL011900]	transferase activity, transferring glycosyl groups, electron carrier activity	energy production and conversion
midgut	1dpi	AAEL012506	supercont1.704:244310-246357	OK	1.52599	10.7417	1.95149	-4.89903	9.63128e-07	0.000100415		conserved hypothetical protein		unknown
midgut	1dpi	AAEL017110	supercont1.83:541538-542056	OK	11.4439	0	-1.79769e+308	-1.79769e+308	7.28137e-05	0.0034031		novel protein coding		unknown
midgut	1dpi	AAEL017211	supercont1.110:1117373-1118178	OK	447.164	52.2916	-2.14609	6.26892	3.63566e-10	1.46005e-07		Cecropin, Anti-Microbial Peptide. [Source:VB External Description;Acc:AAEL017211]	extracellular region	immunity
midgut	1dpi	AAEL017241	supercont1.227:575177-576450	OK	1.39456	12.8624	2.22173	-5.534	3.13016e-08	6.28525e-06		Novel protein coding		unknown
midgut	1dpi	AAEL017356	supercont1.39:2434181-2457280	OK	16.2794	0	-1.79769e+308	-1.79769e+308	7.49713e-05	0.00345921		Novel protein coding		unknown
*Reads coverage did not allow distinguishing between AAEL004453 and AAEL004472
**previously dedetcted as differentially expressed (Xi et al., 2008)
***previously detected as differentially expressed in mosquitoes of the MOYO-S or MOYO-R strains infected with DENV2 Jam1409 18hpost infection (Behura et al., 2011)

## Sheet: 4dpi
TISSUE	TIME	ENSEMBL GENE ID	LOCUS	STATUS	FPKM_B	FPKM_DENVI	ln(fold_change)	test_stat	p_value	q_value	ImmunoDB	BIOMART DESCRIPTION	GO TERM NAME (bp)	Functional Category
carcasses	4dpi	AAEL007653***	supercont1.271:957702-982280	OK	31.9163	81.4138	0.936428	-4.46442	8.02858e-06	0.00140361		allantoinase [Source:VB External Description;Acc:AAEL007653]	allantoin catabolic process	metabolism
carcasses	4dpi	AAEL003389	supercont1.85:2699726-2700586	OK	33.8278	0.841915	-3.69336	10.537	0	0	ATT	Attacin,Anti-Microbial Peptide. [Source:VB External Description;Acc:AAEL003389]	extracellular region	immunity
carcasses	4dpi	AAEL007898	supercont1.288:811867-881217	OK	21.1555	9.65812	-0.784102	3.90247	9.5215e-05	0.0107867		calmin [Source:VB External Description;Acc:AAEL007898]	proteolysis, acting binding	cytoskeleton, cell wall, cell motility and extracellular structures
carcasses	4dpi	AAEL007599	supercont1.265:1279703-1280845	OK	0.17838	2.6928	2.71442	-5.67294	1.40368e-08	5.52154e-06		cathepsin b [Source:VB External Description;Acc:AAEL007599]	proteolysis	immunity
carcasses	4dpi	AAEL000611	supercont1.12:758894-759144	OK	694.192	3.30458	-5.34744	15.1348	0	0	CECE	Cecropin, Anti-Microbial Peptide. [Source:VB External Description;Acc:AAEL000611]	innate immune response	immunity
carcasses	4dpi	AAEL000598	supercont1.12:767341-767585	OK	161.459	0.477054	-5.82438	10.9971	0	0	CECD	Cecropin,Anti-Microbial Peptide. [Source:VB External Description;Acc:AAEL000598]	innate immune response	immunity
carcasses	4dpi	AAEL000621	supercont1.12:748023-748291	OK	295.213	2.53311	-4.75825	12.9246	0	0	CECN	Cecropin,Anti-Microbial Peptide. [Source:VB External Description;Acc:AAEL000621]	innate immune response	immunity
carcasses	4dpi	AAEL000625	supercont1.12:780655-780906	OK	467.036	3.56533	-4.87515	13.8534	0	0	CECF	Cecropin,Anti-Microbial Peptide. [Source:VB External Description;Acc:AAEL000625]	innate immune response	immunity
carcasses	4dpi	AAEL015515**	supercont1.2850:4343-4596	OK	313.589	0.270333	-7.05618	9.7334	0	0	CECG	Cecropin,Anti-Microbial Peptide. [Source:VB External Description;Acc:AAEL015515]	innate immune response	immunity
carcasses	4dpi	AAEL000627	supercont1.12:755810-756064	OK	90.6856	0.147714	-6.41987	6.30498	2.8823e-10	1.51171e-07	CECA	Cecropin-A Precursor [Source:VB External Description;Acc:AAEL000627]	innate immune response	immunity
carcasses	4dpi	AAEL005431	supercont1.156:1980623-1981900	OK	34.588	6.91355	-1.61002	6.05934	1.36681e-09	6.24369e-07	CLIPB37	Clip-domain serine protease, family B. [Source:VB External Description;Acc:AAEL005431]	proteolysis	immunity
carcasses	4dpi	AAEL003728	supercont1.95:2048762-2071010	OK	5.95248	1.05394	-1.73128	5.43907	5.35606e-08	1.89618e-05		conserved hypothetical protein [Source:VB External Description;Acc:AAEL003728]	protein binding	unknown
carcasses	4dpi	AAEL004503	supercont1.121:1730620-1731369	OK	1548.93	703.426	-0.789355	3.95939	7.514e-05	0.00886714		conserved hypothetical protein [Source:VB External Description;Acc:AAEL004503]	structural constituent of ribosome, translation	transcription and translation
carcasses	4dpi	AAEL006106	supercont1.189:2063846-2065664	OK	2.15632	0.285696	-2.02123	4.52909	5.92373e-06	0.00114912		conserved hypothetical protein [Source:VB External Description;Acc:AAEL006106]	transport, odorand binding protein	diverse
carcasses	4dpi	AAEL014561	supercont1.1166:69079-69674	OK	0.039898	2.88093	4.27954	-4.13852	3.4956e-05	0.0049011		conserved hypothetical protein [Source:VB External Description;Acc:AAEL014561]	biological_process, extracellular region	unknown
carcasses	4dpi	AAEL011610	supercont1.594:24298-319047	OK	39.3032	8.04556	-1.58619	5.29883	1.16548e-07	3.751e-05		CTLGA7	C-Type lectin (CTL) - galactose binding. [Source:VB External Description;Acc:AAEL011610]	immunity
carcasses	4dpi	AAEL005641***	supercont1.167:85696-86248	OK	83.6697	6.45098	-2.56264	8.67641	0	0	CTLGA5	C-Type lectin (CTL) - galactose binding. [Source:VB External Description;Acc:AAEL005641]	binding	immunity
carcasses	4dpi	AAEL003723	supercont1.95:52694-94946	OK	108.8	12.1648	-2.19096	8.13575	4.44089e-16	3.49375e-13	LYSC11	C-Type lysozyme (Lys-A), Lyzosyme activity	cell wall macromolecule catabolic process	immunity
carcasses	4dpi	AAEL008473	supercont1.328:1045982-1047874	OK	177.339	47.3207	-1.32111	6.15316	7.59535e-10	3.70889e-07		cysteine-rich venom protein, putative [Source:VB External Description;Acc:AAEL008473]	extracellular region	unknown
carcasses	4dpi	AAEL009018***	supercont1.362:639589-641207	OK	129.863	308.919	0.866598	-4.331	1.48433e-05	0.00236176		cytochrome P450 [Source:VB External Description;Acc:AAEL009018]	oxidation-reduction process	oxidoreductase activity
carcasses	4dpi	AAEL003857**	supercont1.98:1405525-1405886	OK	711.772	16.5998	-3.75837	14.3522	0	0	DEFD	Defensin,Anti-Microbial Peptide. [Source:VB External Description;Acc:AAEL003857]	defense response	immunity
carcasses	4dpi	AAEL003841**	supercont1.98:1444535-1444896	OK	854.999	19.6783	-3.77158	14.6174	0	0	DEFA	Defensin-A Precursor (AaDef) [Source:VB External Description;Acc:AAEL003841]	innate immune response	immunity
carcasses	4dpi	AAEL003832**	supercont1.98:1385922-1386299	OK	258.297	4.22918	-4.1121	12.9791	0	0	DEFC	Defensin-C Precursor [Source:VB External Description;Acc:AAEL003832]	innate immune response	immunity
carcasses	4dpi	AAEL006704**/***	supercont1.217:211370-212726	OK	208.121	46.9602	-1.48882	6.89836	5.26068e-12	3.54745e-09	FREP18	fibrinogen and fibronectin [Source:VB External Description;Acc:AAEL006704]	signal transduction	immunity
carcasses	4dpi	AAEL006138***	supercont1.191:160678-167375	OK	0.207093	6.36526	3.42544	-10.3826	0	0		hypothetical protein [Source:VB External Description;Acc:AAEL006138]	lipid transport	transport
carcasses	4dpi	AAEL008050	supercont1.298:168869-170295	OK	14.0591	3.43098	-1.41042	4.75565	1.97811e-06	0.000474779		hypothetical protein [Source:VB External Description;Acc:AAEL008050]	negative regulation of translation, rRNA N-glycosylase activity	transcription and translation
carcasses	4dpi	AAEL012505	supercont1.704:238623-243813	OK	9.201	2.46661	-1.31647	5.15155	2.58348e-07	7.46626e-05		hypothetical protein [Source:VB External Description;Acc:AAEL012505]	protein import, nucleic acid and protein binding, helicase activity	unknown
carcasses	4dpi	AAEL005752	supercont1.173:970774-974119	OK	16.1582	51.3938	1.15709	-5.40305	6.55166e-08	2.26288e-05		lysosomal alpha-mannosidase (mannosidase alpha class 2b member 1) [Source:VB External Description;Acc:AAEL005752]	carbohydrate metabolic process	metabolism
carcasses	4dpi	AAEL009219****	supercont1.381:663645-670692	OK	32.1742	7.00251	-1.5249	6.69285	2.18863e-11	1.34753e-08		predicted protein [Source:VB External Description;Acc:AAEL009219]	chitin metabolic process	metabolism
carcasses	4dpi	AAEL004758	supercont1.129:423862-424869	OK	4.58601	0.476865	-2.26353	5.20384	1.95208e-07	6.00944e-05		pupal cuticle protein, putative [Source:VB External Description;Acc:AAEL004758]	structural constituent of cuticle	cytoskeleton, cell wall, cell motility and extracellular structures
carcasses	4dpi	AAEL010139***	supercont1.456:51589-67346	OK	99.1204	26.6109	-1.31501	5.55909	2.7119e-08	1.01061e-05		serine protease, putative [Source:VB External Description;Acc:AAEL010139]	peptidase activity	proteolysis
carcasses	4dpi	AAEL005324	supercont1.151:525191-569558	OK	19.1882	6.26385	-1.1195	5.56274	2.65566e-08	1.0164e-05		titin [Source:VB External Description;Acc:AAEL005324]	protein binding	cytoskeleton, cell wall, cell motility and extracellular structures
carcasses	4dpi	AAEL013714*	supercont1.901:242510-243088	OK	0.137744	3.11628	3.119	-5.13918	2.75941e-07	7.81519e-05		trypsin, putative [Source:VB External Description;Acc:AAEL013714]	proteolysis	proteolysis
carcasses	4dpi	AAEL013629	supercont1.887:255441-256845	OK	13.5785	3.3758	-1.39185	4.7348	2.19268e-06	0.000509025		trypsin-alpha, putative [Source:VB External Description;Acc:AAEL013629]	proteolysis	proteolysis
carcasses	4dpi	AAEL000374	supercont1.6:542237-543154	OK	11.9857	2.53768	-1.55246	4.44115	8.94801e-06	0.00154528		cysteine-rich venom protein, putative [Source:VB External		unknown
carcasses	4dpi	AAEL000566	supercont1.11:3870101-3871509	OK	20.3623	4.08506	-1.60635	5.104	3.32545e-07	9.23367e-05		conserved hypothetical protein		unknown
carcasses	4dpi	AAEL001392	supercont1.31:594746-596140	OK	91.0929	2.95225	-3.42931	10.4286	0	0		hypothetical protein		unknown
carcasses	4dpi	AAEL003050	supercont1.76:2024906-2025621	OK	30.5685	3.83585	-2.07558	6.58472	4.55744e-11	2.68908e-08		hypothetical protein		unknown
carcasses	4dpi	AAEL003816	supercont1.98:1459254-1459732	OK	135.044	4.13066	-3.48716	11.5329	0	0		hypothetical protein		unknown
carcasses	4dpi	AAEL003821	supercont1.98:1414682-1415176	OK	26.0506	2.11698	-2.51005	6.80386	1.01856e-11	6.5563e-09		hypothetical protein		unknown
carcasses	4dpi	AAEL003843	supercont1.98:1442084-1442583	OK	60.5116	0.565257	-4.67331	10.5274	0	0		hypothetical protein		unknown
carcasses	4dpi	AAEL004197	supercont1.109:1923347-1923938	OK	345.904	70.73	-1.58729	6.3781	1.793e-10	9.76563e-08		hypothetical protein		unknown
carcasses	4dpi	AAEL004481	supercont1.120:644370-646033	OK	50.1687	9.96613	-1.6162	5.8443	5.08703e-09	2.25117e-06		hypothetical protein		unknown
carcasses	4dpi	AAEL004522**	supercont1.122:2186815-2188508	OK	221.09	41.8537	-1.66439	6.38263	1.74067e-10	9.85986e-08		Gambicin,Anti-Microbial Peptide		immunity
carcasses	4dpi	AAEL006971	supercont1.230:597785-599062	OK	26.6967	6.27241	-1.44838	5.31494	1.06692e-07	3.51365e-05		conserved hypothetical protein		unknown
carcasses	4dpi	AAEL007703	supercont1.275:1333378-1403740	OK	97.4203	35.6926	-1.00409	5.33238	9.69353e-08	3.26833e-05		conserved hypothetical protein		unknown
carcasses	4dpi	AAEL007769	supercont1.279:1499942-1500743	OK	3.61225	0.176862	-3.01672	6.10544	1.02515e-09	4.83907e-07		hypothetical protein		unknown
carcasses	4dpi	AAEL008775	supercont1.348:1088454-1089543	OK	71.8756	32.599	-0.790655	3.38923	0.000700889	0.0477177		hypothetical protein		unknown
carcasses	4dpi	AAEL012017	supercont1.644:239457-239613	OK	14.1406	1.61255	-2.17123	4.17163	3.02429e-05	0.0045081		hypothetical protein		unknown
carcasses	4dpi	AAEL013523	supercont1.863:8520-8862	OK	0.198837	7.54942	3.63674	-5.8189	5.92351e-09	2.5419e-06		hypothetical protein		unknown
carcasses	4dpi	AAEL017231	supercont1.556:24408-24567	OK	2201.69	484.529	-1.5138	7.21717	5.30909e-13	3.95695e-10		Novel protein coding		unknown
carcasses	4dpi	AAEL017247	supercont1.159:1673805-1785119	OK	645.725	240.567	-0.987377	4.48973	7.13141e-06	0.0013465		Novel protein coding		unknown
carcasses	4dpi	AAEL017284	supercont1.111:1881850-1882942	OK	19.9161	6.80091	-1.07447	3.70259	0.00021341	0.0206993		Novel protein coding		unknown
carcasses	4dpi	AAEL017380	supercont1.301:684783-685342	OK	176.609	754.838	1.45256	-7.05563	1.71818e-12	1.21656e-09		Novel protein coding		unknown
carcasses	4dpi	AAEL017514	supercont1.146:725669-726438	OK	31.94	6.08844	-1.65747	5.76765	8.03845e-09	3.34802e-06		Novel protein coding		unknown
carcasses	4dpi	AAEL017529	supercont1.34:1086413-1087682	OK	109.664	47.2156	-0.842701	3.79263	0.000149059	0.0157524		Novel protein coding		unknown
carcasses	4dpi	AAEL017536	supercont1.31:652166-652602	OK	293.003	827.264	1.03794	-4.92575	8.40369e-07	0.000220379		Holotricin, Glycine Rich Repreat Protein (GRRP), Anti-Microbial Peptide		immunity
TISSUE	TIME	ENSEMBL GENE ID	LOCUS	STATUS	FPKM_B	FPKM_DENVI	ln(fold_change)	test_stat	p_value	q_value	ImmunoDB	BIOMART DESCRIPTION	GO TERM NAME (bp)	Functional Category
midgut	4dpi	AAEL000079	supercont1.1:322041-391518	OK	0.134777	0.850284	1.84195	-6.94912	3.67573e-12	8.38801e-10		hypothetical protein [Source:VB External Description;Acc:AAEL000079]	protein binding	unknown
midgut	4dpi	AAEL000335	supercont1.6:3209272-3211399	OK	0.0253303	1.44713	4.04534	-3.97891	6.92325e-05	0.00318525		lamin [Source:VB External Description;Acc:AAEL000335]	structural molecule activity	cytoskeleton, cell wall, cell motility and extracellular structures
midgut	4dpi	AAEL000442	supercont1.8:895164-909058	OK	0.345306	5.57443	2.78151	-7.70816	1.26565e-14	4.01142e-12		conserved hypothetical protein [Source:VB External Description;Acc:AAEL000442]	hydrolase activity	unknown
midgut	4dpi	AAEL000604	supercont1.12:54704-68568	OK	11.7499	29.0464	0.905052	-6.78602	1.15272e-11	2.48162e-09		hypothetical protein		unknown
midgut	4dpi	AAEL000732	supercont1.15:1357686-1359891	OK	3.70013	0	-1.79769e+308	-1.79769e+308	3.02546e-12	7.04501e-10		conserved hypothetical protein [Source:VB External Description;Acc:AAEL000732]	cell outer membrane, defense response	unknown
midgut	4dpi	AAEL000748	supercont1.15:1337976-1339917	OK	1.10507	0	-1.79769e+308	-1.79769e+308	9.74634e-07	8.17689e-05		conserved hypothetical protein		unknown
midgut	4dpi	AAEL000793	supercont1.16:3232148-3233160	OK	20.2801	0.114546	-5.17641	7.24029	4.47642e-13	1.16082e-10		venom allergen [Source:VB External Description;Acc:AAEL000793]	extracellular region	unknown
midgut	4dpi	AAEL000859	supercont1.18:904216-913165	OK	153.151	65.5241	-0.849009	7.33175	2.27152e-13	6.64564e-11		hypothetical protein		unknown
midgut	4dpi	AAEL001054	supercont1.22:1422024-1422744	OK	3.90553	13.8338	1.26472	-5.59337	2.22704e-08	2.88756e-06		glutathionetransferase [Source:VB External Description;Acc:AAEL001054]	transferase activity	metabolism
midgut	4dpi	AAEL001077	supercont1.22:3157026-3159161	OK	16.9553	6.92118	-0.895994	6.06396	1.32807e-09	2.02043e-07	CLIPB45	Clip-domain serine protease, family B. Protease homologue. [Source:VB External Description;Acc:AAEL001077]	proteolysis	immunity
midgut	4dpi	AAEL001098	supercont1.22:3139445-3140576	OK	22.1514	6.93307	-1.1616	6.91889	4.55191e-12	1.01838e-09		clip-domain serine protease, putative [Source:VB External Description;Acc:AAEL001098]	proteolysis	immunity
midgut	4dpi	AAEL001673	supercont1.39:1691872-1695947	OK	210.197	117.53	-0.581351	5.09369	3.51159e-07	3.2842e-05		actin [Source:VB External Description;Acc:AAEL001673]	cytoskeleton	cytoskeleton, cell wall, cell motility and extracellular structures
midgut	4dpi	AAEL001702	supercont1.39:1446407-1451003	OK	10.0131	39.1449	1.36337	-7.80845	5.77316e-15	2.27144e-12		conserved hypothetical protein		unknown
midgut	4dpi	AAEL002023***	supercont1.47:1697346-1721526	OK	34.81	14.2427	-0.893663	6.69282	2.18916e-11	4.16305e-09		imaginal disc growth factor [Source:VB External Description;Acc:AAEL002023]	carbohydrate metabolic process	metabolism
midgut	4dpi	AAEL002124	supercont1.49:2638181-2660936	OK	6.05722	1.63376	-1.31037	5.45356	4.93724e-08	5.99297e-06	CLIPD6	Clip-domain serine protease, family D. [Source:VB External Description;Acc:AAEL002124]	proteolysis	immunity
midgut	4dpi	AAEL002347	supercont1.54:3075243-3076240	OK	22.8487	69.0063	1.1053	-7.78131	7.10543e-15	2.70243e-12		serine-type enodpeptidase, [Source:VB External Description;Acc:AAEL002347]	proteolysis	proteolysis
midgut	4dpi	AAEL002612	supercont1.61:532167-532798	OK	11.2702	1.00296	-2.41921	7.2408	4.46088e-13	1.18369e-10		hypothetical protein [Source:VB External Description;Acc:AAEL002612]	chitin metabolic process	cytoskeleton, cell wall, cell motility and extracellular structures
midgut	4dpi	AAEL002704***	supercont1.65:1197985-1199365	OK	7.87441	0.107288	-4.29586	5.96558	2.4376e-09	3.56577e-07	SRPN23	serine protease inhibitor (serpin) homologue - unlikely to be inhibitory. [Source:VB External Description;Acc:AAEL002704]	serine-type endopeptidase inhibitor activity	immunity
midgut	4dpi	AAEL002839	supercont1.69:1066701-1092241	OK	0.85232	4.13112	1.57834	-6.55166	5.68994e-11	9.98803e-09		kakapo [Source:VB External Description;Acc:AAEL002839]	protein binding	cytoskeleton, cell wall, cell motility and extracellular structures
midgut	4dpi	AAEL003053	supercont1.76:1230295-1231776	OK	7.09402	0.0775453	-4.51614	4.25859	2.05718e-05	0.001162		allergen, putative [Source:VB External Description;Acc:AAEL003053]	extracellular region	unknown
midgut	4dpi	AAEL003079	supercont1.76:521472-523069	OK	25.7067	81.6609	1.15582	-8.98568	0	0		glucosyl/glucuronosyl transferases [Source:VB External Description;Acc:AAEL003079]	metabolic process	metabolism
midgut	4dpi	AAEL003123	supercont1.78:1113180-1114614	OK	233.666	88.0581	-0.975898	8.39057	0	0		deoxyribonuclease I, putative [Source:VB External Description;Acc:AAEL003123]	nucleic acid binding, hydrolase activity	diverse
midgut	4dpi	AAEL003182	supercont1.81:289403-290790	OK	4.15416	0	-1.79769e+308	-1.79769e+308	8.53597e-10	1.33418e-07	SRPN26	serine protease inhibitor (serpin) homologue - unlikely to be inhibitory. [Source:VB External Description;Acc:AAEL003182]	serine-type endopeptidase inhibitor activity	immunity
midgut	4dpi	AAEL003286	supercont1.83:1258201-1260672	OK	177.492	65.4379	-0.997822	8.48773	0	0		alkaline phosphatase [Source:VB External Description;Acc:AAEL003286]	metabolic process	metabolism
midgut	4dpi	AAEL003317	supercont1.83:1255830-1257003	OK	158.345	58.9457	-0.988162	8.08767	6.66134e-16	2.81503e-13		alkaline phosphatase [Source:VB External Description;Acc:AAEL003317]	metabolic process	metabolism
midgut	4dpi	AAEL003404	supercont1.86:1760648-1770227	OK	0.209501	3.30487	2.75842	-5.35298	8.65166e-08	9.58403e-06		hypothetical protein		unknown
midgut	4dpi	AAEL003600	supercont1.92:2370030-2371140	OK	6.34194	0.128318	-3.90042	6.57592	4.83524e-11	8.62033e-09		conserved hypothetical protein		unknown
midgut	4dpi	AAEL003821	supercont1.98:1414682-1415176	OK	18.7624	4.15887	-1.50661	5.71156	1.11944e-08	1.50269e-06		hypothetical protein		unknown
midgut	4dpi	AAEL004027	supercont1.105:1532548-1536110	OK	282.713	158.13	-0.581014	5.03461	4.78824e-07	4.37071e-05		glucose dehydrogenase [Source:VB External Description;Acc:AAEL004027]	alcohol metabolic process	metabolism
midgut	4dpi	AAEL004188	supercont1.109:1180336-1182970	OK	79.6124	32.7172	-0.889269	7.16238	7.92921e-13	1.96679e-10		conserved hypothetical protein		unknown
midgut	4dpi	AAEL004239	supercont1.111:2307468-2308617	OK	2.31297	0	-1.79769e+308	-1.79769e+308	1.31616e-07	1.40349e-05		conserved hypothetical protein [Source:VB External Description;Acc:AAEL004239]	proteolysis	proteolysis
midgut	4dpi	AAEL004386**	supercont1.117:347260-349821	OK	0.202688	1.87092	2.22252	-5.66783	1.44615e-08	1.91868e-06		chorion peroxidase precursor [Source:VB External Description;Acc:AAEL004386]	response to oxidative stress, eggshell chorion assembly	oxidoreductase activity
midgut	4dpi	AAEL004388**	supercont1.117:362284-383373	OK	0.252055	2.53189	2.30707	-6.55141	5.6998e-11	9.85374e-09		heme peroxidase [Source:VB External Description;Acc:AAEL004388]	response to oxidative stress	oxidoreductase activity
midgut	4dpi	AAEL004390**	supercont1.117:315923-318632	OK	0.153883	2.33861	2.72112	-6.20697	5.40169e-10	8.56018e-08		heme peroxidase [Source:VB External Description;Acc:AAEL004390]	response to oxidative stress	oxidoreductase activity
midgut	4dpi	AAEL004704	supercont1.127:2017980-2087230	OK	9.03098	20.1869	0.804375	-5.91342	3.35085e-09	4.83965e-07		map kinase-interacting serine/threonine kinase [Source:VB External Description;Acc:AAEL004704]	regulation of translation	transcription and translation
midgut	4dpi	AAEL004834	supercont1.132:1420728-1432234	OK	1.27097	3.25015	0.938919	-5.7201	1.06461e-08	1.44609e-06		PHD finger protein [Source:VB External Description;Acc:AAEL004834]	zinc ion and protein binding	diverse
midgut	4dpi	AAEL005319	supercont1.151:450664-467211	OK	5.4642	2.13931	-0.937736	7.3144	2.5846e-13	7.37257e-11		myosin light chain kinase [Source:VB External Description;Acc:AAEL005319]	protein folding, kinase activity, response to stress, ATP binding	cytoskeleton, cell wall, cell motility and extracellular structures
midgut	4dpi	AAEL005641***	supercont1.167:85696-86248	OK	16.4614	3.57838	-1.52611	5.82348	5.76347e-09	8.01965e-07	CTLGA5	C-Type lectin (CTL) - galactose binding. [Source:VB External Description;Acc:AAEL005641]	binding	immunity
midgut	4dpi	AAEL006190	supercont1.194:1755027-1828761	OK	55.565	24.9106	-0.802259	6.62961	3.36566e-11	6.19391e-09		conserved hypothetical protein		unknown
midgut	4dpi	AAEL006305	supercont1.199:1810872-1811967	OK	28.1343	10.1189	-1.02259	6.42572	1.31251e-10	2.20231e-08		conserved hypothetical protein		unknown
midgut	4dpi	AAEL006347	supercont1.201:1129059-1131274	OK	6.80308	0.0360772	-5.23947	5.19857	2.00831e-07	2.01007e-05		Apyrase Precursor (EC 3.6.1.5)(Adenosine diphosphatase)(ATP-diphosphohydrolase)(ATP-diphosphatase)(ADPase)(Allergen Aed a 1) [Source:VB External Description;Acc:AAEL006347]	nucleotide catabolic process	metabolism
midgut	4dpi	AAEL006406	supercont1.204:283138-286556	OK	2.34125	0	-1.79769e+308	-1.79769e+308	0.00185001	0.0409081		conserved hypothetical protein [Source:VB External Description;Acc:AAEL006406]	transport, odorand binding protein	diverse
midgut	4dpi	AAEL006408	supercont1.204:271607-272378	OK	3.55278	0	-1.79769e+308	-1.79769e+308	6.7663e-07	5.84875e-05		conserved hypothetical protein [Source:VB External Description;Acc:AAEL006406]	transport, odorand binding protein	diverse
midgut	4dpi	AAEL006417	supercont1.204:322841-324889	OK	14.743	0	-1.79769e+308	-1.79769e+308	3.3394e-21	1.73193e-18		D7 protein, putative [Source:VB External Description;Acc:AAEL006417]	transport, odorand binding protein	diverse
midgut	4dpi	AAEL006424	supercont1.204:345529-347164	OK	19.8877	0.1571	-4.84097	8.25292	2.22045e-16	1.05564e-13		37 kDa salivary gland allergen Aed a 2 Precursor (Protein D7)(Allergen Aed a 2) [Source:VB External Description;Acc:AAEL006424]	transport, odorand binding protein	diverse
midgut	4dpi	AAEL006485***	supercont1.208:816922-836642	OK	5.0498	0.0501507	-4.61207	4.40859	1.04047e-05	0.000652296		inosine-uridine preferring nucleoside hydrolase [Source:VB External Description;Acc:AAEL006485]	hydrolase activity	metabolism
midgut	4dpi	AAEL006704**/***	supercont1.217:211370-212726	OK	1815.94	972.036	-0.624968	5.26908	1.3711e-07	1.44854e-05	FREP18	fibrinogen and fibronectin [Source:VB External Description;Acc:AAEL006704]	signal transduction	immunity
midgut	4dpi	AAEL006710	supercont1.218:353463-383827	OK	0.929924	5.30875	1.74201	-6.51665	7.18972e-11	1.2244e-08		nucleolysin tia-1 [Source:VB External Description;Acc:AAEL006710]	nucleotide binding	unknown
midgut	4dpi	AAEL006774	supercont1.220:1634128-1738258	OK	6.04495	1.86812	-1.17429	5.41988	5.96385e-08	7.01521e-06		conserved hypothetical protein [Source:VB External Description;Acc:AAEL006774]	oxidation-reduction process, metabolic proces	diverse
midgut	4dpi	AAEL006876	supercont1.224:602386-692552	OK	1.48247	4.31979	1.06949	-5.32032	1.03583e-07	1.13642e-05		igf2 mRNA binding protein, putative [Source:VB External Description;Acc:AAEL006876]	nucleotide, nucelic acid binding	transcription and translation
midgut	4dpi	AAEL006989	supercont1.231:800119-801752	OK	34.1457	6.2059	-1.70514	9.96516	0	0		cytochrome P450 [Source:VB External Description;Acc:AAEL006989]	oxidation-reduction process	oxidoreductase activity
midgut	4dpi	AAEL007024***	supercont1.231:838997-845440	OK	172.421	73.6432	-0.850708	7.30809	2.70894e-13	7.53879e-11		cytochrome P450 [Source:VB External Description;Acc:AAEL007024]	monooxygenase activity	oxidoreductase activity
midgut	4dpi	AAEL007097**	supercont1.235:1336360-1337710	OK	3.28559	25.4865	2.0486	-10.7117	0	0		4-nitrophenylphosphatase [Source:VB External Description;Acc:AAEL007097]	hydrolase activity	metabolism
midgut	4dpi	AAEL007394	supercont1.253:1259774-1260660	OK	2.68378	0	-1.79769e+308	-1.79769e+308	0.000137862	0.00561789		conserved hypothetical protein		unknown
midgut	4dpi	AAEL007436	supercont1.256:733170-744743	OK	1.3136	4.29009	1.18354	-5.90654	3.49361e-09	4.98275e-07		conserved hypothetical protein [Source:VB External Description;Acc:AAEL007436]	protein, nucleotide and nucelic acid binding	unknown
midgut	4dpi	AAEL007591	supercont1.265:43153-43747	OK	62.5401	16.6727	-1.32204	8.23579	2.22045e-16	1.01341e-13		conserved hypothetical protein		unknown
midgut	4dpi	AAEL007601	supercont1.266:1320212-1321121	OK	62.2763	15.9259	-1.36364	9.29708	0	0		trypsin [Source:VB External Description;Acc:AAEL007601]	proteolysis	proteolysis
midgut	4dpi	AAEL007669****	supercont1.272:166005-166874	OK	21.3234	45.5473	0.758948	-5.42794	5.70092e-08	6.77578e-06		oxidoreductase [Source:VB External Description;Acc:AAEL007669]	oxidation-reduction process	oxidoreductase activity
midgut	4dpi	AAEL007703	supercont1.275:1333378-1403740	OK	21.2132	4.72997	-1.5007	9.53302	0	0		conserved hypothetical protein		unknown
midgut	4dpi	AAEL007776	supercont1.280:430965-431986	OK	3.55242	0.227322	-2.74902	4.52326	6.08938e-06	0.00042109		conserved hypothetical protein		unknown
midgut	4dpi	AAEL007830	supercont1.285:367494-407292	OK	6.06361	1.28851	-1.54882	6.27246	3.5539e-10	5.79286e-08		cytochrome P450 [Source:VB External Description;Acc:AAEL007830]	oxidation-reduction process	oxidoreductase activity
midgut	4dpi	AAEL008028	supercont1.296:879975-931988	OK	32.5923	15.2829	-0.757342	6.02971	1.64252e-09	2.43391e-07		monocarboxylate transporter [Source:VB External Description;Acc:AAEL008028]	transmembrane transport	transport
midgut	4dpi	AAEL008280	supercont1.310:873339-874388	OK	0	1.67748	1.79769e+308	1.79769e+308	3.10356e-06	0.000225551		hypothetical protein		unknown
midgut	4dpi	AAEL008289	supercont1.311:853288-855815	OK	20.6279	6.58804	-1.14139	5.59826	2.1651e-08	2.83951e-06		pupal cuticle protein 78E, putative [Source:VB External Description;Acc:AAEL008289]	structural constituent of cuticle	cytoskeleton, cell wall, cell motility and extracellular structures
midgut	4dpi	AAEL008579	supercont1.333:968806-996424	OK	1.05898	2.86755	0.996148	-5.37368	7.71473e-08	8.71535e-06		zinc finger protein [Source:VB External Description;Acc:AAEL008579]	intracellular, nucleotide, nucleic acid, ATP and ion binding	diverse
midgut	4dpi	AAEL008619***	supercont1.336:1070147-1071413	OK	4.78857	0	-1.79769e+308	-1.79769e+308	5.33044e-10	8.56624e-08		conserved hypothetical protein [Source:VB External Description;Acc:AAEL008619]	proteolysis	proteolysis
midgut	4dpi	AAEL008726	supercont1.345:88709-101066	OK	0.227481	2.24645	2.29004	-5.12868	2.91784e-07	2.79769e-05		hypothetical protein [Source:VB External Description;Acc:AAEL008726]	structural constituent of cuticle	cytoskeleton, cell wall, cell motility and extracellular structures
midgut	4dpi	AAEL008751	supercont1.346:287759-289429	OK	2.56413	0.295235	-2.1616	4.82488	1.4009e-06	0.000114173		glucosyl/glucuronosyl transferases [Source:VB External Description;Acc:AAEL008751]	metabolic process	metabolism
midgut	4dpi	AAEL008769	supercont1.348:1257996-1261363	OK	77.0311	30.3575	-0.931167	7.70977	1.26565e-14	4.12603e-12		serine-type enodpeptidase, [Source:VB External Description;Acc:AAEL008769]	proteolysis	proteolysis
midgut	4dpi	AAEL008846	supercont1.352:153930-155608	OK	104.905	47.3432	-0.795634	6.75478	1.4305e-11	2.96764e-09		cytochrome P450 [Source:VB External Description;Acc:AAEL008846]	oxidation-reduction process	oxidoreductase activity
midgut	4dpi	AAEL009124***	supercont1.371:393870-395421	OK	15.7033	37.5021	0.870528	-6.3538	2.1006e-10	3.47361e-08		cytochrome P450 [Source:VB External Description;Acc:AAEL009124]	monooxygenase activity	oxidoreductase activity
midgut	4dpi	AAEL009992	supercont1.445:483214-501887	OK	1.53577	0.012512	-4.8101	6.71158	1.92528e-11	3.7233e-09		conserved hypothetical protein		unknown
midgut	4dpi	AAEL009993	supercont1.445:462216-472311	OK	1.50438	0	-1.79769e+308	-1.79769e+308	7.43125e-18	3.68655e-15		conserved hypothetical protein		unknown
midgut	4dpi	AAEL010094	supercont1.452:292305-309421	OK	0.342713	2.70401	2.0656	-6.03659	1.57409e-09	2.36321e-07		cyclin b [Source:VB External Description;Acc:AAEL010094]	cell cycle, cell division	cell cycle
midgut	4dpi	AAEL010097	supercont1.453:577210-587423	OK	1.31455	6.855	1.65149	-8.44588	0	0		conserved hypothetical protein [Source:VB External Description;Acc:AAEL010097]	nucleic acid binding	unknown
midgut	4dpi	AAEL010228	supercont1.464:159724-161155	OK	10.8626	0.695425	-2.74855	9.36479	0	0		conserved hypothetical protein		unknown
midgut	4dpi	AAEL010235	supercont1.464:161415-162432	OK	22.388	0.136271	-5.10163	8.71234	0	0		30 kDa salivary gland allergen Aed a 3 Precursor (Allergen Aed a 3) [Source:VB External Description;Acc:AAEL010235]	extracellular region	unknown
midgut	4dpi	AAEL010242	supercont1.464:147093-147775	OK	4.75709	0.111527	-3.75313	3.68364	0.000229927	0.00819833		conserved hypothetical protein		unknown
midgut	4dpi	AAEL010893	supercont1.516:496781-530821	OK	18.0541	3.98033	-1.51201	9.54201	0	0		carbonic anhydrase [Source:VB External Description;Acc:AAEL010893]	one-carbon metabolic process	metabolism
midgut	4dpi	AAEL011510***	supercont1.586:168887-170763	OK	15.2274	46.5825	1.11813	-8.33231	0	0		multiple inositol polyphosphate phosphatase [Source:VB External Description;Acc:AAEL011510]	acid phosphatase activity	metabolism
midgut	4dpi	AAEL012486	supercont1.702:370311-487884	OK	5.64083	1.34136	-1.43634	5.83008	5.54009e-09	7.80401e-07		conserved hypothetical protein		unknown
midgut	4dpi	AAEL013338	supercont1.826:132448-133278	OK	2.17229	17.731	2.09953	-8.72692	0	0		lethal(2)essential for life protein, l2efl [Source:VB External Description;Acc:AAEL013338]	response to heat	unknown
midgut	4dpi	AAEL013707	supercont1.901:264630-265832	OK	117.219	44.5602	-0.967204	7.72397	1.13243e-14	3.91545e-12		trypsin [Source:VB External Description;Acc:AAEL013707]	proteolysis	proteolysis
midgut	4dpi	AAEL013776	supercont1.918:206178-209076	OK	78.1627	24.3036	-1.16817	9.02294	0	0		predicted protein		unknown
midgut	4dpi	AAEL014234	supercont1.1046:87732-89013	OK	62.4257	22.9977	-0.998583	6.86005	6.88338e-12	1.51037e-09		conserved hypothetical protein		unknown
midgut	4dpi	AAEL014411	supercont1.1104:163665-179614	OK	15.6443	4.62274	-1.21912	7.26276	3.79252e-13	1.0303e-10		cytochrome P450 [Source:VB External Description;Acc:AAEL014411]	oxidation-reduction process	oxidoreductase activity
midgut	4dpi	AAEL014607	supercont1.1188:47263-49000	OK	164.305	67.3397	-0.891972	7.72765	1.08802e-14	3.87947e-12		cytochrome P450 [Source:VB External Description;Acc:AAEL014607]	oxidation-reduction process	oxidoreductase activity
midgut	4dpi	AAEL014609***	supercont1.1188:49550-51215	OK	301.252	138.493	-0.777131	6.75641	1.41454e-11	2.98886e-09		cytochrome P450 [Source:VB External Description;Acc:AAEL014609]	oxidation-reduction process	oxidoreductase activity
midgut	4dpi	AAEL014613	supercont1.1188:73218-74892	OK	50.2237	1.84045	-3.30648	16.1302	0	0		cytochrome P450 [Source:VB External Description;Acc:AAEL014613]	oxidation-reduction process	oxidoreductase activity
midgut	4dpi	AAEL014616***	supercont1.1188:185261-186934	OK	110.665	45.5801	-0.887038	7.50177	6.30607e-14	1.89348e-11		cytochrome P450 [Source:VB External Description;Acc:AAEL014616]	oxidation-reduction process	oxidoreductase activity
midgut	4dpi	AAEL014617	supercont1.1188:32147-33821	OK	425.021	54.6703	-2.05082	17.3285	0	0		cytochrome P450 [Source:VB External Description;Acc:AAEL014617]	oxidation-reduction process	oxidoreductase activity
midgut	4dpi	AAEL017320	supercont1.327:1256083-1257076	OK	243.214	133.122	-0.602679	5.22363	1.75452e-07	1.7716e-05		Novel protein coding	metabolic process, oxidation-reduction process	diverse
midgut	4dpi	AAEL017334	supercont1.21:242903-245588	OK	8.73029	2.63802	-1.19677	6.66715	2.60811e-11	4.87846e-09		Novel protein coding	chitin metabolic process	cytoskeleton, cell wall, cell motility and extracellular structures
midgut	4dpi	AAEL017380	supercont1.301:684783-685342	OK	0.432639	15.9458	3.60705	-7.75015	9.10383e-15	3.3508e-12		Novel protein coding		unknown
* previously detected as differentially expressed in carcasses of Ae. aegypti mosquitoes of either the MOYO-R or MOYO-S strain infected wit DENV2Jam1409 (behura et al., 2011)
** previosuly detected as differentially expressed in Ae. aegypti mosquitoes of the Rokefeller strain 10 dpi with DENV2 New Guinea (Xi et al., 2008)
*** previously detected as differentially expressed in salivary glands of Ae. aegtypi mosquitoes of the LVP strain infected with DENV2 Thailand 16681 (Luplertlop et al., 2011)
****previously detected as differentially expressed in salivary glands of the Ae. aegypti mosquitoes of the Rockefeller strain infected with DENV2 New Guinea 14dpi (Sim et al., 2012)

## Sheet: 14dpi
TISSUE	TIME	ENSEMBL GENE ID	LOCUS	STATUS	FPKM_B	FPKM_DENVI	ln(fold_change)	test_stat	p_value	q_value	ImmunoDB	BIOMART DESCRIPTION	GO TERM NAME (bp)	Functional Category
carcasses	14dpi	AAEL000885	supercont1.18:499310-512011	OK	0.84883	0.242349	-1.25348	4.47703	7.56874e-06	0.00107652		cytoplasmic dynein heavy chain [Source:VB External Description;Acc:AAEL000885]	microtubule-based movement	cytoskeleton, cell wall, cell motility and extracellular structures
carcasses	14dpi	AAEL001702	supercont1.39:1446407-1451003	OK	55.752	16.9298	-1.19184	5.5261	3.27422e-08	8.08847e-06		conserved hypothetical protein		unknown
carcasses	14dpi	AAEL001703****	supercont1.39:2531925-2532952	OK	35.9927	1.3221	-3.3041	11.5335	0	0		serine-type enodpeptidase, [Source:VB External Description;Acc:AAEL001703]	proteolysis	proteolysis
carcasses	14dpi	AAEL002301****	supercont1.53:73026-92773	OK	42.3137	88.2085	0.734593	-4.23328	2.3031e-05	0.00279569		serine protease [Source:VB External Description;Acc:AAEL002301]	proteolysis	proteolysis
carcasses	14dpi	AAEL002467	supercont1.58:1261881-1263616	OK	2.79713	0.487888	-1.74627	5.15371	2.55385e-07	5.44859e-05		conserved hypothetical protein [Source:VB External Description;Acc:AAEL002467]	chitin metabolic process	metabolism
carcasses	14dpi	AAEL002565	supercont1.60:1501004-1524042	OK	22.553	8.86207	-0.934089	5.46401	4.65491e-08	1.11095e-05		titin [Source:VB External Description;Acc:AAEL002565]	protein phosphorylation, nucleic acid binding, protein serine/threonine kinase activity, ATP binding	cytoskeleton, cell wall, cell motility and extracellular structures
carcasses	14dpi	AAEL002610***/****	supercont1.61:1651637-1653233	OK	169.904	401.189	0.859198	-4.98261	6.27315e-07	0.000116227		serine protease [Source:VB External Description;Acc:AAEL002610]	proteolysis	proteolysis
carcasses	14dpi	AAEL002759	supercont1.67:2538274-2564315	OK	130.171	54.9413	-0.862587	8.31336	0	0		tropomyosin invertebrate		cytoskeleton, cell wall, cell motility and extracellular structures
carcasses	14dpi	AAEL002971	supercont1.73:1903305-1926508	OK	23.9443	9.01214	-0.977159	5.04487	4.53831e-07	8.75396e-05		sarcalumenin [Source:VB External Description;Acc:AAEL002971]	GTPase activity, GTP bingin	signal transduction
carcasses	14dpi	AAEL003060	supercont1.76:108725-109783	OK	57.3545	2.85284	-3.00094	11.9875	0	0		serine-type enodpeptidase, [Source:VB External Description;Acc:AAEL003060]	proteolysis	proteolysis
carcasses	14dpi	AAEL003078	supercont1.76:1147839-1182225	OK	23.1875	9.28983	-0.914696	5.39311	6.92488e-08	1.59851e-05		conserved hypothetical protein		unknown
carcasses	14dpi	AAEL003082	supercont1.76:1207090-1217814	OK	7.7627	2.03147	-1.34057	4.99785	5.79724e-07	0.000108841		kinectin, putative		cytoskeleton, cell wall, cell motility and extracellular structures
carcasses	14dpi	AAEL003298	supercont1.83:1253903-1255653	OK	1.21274	0.0399233	-3.41368	5.47521	4.37004e-08	1.06094e-05		alkaline phosphatase [Source:VB External Description;Acc:AAEL003298]	metabolic process	metabolism
carcasses	14dpi	AAEL003669	supercont1.94:2304409-2304784	OK	135.872	403.999	1.0897	-6.24669	4.19239e-10	1.51367e-07		histone H2A [Source:VB External Description;Acc:AAEL003669]	nucleosome assembly	chromatin structure and dynamics
carcasses	14dpi	AAEL003673	supercont1.94:2285106-2290958	OK	353.293	1243.65	1.25851	-7.3761	1.62981e-13	9.17973e-11		histone H4 [Source:VB External Description;Acc:AAEL003673]	nucleosome assembly, transcription initiation, DNA-dependent	chromatin structure and dynamics
carcasses	14dpi	AAEL003689	supercont1.94:2302285-2302597	OK	316.574	1167.09	1.30471	-7.62027	2.53131e-14	1.48514e-11		histone H4 [Source:VB External Description;Acc:AAEL003689]	nucleosome assembly, transcription initiation, DNA-dependent	chromatin structure and dynamics
carcasses	14dpi	AAEL003837	supercont1.98:2038221-2111358	OK	20.2951	7.83694	-0.951533	5.65165	1.58919e-08	4.47548e-06		ryanodine receptor 3, brain [Source:VB External Description;Acc:AAEL003837]	transport	transport
carcasses	14dpi	AAEL003962	supercont1.102:1394838-1408721	OK	11.1919	69.9726	1.83291	-8.32697	0	0		hypothetical protein		unknown
carcasses	14dpi	AAEL004197	supercont1.109:1923347-1923938	OK	282.534	82.2798	-1.23367	6.04192	1.52289e-09	5.10565e-07		hypothetical protein		unknown
carcasses	14dpi	AAEL005004	supercont1.138:1295037-1496939	OK	71.9344	198.074	1.01289	-5.98486	2.16574e-09	6.93086e-07		hypothetical protein [Source:VB External Description;Acc:AAEL005004]	negative regulation of translation, rRNA N-glycosylase activity	transcription and translation
carcasses	14dpi	AAEL005098	supercont1.141:2140176-2140809	OK	39.2811	11.1971	-1.25509	5.12785	2.93062e-07	6.15912e-05		cysteine-rich venom protein, putative		unknown
carcasses	14dpi	AAEL005317*****	supercont1.151:704064-759800	OK	30.4432	11.9865	-0.932081	6.27407	3.5174e-10	1.30338e-07		titin (connectin) [Source:VB External Description;Acc:AAEL005317]	protein binding	cytoskeleton, cell wall, cell motility and extracellular structures
carcasses	14dpi	AAEL005319	supercont1.151:450664-467211	OK	34.0808	12.2599	-1.0224	5.95817	2.55071e-09	7.80794e-07		myosin light chain kinase [Source:VB External Description;Acc:AAEL005319]	protein folding, response to stress, kinase activity, ATP binding	cytoskeleton, cell wall, cell motility and extracellular structures
carcasses	14dpi	AAEL005324	supercont1.151:525191-569558	OK	18.618	6.22067	-1.09625	6.49698	8.19482e-11	3.49671e-08		titin [Source:VB External Description;Acc:AAEL005324]	protein binding	cytoskeleton, cell wall, cell motility and extracellular structures
carcasses	14dpi	AAEL005338	supercont1.151:490968-515195	OK	6.59468	2.48027	-0.977897	5.09468	3.49334e-07	7.02711e-05		novex-3 (titin isoform) [Source:VB External Description;Acc:AAEL005338]	protein binding	unknown
carcasses	14dpi	AAEL005416*****	supercont1.155:391623-400419	OK	21.3556	7.59597	-1.0337	5.90278	3.57422e-09	1.04851e-06		HPX3	oxidase/peroxidase [Source:VB External Description;Acc:AAEL005416]	oxidoreductase activity
carcasses	14dpi	AAEL005507	supercont1.160:436467-584840	OK	4.869	18	1.30748	-5.12264	3.01294e-07	6.239e-05		inhibitory pou [Source:VB External Description;Acc:AAEL005507]	regulation of transcription, DNA-dependent	transcription and translation
carcasses	14dpi	AAEL005961	supercont1.182:1446598-1449390	OK	314.635	134.712	-0.848274	4.95751	7.14033e-07	0.000130575		actin [Source:VB External Description;Acc:AAEL005961]	cytoskeleton	cytoskeleton, cell wall, cell motility and extracellular structures
carcasses	14dpi	AAEL006106	supercont1.189:2063846-2065664	OK	1.66014	7.34963	1.48775	-5.03191	4.85614e-07	9.24045e-05		conserved hypothetical protein [Source:VB External Description;Acc:AAEL006106]	transport, odorant binding	diverse
carcasses	14dpi	AAEL006109	supercont1.189:217056-217969	OK	6.91526	23.5302	1.22455	-5.09727	3.44587e-07	7.03208e-05		conserved hypothetical protein [Source:VB External Description;Acc:AAEL006109]	transport, odorant binding	diverse
carcasses	14dpi	AAEL006126	supercont1.191:31512-47259	OK	2.75564	38.5839	2.63919	-14.089	0	0		conserved hypothetical protein [Source:VB External Description;Acc:AAEL006126]	lipid transport	transport
carcasses	14dpi	AAEL006138	supercont1.191:160678-167375	OK	6.16495	118.822	2.95875	-15.8702	0	0		hypothetical protein [Source:VB External Description;Acc:AAEL006138]	lipid transport	transport
carcasses	14dpi	AAEL006563****	supercont1.210:1324312-1325830	OK	3.48832	48.047	2.62276	-11.3705	0	0		Vitellogenic carboxypeptidase Precursor (EC 3.4.16.-) [Source:VB External Description;Acc:AAEL006563]	proteolysis	proteolysis
carcasses	14dpi	AAEL007585**/*****	supercont1.265:1263241-1264436	OK	1.19899	13.9011	2.45049	-8.49113	0	0		cathepsin b [Source:VB External Description;Acc:AAEL007585]	proteolysis	immunity
carcasses	14dpi	AAEL007599	supercont1.265:1279703-1280845	OK	2.23703	25.9	2.44909	-9.28633	0	0		cathepsin b [Source:VB External Description;Acc:AAEL007599]	proteolysis	immunity
carcasses	14dpi	AAEL007769	supercont1.279:1499942-1500743	OK	2.7079	0.0549793	-3.89697	5.22357	1.75502e-07	3.86131e-05		hypothetical protein		unknown
carcasses	14dpi	AAEL007818****	supercont1.284:1063737-1064684	OK	238.974	5.88102	-3.70463	21.2269	0	0		Trypsin 3A1 Precursor (EC 3.4.21.4) [Source:VB External Description;Acc:AAEL007818]	proteolysis	proteolysis
carcasses	14dpi	AAEL007898	supercont1.288:811867-881217	OK	21.0962	10.3332	-0.713732	4.09971	4.13665e-05	0.00434688		calmin [Source:VB External Description;Acc:AAEL007898]	calcium-dependent cysteine-type endopeptidase activity, acting binding, integral to membrane	cytoskeleton, cell wall, cell motility and extracellular structures
carcasses	14dpi	AAEL008106	supercont1.301:791156-792397	OK	125.645	326.002	0.953444	-5.61451	1.97119e-08	5.33774e-06		hypothetical protein		unknown
carcasses	14dpi	AAEL008155	supercont1.304:124844-151262	OK	0.20417	0.00380914	-3.98155	3.85218	0.000117071	0.00905755		protease m1 zinc metalloprotease [Source:VB External Description;Acc:AAEL008155]	proteolysis	proteolysis
carcasses	14dpi	AAEL008600	supercont1.334:645658-647390	OK	0.532207	0	-1.79769e+308	-1.79769e+308	0.000294993	0.0187108		zinc carboxypeptidase [Source:VB External Description;Acc:AAEL008600]	proteolysis	proteolysis
carcasses	14dpi	AAEL008781****	supercont1.348:1273196-1274190	OK	18.5051	0.863218	-3.06513	9.70259	0	0		serine-type enodpeptidase, [Source:VB External Description;Acc:AAEL008781]	proteolysis	proteolysis
carcasses	14dpi	AAEL008844	supercont1.352:502795-559774	OK	387.044	96.9092	-1.38476	8.03587	8.88178e-16	5.68475e-13		calcium-binding protein, putative [Source:VB External Description;Acc:AAEL008844]	calcium ion binding	unknown
carcasses	14dpi	AAEL009847	supercont1.432:618855-654162	OK	4.31037	1.68605	-0.938637	4.88494	1.03463e-06	0.000184413		microtubule-associated protein		cytoskeleton, cell wall, cell motility and extracellular structures
carcasses	14dpi	AAEL010393	supercont1.475:138672-139648	OK	0.466129	3.85078	2.11157	-5.32283	1.02166e-07	2.32033e-05		ferritin subunit, putative [Source:VB External Description;Acc:AAEL010393]	oxidation-reduction process, iron ion transport	oxidoreductase activity
carcasses	14dpi	AAEL010434	supercont1.477:206260-212970	OK	3.41672	50.6076	2.69542	-13.9079	0	0		Vitellogenin-A1 Precursor (VG)(PVG1) [Contains Vitellin light chain(VL);Vitellin heavy chain(VH)] [Source:VB External Description;Acc:AAEL010434]	lipid transport	transport
carcasses	14dpi	AAEL010833 (AAEL0010839)*/****	supercont1.511:75298-186063	OK	63.0497	19.0263	-1.1981	8.27381	2.22045e-16	1.48886e-13		conserved hypothetical protein [Source:VB External Description;Acc:AAEL010833]	cell redox homeostasis	oxidoreductase activity
carcasses	14dpi	AAEL010884	supercont1.516:583397-588805	OK	234.526	79.6013	-1.08054	6.3602	2.01495e-10	8.10642e-08		ADP,ATP carrier protein [Source:VB External Description;Acc:AAEL010884]	mitochondrial inner membrane, transporter activity	cytoskeleton, cell wall, cell motility and extracellular structures
carcasses	14dpi	AAEL011126	supercont1.542:235192-236496	OK	16.8831	37.8416	0.807093	-4.12094	3.77335e-05	0.00405592		alcohol dehydrogenase [Source:VB External Description;Acc:AAEL011126]	metabolic process	metabolism
carcasses	14dpi	AAEL011130	supercont1.542:233395-234618	OK	13.1606	36.0114	1.00661	-4.90972	9.12073e-07	0.000164653		alcohol dehydrogenase [Source:VB External Description;Acc:AAEL011130]	metabolic process	metabolism
carcasses	14dpi	AAEL011455***	supercont1.581:655549-656085	OK	20.3906	56.1534	1.01301	-4.51573	6.3098e-06	0.000915962	CTLMA12	C-Type lectin (CTL) - mannose binding. [Source:VB External Description;Acc:AAEL011455]	binding	immunity
carcasses	14dpi	AAEL011542	supercont1.589:166258-168563	OK	3.81446	0.0374524	-4.62348	6.29113	3.15158e-10	1.2327e-07		metalloproteinase, putative [Source:VB External Description;Acc:AAEL011542]	proteolysis	proteolysis
carcasses	14dpi	AAEL011569	supercont1.590:59861-62696	OK	4.98327	1.62041	-1.1234	4.37599	1.20882e-05	0.00162109		conserved hypothetical protein		unknown
carcasses	14dpi	AAEL012216**/*****	supercont1.667:5387-6582	OK	0.907032	11.6454	2.55249	-8.33808	0	0		cathepsin b [Source:VB External Description;Acc:AAEL012216]	proteolysis	immunity
carcasses	14dpi	AAEL012764*****	supercont1.738:244707-275769	OK	25.4547	80.3787	1.14985	-6.27728	3.44542e-10	1.31121e-07		conserved hypothetical protein [Source:VB External Description;Acc:AAEL012764]	metabolic process	metabolism
carcasses	14dpi	AAEL013027	supercont1.778:391404-392020	OK	0.767123	10.558	2.62199	-7.15085	8.62421e-13	4.1875e-10		conserved hypothetical protein [Source:VB External Description;Acc:AAEL013027]	oocyte development, serine-type endopeptidase inhibitor activity, extracellular region	diverse
carcasses	14dpi	AAEL013559	supercont1.869:90786-110729	OK	20.4798	8.35993	-0.895988	5.31831	1.04736e-07	2.34093e-05		uncoordinated protein [Source:VB External Description;Acc:AAEL013559]	protein phosphorylation, protein serine/threonine kinase activity	diverse
carcasses	14dpi	AAEL014188****	supercont1.1028:217404-218439	OK	43.7254	2.4713	-2.87318	11.1314	0	0		serine-type enodpeptidase, [Source:VB External Description;Acc:AAEL014188]	proteolysis	proteolysis
carcasses	14dpi	AAEL014516	supercont1.1145:20754-22785	OK	5.62742	0.0687555	-4.40485	7.23095	4.79616e-13	2.50129e-10		metalloproteinase, putative [Source:VB External Description;Acc:AAEL014516]	proteolysis	proteolysis
carcasses	14dpi	AAEL014561	supercont1.1166:69079-69674	OK	2.18926	29.725	2.60842	-8.80295	0	0		conserved hypothetical protein [Source:VB External Description;Acc:AAEL014561]	biological_process, extracellular region	unknown
carcasses	14dpi	AAEL015312**/*****	supercont1.1783:19565-20795	OK	1.72213	25.7038	2.70308	-10.2711	0	0		cathepsin b [Source:VB External Description;Acc:AAEL015312]	proteolysis	immunity
carcasses	14dpi	AAEL016994	supercont1.352:560349-560628	OK	260.32	53.554	-1.58122	7.76019	8.43769e-15	5.1657e-12		Novel protein coding		unknown
carcasses	14dpi	AAEL017047	supercont1.35:3370119-3371653	OK	21.1778	9.68786	-0.782078	3.68705	0.00022687	0.015285		Novel protein coding		unknown
carcasses	14dpi	AAEL017231	supercont1.556:24408-24567	OK	3163.07	984.966	-1.16669	6.87459	6.2168e-12	2.91796e-09		Novel protein coding		unknown
carcasses	14dpi	AAEL017380	supercont1.301:684783-685342	OK	158.127	800.025	1.62124	-9.34157	0	0		Novel protein coding		unknown
carcasses	14dpi	AAEL017403	supercont1.764:141872-142166	OK	1.66306	24.2349	2.67914	-7.27727	3.40616e-13	1.8447e-10		Vitelline membrane protein 15a-2 Precursor [Contains Trypsin-modulating oostatic factor(TMOF)(OOSH)] [Source:VB External Description;Acc:AAEL017403]	oocyte development, serine-type endopeptidase inhibitor activity, extracellular region, hormone activity	diverse
carcasses	14dpi	AAEL017501	supercont1.9:177073-177400	OK	0.278242	5.23822	2.93525	-4.68705	2.77165e-06	0.000443496		Novel protein coding		unknown
carcasses	14dpi	AAEL017513	supercont1.366:354226-365772	OK	68.7065	131.452	0.648798	-3.7928	0.00014896	0.0111569		Novel protein coding		unknown
carcasses	14dpi	AAEL017536	supercont1.31:652166-652602	OK	248.346	1143.76	1.52725	-8.54148	0	0		Holotricin, Glycine Rich Repreat Protein (GRRP), Anti-Microbial Peptide		immunity
TISSUE	TIME	ENSEMBL GENE ID	LOCUS	STATUS	FPKM_B	FPKM_DENVI	ln(fold_change)	test_stat	p_value	q_value	ImmunoDB	BIOMART DESCRIPTION	GO TERM NAME (bp)	Functional Category
midgut	14dpi	AAEL001054	supercont1.22:1422024-1422744	OK	3.8598	23.4431	1.80396	-5.66009	1.5129e-08	9.75061e-06		glutathionetransferase [Source:VB External Description;Acc:AAEL001054]	transferase activity	oxidoreductase activity
midgut	14dpi	AAEL001702	supercont1.39:1446407-1451003	OK	54.6597	209.371	1.34298	-5.20296	1.96137e-07	7.11057e-05		conserved hypothetical protein		unknown
midgut	14dpi	AAEL002848	supercont1.69:2137919-2144560	OK	77.715	10.4744	-2.00411	7.49203	6.77236e-14	7.85662e-11		tubulin beta chain [Source:VB External Description;Acc:AAEL002848]	microtubule-based process	cytoskeleton, cell wall, cell motility and extracellular structures
midgut	14dpi	AAEL003389	supercont1.85:2699726-2700586	q1	14.2666	1.75713	-2.09424	5.95752	2.56101e-09	1.98069e-06	ATT	Attacin,Anti-Microbial Peptide. [Source:VB External Description;Acc:AAEL003389]	extracellular region	immunity
midgut	14dpi	AAEL003603	supercont1.92:513460-514482	OK	24.4004	94.1036	1.3498	-5.18275	2.18636e-07	7.45999e-05		transcription factor, putative		transcription and translation
midgut	14dpi	AAEL004197	supercont1.109:1923347-1923938	OK	530.205	50.1237	-2.35877	8.48782	0	0		hypothetical protein		unknown
midgut	14dpi	AAEL007669**	supercont1.272:166005-166874	OK	13.8357	53.1384	1.34565	-4.98542	6.18286e-07	0.000155929		oxidoreductase [Source:VB External Description;Acc:AAEL007669]	metabolic process	oxidoreductase activity
midgut	14dpi	AAEL007776	supercont1.280:430965-431986	OK	15.4779	0.12081	-4.85294	6.61116	3.81319e-11	4.02153e-08		conserved hypothetical protein		unknown
midgut	14dpi	AAEL008915	supercont1.357:271788-434303	OK	1.29009	0.0424056	-3.41519	5.49722	3.85827e-08	2.03454e-05		sodium-and chloride-activated ATP-sensitive potassium channel [Source:VB External Description;Acc:AAEL008915]	potassium ion transport	transport
midgut	14dpi	AAEL010675	supercont1.495:270131-270329	OK	123.75	17.9432	-1.93106	6.24572	4.21852e-10	3.76454e-07		hypothetical protein		unknown
midgut	14dpi	AAEL014613	supercont1.1188:73218-74892	OK	6.06137	22.5094	1.312	-4.74684	2.06617e-06	0.000386608		cytochrome P450 [Source:VB External Description;Acc:AAEL014613]	oxidation-reduction process	oxidoreductase activity
midgut	14dpi	AAEL017052	supercont1.583:18849-39338	OK	11.3456	1.00604	-2.42281	6.30494	2.8831e-10	2.78723e-07		Novel protein coding		unknown
midgut	14dpi	AAEL017571	supercont1.50:1773301-1782041	OK	15.9101	63.5156	1.38433	-5.3338	9.61777e-08	3.84744e-05			RNA-dependent DNA replication	unknown
TISSUE	TIME	ENSEMBL GENE ID	LOCUS	STATUS	FPKM_B	FPKM_DENVI	ln(fold_change)	test_stat	p_value	q_value	ImmunoDB	BIOMART DESCRIPTION	GO TERM NAME (bp)	Functional Category
salivary glands	14dpi	AAEL005432**	supercont1.156:145549-218893	OK	199.778	3.87022	-3.9439	9.02287	0	0		conserved hypothetical protein [Source:VB External Description;Acc:AAEL005432]	cell-matrix adhesion	diverse
salivary glands	14dpi	AAEL004616**	supercont1.125:2451418-2452676	OK	110.08	5.59902	-2.97862	5.55045	2.8493e-08	4.664e-06		actin [Source:VB External Description;Acc:AAEL004616]	cytoskeleton	cytoskeleton, cell wall, cell motility and extracellular structures
salivary glands	14dpi	AAEL009760**	supercont1.426:745421-763973	OK	424.957	0.16567	-7.84974	7.18507	6.71685e-13	3.01338e-10		Niemann-Pick Type C-2, putative		immunity
salivary glands	14dpi	AAEL006702**/***/*****	supercont1.217:303346-304455	OK	61.7612	2.09564	-3.38342	5.14897	2.61918e-07	3.68909e-05	FREP33	fibrinogen and fibronectin [Source:VB External Description;Acc:AAEL006702]	signal transduction	immunity
salivary glands	14dpi	AAEL015136**	supercont1.1514:6696-7372	OK	35.3828	0	-1.79769e+308	-1.79769e+308	0.00137505	0.0375136		Niemann-Pick Type C-2, putative		immunity
salivary glands	14dpi	AAEL004798**	supercont1.130:753594-754817	OK	1687.19	0.942081	-7.49049	7.54108	4.66294e-14	2.45575e-11		conserved hypothetical protein [Source:VB External Description;Acc:AAEL004798]	chitin metabolic process, Mucin-like peritrophin	diverse
salivary glands	14dpi	AAEL002295**/****	supercont1.53:2706676-2734305	OK	219.529	5.18893	-3.74496	6.71541	1.87537e-11	6.31009e-09		conserved hypothetical protein [Source:VB External Description;Acc:AAEL002495]	leucine rich transmembrane protein	immunity
salivary glands	14dpi	AAEL009219**	supercont1.381:663645-670692	OK	289.256	7.06026	-3.71283	6.49132	8.50864e-11	2.14719e-08		predicted protein [Source:VB External Description;Acc:AAEL009219]	chitin metabolic process	diverse
salivary glands	14dpi	AAEL000647**/****	supercont1.13:1043132-1045441	OK	95.4078	7.51019	-2.5419	4.90909	9.14986e-07	0.000110832		predicted protein [Source:VB External Description;Acc:AAEL000647]	carbohydrate metabolic process	metabolism
salivary glands	14dpi	AAEL009244**/****	supercont1.383:120307-129486	OK	520.231	10.5544	-3.89773	6.71671	1.85871e-11	6.62194e-09		serine-type enodpeptidase, [Source:VB External Description;Acc:AAEL009244]	proteolysis	proteolysis
salivary glands	14dpi	AAEL010782**	supercont1.507:541457-543672	OK	46.9182	0.978635	-3.87	5.12706	2.94305e-07	4.09761e-05		carboxypeptidase [Source:VB External Description;Acc:AAEL010782]	proteolysis	proteolysis
salivary glands	14dpi	AAEL012783**	supercont1.739:317288-320472	OK	94.6928	2.21013	-3.75759	6.54034	6.13791e-11	1.61627e-08		protease m1 zinc metalloprotease [Source:VB External Description;Acc:AAEL012783]	proteolysis	proteolysis
salivary glands	14dpi	AAEL015312**/*****	supercont1.1783:19565-20795	OK	0.609151	27.6598	3.81567	-4.90235	9.46946e-07	0.000113568		cathepsin b [Source:VB External Description;Acc:AAEL015312]	proteolysis	immunity
salivary glands	14dpi	AAEL012216**/*****	supercont1.667:5387-6582	OK	0.268197	14.7656	4.00833	-4.33928	1.42951e-05	0.00128264		cathepsin b [Source:VB External Description;Acc:AAEL012216]	proteolysis	immunity
salivary glands	14dpi	AAEL011641**	supercont1.596:574884-617685	OK	200.572	2.27286	-4.48014	7.09934	1.25344e-12	5.2355e-10		transferrin [Source:VB External Description;Acc:AAEL011641]	iron ion transport	transport
salivary glands	14dpi	AAEL002495**/****	supercont1.58:1609508-1610687	OK	3461.74	2.5317	-7.22064	3.97417	7.06258e-05	0.00455048		conserved hypothetical protein (Mucin-like peritrophin)		cytoskeleton, cell wall, cell motility and extracellular structures
salivary glands	14dpi	AAEL013885**	supercont1.953:285201-285815	OK	1168.02	9.5456	-4.80699	7.59555	3.06422e-14	1.68713e-11		conserved hypothetical protein		unknown
salivary glands	14dpi	AAEL000940**	supercont1.19:1035892-1043688	OK	37.7761	0.447511	-4.43573	4.84449	1.2694e-06	0.000147849		conserved hypothetical protein		unknown
salivary glands	14dpi	AAEL003190**	supercont1.81:2656235-2656913	OK	31.5024	0.462185	-4.22185	4.11432	3.88315e-05	0.0028507		hypothetical protein		unknown
salivary glands	14dpi	AAEL002578**	supercont1.61:376200-386582	OK	333.338	5.42472	-4.11819	6.71649	1.86153e-11	6.4425e-09		conserved hypothetical protein		unknown
salivary glands	14dpi	AAEL005868**	supercont1.177:210214-218807	OK	58.7621	0.956434	-4.11804	4.91442	8.90455e-07	0.00010895		hypothetical protein		unknown
salivary glands	14dpi	AAEL002263**/****	supercont1.52:2311936-2313017	OK	217.806	6.05785	-3.58225	6.57176	4.97256e-11	1.3385e-08		conserved hypothetical protein		unknown
salivary glands	14dpi	AAEL005536**	supercont1.162:593549-603811	OK	119.095	5.2153	-3.12832	5.90728	3.47813e-09	7.6601e-07		tetraspanin 29fb [Source:VB External Description;Acc:AAEL005536]	membrane	diverse
salivary glands	14dpi	AAEL005543**	supercont1.162:2022066-2029083	OK	121.895	5.69691	-3.06324	5.56896	2.56271e-08	4.25235e-06		conserved hypothetical protein [Source:VB External Description;Acc:AAEL005543]	transferase activity, transferring acyl groups other than amino-acyl groups	unknown
salivary glands	14dpi	AAEL010416**	supercont1.476:150512-151846	OK	53.7121	3.1982	-2.82105	4.49874	6.83586e-06	0.000667764		hypothetical protein		unknown
salivary glands	14dpi	AAEL012532**	supercont1.706:582097-588508	OK	114.813	7.03004	-2.79311	6.58598	4.51905e-11	1.24407e-08		tetraspanin 29fb [Source:VB External Description;Acc:AAEL012532]	membrane	diverse
salivary glands	14dpi	AAEL006493**	supercont1.208:877688-878457	OK	109.092	6.8067	-2.77428	4.62912	3.67231e-06	0.000380194		hypothetical protein		unknown
salivary glands	14dpi	AAEL011588**	supercont1.592:566485-598870	OK	23.0132	0	-1.79769e+308	-1.79769e+308	0.00127167	0.0359902		conserved hypothetical protein		unknown
salivary glands	14dpi	AAEL003950	supercont1.102:2143849-2172591	OK	0	10.1118	1.79769e+308	1.79769e+308	0.00198574	0.0474424		helicase [Source:VB External Description;Acc:AAEL003950]	nucleic acid and ATP binding, helicase activity	chromatin structure and dynamics
salivary glands	14dpi	AAEL008588****	supercont1.333:337823-344747	OK	33.5862	0.086581	-5.96079	5.66168	1.49899e-08	2.55736e-06		innexin [Source:VB External Description;Acc:AAEL008588]	gap junction	cytoskeleton, cell wall, cell motility and extracellular structures
salivary glands	14dpi	AAEL011343	supercont1.570:52270-64072	OK	35.9126	0.249745	-4.9684	5.27272	1.34414e-07	1.98556e-05		conserved hypothetical protein [Source:VB External Description;Acc:AAEL011343]	cell adhesion, tissue regeneration, integral to membrane	cytoskeleton, cell wall, cell motility and extracellular structures
salivary glands	14dpi	AAEL008610	supercont1.334:660663-686221	OK	24.191	0.38103	-4.15086	5.66998	1.42811e-08	2.47125e-06		myosin vii [Source:VB External Description;Acc:AAEL008610]	cytoskeleton	cytoskeleton, cell wall, cell motility and extracellular structures
salivary glands	14dpi	AAEL002848	supercont1.69:2137919-2144560	OK	46.4634	2.15243	-3.07207	4.97988	6.36242e-07	8.02791e-05		tubulin beta chain [Source:VB External Description;Acc:AAEL002848]	microtubule-based process	cytoskeleton, cell wall, cell motility and extracellular structures
salivary glands	14dpi	AAEL000335	supercont1.6:3209272-3211399	OK	0	14.1752	1.79769e+308	1.79769e+308	0.00141677	0.0378838		lamin [Source:VB External Description;Acc:AAEL000335]	intermediate filament	cytoskeleton, cell wall, cell motility and extracellular structures
salivary glands	14dpi	AAEL004646	supercont1.125:2467303-2468527	OK	11.7032	0	-1.79769e+308	-1.79769e+308	0.00212398	0.04986		actin [Source:VB External Description;Acc:AAEL004646]	protein and ATP binding	cytoskeleton, cell wall, cell motility and extracellular structures
salivary glands	14dpi	AAEL009467	supercont1.398:92843-175641	OK	62.179	0	-1.79769e+308	-1.79769e+308	0.00102661	0.0322157		conserved hypothetical protein [Source:VB External Description;Acc:AAEL009467]	intracellular, actin binding	cytoskeleton, cell wall, cell motility and extracellular structures
salivary glands	14dpi	AAEL010799	supercont1.509:17997-43027	OK	46.8489	0	-1.79769e+308	-1.79769e+308	0.00106673	0.0319833		conserved hypothetical protein [Source:VB External Description;Acc:AAEL010799]	cell adhesion, tissue regeneration, integral to membrane	cytoskeleton, cell wall, cell motility and extracellular structures
salivary glands	14dpi	AAEL012702	supercont1.726:372100-377726	OK	74.478	1.41901	-3.96054	6.62279	3.52491e-11	1.06743e-08		ATP-binding cassette sub-family A member 3, putative [Source:VB External Description;Acc:AAEL012702]	nucleotide binding	diverse
salivary glands	14dpi	AAEL013338	supercont1.826:132448-133278	OK	7.8935	127.677	2.78346	-5.30281	1.14031e-07	1.70525e-05		lethal(2)essential for life protein, l2efl [Source:VB External Description;Acc:AAEL013338]	response to heat	diverse
salivary glands	14dpi	AAEL013390	supercont1.835:314686-344814	OK	0	14.2593	1.79769e+308	1.79769e+308	0.00103319	0.0320898		serine/threonine protein kinase [Source:VB External Description;Acc:AAEL013390]	protein phosphorylation	diverse
salivary glands	14dpi	AAEL000206	supercont1.3:2112342-2117688	OK	31.5353	0	-1.79769e+308	-1.79769e+308	0.00203206	0.048169		ninjurin A, putative [Source:VB External Description;Acc:AAEL000206]	tissue regeneration, cell adhesion, integral to membrane	diverse
salivary glands	14dpi	AAEL002267	supercont1.52:1330379-1339404	OK	63.387	0	-1.79769e+308	-1.79769e+308	0.00128245	0.0360424		conserved hypothetical protein [Source:VB External Description;Acc:AAEL002267]	regulation of cell growth, extracellular region, receptor activity	diverse
salivary glands	14dpi	AAEL011500	supercont1.585:624789-712822	OK	23.1723	0	-1.79769e+308	-1.79769e+308	0.000323779	0.0152013		Cdc42 protein, putative [Source:VB External Description;Acc:AAEL011500]	small GTPase mediated signal transduction, intracellular protein transport	diverse
salivary glands	14dpi	AAEL014896	supercont1.1328:117762-119619	OK	18.9151	0	-1.79769e+308	-1.79769e+308	0.00128355	0.0359898		conserved hypothetical protein [Source:VB External Description;Acc:AAEL014896]	signal transduction, innate immunity	diverse
salivary glands	14dpi	AAEL013441***	supercont1.846:362691-409804	OK	22.31	0.0838927	-5.58325	5.22833	1.71047e-07	2.49626e-05	TOLL9A	Toll-likeReceptor. [Source:VB External Description;Acc:AAEL013441]	signal transduction, innate immune response	immunity
salivary glands	14dpi	AAEL005293****	supercont1.150:1760205-1769111	OK	247.375	1.16898	-5.35477	5.96058	2.51341e-09	5.74432e-07	GALE8A	Galectin. [Source:VB External Description;Acc:AAEL005293]	sugar binding	immunity
salivary glands	14dpi	AAEL006699***	supercont1.217:317334-318720	OK	63.9919	5.11911	-2.52578	4.20629	2.59595e-05	0.00208243	FREP34	fibrinogen and fibronectin [Source:VB External Description;Acc:AAEL006699]	signal transduction	immunity
salivary glands	14dpi	AAEL006704***/****	supercont1.217:211370-212726	OK	778.403	76.4838	-2.32017	4.34215	1.41093e-05	0.00127542	FREP18	fibrinogen and fibronectin [Source:VB External Description;Acc:AAEL006704]	signal transduction	immunity
salivary glands	14dpi	AAEL009531***	supercont1.404:229528-233820	OK	15.4874	0	-1.79769e+308	-1.79769e+308	0.00103146	0.0322013	none	niemann-pick C1 [Source:VB External Description;Acc:AAEL009531]	cholesterol transport, integral to membrane	immunity
salivary glands	14dpi	AAEL011734	supercont1.607:396220-424177	OK	30.3831	0	-1.79769e+308	-1.79769e+308	0.00106235	0.0321706	TOLL9B	Toll-likeReceptor. [Source:VB External Description;Acc:AAEL011734]	signal transduction, innate immune response	immunity
salivary glands	14dpi	AAEL003313	supercont1.83:1261428-1280744	OK	51.6546	0.318257	-5.08948	5.83529	5.36959e-09	1.06626e-06		alkaline phosphatase [Source:VB External Description;Acc:AAEL003313]	metabolic process	metabolism
salivary glands	14dpi	AAEL000687	supercont1.14:1403087-1404860	OK	13.0308	0.158059	-4.4121	4.30879	1.64147e-05	0.00143044		glucosyl/glucuronosyl transferases [Source:VB External Description;Acc:AAEL000687]	metabolic process	metabolism
salivary glands	14dpi	AAEL012554	supercont1.711:604754-631843	OK	12.3173	0.153873	-4.38263	4.94568	7.58779e-07	9.47535e-05		maltose phosphorylase [Source:VB External Description;Acc:AAEL012554]	carbohydrate metabolic process	metabolism
salivary glands	14dpi	AAEL005977	supercont1.183:871222-950209	OK	7.44146	0.118076	-4.1435	4.07273	4.64661e-05	0.00323474		chondroitin 4-sulfotransferase [Source:VB External Description;Acc:AAEL005977]	carbohydrate biosynthetic process	metabolism
salivary glands	14dpi	AAEL012549	supercont1.710:381169-409456	OK	25.6696	0.427206	-4.09579	5.84302	5.12626e-09	1.08937e-06		ATPase, class vi, type 11c [Source:VB External Description;Acc:AAEL012549]	ATP biosynthetic process	metabolism
salivary glands	14dpi	AAEL005618	supercont1.165:344390-435540	OK	25.1268	0.424979	-4.07965	5.83696	5.3162e-09	1.07325e-06		chitin synthase [Source:VB External Description;Acc:AAEL005618]	chitin synthase activity	metabolism
salivary glands	14dpi	AAEL010099****	supercont1.453:630545-631709	OK	42.4893	0.895355	-3.85979	4.73041	2.2407e-06	0.000251311		4-nitrophenylphosphatase [Source:VB External Description;Acc:AAEL010099]	metabolic process	metabolism
salivary glands	14dpi	AAEL014541	supercont1.1156:44174-46908	OK	11.7981	0.263928	-3.80002	4.27914	1.87615e-05	0.00158922		maltose phosphorylase [Source:VB External Description;Acc:AAEL014541]	carbohydrate metabolic process	metabolism
salivary glands	14dpi	AAEL000044	supercont1.1:5118596-5120442	OK	38.374	1.14592	-3.51117	5.48323	4.17621e-08	6.74486e-06		ornithine decarboxylase [Source:VB External Description;Acc:AAEL000044]	polyamine biosynthetic process	metabolism
salivary glands	14dpi	AAEL007055	supercont1.233:488356-489477	OK	60.6229	1.99193	-3.41557	4.75693	1.9656e-06	0.000226756		lipase [Source:VB External Description;Acc:AAEL007055]	lipid metabolic process	metabolism
salivary glands	14dpi	AAEL011334	supercont1.569:286644-287394	OK	41.6018	1.53704	-3.29828	4.16706	3.08559e-05	0.00233598		conserved hypothetical protein [Source:VB External Description;Acc:AAEL011334]	chitin metabolic process	metabolism
salivary glands	14dpi	AAEL005429	supercont1.156:145549-218893	OK	9.42557	0.411067	-3.13243	4.03455	5.47078e-05	0.00368153		2-oxoglutarate dehydrogenase [Source:VB External Description;Acc:AAEL005429]	metabolic process	metabolism
salivary glands	14dpi	AAEL003831	supercont1.98:1781772-1813638	OK	34.6074	1.59715	-3.07585	4.09646	4.19513e-05	0.00298915		fatty acid hydroxylase [Source:VB External Description;Acc:AAEL003831]	fatty acid biosynthetic process	metabolism
salivary glands	14dpi	AAEL000428	supercont1.8:3404782-3430186	OK	48.7856	2.34453	-3.03535	4.67995	2.86941e-06	0.000307585		Tryptophan 2,3-dioxygenase (TDO)(EC 1.13.11.11)(Tryptophan pyrrolase)(Tryptophanase)(Tryptophan oxygenase)(TRPO)(TO)(Tryptamin 2,3-dioxygenase) [Source:VB External Description;Acc:AAEL000428]	tryptophan catabolic process	metabolism
salivary glands	14dpi	AAEL007097***	supercont1.235:1336360-1337710	OK	6.74816	214.529	3.45918	-6.58783	4.4629e-11	1.25719e-08		4-nitrophenylphosphatase [Source:VB External Description;Acc:AAEL007097]	metabolic process	metabolism
salivary glands	14dpi	AAEL008418****/*****	supercont1.323:692931-713136	OK	0	21.3915	1.79769e+308	1.79769e+308	0.00146455	0.0384818		pyrroline-5-carboxylate reductase [Source:VB External Description;Acc:AAEL008418]	proline biosynthetic process	metabolism
salivary glands	14dpi	AAEL001837	supercont1.44:2027786-2045576	OK	67.2697	0	-1.79769e+308	-1.79769e+308	0.00138314	0.0374809		lipase [Source:VB External Description;Acc:AAEL001837]	lipid metabolic process	metabolism
salivary glands	14dpi	AAEL003056	supercont1.76:2010212-2011950	OK	50.0738	0	-1.79769e+308	-1.79769e+308	0.00104733	0.0319553		brain chitinase and chia [Source:VB External Description;Acc:AAEL003056]	carbohydrate metabolic process	metabolism
salivary glands	14dpi	AAEL003066	supercont1.76:1946584-2003028	OK	174.673	0	-1.79769e+308	-1.79769e+308	0.000377716	0.0170084		brain chitinase and chia [Source:VB External Description;Acc:AAEL003066]	carbohydrate metabolic process	metabolism
salivary glands	14dpi	AAEL003298	supercont1.83:1253903-1255653	OK	76.5956	0	-1.79769e+308	-1.79769e+308	0.00148746	0.0388312		alkaline phosphatase [Source:VB External Description;Acc:AAEL003298]	metabolic process	metabolism
salivary glands	14dpi	AAEL005177*****	supercont1.145:1812683-1819913	OK	15.9564	0	-1.79769e+308	-1.79769e+308	0.000977243	0.0316507		adenylate cyclase [Source:VB External Description;Acc:AAEL005177]	cyclic nucleotide biosynthetic process	metabolism
salivary glands	14dpi	AAEL006701****/*****	supercont1.217:369825-370847	OK	19.1006	0	-1.79769e+308	-1.79769e+308	0.00167291	0.0419545		conserved hypothetical protein [Source:VB External Description;Acc:AAEL006701]	chitin metabolic process	metabolism
salivary glands	14dpi	AAEL008430	supercont1.324:1043613-1044091	OK	166.166	0	-1.79769e+308	-1.79769e+308	0.00101089	0.0320547		conserved hypothetical protein [Source:VB External Description;Acc:AAEL008430]	chitin metabolic process	metabolism
salivary glands	14dpi	AAEL017226	supercont1.417:128530-161856	OK	31.4674	0	-1.79769e+308	-1.79769e+308	0.00120303	0.0348621		carbohydrate metabolic process		metabolism
salivary glands	14dpi	AAEL001667***	supercont1.38:74106-108069	OK	106.643	1.44114	-4.30406	6.65415	2.84941e-11	8.84997e-09		multicopper oxidase [Source:VB External Description;Acc:AAEL001667]	oxidation-reduction process	oxidoreductase activity
salivary glands	14dpi	AAEL014617	supercont1.1188:32147-33821	OK	75.9462	1.99022	-3.64178	5.686	1.30051e-08	2.31663e-06		cytochrome P450 [Source:VB External Description;Acc:AAEL014617]	oxidation-reduction process	oxidoreductase activity
salivary glands	14dpi	AAEL006795	supercont1.221:299118-301167	OK	22.7922	1.01957	-3.10704	4.33537	1.45516e-05	0.00129606		cytochrome P450 [Source:VB External Description;Acc:AAEL006795]	oxidation-reduction process	oxidoreductase activity
salivary glands	14dpi	AAEL006811	supercont1.221:390697-392372	OK	75.9625	4.49817	-2.82657	5.22599	1.73225e-07	2.46855e-05		cytochrome P450 [Source:VB External Description;Acc:AAEL006811]	oxidation-reduction process	oxidoreductase activity
salivary glands	14dpi	AAEL014614	supercont1.1188:136729-138453	OK	45.7993	4.23337	-2.38127	4.36279	1.28414e-05	0.00118739		cytochrome P450 [Source:VB External Description;Acc:AAEL014614]	oxidation-reduction process	oxidoreductase activity
salivary glands	14dpi	AAEL006798***	supercont1.221:373451-375141	OK	34.8343	4.42892	-2.06245	3.84027	0.000122898	0.00698901		cytochrome P450 [Source:VB External Description;Acc:AAEL006798]	oxidation-reduction process	oxidoreductase activity
salivary glands	14dpi	AAEL003211	supercont1.82:1770082-1781392	OK	0	11.9003	1.79769e+308	1.79769e+308	0.00139642	0.0375052		beta-carotene dioxygenase [Source:VB External Description;Acc:AAEL003211]	oxidoreductase activity, acting on single donors with incorporation of molecular oxygen, incorporation of two atoms of oxygen	oxidoreductase activity
salivary glands	14dpi	AAEL006810	supercont1.221:388399-390090	OK	14.1978	0	-1.79769e+308	-1.79769e+308	0.00130642	0.036295		cytochrome P450 [Source:VB External Description;Acc:AAEL006810]	oxidation-reduction process	oxidoreductase activity
salivary glands	14dpi	AAEL010157	supercont1.457:275812-276455	OK	36.3233	0	-1.79769e+308	-1.79769e+308	0.00133232	0.0367618		microsomal glutathione s-transferase [Source:VB External Description;Acc:AAEL010157]	transferase activity	oxidoreductase activity
salivary glands	14dpi	AAEL014611	supercont1.1188:125891-127726	OK	12.5188	0	-1.79769e+308	-1.79769e+308	0.00139642	0.0374222		cytochrome P450 [Source:VB External Description;Acc:AAEL014611]	oxidation-reduction process	oxidoreductase activity
salivary glands	14dpi	AAEL000639	supercont1.13:352308-367437	OK	26.2729	1.68842	-2.74474	4.31849	1.57098e-05	0.00137894		n-acetylgalactosaminyltransferase [Source:VB External Description;Acc:AAEL000639]	Golgi apparatus, transferase activity, transferring glycosyl groups	Posttranslational modification, protein turnover, chaperones
salivary glands	14dpi	AAEL000244	supercont1.4:2830977-2851666	OK	15.1297	0	-1.79769e+308	-1.79769e+308	0.00116377	0.0339681		alpha(1,3)fucosyltransferase [Source:VB External Description;Acc:AAEL000244]	protein glycosylation, Golgi cisterna membrane	Posttranslational modification, protein turnover, chaperones
salivary glands	14dpi	AAEL007818****	supercont1.284:1063737-1064684	OK	33914.3	12.1218	-7.93658	24.4668	0	0		Trypsin 3A1 Precursor (EC 3.4.21.4) [Source:VB External Description;Acc:AAEL007818]	proteolysis	proteolysis
salivary glands	14dpi	AAEL001703****	supercont1.39:2531925-2532952	OK	7072.57	3.81199	-7.52583	13.6134	0	0		serine-type enodpeptidase, [Source:VB External Description;Acc:AAEL001703]	proteolysis	proteolysis
salivary glands	14dpi	AAEL006425****	supercont1.204:1007300-1008385	OK	2557.58	1.56949	-7.39607	6.95664	3.48477e-12	1.36165e-09		trypsin [Source:VB External Description;Acc:AAEL006425]	proteolysis	proteolysis
salivary glands	14dpi	AAEL003060	supercont1.76:108725-109783	OK	9266.15	8.22533	-7.0269	17.1292	0	0		serine-type enodpeptidase, [Source:VB External Description;Acc:AAEL003060]	proteolysis	proteolysis
salivary glands	14dpi	AAEL008781****	supercont1.348:1273196-1274190	OK	3165.89	3.8025	-6.72453	6.46838	9.9057e-11	2.44873e-08		serine-type enodpeptidase, [Source:VB External Description;Acc:AAEL008781]	proteolysis	proteolysis
salivary glands	14dpi	AAEL014188****	supercont1.1028:217404-218439	OK	6994.15	8.98539	-6.65723	16.569	0	0		serine-type enodpeptidase, [Source:VB External Description;Acc:AAEL014188]	proteolysis	proteolysis
salivary glands	14dpi	AAEL013629	supercont1.887:255441-256845	OK	304.948	0.799613	-5.94377	7.09733	1.27187e-12	5.13539e-10		trypsin-alpha, putative [Source:VB External Description;Acc:AAEL013629]	proteolysis	proteolysis
salivary glands	14dpi	AAEL008079****	supercont1.300:1112293-1113699	OK	252.905	0.844505	-5.70202	7.10224	1.22746e-12	5.31009e-10		trypsin-alpha, putative [Source:VB External Description;Acc:AAEL008079]	proteolysis	proteolysis
salivary glands	14dpi	AAEL008567	supercont1.332:1269408-1276574	OK	140.81	0.606246	-5.44788	5.76655	8.09104e-09	1.58075e-06		serine-type enodpeptidase, [Source:VB External Description;Acc:AAEL008567]	proteolysis	proteolysis
salivary glands	14dpi	AAEL008097	supercont1.300:849822-879637	OK	64.0751	1.1799	-3.99463	5.31707	1.05453e-07	1.59669e-05		trypsin-eta, putative [Source:VB External Description;Acc:AAEL008097]	proteolysis	proteolysis
salivary glands	14dpi	AAEL007926	supercont1.289:852953-868490	OK	23.5529	0.486096	-3.8806	4.62735	3.70382e-06	0.000377011		retinoid-inducible serine carboxypeptidase (serine carboxypeptidase [Source:VB External Description;Acc:AAEL007926]	proteolysis	proteolysis
salivary glands	14dpi	AAEL008080	supercont1.300:1113762-1114623	OK	60.6122	1.58333	-3.64497	4.73116	2.23241e-06	0.000252722		trypsin-eta, putative [Source:VB External Description;Acc:AAEL008080]	proteolysis	proteolysis
salivary glands	14dpi	AAEL012786	supercont1.739:217182-244449	OK	27.5085	0.886008	-3.43553	3.81219	0.000137742	0.00761859		conserved hypothetical protein [Source:VB External Description;Acc:AAEL012786]	metallopeptidase activity, proteolysis	proteolysis
salivary glands	14dpi	AAEL001863	supercont1.44:530662-532145	OK	975.771	31.5638	-3.43122	5.44884	5.06983e-08	8.08038e-06		zinc carboxypeptidase [Source:VB External Description;Acc:AAEL001863]	proteolysis	proteolysis
salivary glands	14dpi	AAEL013714*****	supercont1.901:242510-243088	OK	23.0985	0.796164	-3.36772	3.64144	0.000271118	0.0132957		trypsin, putative [Source:VB External Description;Acc:AAEL013714]	proteolysis	proteolysis
salivary glands	14dpi	AAEL008155	supercont1.304:124844-151262	OK	12.4824	0.454854	-3.3121	5.04766	4.47243e-07	5.88854e-05		protease m1 zinc metalloprotease [Source:VB External Description;Acc:AAEL008155]	proteolysis	proteolysis
salivary glands	14dpi	AAEL005808	supercont1.175:1829239-1835576	OK	8.2694	0.347935	-3.1683	3.82257	0.000132065	0.00740606		alanyl aminopeptidase [Source:VB External Description;Acc:AAEL005808]	proteolysis	proteolysis
salivary glands	14dpi	AAEL009323	supercont1.389:885957-914220	OK	34.1699	1.77682	-2.95652	4.28534	1.82461e-05	0.00155644		carbonic anhydrase precursor [Source:VB External Description;Acc:AAEL009323]	one-carbon metabolic process	proteolysis
salivary glands	14dpi	AAEL007599	supercont1.265:1279703-1280845	OK	0.955918	46.253	3.87921	-5.22662	1.72634e-07	2.48943e-05		cathepsin b [Source:VB External Description;Acc:AAEL007599]	proteolysis	immunity
salivary glands	14dpi	AAEL006563****	supercont1.210:1324312-1325830	OK	0.742582	76.7794	4.63856	-6.05923	1.36776e-09	3.18608e-07		Vitellogenic carboxypeptidase Precursor (EC 3.4.16.-) [Source:VB External Description;Acc:AAEL006563]	proteolysis	proteolysis
salivary glands	14dpi	AAEL013857****	supercont1.943:12075-13395	OK	0	14.3337	1.79769e+308	1.79769e+308	0.000555285	0.0221256		conserved hypothetical protein [Source:VB External Description;Acc:AAEL013857]	proteolysis	proteolysis
salivary glands	14dpi	AAEL003212	supercont1.82:2847310-2849701	OK	14.8638	0	-1.79769e+308	-1.79769e+308	0.00107412	0.0319676		protease m1 zinc metalloprotease [Source:VB External Description;Acc:AAEL003212]	proteolysis	proteolysis
salivary glands	14dpi	AAEL003424	supercont1.86:1100059-1101481	OK	25.3556	0	-1.79769e+308	-1.79769e+308	0.00106599	0.0320406		zinc carboxypeptidase [Source:VB External Description;Acc:AAEL003424]	proteolysis	proteolysis
salivary glands	14dpi	AAEL005821	supercont1.175:1864851-1877190	OK	20.8065	0	-1.79769e+308	-1.79769e+308	0.000933445	0.0309776		alanyl aminopeptidase [Source:VB External Description;Acc:AAEL005821]	proteolysis	proteolysis
salivary glands	14dpi	AAEL006902	supercont1.226:402832-446719	OK	38.7421	0	-1.79769e+308	-1.79769e+308	0.00103187	0.0321311		serine-type enodpeptidase, [Source:VB External Description;Acc:AAEL006902]	proteolysis	proteolysis
salivary glands	14dpi	AAEL008599	supercont1.334:643766-645310	OK	63.3878	0	-1.79769e+308	-1.79769e+308	0.00104329	0.0320746		zinc carboxypeptidase [Source:VB External Description;Acc:AAEL008599]	proteolysis	proteolysis
salivary glands	14dpi	AAEL008600	supercont1.334:645658-647390	OK	71.8067	0	-1.79769e+308	-1.79769e+308	0.00124153	0.0353852		zinc carboxypeptidase [Source:VB External Description;Acc:AAEL008600]	proteolysis	proteolysis
salivary glands	14dpi	AAEL008609	supercont1.334:621460-628042	OK	23.6363	0	-1.79769e+308	-1.79769e+308	0.00125243	0.0355285		zinc carboxypeptidase [Source:VB External Description;Acc:AAEL008609]	proteolysis	proteolysis
salivary glands	14dpi	AAEL008784	supercont1.348:324980-325973	OK	69.2046	0	-1.79769e+308	-1.79769e+308	0.000969216	0.0317301		serine-type enodpeptidase, [Source:VB External Description;Acc:AAEL008784]	proteolysis	proteolysis
salivary glands	14dpi	AAEL010776	supercont1.507:488062-489399	OK	30.751	0	-1.79769e+308	-1.79769e+308	0.00106541	0.0321029		carboxypeptidase [Source:VB External Description;Acc:AAEL010776]	proteolysis	proteolysis
salivary glands	14dpi	AAEL012776	supercont1.739:244598-262786	OK	5.67644	0	-1.79769e+308	-1.79769e+308	0.0017941	0.0440811		protease m1 zinc metalloprotease [Source:VB External Description;Acc:AAEL012776]	proteolysis	proteolysis
salivary glands	14dpi	AAEL013707	supercont1.901:264630-265832	OK	29.3947	0	-1.79769e+308	-1.79769e+308	0.00127965	0.0361313		trypsin [Source:VB External Description;Acc:AAEL013707]	proteolysis	proteolysis
salivary glands	14dpi	AAEL013899	supercont1.956:316654-326546	OK	29.0811	0	-1.79769e+308	-1.79769e+308	0.0010193	0.0321529		protease m1 zinc metalloprotease [Source:VB External Description;Acc:AAEL013899]	proteolysis	proteolysis
salivary glands	14dpi	AAEL015110	supercont1.1489:42398-49474	OK	19.9312	0	-1.79769e+308	-1.79769e+308	0.000983929	0.0317822		dipeptidyl-peptidase [Source:VB External Description;Acc:AAEL015110]	proteolysis	proteolysis
salivary glands	14dpi	AAEL014222	supercont1.1042:23649-48784	OK	0.36461	5.36475	2.68878	-4.20014	2.66747e-05	0.00209812		low-density lipoprotein receptor (ldl) [Source:VB External Description;Acc:AAEL014222]	membrane, receptor activity	signal transduction
salivary glands	14dpi	AAEL015328	supercont1.1813:7057-11942	OK	0	12.5156	1.79769e+308	1.79769e+308	0.00152302	0.0392519		hypothetical protein [Source:VB External Description;Acc:AAEL015328]	signal transduction	signal transduction
salivary glands	14dpi	AAEL002422	supercont1.56:2848177-2911796	OK	0	10.1949	1.79769e+308	1.79769e+308	0.0015275	0.0392837		cytoplasmic polyadenylation element binding protein (cpeb)		transcription and translation
salivary glands	14dpi	AAEL013760	supercont1.912:81652-128851	OK	11.818	0	-1.79769e+308	-1.79769e+308	0.00168837	0.0422545		homeobox protein nk-2 [Source:VB External Description;Acc:AAEL013760]	regulation of transcription, DNA-dependent	transcription and translation
salivary glands	14dpi	AAEL001646****	supercont1.38:660708-672699	OK	12.1829	0.0383246	-5.7617	5.4459	5.15441e-08	8.10849e-06		inward rectifier potassium channel [Source:VB External Description;Acc:AAEL001646]	transport	transport
salivary glands	14dpi	AAEL007693	supercont1.274:533594-578045	OK	26.3856	0.568745	-3.83714	5.02346	5.07486e-07	6.53955e-05		organic anion transporter [Source:VB External Description;Acc:AAEL007693]	transport	transport
salivary glands	14dpi	AAEL003970****	supercont1.102:2053504-2072852	OK	112.21	3.43119	-3.48747	5.68494	1.3086e-08	2.29726e-06		amino acid transporter [Source:VB External Description;Acc:AAEL003970]	membrane	transport
salivary glands	14dpi	AAEL015249	supercont1.1662:13072-24199	OK	45.6577	1.83392	-3.21472	5.09233	3.53696e-07	4.76035e-05		sulphate transporter [Source:VB External Description;Acc:AAEL015249]	transport	transport
salivary glands	14dpi	AAEL006372	supercont1.202:885405-968920	OK	26.0179	1.37453	-2.94067	4.86758	1.12971e-06	0.000134158		sulphate transporter [Source:VB External Description;Acc:AAEL006372]	transport	transport
salivary glands	14dpi	AAEL006126	supercont1.191:31512-47259	OK	4.53621	80.6967	2.87861	-5.73842	9.55652e-09	1.80872e-06		conserved hypothetical protein [Source:VB External Description;Acc:AAEL006126]	lipid transporter activity	transport
salivary glands	14dpi	AAEL006138****	supercont1.191:160678-167375	OK	8.43895	207.515	3.20234	-5.83943	5.23798e-09	1.09392e-06		hypothetical protein [Source:VB External Description;Acc:AAEL006138]	lipid transporter activity	transport
salivary glands	14dpi	AAEL012960****	supercont1.768:410059-421472	OK	0.801852	23.4028	3.37369	-4.75667	1.96812e-06	0.000224904		importin alpha [Source:VB External Description;Acc:AAEL012960]	protein import into nucleus	transport
salivary glands	14dpi	AAEL010434****	supercont1.477:206260-212970	OK	2.58203	86.9599	3.51687	-6.5291	6.6164e-11	1.7052e-08		Vitellogenin-A1 Precursor (VG)(PVG1) [Contains Vitellin light chain(VL);Vitellin heavy chain(VH)] [Source:VB External Description;Acc:AAEL010434]	lipid transport	transport
salivary glands	14dpi	AAEL005043	supercont1.139:1140678-1145559	OK	9.31688	0	-1.79769e+308	-1.79769e+308	0.000953863	0.0313971		ATP-dependent bile acid permease [Source:VB External Description;Acc:AAEL005043]	transport, nucleotide binding	transport
salivary glands	14dpi	AAEL008278	supercont1.310:638156-639380	OK	37.1705	0	-1.79769e+308	-1.79769e+308	0.000994628	0.0318728		conserved hypothetical protein [Source:VB External Description;Acc:AAEL008278]	transport, intracellular	transport
salivary glands	14dpi	AAEL017022	supercont1.432:712019-713264	OK	1591.08	1.16338	-7.22083	7.24102	4.45421e-13	2.15816e-10		novel protein coding		unknown
salivary glands	14dpi	AAEL004647	supercont1.125:2120973-2128142	OK	106.57	0.151614	-6.55522	6.38888	1.67108e-10	4.04836e-08		hypothetical protein [Source:VB External Description;Acc:AAEL004647]	cysteine-type endopeptidase inhibitor activity	unknown
salivary glands	14dpi	AAEL003764	supercont1.96:1096952-1097672	OK	77.8379	0.175249	-6.09618	5.71388	1.10426e-08	2.02665e-06		hypothetical protein		unknown
salivary glands	14dpi	AAEL000859	supercont1.18:904216-913165	OK	155.614	0.367647	-6.04801	6.82471	8.81029e-12	3.23391e-09		hypothetical protein		unknown
salivary glands	14dpi	AAEL005739	supercont1.172:1926147-1930191	OK	27.6361	0.125053	-5.39814	5.32316	1.01979e-07	1.56363e-05		conserved hypothetical protein [Source:VB External Description;Acc:AAEL005739]	protein binding	unknown
salivary glands	14dpi	AAEL010014	supercont1.446:955270-963629	OK	18.6236	0.0979338	-5.24789	5.83711	5.3114e-09	1.09046e-06		hypothetical protein [Source:VB External Description;Acc:AAEL010014]	cell adhesion, plasma membrane	unknown
salivary glands	14dpi	AAEL009985	supercont1.444:317178-318039	OK	2267.33	12.5485	-5.19675	6.70828	1.96929e-11	6.44703e-09		conserved hypothetical protein		unknown
salivary glands	14dpi	AAEL011551	supercont1.589:374456-413867	OK	170.515	1.43714	-4.77617	7.51121	5.86198e-14	2.95859e-11		conserved hypothetical protein		unknown
salivary glands	14dpi	AAEL013774	supercont1.918:34845-36454	OK	383.405	3.62137	-4.66224	6.89504	5.3848e-12	2.03832e-09		conserved hypothetical protein		unknown
salivary glands	14dpi	AAEL000898	supercont1.18:3023095-3035267	OK	113.03	1.21419	-4.53358	6.10662	1.01765e-09	2.41703e-07			hydrolase activity	unknown
salivary glands	14dpi	AAEL008801	supercont1.349:1148967-1153364	OK	302.637	3.72396	-4.39775	6.6038	4.00759e-11	1.184e-08		conserved hypothetical protein		unknown
salivary glands	14dpi	AAEL013775	supercont1.918:67221-68286	OK	1062.28	13.3761	-4.3747	7.22805	4.90052e-13	2.28308e-10		conserved hypothetical protein		unknown
salivary glands	14dpi	AAEL012093	supercont1.655:156251-159418	OK	12.7965	0.184825	-4.23752	4.62876	3.67858e-06	0.000377616		leucine-rich transmembrane protein [Source:VB External Description;Acc:AAEL012093]	integral to membrane	unknown
salivary glands	14dpi	AAEL007344	supercont1.249:1253959-1254452	OK	198.42	3.5453	-4.02477	5.1057	3.29564e-07	4.4854e-05		conserved hypothetical protein		unknown
salivary glands	14dpi	AAEL000294	supercont1.5:1728306-1746920	OK	174.91	3.14555	-4.01828	6.65417	2.84903e-11	9.08166e-09		conserved hypothetical protein		unknown
salivary glands	14dpi	AAEL007488	supercont1.258:1056840-1091647	OK	23.6216	0.448777	-3.96339	4.85705	1.1915e-06	0.000140123		hypothetical protein [Source:VB External Description;Acc:AAEL007488]	cell adhesion, proteolysis, membrane, plasma membrane, calcium binding	unknown
salivary glands	14dpi	AAEL005185	supercont1.145:1810655-1812668	OK	29.001	0.551112	-3.96315	4.32419	1.53093e-05	0.00135359		conserved hypothetical protein [Source:VB External Description;Acc:AAEL005185]	protein binding	unknown
salivary glands	14dpi	AAEL012506	supercont1.704:244310-246357	OK	17.7953	0.377	-3.85444	4.18234	2.8852e-05	0.00222602		conserved hypothetical protein		unknown
salivary glands	14dpi	AAEL014018****	supercont1.985:181592-304504	OK	13.6901	0.391919	-3.55337	3.83524	0.000125444	0.0071005		conserved hypothetical protein [Source:VB External Description;Acc:AAEL014018]	protein binding	unknown
salivary glands	14dpi	AAEL011180****	supercont1.548:91122-103691	OK	472.805	17.091	-3.32013	5.93599	2.92079e-09	6.55176e-07		conserved hypothetical protein		unknown
salivary glands	14dpi	AAEL017231	supercont1.556:24408-24567	OK	1743.21	64.7792	-3.2925	5.74994	8.92756e-09	1.7165e-06		novel protein coding		unknown
salivary glands	14dpi	AAEL009216	supercont1.381:1041699-1085219	OK	13.7445	0.556857	-3.20609	4.20595	2.5999e-05	0.00207188		cAMP-dependent protein kinase type ii regulatory subunit [Source:VB External Description;Acc:AAEL009216]	regulation of protein phosphorylation	unknown
salivary glands	14dpi	AAEL007342****	supercont1.249:1263557-1301580	OK	214.068	9.25125	-3.14154	5.6989	1.20585e-08	2.18007e-06		conserved hypothetical protein		unknown
salivary glands	14dpi	AAEL007758	supercont1.278:580012-582322	OK	23.6058	1.13988	-3.03057	4.27777	1.88778e-05	0.00158797		conserved hypothetical protein		unknown
salivary glands	14dpi	AAEL009476	supercont1.399:1039693-1040468	OK	67.8623	3.99702	-2.83193	4.19382	2.74295e-05	0.00212983		hypothetical protein		unknown
salivary glands	14dpi	AAEL013776	supercont1.918:206178-209076	OK	63.1708	3.7207	-2.83193	4.50365	6.67968e-06	0.000657813		predicted protein		unknown
salivary glands	14dpi	AAEL000845	supercont1.17:2807057-2812178	OK	10.437	0.622773	-2.81893	3.9762	7.00252e-05	0.00458495		protein-tyrosine phosphatase [Source:VB External Description;Acc:AAEL000845]	protein dephosphorylation	unknown
salivary glands	14dpi	AAEL005428	supercont1.155:26259-27633	OK	256.331	25.5436	-2.30608	4.53635	5.7235e-06	0.000568269		conserved hypothetical protein		unknown
salivary glands	14dpi	AAEL009508	supercont1.401:1090651-1103871	OK	0.431429	10.6354	3.20484	-4.0963	4.19803e-05	0.00295643		zinc finger protein [Source:VB External Description;Acc:AAEL009508]	intracellular, nucleic acid and zinc ion binding	unknown
salivary glands	14dpi	AAEL000776	supercont1.16:1742347-1744392	OK	1.11096	27.5743	3.21166	-4.61494	3.93209e-06	0.000396912		conserved hypothetical protein [Source:VB External Description;Acc:AAEL000776]	intracellular, protein and zinc ion binding	unknown
salivary glands	14dpi	AAEL014561	supercont1.1166:69079-69674	OK	2.56053	64.0564	3.21955	-4.68856	2.75133e-06	0.000297561		conserved hypothetical protein [Source:VB External Description;Acc:AAEL014561]	biological_process	unknown
salivary glands	14dpi	AAEL000442	supercont1.8:895164-909058	OK	2.27152	69.08	3.41482	-5.72636	1.02606e-08	1.91211e-06		conserved hypothetical protein [Source:VB External Description;Acc:AAEL000442]	hydrolase activity	unknown
salivary glands	14dpi	AAEL010097	supercont1.453:577210-587423	OK	2.84049	95.4154	3.51426	-6.60292	4.03142e-11	1.16268e-08		conserved hypothetical protein [Source:VB External Description;Acc:AAEL010097]	nucleic acid binding	unknown
salivary glands	14dpi	AAEL002652	supercont1.62:790189-805893	OK	0.695216	24.5702	3.56507	-5.11862	3.07776e-07	4.23647e-05		hypothetical protein		unknown
salivary glands	14dpi	AAEL000961	supercont1.19:468024-518508	OK	0	5.03656	1.79769e+308	1.79769e+308	0.00117936	0.0343404		conserved hypothetical protein [Source:VB External Description;Acc:AAEL000961]	protein and zinc ion binding	unknown
salivary glands	14dpi	AAEL008829	supercont1.351:880294-897799	OK	0	3.84314	1.79769e+308	1.79769e+308	0.001343	0.0369723		conserved hypothetical protein		unknown
salivary glands	14dpi	AAEL009903	supercont1.437:508146-517778	OK	0	9.0216	1.79769e+308	1.79769e+308	0.00183397	0.0448786		hypothetical protein [Source:VB External Description;Acc:AAEL009903]	regulation of transcription, DNA-dependent	unknown
salivary glands	14dpi	AAEL011252	supercont1.560:777675-778286	OK	0	44.1403	1.79769e+308	1.79769e+308	0.00185282	0.0451573		conserved hypothetical protein		unknown
salivary glands	14dpi	AAEL012228	supercont1.668:466502-468312	OK	0	39.4337	1.79769e+308	1.79769e+308	0.000991588	0.0318597		SspC, putative		unknown
salivary glands	14dpi	AAEL000406	supercont1.7:2040954-2075310	OK	12.499	0	-1.79769e+308	-1.79769e+308	0.00166124	0.0419222		conserved hypothetical protein		unknown
salivary glands	14dpi	AAEL000905	supercont1.18:2993715-2995609	OK	30.7193	0	-1.79769e+308	-1.79769e+308	0.00109205	0.0321069			hydrolase activity	unknown
salivary glands	14dpi	AAEL000915	supercont1.18:875125-877712	OK	28.4035	0	-1.79769e+308	-1.79769e+308	0.000931661	0.0310033		hypothetical protein		unknown
salivary glands	14dpi	AAEL000948	supercont1.19:2464325-2501143	OK	215.493	0	-1.79769e+308	-1.79769e+308	0.00121886	0.0350691		conserved hypothetical protein [Source:VB External Description;Acc:AAEL000948]	membrane	unknown
salivary glands	14dpi	AAEL000957	supercont1.19:2363448-2382288	OK	37.3805	0	-1.79769e+308	-1.79769e+308	0.00141981	0.0378813		hypothetical protein [Source:VB External Description;Acc:AAEL000957]	integral to membrane	unknown
salivary glands	14dpi	AAEL000967	supercont1.19:809807-829940	OK	12.6863	0	-1.79769e+308	-1.79769e+308	0.00107191	0.0319805		tmc7 protein [Source:VB External Description;Acc:AAEL000967]	integral to membrane	unknown
salivary glands	14dpi	AAEL003667	supercont1.94:1917399-1925447	OK	18.3173	0	-1.79769e+308	-1.79769e+308	8.60495e-05	0.00521159		hypothetical protein		unknown
salivary glands	14dpi	AAEL006053	supercont1.187:272717-386539	OK	89.5102	0	-1.79769e+308	-1.79769e+308	0.00120885	0.0349471		conserved hypothetical protein		unknown
salivary glands	14dpi	AAEL007478	supercont1.258:1172594-1177074	OK	19.7097	0	-1.79769e+308	-1.79769e+308	0.00096923	0.031645		conserved hypothetical protein [Source:VB External Description;Acc:AAEL007478]	homophilic cell adhesion, integral to membrane	unknown
salivary glands	14dpi	AAEL008828	supercont1.351:729863-763890	OK	8.56285	0	-1.79769e+308	-1.79769e+308	0.00213483	0.0499213		carbonic anhydrase		unknown
salivary glands	14dpi	AAEL009468	supercont1.398:175817-176336	OK	29.9296	0	-1.79769e+308	-1.79769e+308	0.00179731	0.0440706		hypothetical protein		unknown
salivary glands	14dpi	AAEL009477	supercont1.399:832380-856081	OK	11.0314	0	-1.79769e+308	-1.79769e+308	1.69532e-05	0.00145641		hypothetical protein		unknown
salivary glands	14dpi	AAEL009862	supercont1.433:453397-455221	OK	12.5281	0	-1.79769e+308	-1.79769e+308	0.00195121	0.046802		conserved hypothetical protein [Source:VB External Description;Acc:AAEL009862]	insulin-like growth factor binding, regulation of cell growth, extracellular region	unknown
salivary glands	14dpi	AAEL011980****	supercont1.639:357734-372212	OK	26.4089	0	-1.79769e+308	-1.79769e+308	0.00190965	0.0461708		hypothetical protein		unknown
salivary glands	14dpi	AAEL013083	supercont1.788:181603-183501	OK	20.827	0	-1.79769e+308	-1.79769e+308	0.00109742	0.0321867		conserved hypothetical protein [Source:VB External Description;Acc:AAEL013083]	protein binding	unknown
salivary glands	14dpi	AAEL013197	supercont1.804:162413-185261	OK	34.4185	0	-1.79769e+308	-1.79769e+308	0.00108227	0.0319745		conserved hypothetical protein [Source:VB External Description;Acc:AAEL013197]	viral capsid	unknown
*Reads coverage did not allow distinguishing between AAEL010833 and AAEL010839
** Genes previously detected as significantly differentially expressed in salivary glands of Ae. aegypti mosquitoes of the Rokefeller strain infected with DENV2 New Guinea 14dpi (Sim et al., 2012)
***Genes previously detected as differentialy expressed (Xi et al. 2008).
**** differentially expressed in salivary glands of mosquitoes the LVP strain infected with DENV2 Thailand (Luplertlop et al., 2011)
*****differentially expressed in carcass of mosquitoes of the MOYO-S or MORO-R strain 3h or 18h post infection (Behura et al., 2011)

## Sheet: Sheet1
TISSUE	TIME	ENSEMBL GENE ID	LOCUS	STATUS	FPKM_B	FPKM_DENVI	ln(fold_change)	test_stat	p_value	q_value	ImmunoDB	BIOMART DESCRIPTION	GO TERM NAME (bp)	Functional Category
carcasses	4dpi	AAEL017231	supercont1.556:24408-24567	OK	2201.69	484.529	-1.5138	7.21717	5.30909e-13	3.95695e-10		Novel protein coding		unknown
carcasses	4dpi	AAEL004503	supercont1.121:1730620-1731369	OK	1548.93	703.426	-0.789355	3.95939	7.514e-05	0.00886714		conserved hypothetical protein [Source:VB External Description;Acc:AAEL004503]	structural constituent of ribosome, translation	transcription and translation
carcasses	4dpi	AAEL003841**	supercont1.98:1444535-1444896	OK	854.999	19.6783	-3.77158	14.6174	0	0	DEFA	Defensin-A Precursor (AaDef) [Source:VB External Description;Acc:AAEL003841]	innate immune response	immunity
carcasses	4dpi	AAEL003857**	supercont1.98:1405525-1405886	OK	711.772	16.5998	-3.75837	14.3522	0	0	DEFD	Defensin,Anti-Microbial Peptide. [Source:VB External Description;Acc:AAEL003857]	defense response	immunity
carcasses	4dpi	AAEL000611	supercont1.12:758894-759144	OK	694.192	3.30458	-5.34744	15.1348	0	0	CECE	Cecropin, Anti-Microbial Peptide. [Source:VB External Description;Acc:AAEL000611]	innate immune response	immunity
carcasses	4dpi	AAEL017247	supercont1.159:1673805-1785119	OK	645.725	240.567	-0.987377	4.48973	7.13141e-06	0.0013465		Novel protein coding		unknown
carcasses	4dpi	AAEL000625	supercont1.12:780655-780906	OK	467.036	3.56533	-4.87515	13.8534	0	0	CECF	Cecropin,Anti-Microbial Peptide. [Source:VB External Description;Acc:AAEL000625]	innate immune response	immunity
carcasses	4dpi	AAEL004197	supercont1.109:1923347-1923938	OK	345.904	70.73	-1.58729	6.3781	1.793e-10	9.76563e-08		hypothetical protein		unknown
carcasses	4dpi	AAEL015515**	supercont1.2850:4343-4596	OK	313.589	0.270333	-7.05618	9.7334	0	0	CECG	Cecropin,Anti-Microbial Peptide. [Source:VB External Description;Acc:AAEL015515]	innate immune response	immunity
carcasses	4dpi	AAEL000621	supercont1.12:748023-748291	OK	295.213	2.53311	-4.75825	12.9246	0	0	CECN	Cecropin,Anti-Microbial Peptide. [Source:VB External Description;Acc:AAEL000621]	innate immune response	immunity
carcasses	4dpi	AAEL017536	supercont1.31:652166-652602	OK	293.003	827.264	1.03794	-4.92575	8.40369e-07	0.000220379		Holotricin, Glycine Rich Repreat Protein (GRRP), Anti-Microbial Peptide		immunity
carcasses	4dpi	AAEL003832**	supercont1.98:1385922-1386299	OK	258.297	4.22918	-4.1121	12.9791	0	0	DEFC	Defensin-C Precursor [Source:VB External Description;Acc:AAEL003832]	innate immune response	immunity
carcasses	4dpi	AAEL004522**	supercont1.122:2186815-2188508	OK	221.09	41.8537	-1.66439	6.38263	1.74067e-10	9.85986e-08		Gambicin,Anti-Microbial Peptide		immunity
carcasses	4dpi	AAEL006704**/***	supercont1.217:211370-212726	OK	208.121	46.9602	-1.48882	6.89836	5.26068e-12	3.54745e-09	FREP18	fibrinogen and fibronectin [Source:VB External Description;Acc:AAEL006704]	signal transduction	immunity
carcasses	4dpi	AAEL008473	supercont1.328:1045982-1047874	OK	177.339	47.3207	-1.32111	6.15316	7.59535e-10	3.70889e-07		cysteine-rich venom protein, putative [Source:VB External Description;Acc:AAEL008473]	extracellular region	unknown
carcasses	4dpi	AAEL017380	supercont1.301:684783-685342	OK	176.609	754.838	1.45256	-7.05563	1.71818e-12	1.21656e-09		Novel protein coding		unknown
carcasses	4dpi	AAEL000598	supercont1.12:767341-767585	OK	161.459	0.477054	-5.82438	10.9971	0	0	CECD	Cecropin,Anti-Microbial Peptide. [Source:VB External Description;Acc:AAEL000598]	innate immune response	immunity
carcasses	4dpi	AAEL003816	supercont1.98:1459254-1459732	OK	135.044	4.13066	-3.48716	11.5329	0	0		hypothetical protein		unknown
carcasses	4dpi	AAEL009018***	supercont1.362:639589-641207	OK	129.863	308.919	0.866598	-4.331	1.48433e-05	0.00236176		cytochrome P450 [Source:VB External Description;Acc:AAEL009018]	oxidation-reduction process	oxidoreductase activity
carcasses	4dpi	AAEL017529	supercont1.34:1086413-1087682	OK	109.664	47.2156	-0.842701	3.79263	0.000149059	0.0157524		Novel protein coding		unknown
carcasses	4dpi	AAEL003723	supercont1.95:52694-94946	OK	108.8	12.1648	-2.19096	8.13575	4.44089e-16	3.49375e-13	LYSC11	C-Type lysozyme (Lys-A), Lyzosyme activity	cell wall macromolecule catabolic process	immunity
carcasses	4dpi	AAEL010139***	supercont1.456:51589-67346	OK	99.1204	26.6109	-1.31501	5.55909	2.7119e-08	1.01061e-05		serine protease, putative [Source:VB External Description;Acc:AAEL010139]	peptidase activity	proteolysis
carcasses	4dpi	AAEL007703	supercont1.275:1333378-1403740	OK	97.4203	35.6926	-1.00409	5.33238	9.69353e-08	3.26833e-05		conserved hypothetical protein		unknown
carcasses	4dpi	AAEL001392	supercont1.31:594746-596140	OK	91.0929	2.95225	-3.42931	10.4286	0	0		hypothetical protein		unknown
carcasses	4dpi	AAEL000627	supercont1.12:755810-756064	OK	90.6856	0.147714	-6.41987	6.30498	2.8823e-10	1.51171e-07	CECA	Cecropin-A Precursor [Source:VB External Description;Acc:AAEL000627]	innate immune response	immunity
carcasses	4dpi	AAEL005641	supercont1.167:85696-86248	OK	83.6697	6.45098	-2.56264	8.67641	0	0	CTLGA5	C-Type lectin (CTL) - galactose binding. [Source:VB External Description;Acc:AAEL005641]	binding	immunity
carcasses	4dpi	AAEL008775	supercont1.348:1088454-1089543	OK	71.8756	32.599	-0.790655	3.38923	0.000700889	0.0477177		hypothetical protein		unknown
carcasses	4dpi	AAEL003843	supercont1.98:1442084-1442583	OK	60.5116	0.565257	-4.67331	10.5274	0	0		hypothetical protein		unknown
carcasses	4dpi	AAEL004481	supercont1.120:644370-646033	OK	50.1687	9.96613	-1.6162	5.8443	5.08703e-09	2.25117e-06		hypothetical protein		unknown
carcasses	4dpi	AAEL011610	supercont1.594:24298-319047	OK	39.3032	8.04556	-1.58619	5.29883	1.16548e-07	3.751e-05		CTLGA7	C-Type lectin (CTL) - galactose binding. [Source:VB External Description;Acc:AAEL011610]	immunity
carcasses	4dpi	AAEL005431	supercont1.156:1980623-1981900	OK	34.588	6.91355	-1.61002	6.05934	1.36681e-09	6.24369e-07	CLIPB37	Clip-domain serine protease, family B. [Source:VB External Description;Acc:AAEL005431]	proteolysis	immunity
carcasses	4dpi	AAEL003389	supercont1.85:2699726-2700586	OK	33.8278	0.841915	-3.69336	10.537	0	0	ATT	Attacin,Anti-Microbial Peptide. [Source:VB External Description;Acc:AAEL003389]	extracellular region	immunity
carcasses	4dpi	AAEL009219****	supercont1.381:663645-670692	OK	32.1742	7.00251	-1.5249	6.69285	2.18863e-11	1.34753e-08		predicted protein [Source:VB External Description;Acc:AAEL009219]	chitin metabolic process	metabolism
carcasses	4dpi	AAEL017514	supercont1.146:725669-726438	OK	31.94	6.08844	-1.65747	5.76765	8.03845e-09	3.34802e-06		Novel protein coding		unknown
carcasses	4dpi	AAEL007653***	supercont1.271:957702-982280	OK	31.9163	81.4138	0.936428	-4.46442	8.02858e-06	0.00140361		allantoinase [Source:VB External Description;Acc:AAEL007653]	allantoin catabolic process	metabolism
carcasses	4dpi	AAEL003050	supercont1.76:2024906-2025621	OK	30.5685	3.83585	-2.07558	6.58472	4.55744e-11	2.68908e-08		hypothetical protein		unknown
carcasses	4dpi	AAEL006971	supercont1.230:597785-599062	OK	26.6967	6.27241	-1.44838	5.31494	1.06692e-07	3.51365e-05		conserved hypothetical protein		unknown
carcasses	4dpi	AAEL003821	supercont1.98:1414682-1415176	OK	26.0506	2.11698	-2.51005	6.80386	1.01856e-11	6.5563e-09		hypothetical protein		unknown
carcasses	4dpi	AAEL007898	supercont1.288:811867-881217	OK	21.1555	9.65812	-0.784102	3.90247	9.5215e-05	0.0107867		calmin [Source:VB External Description;Acc:AAEL007898]	proteolysis, acting binding	cytoskeleton, cell wall, cell motility and extracellular structures
carcasses	4dpi	AAEL000566	supercont1.11:3870101-3871509	OK	20.3623	4.08506	-1.60635	5.104	3.32545e-07	9.23367e-05		conserved hypothetical protein		unknown
carcasses	4dpi	AAEL017284	supercont1.111:1881850-1882942	OK	19.9161	6.80091	-1.07447	3.70259	0.00021341	0.0206993		Novel protein coding		unknown
carcasses	4dpi	AAEL005324	supercont1.151:525191-569558	OK	19.1882	6.26385	-1.1195	5.56274	2.65566e-08	1.0164e-05		titin [Source:VB External Description;Acc:AAEL005324]	protein binding	cytoskeleton, cell wall, cell motility and extracellular structures
carcasses	4dpi	AAEL005752	supercont1.173:970774-974119	OK	16.1582	51.3938	1.15709	-5.40305	6.55166e-08	2.26288e-05		lysosomal alpha-mannosidase (mannosidase alpha class 2b member 1) [Source:VB External Description;Acc:AAEL005752]	carbohydrate metabolic process	metabolism
carcasses	4dpi	AAEL012017	supercont1.644:239457-239613	OK	14.1406	1.61255	-2.17123	4.17163	3.02429e-05	0.0045081		hypothetical protein		unknown
carcasses	4dpi	AAEL008050	supercont1.298:168869-170295	OK	14.0591	3.43098	-1.41042	4.75565	1.97811e-06	0.000474779		hypothetical protein [Source:VB External Description;Acc:AAEL008050]	negative regulation of translation, rRNA N-glycosylase activity	transcription and translation
carcasses	4dpi	AAEL013629	supercont1.887:255441-256845	OK	13.5785	3.3758	-1.39185	4.7348	2.19268e-06	0.000509025		trypsin-alpha, putative [Source:VB External Description;Acc:AAEL013629]	proteolysis	proteolysis
carcasses	4dpi	AAEL000374	supercont1.6:542237-543154	OK	11.9857	2.53768	-1.55246	4.44115	8.94801e-06	0.00154528		cysteine-rich venom protein, putative [Source:VB External		unknown
carcasses	4dpi	AAEL012505	supercont1.704:238623-243813	OK	9.201	2.46661	-1.31647	5.15155	2.58348e-07	7.46626e-05		hypothetical protein [Source:VB External Description;Acc:AAEL012505]	protein import, nucleic acid and protein binding, helicase activity	unknown
carcasses	4dpi	AAEL003728	supercont1.95:2048762-2071010	OK	5.95248	1.05394	-1.73128	5.43907	5.35606e-08	1.89618e-05		conserved hypothetical protein [Source:VB External Description;Acc:AAEL003728]	protein binding	unknown
carcasses	4dpi	AAEL004758	supercont1.129:423862-424869	OK	4.58601	0.476865	-2.26353	5.20384	1.95208e-07	6.00944e-05		pupal cuticle protein, putative [Source:VB External Description;Acc:AAEL004758]	structural constituent of cuticle	cytoskeleton, cell wall, cell motility and extracellular structures
carcasses	4dpi	AAEL007769	supercont1.279:1499942-1500743	OK	3.61225	0.176862	-3.01672	6.10544	1.02515e-09	4.83907e-07		hypothetical protein		unknown
carcasses	4dpi	AAEL006106	supercont1.189:2063846-2065664	OK	2.15632	0.285696	-2.02123	4.52909	5.92373e-06	0.00114912		conserved hypothetical protein [Source:VB External Description;Acc:AAEL006106]	transport, odorand binding protein	diverse
carcasses	4dpi	AAEL006138***	supercont1.191:160678-167375	OK	0.207093	6.36526	3.42544	-10.3826	0	0		hypothetical protein [Source:VB External Description;Acc:AAEL006138]	lipid transport	transport
carcasses	4dpi	AAEL013523	supercont1.863:8520-8862	OK	0.198837	7.54942	3.63674	-5.8189	5.92351e-09	2.5419e-06		hypothetical protein		unknown
carcasses	4dpi	AAEL007599	supercont1.265:1279703-1280845	OK	0.17838	2.6928	2.71442	-5.67294	1.40368e-08	5.52154e-06		cathepsin b [Source:VB External Description;Acc:AAEL007599]	proteolysis	immunity
carcasses	4dpi	AAEL013714*	supercont1.901:242510-243088	OK	0.137744	3.11628	3.119	-5.13918	2.75941e-07	7.81519e-05		trypsin, putative [Source:VB External Description;Acc:AAEL013714]	proteolysis	proteolysis
carcasses	4dpi	AAEL014561	supercont1.1166:69079-69674	OK	0.039898	2.88093	4.27954	-4.13852	3.4956e-05	0.0049011		conserved hypothetical protein [Source:VB External Description;Acc:AAEL014561]	biological_process, extracellular region	unknown
