# Supplementary material for: Complex Modulation of the Aedes aegypti Transcriptome in Response to Dengue Virus Infection
Source: PLoS One. 2012 Nov 27;7(11):e50512. doi: 10.1371/journal.pone.0050512 (PMC3507784; doi:10.1371/journal.pone.0050512)
Supplement: Table S4 — List of genes with transcripts with FPKMDENVI≥100 and accumulated at the same level or less in B mosquitoes. For the salivary glands the genes with transcripts with read coverage in DENVI mosquitoes, but not in B mosquitoes is also given; their functional attributes is reported in sheet2. The promoters, consisting of 2000 bp upstream the ATG of these genes were used an input for MEME analyses. (XLSX) [file pone.0050512.s009.xlsx]

## Sheet: Sheet1
Table S4. List of genes with transcripts with FPKMDENVI≥100 and accumulated at the same level or less in B mosquitoes. For the salivary glands the genes with exclusive read coverage in DENVI mosquitoes is also given.
Carcasses	1dpi				4dpi					14dpi					Midgut	1dpi				4dpi					14dpi					Salivary glands	14dpi				Salivary glands	14dpi
Ensembl Gene ID	FPKM_B	FPKM_DENVI	Fold Changes		Ensembl Gene ID	FPKM_B	FPKM_DENVI	Fold Changes		Ensembl Gene ID	FPKM_B	FPKM_DENVI	Fold Changes		Ensembl Gene ID	FPKM_B	FPKM_DENVI	Fold Changes		Ensembl Gene ID	FPKM_B	FPKM_DENVI	Fold Changes		Ensembl Gene ID	FPKM_B	FPKM_DENVI	Fold Changes		Ensembl Gene ID	FPKM_B	FPKM_DENVI	Fold Changes		Ensembl Gene ID	FPKM_B	FPKM_DENVI
AAEL017413	4116.86	26481.5	6.43245		AAEL009274	143.949	161.749	1.12365		AAEL009274	141.769	168.669	1.18975		AAEL017413	6611.42	44324.7	6.70426		AAEL001593	110.506	114.303	1.03436		AAEL017231	1060.23	3035.17	2.86275		AAEL007986	52007.7	105228	2.02332		AAEL015682	0	46.4759
AAEL004851	1950.71	6346.49	3.25343		AAEL002473	368.975	464.456	1.25877		AAEL002473	369.425	431.196	1.16721		AAEL007818	25296.4	30323.4	1.19872		AAEL003046	230.923	260.174	1.12667		AAEL008574	86.0602	127.306	1.47927		AAEL009081	36322.8	63043	1.73563		AAEL003673	0	45.1171
AAEL017509	49.0856	125.767	2.5622		AAEL007097	5203.92	5671.98	1.08994		AAEL007097	5219.37	6721.53	1.2878		AAEL013714	22275.6	24453.1	1.09775		AAEL007162	166.135	191.943	1.15534		AAEL007818	116441	160264	1.37635		AAEL006424	13440.7	28913.2	2.15117		AAEL011252	0	44.1403
AAEL017491	650.143	1498.58	2.305		AAEL012545	182.177	220.051	1.2079		AAEL012545	174.775	233.878	1.33817		AAEL010782	5649.65	6752.65	1.19523		AAEL000291	755.872	833.677	1.10293		AAEL017212	217.893	296.121	1.35902		AAEL000392	14388.3	26577.2	1.84714		AAEL000570	0	43.5402
AAEL009274	45.8793	104.792	2.28408		AAEL001863	127.764	152.016	1.18982		AAEL010094	633.315	744.146	1.175		AAEL004500	1403.6	1534.74	1.09343		AAEL017231	912.56	1123.26	1.23089		AAEL009076	181.856	231.957	1.2755		AAEL010235	21147	22819.5	1.07909		AAEL015515	0	43.2556
AAEL004454	74.3432	161.468	2.17193		AAEL010094	637.09	669.591	1.05101		AAEL013338	2460.03	3107.92	1.26337		AAEL014516	1414.68	1456.01	1.02922		AAEL008574	117.971	147.909	1.25377		AAEL005740	119.425	152.287	1.27517		AAEL000793	9516.46	22381.1	2.35183		AAEL017403	0	40.4256
AAEL004223	152.22	312.791	2.05486		AAEL013338	2596.61	3107.54	1.19677		AAEL017494	207.247	212.086	1.02335		AAEL010776	1078.33	1420.63	1.31744		AAEL007818	169513	196191	1.15738		AAEL007444	283.031	327.226	1.15615		AAEL009670	8130.66	20869.5	2.56677		AAEL012228	0	39.4337
AAEL002473	102.19	207.781	2.03328		AAEL017494	235.168	258.346	1.09856		AAEL013288	99.8601	126.237	1.26414		AAEL003720	664.005	990.753	1.49209		AAEL017212	235.119	316.151	1.34464		AAEL004500	3438.85	3816.22	1.10974		AAEL007776	9261.14	19707.7	2.128		AAEL017491	0	35.0145
AAEL000766	151.736	306.665	2.02104		AAEL013288	100.859	117.534	1.16533		AAEL013533	865.455	886.352	1.02415		AAEL012783	948.101	948.166	1.00007		AAEL009076	232.071	248.756	1.0719		AAEL009859	732.695	764.546	1.04347		AAEL002693	7844.46	18495.1	2.35773		AAEL001949	0	30.1085
AAEL009403	932.216	1837.89	1.97153		AAEL016994	154.446	178.882	1.15822		AAEL012427	237.687	277.806	1.16879		AAEL010169	309.903	794.299	2.56306		AAEL005740	139.592	146.08	1.04648		AAEL006372	137.537	138.438	1.00655		AAEL010228	8088.93	17753.3	2.19476		AAEL003669	0	28.9444
AAEL005220	456.467	887.257	1.94375		AAEL013533	859.091	978.342	1.13881		AAEL003552	130.685	154.309	1.18077		AAEL017231	293.513	778.203	2.65134		AAEL007444	394.083	465.571	1.1814		AAEL005524	368.163	364.405	0.989793		AAEL009524	9440.35	16826.1	1.78236		AAEL010309	0	26.2128
AAEL005085	558.733	1074.94	1.92389		AAEL012427	239.351	266.617	1.11392		AAEL004284	181.513	206.014	1.13498		AAEL012062	422.578	756.619	1.79048		AAEL004500	3150.35	3515.32	1.11585		AAEL010318	843.228	810.106	0.96072		AAEL003600	6287.36	14361	2.28411		AAEL013524	0	25.1918
AAEL015064	226.254	434.13	1.91877		AAEL003552	136.485	137.268	1.00574		AAEL012271	362.088	410.072	1.13252		AAEL000291	611.416	756.609	1.23747		AAEL009859	551.819	661.828	1.19936		AAEL010977	791.02	742.047	0.938089		AAEL012353	5584.81	14167.7	2.53683		AAEL003689	0	24.8039
AAEL003352	180.152	339.437	1.88417		AAEL006873	267.986	276.909	1.0333		AAEL000105	98.8929	131.416	1.32887		AAEL004930	395.748	684.035	1.72846		AAEL006372	254.111	259.194	1.02		AAEL007718	224.273	209.644	0.934771		AAEL006485	5742.2	13371.3	2.3286		AAEL013027	0	24.2989
AAEL005451	1381.86	2559.5	1.85221		AAEL004284	178.567	201.409	1.12792		AAEL010691	518.437	645.72	1.24551		AAEL002560	439.171	568.848	1.29528		AAEL013867	112.297	124.269	1.10661		AAEL010787	1655.22	1542.08	0.931647		AAEL004585	4705.5	13287.8	2.82389		AAEL006344	0	23.8149
AAEL007097	1568.47	2898.76	1.84815		AAEL012271	390.323	414.263	1.06133		AAEL017545	291.67	347.068	1.18993		AAEL003203	551.092	553.955	1.0052		AAEL005524	412.537	433.202	1.05009		AAEL008588	121.737	113.252	0.930301		AAEL000886	7080.05	12119.9	1.71184		AAEL013447	0	23.4414
AAEL009519	354.264	646.304	1.82436		AAEL000105	95.4631	135.997	1.4246		AAEL003427	1981.98	1990.92	1.00451		AAEL010318	266.303	547.392	2.05552		AAEL010318	1301.07	1458.75	1.12119		AAEL006922	173.711	159.518	0.918295		AAEL006417	5869.74	11411.2	1.94407		AAEL012570	0	21.9403
AAEL005213	155.312	279.693	1.80085		AAEL010691	492.133	696.963	1.41621		AAEL010798	188.762	210.745	1.11646		AAEL009310	464.049	539.842	1.16333		AAEL010977	648.439	765.712	1.18085		AAEL004195	116.659	106.297	0.911177		AAEL008305	4507.85	11239.5	2.49332		AAEL013145	0	21.6337
AAEL000529	476.762	849.256	1.7813		AAEL017545	286.199	348.575	1.21795		AAEL004484	228.214	262.514	1.1503		AAEL010145	402.233	529.887	1.31736		AAEL007718	195.663	243.712	1.24557		AAEL002539	122.142	111.249	0.910817		AAEL004597	4160.71	9059.11	2.1773		AAEL000400	0	21.4041
AAEL006542	277.813	490.057	1.76398		AAEL003427	2085.13	2185.93	1.04834		AAEL012960	287.069	312.74	1.08942		AAEL003970	321.709	465.003	1.44541		AAEL010787	1339.28	1552.62	1.15929		AAEL010059	246.808	222.569	0.90179		AAEL002704	3694.53	8865.28	2.39957		AAEL008418	0	21.3915
AAEL003685	75.0288	130.338	1.73717		AAEL010798	191.364	205.493	1.07383		AAEL000739	176.787	184.716	1.04485		AAEL003835	400.517	448.712	1.12033		AAEL008588	165.437	169.527	1.02472		AAEL003720	311.391	274.862	0.882691		AAEL006347	4535.9	8802.12	1.94055		AAEL006812	0	21.1366
AAEL001511	241.978	419.556	1.73386		AAEL004484	241.958	245.974	1.0166		AAEL017269	179.58	242.138	1.34836		AAEL012786	284.616	418.593	1.47073		AAEL006922	169.63	177.225	1.04477		AAEL005798	196.089	172.027	0.87729		AAEL008619	3078.92	8540.72	2.77393		AAEL007913	0	20.5227
AAEL003160	258.533	446.541	1.72721		AAEL012960	275.932	296.567	1.07478		AAEL009604	242.415	283.705	1.17033		AAEL012776	333.89	381.346	1.14213		AAEL004195	154.441	161.805	1.04768		AAEL003203	148.302	127.611	0.860481		AAEL007064	2964.72	8005.36	2.70021		AAEL008503	0	19.4719
AAEL007162	83.0537	143.251	1.7248		AAEL000459	205.083	219.171	1.06869		AAEL000776	433.459	520.321	1.20039		AAEL012035	226.032	359.415	1.59011		AAEL002539	106.428	130.758	1.22861		AAEL010145	779.573	667.858	0.856697		AAEL006423	2828.25	7982.91	2.82256		AAEL002523	0	18.7777
AAEL009859	179.28	309.1	1.72412		AAEL000739	173.776	184.917	1.06411		AAEL014903	769.788	786.552	1.02178		AAEL011905	256.474	355.219	1.38501		AAEL010059	213.647	246.943	1.15585		AAEL009604	125.474	107.331	0.855404		AAEL006406	4785.86	7916.97	1.65424		AAEL012173	0	18.2625
AAEL007824	1833.04	3157.74	1.72268		AAEL017269	188.773	301.009	1.59456		AAEL001666	435.384	467.259	1.07321		AAEL002280	283.639	351.268	1.23843		AAEL003720	327.521	396.382	1.21025		AAEL007391	126.102	106.437	0.844055		AAEL017119	5526.96	7841.11	1.4187		AAEL015319	0	18.151
AAEL009636	96.8051	166.484	1.71979		AAEL012359	790.293	842.653	1.06625		AAEL006243	241.209	368.193	1.52645		AAEL009076	62.1561	340.264	5.47435		AAEL005798	197.89	203.422	1.02795		AAEL000428	159.107	131.681	0.827625		AAEL010242	2077.25	7831.78	3.77026		AAEL003302	0	17.6194
AAEL012545	102.41	175.686	1.71552		AAEL009604	235.056	262.043	1.11481		AAEL008328	157.188	163.574	1.04063		AAEL003046	201.846	327.118	1.62063		AAEL003203	170.719	178.755	1.04707		AAEL004865	158.931	130.31	0.819916		AAEL003053	4318	7081.05	1.63989		AAEL010869	0	16.9964
AAEL010692	61.6342	104.636	1.69769		AAEL000776	416.481	484.609	1.16358		AAEL008849	203.277	283.041	1.39239		AAEL007162	195.574	319.907	1.63573		AAEL010145	1406.55	1450.55	1.03128		AAEL005213	167.286	134.892	0.806356		AAEL000229	3804.26	6904.38	1.81491		AAEL017191	0	16.5983
AAEL003039	91.5405	152.935	1.67068		AAEL014903	749.023	766.566	1.02342		AAEL001462	162.99	192.138	1.17883		AAEL000641	287.984	303.477	1.0538		AAEL009604	153.402	161.349	1.05181		AAEL001913	230.83	178.795	0.774574		AAEL007394	1529.34	6718.12	4.39282		AAEL000588	0	16.4794
AAEL001623	84.2414	140.487	1.66767		AAEL001666	429.876	496.71	1.15547		AAEL000999	159.725	187.019	1.17088		AAEL001656	219.641	294.885	1.34258		AAEL007391	158.877	182.889	1.15114		AAEL011905	529.649	384.058	0.725118		AAEL004522	5421.38	6075.71	1.12069		AAEL010186	0	16.0438
AAEL003659	70.5167	116.835	1.65684		AAEL006243	251.254	397.347	1.58146		AAEL006922	104.569	106.998	1.02323		AAEL008787	276.326	294.831	1.06697		AAEL000428	196.441	203.073	1.03376		AAEL012733	1939.71	2749.47	1.41746		AAEL000749	1777.45	5480.66	3.08344		AAEL008051	0	16.025
AAEL001863	231.73	383.788	1.65619		AAEL008328	149.771	171.466	1.14485		AAEL000672	204.193	270.465	1.32456		AAEL003285	265.707	284.232	1.06972		AAEL004865	129.72	147.089	1.1339		AAEL005722	3040.41	4303.37	1.41539		AAEL006719	1905.17	5430.3	2.8503		AAEL002686	0	15.6279
AAEL005097	1183.41	1954.8	1.65184		AAEL008849	203.611	269.441	1.32331		AAEL006158	414.294	467.959	1.12953		AAEL011515	113.988	271.034	2.37774		AAEL005213	287.057	337.568	1.17596		AAEL005027	1706.84	2411.08	1.4126		AAEL008310	2643.17	5386.09	2.03774		AAEL009779	0	15.5902
AAEL005471	145.905	240.79	1.65032		AAEL001462	161.868	176.764	1.09203		AAEL000269	402.197	489.433	1.2169		AAEL012684	252.329	267.316	1.05939		AAEL001913	197.705	210.959	1.06704		AAEL002639	1728.21	2431.8	1.40712		AAEL003182	2043.21	4916.86	2.40644		AAEL008169	0	15.4403
AAEL000208	61.2808	100.784	1.64463		AAEL000999	154.209	191.294	1.24049		AAEL001061	1224.23	1818.42	1.48536		AAEL005432	198.363	263.462	1.32818		AAEL011905	667.295	706.561	1.05884		AAEL013069	3131.66	4392.21	1.40252		AAEL000726	1930.63	4896.85	2.5364		AAEL000457	0	15.3913
AAEL001307	97.1965	159.505	1.64106		AAEL001420	144.124	166.871	1.15783		AAEL007609	552.404	680.25	1.23144		AAEL017212	145.152	256.028	1.76386		AAEL004699	570.328	691.939	1.21323		AAEL015006	912.165	1278.18	1.40126		AAEL007780	2512.5	4311.41	1.71598		AAEL010155	0	15.3576
AAEL000947	68.5553	112.198	1.63661		AAEL006922	104.085	108.418	1.04163		AAEL009882	140.174	199.527	1.42342		AAEL005524	199.902	249.5	1.24811		AAEL017195	471.739	490.09	1.0389		AAEL013583	874.842	1225.07	1.40033		AAEL006259	842.281	3994.85	4.74289		AAEL006645	0	15.2453
AAEL007875	68.6651	111.235	1.61996		AAEL000672	196.98	267.707	1.35906		AAEL012279	133.762	145.588	1.08841		AAEL005515	180.721	248.705	1.37618		AAEL004227	172.024	211.526	1.22963		AAEL002457	185.018	258.898	1.39931		AAEL000019	1140.75	3813.26	3.34277		AAEL001403	0	15.223
AAEL004151	1266.88	2051.6	1.61941		AAEL006158	427.421	454.7	1.06382		AAEL016982	337.199	436.916	1.29572		AAEL005517	68.7256	245.602	3.57366		AAEL012783	314.499	332.162	1.05616		AAEL011471	3526.3	4919.6	1.39512		AAEL017096	4004.15	3740.74	0.934216		AAEL017269	0	15.1824
AAEL012944	1457.5	2343.97	1.60821		AAEL000269	415.335	457.651	1.10188		AAEL008041	167.633	201.239	1.20047		AAEL010977	168.527	242.368	1.43816		AAEL014605	107.109	123.236	1.15057		AAEL003942	2553.08	3545.12	1.38857		AAEL002524	4806.4	3576.14	0.744037		AAEL013515	0	15.0933
AAEL013021	514.59	824.566	1.60237		AAEL001061	1271.27	1529.53	1.20315		AAEL005038	232.382	264.549	1.13842		AAEL013353	155.384	238.615	1.53565		AAEL005432	327.635	349.417	1.06648		AAEL000010	1922.26	2648.31	1.37771		AAEL017413	3712.94	3565.86	0.960387		AAEL009586	0	14.9332
AAEL013583	532.677	850.895	1.59739		AAEL007609	544.403	780.395	1.43349		AAEL006271	342.289	530.248	1.54912		AAEL008441	220.755	231.469	1.04853		AAEL012702	157.147	180.731	1.15008		AAEL006860	2161.58	2946.55	1.36315		AAEL000732	1436.93	3058.14	2.12825		AAEL008253	0	14.903
AAEL009275	88.6862	141.423	1.59464		AAEL009882	143.236	192.411	1.34331		AAEL000604	255.533	315.332	1.23402		AAEL001837	160.113	231.302	1.44462		AAEL011102	109.509	111.699	1.02		AAEL000068	1470.08	1997.41	1.35871		AAEL014318	1972.04	2967.4	1.50474		AAEL008926	0	14.831
AAEL000182	131.287	209.186	1.59335		AAEL012279	131.023	136.764	1.04382		AAEL013145	248.281	297.507	1.19827		AAEL002426	171.806	227.658	1.32509		AAEL012786	150.534	164.229	1.09098		AAEL007055	158.634	213.926	1.34855		AAEL000718	1430.69	2850.64	1.99249		AAEL001362	0	14.8063
AAEL014188	79.4428	126.14	1.58781		AAEL016982	336.544	464.453	1.38007		AAEL013510	381.797	440.113	1.15274		AAEL008574	215.228	223.209	1.03708		AAEL008857	124.933	126.859	1.01542		AAEL010299	2620.42	3525.21	1.34528		AAEL003601	1472.49	2761.47	1.87537		AAEL004304	0	14.8031
AAEL003492	68.0352	107.826	1.58486		AAEL008041	172.152	188.1	1.09264		AAEL013877	129.52	162.072	1.25133		AAEL010787	222.694	222.871	1.00079		AAEL006141	202.219	223.253	1.10402		AAEL002534	4125.81	5549.13	1.34498		AAEL010168	2853.51	2537.63	0.889301		AAEL009633	0	14.344
AAEL015312	1847.44	2919.14	1.5801		AAEL005038	226.087	243.586	1.0774		AAEL003924	145.21	162.418	1.1185		AAEL001840	197.25	218.164	1.10603		AAEL000417	132.919	138.358	1.04092		AAEL003550	777.029	1044.7	1.34448		AAEL005672	920.803	2506.35	2.72192		AAEL013857	0	14.3337
AAEL010094	251.073	392.853	1.5647		AAEL003396	1757	1794.65	1.02143		AAEL002861	150.558	182.014	1.20893		AAEL017322	164.648	211.904	1.28701		AAEL017322	171.129	191.856	1.12112		AAEL005129	765.6	1028.95	1.34398		AAEL002534	2571.39	2434.43	0.946737		AAEL007886	0	14.2622
AAEL015006	545.382	852.831	1.56373		AAEL006271	337.49	569.936	1.68875		AAEL004059	160.283	175.727	1.09635		AAEL008879	184.21	209.676	1.13824		AAEL007201	103.072	105.109	1.01976		AAEL008188	3671.14	4921.55	1.34061		AAEL006408	1960.54	2336.65	1.19184		AAEL013390	0	14.2593
AAEL013338	595.974	930.625	1.56152		AAEL010801	251.627	258.993	1.02927		AAEL009345	98.9463	111.493	1.1268		AAEL017334	142.108	205.855	1.44858		AAEL014847	108.975	130.307	1.19575		AAEL013021	1343.52	1048.07	0.780093		AAEL003057	937.913	2099.53	2.23851		AAEL000335	0	14.1752
AAEL013857	273.004	425.452	1.55841		AAEL000604	257.448	333.142	1.29402		AAEL001102	111.251	137.075	1.23212		AAEL005763	154.526	201.846	1.30623		AAEL003039	172.292	236.408	1.37214		AAEL008880	527.047	403.654	0.765879		AAEL008481	2303.71	2087.62	0.906199		AAEL006451	0	13.8504
AAEL006511	1257.91	1956.67	1.55549		AAEL013145	259.598	284.761	1.09693		AAEL017451	217.578	264.16	1.21409		AAEL012121	137.737	195.024	1.41592		AAEL000191	80.7626	110.966	1.37398		AAEL017558	151.145	115.15	0.761851		AAEL007699	1570.52	2087.33	1.32907		AAEL009181	0	13.7208
AAEL008503	133.524	206.753	1.54843		AAEL013510	367.162	454.344	1.23745		AAEL004468	127.634	128.236	1.00472		AAEL000417	164.561	193.99	1.17883		AAEL017447	108.93	109.277	1.00319		AAEL011551	451.991	334.059	0.739083		AAEL015294	892.55	2082.59	2.3333		AAEL014024	0	13.6911
AAEL003530	1107.52	1712.8	1.54652		AAEL013877	130.282	163.871	1.25782		AAEL003494	142.623	179.885	1.26126		AAEL005188	193.179	193.869	1.00357		AAEL012026	127.678	136.87	1.07199		AAEL009129	355.109	236.926	0.667192		AAEL016995	2660.72	2010.69	0.755694		AAEL012408	0	13.6469
AAEL011587	869.858	1342.42	1.54326		AAEL003924	139.559	167.003	1.19665		AAEL001916	197.743	256.438	1.29682		AAEL008857	185.59	193.289	1.04148		AAEL013880	155.924	202.694	1.29995		AAEL007880	243.604	155.256	0.637329		AAEL009994	2312.37	1962.27	0.848597		AAEL009177	0	13.5581
AAEL010229	102.377	157.616	1.53956		AAEL002861	153.757	158.579	1.03136		AAEL000335	229.969	273.163	1.18783		AAEL001767	83.1607	186.423	2.24172		AAEL000175	135.129	151.838	1.12365		AAEL011641	520.602	328.744	0.631469		AAEL007771	1513.1	1926.65	1.27331		AAEL007981	0	13.4496
AAEL017494	206.072	317.103	1.5388		AAEL004059	163.727	189.613	1.1581		AAEL000986	125.944	143.993	1.14331		AAEL004933	177.072	182.423	1.03022		AAEL017116	132.237	136.27	1.0305		AAEL001774	173.888	627.612	3.60929		AAEL001759	1395.05	1894.52	1.35803		AAEL009979	0	13.362
AAEL013221	1693.36	2600.78	1.53587		AAEL009345	102.895	115.257	1.12014		AAEL003210	115.481	141.56	1.22583		AAEL007758	177.72	182.093	1.02461		AAEL012092	212.536	214.107	1.00739		AAEL004088	80.1106	136.707	1.70648		AAEL017198	1246.4	1885.43	1.5127		AAEL009263	0	13.2556
AAEL013288	65.2185	100.088	1.53466		AAEL005760	176.742	178.993	1.01274		AAEL004523	127.78	142.62	1.11614		AAEL007030	161.423	179.252	1.11045		AAEL011742	174.716	200.83	1.14947		AAEL000274	82.6676	134.25	1.62397		AAEL003427	1469.54	1865.28	1.2693		AAEL011424	0	13.1621
AAEL016994	183.004	278.92	1.52412		AAEL001102	116.678	140.999	1.20845		AAEL013353	311.867	327.258	1.04935		AAEL005213	81.332	179.102	2.20211		AAEL007883	152.947	165.775	1.08387		AAEL003676	115.863	176.426	1.52271		AAEL004851	1426.81	1864.33	1.30664		AAEL011866	0	13.0508
AAEL008785	202.383	307.532	1.51955		AAEL017451	214.954	275.399	1.2812		AAEL002557	157.683	178.224	1.13027		AAEL014893	139.367	176.929	1.26952		AAEL001375	238.963	296.399	1.24036		AAEL017407	126.287	189.875	1.50352		AAEL008353	1912.49	1862.88	0.97406		AAEL014223	0	12.9808
AAEL008880	245.212	370.262	1.50997		AAEL004468	123.268	136.874	1.11038		AAEL010097	1356.69	1677.39	1.23638		AAEL004699	118.517	175.979	1.48484		AAEL010159	168.101	182.446	1.08534		AAEL005056	123.395	184.582	1.49586		AAEL004325	2188.37	1858.31	0.849175		AAEL001754	0	12.6066
AAEL010573	974.457	1464.46	1.50285		AAEL003494	139.824	163.533	1.16956		AAEL009212	246.657	256.84	1.04128		AAEL013867	167.945	175.782	1.04666		AAEL006879	302.792	303.711	1.00304		AAEL015549	97.8698	142.882	1.45992		AAEL013069	1798.96	1839.13	1.02233		AAEL017358	0	12.5534
AAEL003060	99.2241	149.082	1.50248		AAEL004423	299.331	307.629	1.02772		AAEL008657	122.753	139.136	1.13346		AAEL001913	152.377	174.139	1.14282		AAEL003954	131.656	146.036	1.10922		AAEL011498	113.096	160.133	1.4159		AAEL000987	2355.06	1826.49	0.77556		AAEL015328	0	12.5156
AAEL007585	1103.53	1651.36	1.49643		AAEL017468	144.503	162.996	1.12798		AAEL013660	227.239	228.255	1.00447		AAEL007201	157.367	172.639	1.09705		AAEL006889	250.769	290.041	1.15661		AAEL001997	140.778	198.423	1.40947		AAEL011471	2123.86	1781.5	0.838803		AAEL010692	0	12.2873
AAEL013533	437.872	654.538	1.49482		AAEL001916	203.996	273.551	1.34096		AAEL002158	387.084	414.522	1.07088		AAEL013139	156.707	172.32	1.09963		AAEL006090	124.519	136.002	1.09222		AAEL005170	78.5226	106.148	1.35181		AAEL002834	920.849	1771.07	1.9233		AAEL000555	0	12.2754
AAEL017007	104.062	155.212	1.49153		AAEL003404	518.932	671.692	1.29437		AAEL010777	366.234	432.632	1.1813		AAEL005798	160.086	169.474	1.05864		AAEL006095	122.769	130.392	1.06209		AAEL011711	177.793	238.877	1.34357		AAEL004500	1978.99	1770.99	0.894896		AAEL010282	0	11.9977
AAEL009076	146.794	218.288	1.48704		AAEL000335	220.167	233.488	1.0605		AAEL006239	299.367	361.956	1.20907		AAEL005165	158.873	163.265	1.02764		AAEL004307	102.633	103.959	1.01292		AAEL009313	290.036	386.387	1.3322		AAEL014583	2018.29	1759.4	0.871728		AAEL003211	0	11.9003
AAEL010737	74.2759	110.011	1.48111		AAEL000986	127.725	180.8	1.41554		AAEL006389	484.097	657.077	1.35733		AAEL008629	104.835	163.079	1.55558		AAEL012131	109.136	114.915	1.05295		AAEL008784	417.326	553.344	1.32593		AAEL007715	1730.41	1737.73	1.00423		AAEL006243	0	11.8718
AAEL005629	1334.29	1970.04	1.47647		AAEL003210	116.094	177.121	1.52567		AAEL009320	144.468	160.067	1.10798		AAEL001681	91.8345	159.434	1.7361		AAEL009275	108.61	115.321	1.06179		AAEL007868	169.445	214.223	1.26426		AAEL004855	2376.92	1666.04	0.700924		AAEL007443	0	11.8086
AAEL007771	2031.48	2990.02	1.47184		AAEL004523	125.829	159.722	1.26936		AAEL011424	133.065	205.941	1.54767		AAEL005172	134.217	158.211	1.17877		AAEL017315	158.068	166.371	1.05253		AAEL008567	587.839	737.001	1.25375		AAEL009852	888.867	1654.3	1.86113		AAEL013244	0	11.7753
AAEL001759	1737.57	2555.5	1.47073		AAEL013353	300.575	327.842	1.09072		AAEL008768	164.521	189.176	1.14986		AAEL000428	145.989	155.903	1.06791		AAEL000185	130.609	132.789	1.01669		AAEL013007	143.738	175.42	1.22041		AAEL009825	2012.83	1649.39	0.819438		AAEL009642	0	11.4448
AAEL014932	207.458	304.421	1.46739		AAEL002557	153.251	194.117	1.26666		AAEL014843	383.265	435.298	1.13576		AAEL001107	64.4836	155.427	2.41033		AAEL017284	99.8013	122.249	1.22492		AAEL006928	100.082	122.064	1.21964		AAEL013625	2005.47	1635.66	0.815599		AAEL005936	0	11.4048
AAEL001913	131.977	193.245	1.46423		AAEL004805	90.5417	108.803	1.20169		AAEL012357	103.629	127.865	1.23387		AAEL009604	151.13	152.504	1.00909		AAEL000713	124.599	134.564	1.07998		AAEL010823	195.291	235.374	1.20525		AAEL012736	1876.14	1625.59	0.866455		AAEL008108	0	11.2452
AAEL012427	125.631	183.305	1.45907		AAEL010097	1413.9	1687.95	1.19383		AAEL004178	203.329	211.005	1.03775		AAEL014605	140.185	151.998	1.08427		AAEL000758	105.715	111.404	1.05381		AAEL005269	178.548	208.095	1.16548		AAEL005722	1885.48	1618.2	0.858243		AAEL000537	0	11.2068
AAEL006563	3192.92	4654.93	1.45789		AAEL004987	97.723	111.124	1.13713		AAEL017179	208.83	301.19	1.44227		AAEL004227	89.9848	151.888	1.68793		AAEL012631	101.356	112.874	1.11364		AAEL011255	177.368	204.372	1.15225		AAEL009747	1644.19	1596.68	0.971104		AAEL002449	0	11.1895
AAEL003552	83.1702	120.861	1.45318		AAEL009212	242.476	258.522	1.06618		AAEL012629	113.085	151.165	1.33674		AAEL017226	131.536	150.589	1.14485		AAEL008610	112.926	138.566	1.22705		AAEL005638	137.105	156.402	1.14075		AAEL005901	1637.55	1589.16	0.97045		AAEL012540	0	11.186
AAEL010017	182.681	265.413	1.45288		AAEL008657	131.451	138.899	1.05666		AAEL002652	455.983	516.721	1.1332		AAEL003512	67.6956	148.479	2.19333		AAEL013614	94.5438	108.291	1.14541		AAEL000458	131.844	150.155	1.13888		AAEL002372	1479.68	1577.91	1.06639		AAEL005007	0	11.1174
AAEL006873	99.019	143.597	1.4502		AAEL013660	194.259	223.245	1.14921		AAEL005292	116.14	144.516	1.24433		AAEL000044	137.48	146.024	1.06215		AAEL008727,AAEL008738	131.933	152.363	1.15485		AAEL012661	150.846	171.044	1.1339		AAEL006785	1615.98	1553.77	0.961503		AAEL002486	0	11.0533
AAEL013989	140.835	203.834	1.44732		AAEL002158	387.358	404.219	1.04353		AAEL013068	193.592	216.734	1.11954		AAEL004865	93.5633	144.641	1.54592		AAEL004197	224.1	297.347	1.32685		AAEL005143	140.214	158.652	1.1315		AAEL017516	2136.66	1552.87	0.726774		AAEL011064	0	10.9379
AAEL006698	1328.74	1922.25	1.44667		AAEL010777	364.23	475.83	1.3064		AAEL004691	189.209	277.871	1.46859		AAEL006922	142.729	144.255	1.01069		AAEL017083	127.045	128.496	1.01142		AAEL005435	217.127	244.786	1.12739		AAEL002832	1678.85	1528.91	0.910689		AAEL014237	0	10.8947
AAEL017290	126.469	182.854	1.44584		AAEL009506	1683.02	1717.82	1.02068		AAEL013739	130.852	134.798	1.03016		AAEL014847	45.634	143.344	3.14117		AAEL001503	102.863	135.098	1.31338		AAEL017512	97.1837	106.512	1.09599		AAEL008103	1782.02	1495.23	0.839065		AAEL015451	0	10.8834
AAEL008843	70.1389	101.385	1.44549		AAEL008083	586.039	593.794	1.01323		AAEL007702	154.717	175.016	1.1312		AAEL008134	129.931	141.419	1.08842		AAEL017078	96.4798	100.994	1.04679		AAEL013144	184.857	201.156	1.08817		AAEL005596	889.26	1480.51	1.66488		AAEL001072	0	10.7504
AAEL011758	444.02	639.586	1.44044		AAEL006239	297.141	346.728	1.16688		AAEL011527	163.396	202.179	1.23736		AAEL009531	76.4268	140.981	1.84465		AAEL003434	140.91	172.597	1.22487		AAEL011381	129.252	137.345	1.06261		AAEL012585	1877.8	1456.19	0.775477		AAEL011233	0	10.7501
AAEL005772	454.801	654.819	1.43979		AAEL006389	457.754	750	1.63843		AAEL006879	143.018	148.861	1.04085		AAEL005001	99.5806	140.603	1.41195		AAEL008176	144.015	166.634	1.15706		AAEL001715	153.379	162.198	1.0575		AAEL014562	1520.48	1443.16	0.949148		AAEL009336	0	10.643
AAEL004116	88.9994	128.038	1.43864		AAEL009320	154.776	169.321	1.09397		AAEL006576	150.275	213.726	1.42223		AAEL003103	115.213	139.986	1.21502		AAEL009680	638.399	651.312	1.02023		AAEL013739	101.278	105.872	1.04536		AAEL006333	645.883	1437.17	2.22512		AAEL000332	0	10.5461
AAEL010821	1234.08	1770.82	1.43493		AAEL010574	153.702	156.635	1.01908		AAEL005901	1921.41	1961.98	1.02111		AAEL017195	132.829	138.931	1.04594		AAEL012578	133.696	156.994	1.17426		AAEL015512	150.636	156.755	1.04062		AAEL012686	1479.08	1432.21	0.968311		AAEL017570	0	10.4241
AAEL004284	116.052	166.277	1.43278		AAEL011424	148.74	253.421	1.70379		AAEL013458	325.689	345.204	1.05992		AAEL007444	84.3629	138.306	1.63942		AAEL009506	1733.25	2015.68	1.16295		AAEL009651	200.815	208.338	1.03746		AAEL011447	1558.95	1426.12	0.914795		AAEL010896	0	10.3614
AAEL012271	186.386	266.884	1.43189		AAEL008768	161.873	184.798	1.14162		AAEL013515	129.516	129.615	1.00076		AAEL002539	99.9928	138.231	1.38241		AAEL004369	409.648	427.225	1.04291		AAEL002160	155.606	160.689	1.03267		AAEL004899	622.815	1416.27	2.27398		AAEL001096	0	10.3163
AAEL005817	1774.87	2536.2	1.42895		AAEL014843	378.686	430.481	1.13678		AAEL007799	296.552	325.218	1.09666		AAEL017066	108.645	137.545	1.266		AAEL002811	256.37	300.04	1.17034		AAEL006115	127.176	130.036	1.02249		AAEL008188	2029.47	1407.97	0.693762		AAEL017287	0	10.2661
AAEL009964	183.979	262.466	1.42661		AAEL012357	114.391	135.504	1.18457		AAEL017066	412.861	499.671	1.21026		AAEL017551	86.8226	134.979	1.55465		AAEL008006	134.196	179.246	1.3357		AAEL009160	106.243	108.579	1.02199		AAEL006351	649.14	1394.87	2.1488		AAEL002422	0	10.1949
AAEL007718	139.533	198.929	1.42568		AAEL004855	1841.99	1871.4	1.01597		AAEL004739	120.432	126.627	1.05144		AAEL012757	132.378	133.51	1.00855		AAEL000647	706.575	739.297	1.04631		AAEL006509	179.112	181.555	1.01364		AAEL003582	1312.55	1380.87	1.05205		AAEL009106	0	10.1556
AAEL013097	668.028	949.345	1.42112		AAEL011683	146.968	153.259	1.04281		AAEL017098	1562.87	1832.98	1.17283		AAEL005760	121.545	132.838	1.09291		AAEL012736	1645.8	1926.59	1.17061		AAEL010801	158.783	157.423	0.991435		AAEL006498	364.353	1353.05	3.71357		AAEL003950	0	10.1118
AAEL009747	1872.1	2659.2	1.42044		AAEL004178	224.973	253.995	1.129		AAEL011708	267.738	309.08	1.15441		AAEL004523	117.508	132.339	1.12621		AAEL013694	1066.91	1183.98	1.10973		AAEL000454	107.871	105.455	0.977603		AAEL012733	1334.49	1345.07	1.00793		AAEL010953	0	10.0879
AAEL000105	128.582	182.545	1.41968		AAEL017179	213.554	363.389	1.70163		AAEL014845	277.035	312.444	1.12781		AAEL007718	106.66	131.297	1.23099		AAEL008083	790.599	944.792	1.19503		AAEL011514	142.154	137.498	0.967247		AAEL005817	1370.48	1325.67	0.967303		AAEL014804	0	9.9685
AAEL011090	76.6904	108.738	1.41788		AAEL012629	115.918	127.317	1.09834		AAEL000923	562.287	597.004	1.06174		AAEL015249	95.721	130.854	1.36704		AAEL014583	2285.69	2786.23	1.21899		AAEL004060	184.238	176.786	0.959552		AAEL008192	1506.98	1298.91	0.861929		AAEL008843	0	9.96637
AAEL013272	1474.94	2089.05	1.41636		AAEL002652	449.775	573.352	1.27475		AAEL013407	156.529	179.564	1.14716		AAEL012702	126.425	129.129	1.02139		AAEL003530	1055.17	1350.12	1.27953		AAEL009487	134.54	125.705	0.934332		AAEL013221	1421.85	1295.13	0.910877		AAEL014596	0	9.95871
AAEL006115	122.347	173.096	1.4148		AAEL005292	135.447	163.893	1.21002		AAEL013913	108.244	136.491	1.26096		AAEL006372	68.9912	128.349	1.86037		AAEL003060	31327.6	32162	1.02663		AAEL012964	167.393	154.328	0.92195		AAEL004175	1339.94	1281.27	0.956214		AAEL006935	0	9.81502
AAEL009637	293.706	415.159	1.41352		AAEL013068	199.802	204.299	1.02251		AAEL004112	715.833	974.838	1.36182		AAEL003349	80.8737	127.297	1.57402		AAEL002047	1500.45	1748.76	1.16549		AAEL001206	129.725	116.089	0.894885		AAEL006860	959.054	1276.02	1.3305		AAEL002617	0	9.77939
AAEL013295	72.8652	102.457	1.40612		AAEL009201	462.75	463.692	1.00204		AAEL009389	142.073	164.851	1.16033		AAEL017320	91.8333	125.709	1.36888		AAEL001577	156.874	174.208	1.1105		AAEL000804	169.324	149.812	0.884765		AAEL010095	683.433	1248.49	1.82679		AAEL017477	0	9.77155
AAEL010691	174.631	245.039	1.40318		AAEL004691	215.934	257.331	1.19171		AAEL006833	131.08	145.936	1.11334		AAEL008588	79.5018	125.664	1.58064		AAEL009341	1562.75	1852.98	1.18572		AAEL011789	126.041	110.589	0.877405		AAEL005266	1334.91	1248.32	0.935134		AAEL010257	0	9.69734
AAEL017545	146.631	205.744	1.40314		AAEL013739	134.344	137.259	1.0217		AAEL007236	213.14	248.19	1.16445		AAEL007204	88.8056	123.782	1.39385		AAEL008609	174.722	180.061	1.03056		AAEL000486	137.217	119.51	0.870956		AAEL013536	1238.81	1247.39	1.00693		AAEL005789	0	9.68447
AAEL007441	146.585	205.675	1.40311		AAEL007702	158.729	192.91	1.21534		AAEL006939	214.813	219.622	1.02239		AAEL010059	120.79	123.715	1.02422		AAEL000987	2278.9	2656.69	1.16578		AAEL001623	130.444	103.432	0.792923		AAEL003942	1189.05	1232.28	1.03636		AAEL000312	0	9.65493
AAEL004503	1297.96	1818.9	1.40135		AAEL011527	162.831	181.874	1.11695		AAEL001164	91.7873	101.397	1.1047		AAEL008461	103.169	120.696	1.16989		AAEL014562	2029.94	2358.4	1.16181		AAEL011414	170.717	133.859	0.784099		AAEL006511	1044.92	1231.6	1.17865		AAEL004172	0	9.56387
AAEL008802	192.086	268.388	1.39723		AAEL006879	147.968	149.566	1.0108		AAEL013960	107.347	116.158	1.08208		AAEL005618	89.8851	120.252	1.33784		AAEL007771	2514.75	2748.62	1.093		AAEL009964	153.583	107.172	0.697812		AAEL007420	598.071	1229.04	2.05501		AAEL010160	0	9.51828
AAEL006785	1696.63	2369.48	1.39658		AAEL001390	101.531	131.132	1.29155		AAEL011704	321.77	402.979	1.25238		AAEL013214	105.294	119.463	1.13457		AAEL017516	2085.74	2264.71	1.08581		AAEL000766	189.02	122.283	0.646932		AAEL010756	1472.12	1220.01	0.828744		AAEL008335	0	9.51375
AAEL010059	124.817	173.781	1.39229		AAEL002881	888.949	916.202	1.03066		AAEL002381	821.647	925.831	1.1268		AAEL005740	104.299	119.061	1.14154		AAEL014188	26154.3	26973.6	1.03133		AAEL005543	346.57	211.85	0.611276		AAEL009506	1610.47	1205.03	0.748247		AAEL012724	0	9.44853
AAEL009572	93.714	130.252	1.38989		AAEL006576	154.38	191.784	1.24229		AAEL004172	138.48	179.119	1.29346		AAEL003748	53.0595	118.29	2.22938		AAEL011447	1672.17	2004.22	1.19857		AAEL017247	388.97	153.319	0.394167		AAEL013272	1150.58	1197.24	1.04055		AAEL012040	0	9.4083
AAEL013069	1939.47	2693.58	1.38882		AAEL005901	1790.9	2130.44	1.18959		AAEL009387	145.274	146.088	1.0056		AAEL006141	63.0786	118.246	1.87458		AAEL000032	1808.36	2055.02	1.1364		AAEL007078	129.74	130.434	1.00535		AAEL012944	1197.53	1185.31	0.989796		AAEL010088	0	9.3918
AAEL014838	996.097	1382.8	1.38822		AAEL013458	309.122	327.769	1.06032		AAEL004586	250.399	290.738	1.1611		AAEL002963	87.3378	117.777	1.34852		AAEL008192	1453.92	1719.09	1.18238		AAEL004118	66.114	104.343	1.57823		AAEL003585	779.144	1183.71	1.51924		AAEL001358	0	9.34276
AAEL012681	301.059	416.819	1.38451		AAEL013515	155.084	195.969	1.26363		AAEL002833	477.257	545.722	1.14346		AAEL011343	78.9044	116.493	1.47638		AAEL010756	1520.45	1705.02	1.12139		AAEL006829	98.2142	127.954	1.30281		AAEL003396	1583.19	1175.94	0.742766		AAEL010249	0	9.31741
AAEL017421	99.0609	137.139	1.38439		AAEL017558	217.932	247.931	1.13765		AAEL005165	656.893	750.874	1.14307		AAEL002865	26.0168	115.966	4.45735		AAEL008353	1682.9	1936.21	1.15052		AAEL013279	94.6299	113.944	1.2041		AAEL000823	1579.02	1174.13	0.743581		AAEL017262	0	9.23552
AAEL017388	164.954	227.972	1.38203		AAEL007799	291.488	306.842	1.05267		AAEL006890	305.696	310.799	1.01669		AAEL001593	98.5095	113.66	1.1538		AAEL001488	311.334	370.088	1.18872		AAEL011980	113.288	120.93	1.06746		AAEL007824	902.91	1169.94	1.29574		AAEL011973	0	9.0734
AAEL003427	1595.98	2204.86	1.38151		AAEL017066	462.212	543.733	1.17637		AAEL009651	299.891	324.219	1.08112		AAEL004141	88.6386	113.202	1.27712		AAEL000269	563.611	620.35	1.10067		AAEL004450	98.5396	103.583	1.05118		AAEL013532	993.514	1169.81	1.17745		AAEL007323	0	9.04715
AAEL006726	102.959	141.959	1.37879		AAEL004739	125.154	140.143	1.11976		AAEL006968	257.154	311.502	1.21134		AAEL005069	97.9624	111.871	1.14198		AAEL003396	2251.72	2564.02	1.13869		AAEL007765	244.419	114.062	0.466666		AAEL003872	1329.5	1156.17	0.869628		AAEL009903	0	9.0216
AAEL008595	139.783	192.297	1.37568		AAEL003046	269.413	276.898	1.02778		AAEL010576	926.711	1112.55	1.20054		AAEL006196	98.7873	109.787	1.11135		AAEL009825	1974.02	2350.12	1.19052		AAEL002467	1001.62	412.298	0.411631		AAEL009341	1585.46	1148.03	0.724099		AAEL013659	0	8.93708
AAEL013144	130.494	179.15	1.37286		AAEL005768	146.251	179.829	1.22959		AAEL001593	267.348	342.057	1.27944		AAEL007703	91.5747	108.459	1.18438		AAEL000823	1421.45	1627.95	1.14527		AAEL012860	69.0861	136.4	1.97435		AAEL011656	1498.25	1129.54	0.753906		AAEL010156	0	8.8999
AAEL000442	870.339	1193.83	1.37168		AAEL017098	1645.21	1710.68	1.03979		AAEL010675	231.69	399.766	1.72543		AAEL010653	88.2844	108.105	1.22451		AAEL010157	93.3993	110.277	1.1807		AAEL007947	75.4611	104.064	1.37904		AAEL009993	801.299	1120.22	1.398		AAEL011222	0	8.85307
AAEL003582	1565.64	2145.01	1.37005		AAEL011708	278.469	304.308	1.09279		AAEL000274	117.96	167.784	1.42238		AAEL009859	83.9805	106.456	1.26763		AAEL006425	8959.41	11924.5	1.33095		AAEL008072	84.9815	111.18	1.30828		AAEL006698	1186.71	1103.84	0.930168		AAEL014025	0	8.84214
AAEL004388	227.548	311.236	1.36778		AAEL009078	162.64	170.976	1.05125		AAEL002595	205.904	327.163	1.58891		AAEL013047	85.0444	105.587	1.24155		AAEL005901	2433.5	2747.8	1.12916		AAEL013675	117.649	153.522	1.30492		AAEL009151	1212.65	1102.92	0.909512		AAEL008586	0	8.82308
AAEL013071	81.1861	111.028	1.36757		AAEL014845	294.732	307.307	1.04267		AAEL017447	179.366	233.977	1.30447		AAEL007391	98.4431	105.551	1.0722		AAEL010168	3051.74	3182.89	1.04298		AAEL001865	79.3178	103.183	1.30088		AAEL009496	1489.52	1100.82	0.739043		AAEL014054	0	8.8124
AAEL010798	114.578	156.676	1.36742		AAEL000923	537.055	541.608	1.00848		AAEL013141,AAEL013146	410.234	439.052	1.07025		AAEL006798	95.2379	104.727	1.09964		AAEL012585	1837.13	2089.82	1.13755		AAEL010673	107.711	136.705	1.26918		AAEL010169	123.063	1097.03	8.91438		AAEL001700	0	8.71573
AAEL006953	121.28	165.69	1.36618		AAEL013407	158.96	184.743	1.1622		AAEL017380	158.127	800.025	5.05938		AAEL017477	92.4611	103.636	1.12086		AAEL007715	1687.65	2102.23	1.24566		AAEL012980	89.0355	112.138	1.25948		AAEL008329	1217.28	1095.9	0.900286		AAEL006262	0	8.68806
AAEL012661	113.368	154.47	1.36255		AAEL013913	129.038	158.23	1.22623		AAEL015390	218.387	279.788	1.28116		AAEL012996	48.6046	102.82	2.11544		AAEL012681	408.264	460.928	1.12899		AAEL009902	85.6496	103.551	1.20901		AAEL000010	1114.38	1090.84	0.978876		AAEL000421	0	8.68006
AAEL002160	106.365	144.483	1.35837		AAEL004112	697.126	962.412	1.38054		AAEL012227	153.86	208.508	1.35518		AAEL009387	79	102.018	1.29137		AAEL013625	1870.93	2254.19	1.20485		AAEL003190	195.112	232.066	1.1894		AAEL010821	1085.31	1088.23	1.00269		AAEL004413	0	8.67442
AAEL002534	2646.87	3579.77	1.35245		AAEL005849	320.197	375.767	1.17355		AAEL012173	88.9722	125.636	1.41208		AAEL014689	81.384	102.001	1.25333		AAEL002832	1971.54	2200.54	1.11615		AAEL004071	122.575	143.281	1.16893		AAEL010299	1431.35	1074.87	0.750948		AAEL005212	0	8.64622
AAEL014292	634.592	858.062	1.35215		AAEL009389	151.053	154.245	1.02113		AAEL017315	148.478	159.108	1.07159		AAEL011102	99.0477	101.698	1.02676		AAEL005817	2232.07	2483.69	1.11273		AAEL014913	88.6024	103.265	1.16549		AAEL005097	1040.71	1065.02	1.02336		AAEL002470	0	8.64378
AAEL004484	145.089	195.508	1.3475		AAEL006833	139.261	161.683	1.16101		AAEL005931	123.443	141.222	1.14403		AAEL004195	69.2302	101.578	1.46725		AAEL005629	1921.84	2164.8	1.12642		AAEL008921	103.34	120.303	1.16415		AAEL009403	756.859	1063.75	1.40548		AAEL017429	0	8.56939
AAEL017198	2260.38	3044.86	1.34706		AAEL007236	215.332	266.126	1.23589		AAEL009508	147.212	154.735	1.0511		AAEL000427	90.6515	100.843	1.11243		AAEL008481	3115.55	3377.8	1.08417		AAEL006851	95.5946	106.7	1.11617		AAEL003107	347.434	1043.87	3.00451		AAEL000945	0	8.56271
AAEL014039	291.567	392.621	1.34659		AAEL006939	215.195	217.509	1.01075		AAEL004988	129.213	141.647	1.09623		AAEL017075	57.389	100.179	1.74561		AAEL012686	1748.59	2029.62	1.16072		AAEL004347	117.252	127.758	1.0896		AAEL002047	1590.23	1043.27	0.65605		AAEL007367	0	8.49455
AAEL008580	102.139	137.156	1.34284		AAEL010698	157.047	157.531	1.00308		AAEL002542	199.333	272.327	1.36619		AAEL014614	66.0182	100.105	1.51632		AAEL008103	2013.19	2294.29	1.13963		AAEL008946	137.056	148.418	1.0829		AAEL005629	1372.08	1039.58	0.757667		AAEL012225	0	8.47626
AAEL008329	1447.73	1942.33	1.34164		AAEL010818	330.189	354.302	1.07303		AAEL009317	161.705	184.21	1.13917							AAEL012733	1561.78	1807.92	1.1576		AAEL006946	108.429	115.663	1.06672		AAEL004151	1079.64	1028.58	0.952706		AAEL002473	0	8.43524
AAEL002081	131.231	175.971	1.34093		AAEL001164	100.638	107.088	1.06409		AAEL009287	226.798	303.621	1.33873							AAEL005722	2076.99	2353.66	1.13321		AAEL014943	99.0884	104.795	1.05759		AAEL000032	1895.68	1020.51	0.538335		AAEL003755	0	8.37763
AAEL006480	100.557	134.792	1.34045		AAEL013960	106.089	153.226	1.44432		AAEL012827	187.637	229.302	1.22205							AAEL005027	971.109	1237.05	1.27385		AAEL003313	212.002	243.101	1.14669		AAEL002639	1003.95	1004.19	1.00024		AAEL010034	0	8.32441
AAEL012960	174.664	233.89	1.33909		AAEL006834	109.18	158.057	1.44767		AAEL010765	305.329	308.289	1.00969							AAEL002639	1132.98	1332.92	1.17647		AAEL008600	203.714	232.863	1.14309		AAEL007872	643.604	982.251	1.52617		AAEL005732	0	8.2376
AAEL005457	75.3366	100.685	1.33647		AAEL011704	317.054	358.175	1.1297		AAEL010340	148.215	203.825	1.3752							AAEL013069	2245.34	2713.57	1.20853		AAEL005536	351.925	400.893	1.13914		AAEL005451	906.791	959.142	1.05773		AAEL008170	0	8.1884
AAEL004325	2018.48	2693.59	1.33446		AAEL007818	178.355	397.517	2.2288		AAEL005951	179.313	220.619	1.23036							AAEL015006	686.384	777.448	1.13267		AAEL003393	392.077	443.053	1.13002		AAEL009992	757.117	924.498	1.22108		AAEL000435	0	8.16869
AAEL000459	133.624	177.84	1.3309		AAEL009955	162.321	162.534	1.00131		AAEL000109	316.977	348.938	1.10083							AAEL013583	684.705	772.947	1.12888		AAEL005868	203.359	229.542	1.12875		AAEL000748	608.032	909.877	1.49643		AAEL013013	0	8.15631
AAEL009151	1409.12	1874.42	1.33021		AAEL003234	439.53	469.21	1.06753		AAEL000099	132.419	182.774	1.38027							AAEL002457	355.471	403.193	1.13425		AAEL007385	565.466	636.856	1.12625		AAEL007962	488.271	891.888	1.82662		AAEL011330	0	8.09934
AAEL003872	1062.97	1411.09	1.3275		AAEL002381	768.619	787.893	1.02508		AAEL013675	151.122	165.756	1.09684							AAEL011471	2269.33	2567.14	1.13123		AAEL011296	757.331	852.378	1.1255		AAEL005270	358.394	883.146	2.46418		AAEL014014	0	8.09127
AAEL005312	176.636	234.295	1.32643		AAEL004172	132.633	198.158	1.49403		AAEL017349	358.583	411.719	1.14818							AAEL003942	1729.55	2011.07	1.16277		AAEL005610	252.711	281.255	1.11295		AAEL004873	449.675	879.749	1.95641		AAEL008580	0	8.08797
AAEL011255	79.8065	105.844	1.32626		AAEL009387	142.415	168.827	1.18546		AAEL003993	124.186	133.078	1.0716							AAEL000010	1181.87	1385.71	1.17247		AAEL011773	131.516	145.886	1.10926		AAEL013158	885.802	879.5	0.992886		AAEL002549	0	8.06965
AAEL011656	2013.81	2670.54	1.32611		AAEL004586	243.618	260.693	1.07009		AAEL002510	162.423	163.855	1.00882							AAEL006860	1350.89	1622.88	1.20134		AAEL007752	238.731	263.462	1.10359		AAEL011195	870.396	840.532	0.965689		AAEL012149	0	7.97315
AAEL013844	77.1416	102.296	1.32608		AAEL002833	492.253	525.904	1.06836		AAEL017345	118.413	200.55	1.69365							AAEL000068	1057.8	1192.78	1.1276		AAEL007777	184.009	202.527	1.10064		AAEL009653	982.297	824.56	0.83942		AAEL003551	0	7.93619
AAEL005027	1014.33	1345.05	1.32605		AAEL005165	639.969	730.182	1.14096		AAEL010668	192.575	193.646	1.00556							AAEL007055	253.007	293.682	1.16077		AAEL007349	540.795	592.759	1.09609		AAEL000641	481.565	810.221	1.68247		AAEL009206	0	7.91462
AAEL003193	109.572	144.907	1.32248		AAEL003835	885.584	957.906	1.08167		AAEL007962	473.965	514.591	1.08572							AAEL010299	2099.76	2454.06	1.16873		AAEL003675	236.831	258.171	1.09011		AAEL013694	1037.63	784.68	0.756223		AAEL000533	0	7.81682
AAEL000739	105.425	139.413	1.32239		AAEL006890	291.558	323.938	1.11106		AAEL005069	154.705	191.404	1.23722							AAEL002534	3333.94	3837.92	1.15117		AAEL009985	4962.63	5299.45	1.06787		AAEL010318	870.532	771.16	0.885849		AAEL006949	0	7.80518
AAEL017269	91.606	120.536	1.31581		AAEL002851	843.8	890.353	1.05517		AAEL005056	106.719	116.504	1.09169							AAEL003550	971.162	1020.74	1.05105		AAEL009201	350.236	373.803	1.06729		AAEL010573	811.614	756.747	0.932398		AAEL001282	0	7.77947
AAEL006860	1728.09	2273.02	1.31534		AAEL006256	689.436	778.216	1.12877		AAEL005528	174.007	180.556	1.03764							AAEL005129	360.527	438.147	1.2153		AAEL002495	10204.2	10799.9	1.05838		AAEL002656	278.374	740.284	2.65931		AAEL005514	0	7.71409
AAEL012359	601.706	790.452	1.31368		AAEL009651	309.257	375.2	1.21323		AAEL010169	66.7211	1401.57	21.0064							AAEL008188	2833.29	3201.78	1.13006		AAEL008430	710.324	743.705	1.04699		AAEL000068	833.328	740.071	0.888091		AAEL012953	0	7.59858
AAEL012686	1785.66	2336.59	1.30853		AAEL006968	260.468	288.238	1.10662		AAEL012817	180.878	199.337	1.10205							AAEL013536	1696.39	1822.16	1.07414		AAEL013623	516.124	538.865	1.04406		AAEL005027	860.015	736.153	0.855977		AAEL006497	0	7.59262
AAEL001896	91.9376	120.256	1.30802		AAEL010576	914.596	1059.58	1.15852		AAEL000703	198.243	216.252	1.09084							AAEL007962	655.822	749.499	1.14284		AAEL002881	293.413	305.857	1.04241		AAEL003530	1029.96	728.78	0.707581		AAEL006046	0	7.55904
AAEL008789	87.4676	114.325	1.30706		AAEL001593	277.052	419.104	1.51273		AAEL005740	131.227	134.007	1.02118							AAEL011656	2583.86	3002.77	1.16213		AAEL003986	166.957	173.792	1.04094		AAEL005332	297.618	725.915	2.43908		AAEL001259	0	7.38622
AAEL010299	1494.12	1951.05	1.30582		AAEL010675	259.678	579.916	2.23321		AAEL010467	177.986	188.046	1.05652							AAEL013221	2407.96	2794.12	1.16037		AAEL007065	269.794	279.376	1.03552		AAEL004503	881.885	707.981	0.802804		AAEL006894	0	7.35325
AAEL010977	293.473	382.701	1.30404		AAEL000274	124.931	142.68	1.14207		AAEL003303	270.058	353.776	1.31							AAEL013158	1297.28	1466.47	1.13042		AAEL001779	149.823	154.938	1.03414		AAEL004149	637.067	696.277	1.09294		AAEL001909	0	7.34831
AAEL009604	137.238	178.823	1.30301		AAEL004457	324.289	387.109	1.19372		AAEL017536	248.346	1143.76	4.60551							AAEL004175	1839.46	2070.27	1.12548		AAEL000948	404.911	418.144	1.03268		AAEL004521	324.369	671.655	2.07065		AAEL011911	0	7.33195
AAEL002737	218.079	283.693	1.30087		AAEL002595	207.874	238.018	1.14501		AAEL004976	146.751	207.905	1.41672							AAEL009496	1831.28	2033.8	1.11059		AAEL003899	172.617	178.073	1.03161		AAEL010893	357.078	670.658	1.87818		AAEL000731	0	7.30324
AAEL001216	208.959	270.298	1.29355		AAEL017447	178.458	263.276	1.47528		AAEL004492	107.789	134.666	1.24935							AAEL007699	2368.82	2585.58	1.09151		AAEL010765	245.662	252.898	1.02946		AAEL013359	748.697	668.724	0.893184		AAEL008137	0	7.29315
AAEL005266	1529.77	1977.87	1.29292		AAEL013141,AAEL013146	415.773	423.519	1.01863		AAEL008137	97.5356	126.23	1.29419							AAEL009842	359.718	381.928	1.06174		AAEL004284	156.955	160.515	1.02268		AAEL014838	767.48	666.037	0.867823		AAEL001136	0	7.29261
AAEL001402	140.138	181.041	1.29188		AAEL017380	176.609	754.838	4.27406		AAEL006177	107.3	128.183	1.19462							AAEL007383	585.466	611.249	1.04404		AAEL003492	155.246	157.887	1.01701		AAEL000931	353.255	659.874	1.86798		AAEL017501	0	7.25869
AAEL015143	126.249	163.08	1.29173		AAEL015390	234.347	335.463	1.43148		AAEL010155	197.364	284.813	1.44308							AAEL011734	166.915	167.524	1.00365		AAEL007342	495.693	502.261	1.01325		AAEL014903	617.019	619.888	1.00465		AAEL007327	0	7.25129
AAEL011478	144.495	186.416	1.29012		AAEL012227	148.357	205.964	1.3883		AAEL008575	105.193	115.957	1.10233							AAEL011588	115.253	115.587	1.0029		AAEL001863	2864.89	2902.14	1.013		AAEL011587	665.232	609.323	0.915956		AAEL013734	0	7.22289
AAEL014238	143.002	183.889	1.28592		AAEL012173	90.3881	170.484	1.88613		AAEL010766	122.953	142.153	1.15616							AAEL007490	213.643	229.049	1.07211		AAEL006007	2382.66	2405.75	1.00969		AAEL000541	322.043	602.088	1.86959		AAEL000218	0	7.21743
AAEL008431	120.347	154.25	1.28171		AAEL017315	155.487	167.959	1.08021		AAEL014128	462.882	483.261	1.04403							AAEL006698	1668.11	1850.18	1.10915		AAEL011025	146.01	146.166	1.00107		AAEL008441	290.802	578.574	1.98958		AAEL007086	0	7.1797
AAEL000776	213.809	273.65	1.27988		AAEL012035	161.259	170.66	1.0583		AAEL004152	86.1339	102.585	1.19099							AAEL010573	1162.88	1356.22	1.16626		AAEL009214	337.045	337.037	0.999976		AAEL013021	526.377	572.66	1.08793		AAEL010832	0	7.09972
AAEL014943	188.664	241.341	1.27921		AAEL005931	125.645	132.63	1.05559		AAEL005890	93.4029	132.354	1.41702							AAEL009101	237.593	272.213	1.14571		AAEL004798	5228.99	5228.85	0.999973		AAEL012827	300.557	571.655	1.90199		AAEL017401	0	7.08626
AAEL014903	798.654	1020.82	1.27818		AAEL009508	140.098	190.825	1.36208		AAEL008182	133.553	197.676	1.48013							AAEL008329	1431.79	1659.04	1.15872		AAEL002267	220.094	219.902	0.999128		AAEL013097	551.275	569.44	1.03295		AAEL003502	0	7.06886
AAEL011447	1806.22	2297.62	1.27206		AAEL004988	128.425	138.975	1.08215		AAEL009263	201.536	259.878	1.28949							AAEL009994	2665.87	2912	1.09233		AAEL005331	418.813	415.632	0.992405		AAEL014292	467.846	568.491	1.21512		AAEL008595	0	6.99284
AAEL000951	559.337	711.366	1.2718		AAEL013876	98.664	116.09	1.17662		AAEL000670	77.4364	146.712	1.89461							AAEL013899	151.173	158.244	1.04677		AAEL012359	545.171	540.422	0.991289		AAEL008766	432.481	566.537	1.30997		AAEL000943	0	6.96781
AAEL001666	190.827	242.387	1.27019		AAEL002542	211.238	259.692	1.22938		AAEL012499	213.027	294.797	1.38385							AAEL013272	1774.22	2001.76	1.12825		AAEL012113	235.59	232.035	0.98491		AAEL011197	1275.1	563.853	0.442203		AAEL007768	0	6.96548
AAEL006243	106.373	134.994	1.26906		AAEL010754	357.656	389.073	1.08784		AAEL002337	81.3534	105.47	1.29644							AAEL003427	3194.82	3198.98	1.0013		AAEL013885	3425.22	3368.7	0.983499		AAEL003889	309.901	563.475	1.81824		AAEL012868	0	6.96227
AAEL003903	81.8845	103.877	1.26858		AAEL009317	167.597	173.96	1.03797		AAEL013305	102.075	139.812	1.3697							AAEL005266	1974.78	2057.82	1.04205		AAEL006885	527.296	516.347	0.979236		AAEL003584	397.544	561.332	1.412		AAEL010637	0	6.92037
AAEL008328	106.645	135.28	1.26851		AAEL009287	243.725	323.997	1.32935		AAEL002406	118.356	245.362	2.07308							AAEL002372	1924.91	2067.1	1.07387		AAEL003234	356.833	348.575	0.976858		AAEL008083	787.303	558.021	0.708775		AAEL000739	0	6.89755
AAEL007699	2190.04	2776.48	1.26778		AAEL012827	201.059	207.094	1.03002		AAEL014055	104.405	149.868	1.43545							AAEL004855	3732.04	4118.41	1.10353		AAEL008085	1100.34	1069.62	0.972081		AAEL017349	349.7	551.793	1.5779		AAEL011533	0	6.88433
AAEL008849	136.699	173.139	1.26657		AAEL010765	293.81	355.007	1.20829		AAEL003312	79.3997	245.596	3.09316							AAEL014838	1408.12	1470.85	1.04455		AAEL013775	3861.51	3723.9	0.964364		AAEL006007	809.538	542.952	0.670694		AAEL011852	0	6.83328
AAEL012094	117.751	148.215	1.25872		AAEL010340	136.357	223.351	1.63799		AAEL009772	103.158	119.959	1.16287							AAEL008697	145.024	151.717	1.04615		AAEL006642	557.593	535.168	0.959782		AAEL006096	289.753	541.383	1.86843		AAEL010270	0	6.75154
AAEL001462	101.276	127.453	1.25847		AAEL005951	169.31	286.115	1.68989		AAEL004438	112.101	142.013	1.26683							AAEL009747	2228.24	2418.19	1.08525		AAEL002827	323.756	309.555	0.956137		AAEL010787	706.756	538.945	0.762562		AAEL006079	0	6.72783
AAEL007787	88.5278	111.38	1.25814		AAEL012740	953.48	972.018	1.01944		AAEL001496	107.442	112.465	1.04675							AAEL000951	550.804	607.335	1.10263		AAEL013774	1186.11	1127.82	0.950856		AAEL000657	259.776	535.376	2.06091		AAEL014126	0	6.72641
AAEL003497	87.6795	110.245	1.25736		AAEL006575	211.917	231.087	1.09046		AAEL007017	84.2696	104.745	1.24297							AAEL014903	853.942	1096.54	1.28409		AAEL002309	517.371	483.362	0.934266		AAEL006642	475.615	519.072	1.09137		AAEL011838	0	6.70785
AAEL012216	1050.38	1319.11	1.25584		AAEL000109	304.489	314.231	1.03199		AAEL014980	80.9972	116.336	1.4363							AAEL007824	2327.27	2778.3	1.1938		AAEL009185	309.619	285.182	0.921074		AAEL012423	525.888	497.505	0.946028		AAEL001908	0	6.69052
AAEL000999	84.6649	106.264	1.25511		AAEL005143	171.346	210.847	1.23053		AAEL013538	137.41	160.636	1.16903							AAEL012944	2185.32	2481.95	1.13574		AAEL002578	825.644	760.147	0.920672		AAEL013583	455.793	491.941	1.07931		AAEL015383	0	6.62097
AAEL003849	150.785	189.194	1.25473		AAEL000099	125.195	158.45	1.26563		AAEL006713	116.379	153.896	1.32237							AAEL001759	2251.63	2481.59	1.10213		AAEL005471	125.484	115.481	0.920285		AAEL015006	459.213	483.593	1.05309		AAEL009361	0	6.57431
AAEL000068	934.547	1171.18	1.25321		AAEL013675	147.988	155.163	1.04848		AAEL010002	95.8805	110.057	1.14786							AAEL010754	385.519	413.382	1.07227		AAEL017419	362.156	332.099	0.917005		AAEL005331	277.552	481.071	1.73326		AAEL002908	0	6.55599
AAEL010168	2665.14	3335.34	1.25147		AAEL006885	436.474	516.58	1.18353		AAEL003624	140.278	167.831	1.19642							AAEL011587	1298.18	1365.87	1.05214		AAEL004616	311.67	284.997	0.914419		AAEL008785	248.102	478.879	1.93017		AAEL001369	0	6.54527
AAEL001052	120.748	150.977	1.25035		AAEL013880	177.899	198.931	1.11822		AAEL000218	114.266	210.572	1.84282							AAEL010821	1506.64	1721.66	1.14271		AAEL017481	216.946	198.268	0.913905		AAEL010818	552.54	478.041	0.86517		AAEL013168	0	6.52257
AAEL007945	177.36	221.549	1.24915		AAEL011381	187.181	188.331	1.00614		AAEL006728	101.196	122.226	1.20781							AAEL009653	856.681	950.351	1.10934		AAEL012819	120.546	109.696	0.909993		AAEL005013	324.842	476.872	1.46801		AAEL001229	0	6.51425
AAEL009101	247.244	308.73	1.24869		AAEL017349	365.569	410.821	1.12379		AAEL004467	115.907	128.618	1.10967							AAEL003582	1837.94	2139.71	1.16419		AAEL017087	121.455	110.137	0.906813		AAEL002309	344.191	468.251	1.36044		AAEL013397	0	6.50817
AAEL003986	180.654	225.291	1.24709		AAEL007065	353.122	358.139	1.01421		AAEL007701	117.889	142.609	1.20969							AAEL014944	361.439	362.145	1.00195		AAEL011542	1417.25	1275.31	0.899848		AAEL007385	416.61	466.525	1.11981		AAEL000974,AAEL000980	0	6.34615
AAEL001420	163.087	203.231	1.24615		AAEL003993	125.011	133.768	1.07005		AAEL007184	96.623	100.593	1.04109							AAEL016995	4488.05	4835.78	1.07748		AAEL002411	234.156	207.845	0.887635		AAEL000951	458.236	463.071	1.01055		AAEL013452	0	6.32845
AAEL009313	281.147	348.95	1.24117		AAEL002510	165.225	181.857	1.10066		AAEL004920	101.059	106.852	1.05732							AAEL016984	343.573	364.589	1.06117		AAEL005401	1060.04	939.734	0.886508		AAEL001061	249.415	461.443	1.8501		AAEL008621	0	6.32239
AAEL002372	2170.5	2693.74	1.24107		AAEL002764	118.972	119.198	1.0019		AAEL010644	137.257	172.088	1.25376							AAEL014292	826.956	828.756	1.00218		AAEL002851	142.387	123.217	0.865367		AAEL003100	237.658	457.299	1.92419		AAEL007149	0	6.29297
AAEL006922	90.2927	111.766	1.23782		AAEL017345	120.818	130.384	1.07918		AAEL010912	124.245	128.025	1.03042							AAEL000294	827.594	864.406	1.04448		AAEL003957	466.633	402.41	0.862369		AAEL011288	522.194	456.08	0.873392		AAEL014996	0	6.28976
AAEL002920	380.64	470.643	1.23645		AAEL010668	179.334	198.664	1.10779		AAEL012234	97.5938	105.708	1.08314							AAEL004503	980.934	1164.82	1.18746		AAEL009760	1609.7	1376.2	0.854942		AAEL012175	487.335	445.973	0.915126		AAEL009090	0	6.27545
AAEL007599	2651.28	3270.32	1.23349		AAEL003345	239.643	271.841	1.13436		AAEL006889	90.844	108.113	1.1901							AAEL004325	2736.25	2924.61	1.06884		AAEL004423	279.43	234.864	0.840511		AAEL013533	604.159	440.701	0.729445		AAEL004396	0	6.27441
AAEL002993	131.031	161.61	1.23337		AAEL007962	457.336	488.695	1.06857		AAEL003686	92.8698	135.851	1.46281							AAEL013533	967.489	1129.32	1.16727		AAEL006702	129.75	107.07	0.825202		AAEL011302	257.205	432.517	1.6816		AAEL008182	0	6.2554
AAEL002841	100.383	123.743	1.23271		AAEL005069	154.725	201.972	1.30536		AAEL014296	104.594	116.39	1.11278							AAEL017198	2264.07	2694.92	1.1903		AAEL010464	217.851	178.386	0.818844		AAEL005085	368.284	429.866	1.16721		AAEL012018	0	6.24958
AAEL000672	109.004	134.334	1.23238		AAEL005056	101.141	124.522	1.23117		AAEL009400	136.431	172.434	1.26389							AAEL006511	2007.89	2201.19	1.09627		AAEL009219	1224.17	999.485	0.816459		AAEL010777	176.829	422.209	2.38767		AAEL009675	0	6.19656
AAEL008188	2231.08	2740.77	1.22845		AAEL005528	168.216	182.9	1.08729		AAEL013390	132.42	149.534	1.12924							AAEL002158	224.686	226.471	1.00794		AAEL011180	1574.42	1269.09	0.806068		AAEL000529	354.308	418.411	1.18092		AAEL008255	0	6.13027
AAEL013536	1517.84	1863.97	1.22804		AAEL003734	233.01	239.258	1.02681		AAEL009142	104.845	120.388	1.14825							AAEL004151	2036.62	2274.39	1.11675		AAEL006158	247.565	196.343	0.793097		AAEL012684	344.62	417.527	1.21156		AAEL001686	0	6.12945
AAEL014562	1727.62	2121.17	1.2278		AAEL002956	118.456	126.122	1.06472		AAEL001606	102.099	105.478	1.0331							AAEL003298	438.667	464.693	1.05933		AAEL002761	146.912	116.271	0.791433		AAEL012359	291.763	407.16	1.39552		AAEL007879	0	6.11085
AAEL007777	89.472	109.583	1.22477		AAEL005991	149.923	151.138	1.0081		AAEL015575	89.2204	102.477	1.14858							AAEL012778	262.341	358.761	1.36754		AAEL006390	132.891	104.156	0.78377		AAEL009314	144.343	403.504	2.79545		AAEL010943	0	6.08266
AAEL006158	312.31	381.834	1.22261		AAEL010169	194.237	1701.11	8.75791		AAEL017081	77.9006	103.297	1.32601							AAEL013097	717.657	879.538	1.22557		AAEL001998	428.5	333.275	0.777771		AAEL005032	168.129	401.954	2.39075		AAEL007422	0	6.06916
AAEL000269	250.332	305.662	1.22103		AAEL012817	181.501	230.343	1.2691		AAEL004148	124.158	141.735	1.14157							AAEL007494	191.605	216.149	1.1281		AAEL009244	1553.62	1200.94	0.772995		AAEL011773	293.373	397.902	1.3563		AAEL011119	0	6.01842
AAEL012243	88.7253	107.907	1.21619		AAEL017258	184.256	228.576	1.24053		AAEL012095	85.888	106.814	1.24364							AAEL009151	1907.02	2177.45	1.14181		AAEL009467	255.176	196.996	0.772001		AAEL006102	277.557	389.028	1.40161		AAEL012929	0	6.01673
AAEL011498	157.755	191.857	1.21617		AAEL017286	175.988	215.071	1.22208		AAEL005904	105.928	127.048	1.19938							AAEL006785	2299.49	2454.7	1.0675		AAEL017494	229.493	176.695	0.769936		AAEL012681	336.452	388.236	1.15391		AAEL001455	0	5.99951
AAEL003285	177.65	215.993	1.21583		AAEL000703	194.489	209.597	1.07768		AAEL004421	94.8205	100.563	1.06056							AAEL008166	195.826	214.986	1.09784		AAEL006793	241.181	183.179	0.759508		AAEL005220	325.422	382.285	1.17474		AAEL012596	0	5.98537
AAEL007375	98.1297	119.26	1.21533		AAEL005740	139.214	171.51	1.23199		AAEL001939	109.898	116.465	1.05976							AAEL011195	1060.6	1135.55	1.07067		AAEL003877	255.906	193.115	0.754633		AAEL017536	77.4848	381.445	4.92284		AAEL017053	0	5.96771
AAEL004498,AAEL004501	950.33	1154.44	1.21478		AAEL000691	140.531	153.066	1.0892		AAEL001605	102.247	129.674	1.26824							AAEL005220	468.091	559.563	1.19541		AAEL008801	645.971	486.992	0.753891		AAEL013138	256.382	378.325	1.47563		AAEL003471	0	5.9619
AAEL001061	820.779	994.821	1.21204		AAEL010467	178.771	193.483	1.0823		AAEL006096	98.1606	105.182	1.07153							AAEL004378	203.798	231.113	1.13403		AAEL012001	408.777	294.104	0.719473		AAEL007383	330.494	372.944	1.12844		AAEL000337	0	5.95981
AAEL005722	2117.98	2558.59	1.20803		AAEL004453,AAEL004472	155.012	165.764	1.06936		AAEL001204	119.96	125.381	1.04519							AAEL003764	130.427	132.282	1.01422		AAEL005428	732.864	512.724	0.699617		AAEL003512	276.492	372.436	1.347		AAEL013311	0	5.95947
AAEL001495	90.2927	108.982	1.20699		AAEL004297	148.059	162.346	1.0965		AAEL002550	101.055	133.092	1.31703							AAEL002813	202.227	210.635	1.04158		AAEL002083	305.004	205.225	0.67286		AAEL005849	127.914	368.461	2.88054		AAEL008678	0	5.94073
AAEL006836	151.918	183.344	1.20686		AAEL003203	317.851	385.036	1.21137		AAEL006141	59.8046	139.64	2.33494							AAEL003872	2005.14	2407.35	1.20059		AAEL005293	514.051	338.259	0.658026		AAEL012740	414.483	365.405	0.881592		AAEL000659	0	5.92138
AAEL006572	201.359	242.538	1.20451		AAEL003303	278.722	363.236	1.30322		AAEL003689	316.574	1167.09	3.68663							AAEL001113	678.439	706.408	1.04123		AAEL013875	446.881	276.587	0.618928		AAEL003418	165.684	361.771	2.1835		AAEL005735	0	5.9062
AAEL007609	318.413	383.501	1.20441		AAEL017536	293.003	827.264	2.8234		AAEL005617	118.257	124.17	1.05							AAEL004067	322.034	338.822	1.05213		AAEL011197	2787.52	1719.99	0.617032		AAEL000291	472.629	361.471	0.764809		AAEL006188	0	5.90139
AAEL009882	91.4935	110.146	1.20387		AAEL004976	152.389	185.165	1.21508		AAEL005796	98.9085	155.206	1.56919							AAEL003056	218.02	245.062	1.12403		AAEL003645	349.65	213.953	0.611906		AAEL011510	230.697	356.874	1.54694		AAEL001724	0	5.83966
AAEL012279	103.844	124.961	1.20335		AAEL004492	113.436	116.346	1.02565		AAEL009362	112.479	117.503	1.04467							AAEL007707	165.039	179.502	1.08763		AAEL004223	3268.39	1388.26	0.424753		AAEL002083	285.6	347.621	1.21716		AAEL009164	0	5.82656
AAEL016982	213.469	256.753	1.20276		AAEL008137	89.0392	122.07	1.37097		AAEL002629	108.985	144.472	1.32561							AAEL009637	165.179	178.258	1.07918		AAEL004149	1345.8	297.187	0.220826		AAEL005129	429.878	345.048	0.802665		AAEL014825	0	5.81315
AAEL010787	490.065	589.142	1.20217		AAEL011330	78.3862	105.688	1.3483		AAEL014051	94.563	102.07	1.07939							AAEL008848	307.79	331.352	1.07655		AAEL001061	94.0403	201.444	2.1421		AAEL006256	389.058	343.308	0.882408		AAEL013564	0	5.78633
AAEL013277,AAEL013284	103.022	123.824	1.20192		AAEL006177	109.44	112.863	1.03128		AAEL008645	100.41	105.924	1.05491							AAEL004783	494.333	529.914	1.07198		AAEL001209	91.8248	168.721	1.83742		AAEL001005	253.993	342.873	1.34993		AAEL002482	0	5.78302
AAEL008041	104.305	125.289	1.20118		AAEL010155	172.826	343.239	1.98604		AAEL002843	93.7753	127.242	1.35688							AAEL002504	211.508	213.639	1.01008		AAEL017514	287.03	515.629	1.79643		AAEL000733	154.42	333.576	2.16019		AAEL014254	0	5.77448
AAEL008002	113.32	135.889	1.19916		AAEL008575	93.8978	133.317	1.41981		AAEL003514	111.032	121.571	1.09492							AAEL017022	4015.33	4192.18	1.04404		AAEL007942	89.4152	138.009	1.54346		AAEL016984	417.853	325.576	0.779164		AAEL000975	0	5.77357
AAEL002832	1867.46	2238.15	1.1985		AAEL017191	61.6194	122.322	1.98512		AAEL004221	118.452	126.987	1.07205							AAEL010843	193.772	199.323	1.02865		AAEL014609	183.184	266.263	1.45353		AAEL001488	323.731	322.798	0.997118		AAEL010677	0	5.77306
AAEL002121	87.2658	104.564	1.19822		AAEL010766	119.613	120.801	1.00993		AAEL010156	167.381	228.196	1.36333							AAEL005085	593.635	734.167	1.23673		AAEL007010	82.2468	108.88	1.32382		AAEL010754	218.82	318.69	1.4564		AAEL013440	0	5.63737
AAEL003716	157.631	188.812	1.19781		AAEL014128	533.761	1018.18	1.90756		AAEL003243	95.5382	115.271	1.20654							AAEL005766	362.28	378.195	1.04393		AAEL009078	96.0331	125.731	1.30925		AAEL009257	132.648	318.638	2.40213		AAEL007692	0	5.57151
AAEL010634	100.215	119.919	1.19662		AAEL004152	91.7157	103.752	1.13123		AAEL010652	124.103	134.024	1.07994							AAEL010818	650.788	735.192	1.1297		AAEL013989	84.742	109.143	1.28794		AAEL015595	133.547	315.272	2.36076		AAEL017016	0	5.53364
AAEL011288	575.77	688.423	1.19566		AAEL005890	100.182	134.535	1.34291		AAEL000800	107.264	108.138	1.00815							AAEL007945	189.773	214.662	1.13115		AAEL005332	364.281	457.751	1.25659		AAEL017144	426.014	309.602	0.726741		AAEL004488	0	5.5333
AAEL005038	132.121	157.514	1.1922		AAEL008182	132.896	187.935	1.41415		AAEL000424	94.0053	107.265	1.14105							AAEL001668	323.878	381.434	1.17771		AAEL010032	114.455	137.352	1.20005		AAEL010171	208.78	307.17	1.47126		AAEL006819	0	5.51122
AAEL008494	128.603	152.962	1.18941		AAEL009263	189.871	243.317	1.28149		AAEL003661	144.472	177.088	1.22576							AAEL011871	278.427	300.085	1.07779		AAEL013960	99.1627	108.378	1.09293		AAEL007777	177.632	306.83	1.72734		AAEL006229	0	5.49923
AAEL004175	2002.96	2382.29	1.18938		AAEL000670	77.5008	106.968	1.38022		AAEL008868,AAEL008874	84.2163	117.917	1.40017							AAEL008781	17458	18341.5	1.05061		AAEL006699	181.739	196.662	1.08211		AAEL002629	162.699	299.572	1.84127		AAEL009973	0	5.48818
AAEL002261	112.571	133.864	1.18915		AAEL012499	210.262	296.514	1.41021		AAEL013936	109.903	128.795	1.1719							AAEL013359	1063.19	1186.14	1.11564		AAEL004027	210.614	223.397	1.06069		AAEL006158	216.354	299.288	1.38333		AAEL000509	0	5.48682
AAEL002411	104.245	123.902	1.18857		AAEL002337	100.108	101.433	1.01324		AAEL014005	89.784	121.281	1.35081							AAEL008599	134.077	184.589	1.37674		AAEL011309	106.516	111.842	1.05		AAEL003835	366.629	296.525	0.808788		AAEL006175	0	5.47862
AAEL003396	1885.09	2238.77	1.18762		AAEL013305	102.027	142.399	1.3957		AAEL002435	150.106	160.257	1.06763							AAEL005451	2300.15	2389	1.03863		AAEL007702	117.173	115.803	0.988308		AAEL009201	265.611	288.803	1.08732		AAEL010229	0	5.46212
AAEL013279	208.828	247.919	1.18719		AAEL005172	88.6191	137.552	1.55217		AAEL011101	91.2419	106.517	1.16741							AAEL017096	5537.53	5942.4	1.07311		AAEL012207	124.153	118.161	0.951737		AAEL001432	174.99	287.852	1.64496		AAEL015144	0	5.45865
AAEL000823	1963.62	2328.89	1.18602		AAEL002406	126.461	139.031	1.0994		AAEL004589	113.679	126.255	1.11063							AAEL010986	223.016	231.192	1.03666		AAEL005558	160.407	151.362	0.943612		AAEL006885	338.359	284.271	0.840146		AAEL009686	0	5.42961
AAEL003942	1860.69	2206	1.18558		AAEL011272	99.5146	109.082	1.09614		AAEL008210	80.4991	106.471	1.32264							AAEL015247	161.359	169.919	1.05305		AAEL013571	114.963	102.162	0.888651		AAEL011758	159.008	278.548	1.75179		AAEL006712	0	5.405
AAEL008946	99.0677	117.392	1.18497		AAEL014055	98.4077	148.152	1.50549		AAEL005736	95.2811	101.915	1.06962							AAEL010416	138.253	157.102	1.13634		AAEL004434	168.631	149.344	0.885626		AAEL006169	121.967	275.476	2.25861		AAEL007543	0	5.39287
AAEL017119	844.569	1000.3	1.18439		AAEL003312	105.924	199.399	1.88247		AAEL009092	106.017	118.967	1.12215							AAEL001872	323.217	329.553	1.0196		AAEL003844	222.715	189.936	0.852821		AAEL001913	180.564	274.975	1.52287		AAEL003300	0	5.39283
AAEL006271	231.349	273.888	1.18387		AAEL009772	105.454	131.098	1.24318		AAEL010422	83.3478	105.275	1.26308							AAEL007946	206.478	260.981	1.26397		AAEL007787	155.668	130.847	0.840552		AAEL003234	160.658	268.203	1.6694		AAEL003407	0	5.36034
AAEL007752	188.081	221.822	1.1794		AAEL004438	115.39	137.657	1.19297		AAEL017438	88.163	101.699	1.15353							AAEL000529	579.34	710.398	1.22622		AAEL002764	120.758	100.076	0.828732		AAEL010977	392.216	267.76	0.682685		AAEL007329	0	5.34199
AAEL014583	3176.39	3743.87	1.17866		AAEL015319	109.187	112.095	1.02663		AAEL001769	140.756	156.194	1.10968							AAEL005221	176.518	216.812	1.22827		AAEL009645	171.125	131.099	0.766101		AAEL002158	227.313	266.153	1.17087		AAEL002477	0	5.27538
AAEL009496	1488.22	1751.43	1.17686		AAEL001845	72.775	111.102	1.52665		AAEL010312	121.25	132.609	1.09368							AAEL013628	1007.15	1091.75	1.084		AAEL017211	760.799	548.961	0.721559		AAEL014944	230.055	264.79	1.15099		AAEL001200	0	5.26763
AAEL001779	100.717	118.374	1.17531		AAEL001496	108.064	111.808	1.03465		AAEL005455	128.966	137.569	1.06671							AAEL013009	155.131	196.973	1.26972		AAEL001673	156.637	109.915	0.701718		AAEL003841	206.742	264.604	1.27988		AAEL009901	0	5.26636
AAEL002501	95.244	111.919	1.17508		AAEL003950	81.3581	102.5	1.25986		AAEL004278	97.7283	133.495	1.36598							AAEL004647	480.256	498.41	1.0378		AAEL010661	243.586	153.795	0.631379		AAEL010366	142.742	263.047	1.84281		AAEL005302	0	5.24673
AAEL000200	118.385	138.986	1.17402		AAEL007017	82.7987	106.378	1.28478		AAEL008461	77.934	101.813	1.3064							AAEL002334	178.315	241.523	1.35447		AAEL006805	310.292	193.631	0.624028		AAEL003750	228.796	260.668	1.1393		AAEL017114	0	5.23289
AAEL012731	92.314	108.353	1.17374		AAEL014980	86.363	100.538	1.16413		AAEL005114	112.003	122.829	1.09666							AAEL012532	387.994	390.509	1.00648		AAEL017245	338.487	168.98	0.499222		AAEL003046	226.007	254.199	1.12474		AAEL017472	0	5.18989
AAEL007778	153.536	180.148	1.17333		AAEL013538	149.694	154.252	1.03045		AAEL004040	107.903	141.753	1.31371							AAEL002833	146.032	153.427	1.05064		AAEL000044	154.639	189.699	1.22672		AAEL007490	220.064	253.283	1.15095		AAEL002606	0	5.18796
AAEL000486	120.279	141.095	1.17306		AAEL006713	114.074	134.594	1.17988		AAEL004235	96.531	112.777	1.1683							AAEL011288	732.879	795.991	1.08612		AAEL006798	130.821	122.349	0.93524		AAEL005457	130.305	251.042	1.92657		AAEL004115	0	5.18636
AAEL009994	2185.63	2563.82	1.17303		AAEL009905	90.5212	106.564	1.17723		AAEL014959	108.952	111.984	1.02783							AAEL012175	899.072	925.779	1.02971		AAEL014614	157.531	122.4	0.77699		AAEL004112	125.688	250.071	1.98962		AAEL003354	0	5.1825
AAEL010032	244.843	287.061	1.17243		AAEL010002	109.59	112.639	1.02782		AAEL010241	93.5843	104.895	1.12086							AAEL008723	191.133	210.185	1.09968		AAEL009468	80.3141	102.534	1.27666		AAEL009101	195.483	249.945	1.2786		AAEL017184	0	5.17953
AAEL010801	237.573	278.42	1.17193		AAEL003624	136.389	168.067	1.23226		AAEL003670	95.4168	106.02	1.11113							AAEL000757	127.669	136.166	1.06655		AAEL014617	183.974	226.501	1.23116		AAEL004509	113.821	249.415	2.19129		AAEL002716	0	5.17641
AAEL000604	116.39	136.234	1.1705		AAEL000218	156.369	198.06	1.26662		AAEL011105	102.787	107.472	1.04558							AAEL005289	150.17	154.881	1.03137		AAEL000898	229.494	160.695	0.700214		AAEL005471	101.633	249.026	2.45025		AAEL004799	0	5.17243
AAEL013145	138.288	161.857	1.17043		AAEL006728	101.519	109.623	1.07983		AAEL011063	104.074	108.822	1.04562							AAEL014734	133.485	136.247	1.02069		AAEL011334	130.567	187.975	1.43968		AAEL017247	270.647	244.508	0.90342		AAEL000287	0	5.16155
AAEL003664	101.556	118.829	1.17008		AAEL004467	111.744	115.69	1.03531		AAEL009377	120.865	137.864	1.14064							AAEL015386	136.986	145.856	1.06475		AAEL000859	328.115	143.68	0.437895		AAEL000795	123.988	243.056	1.96032		AAEL009858	0	5.10715
AAEL013158	1182.26	1381.53	1.16855		AAEL007701	119.535	133.332	1.11542		AAEL001006	92.6295	114.204	1.23291							AAEL000500	112.032	118.701	1.05953							AAEL004523	134.013	242.332	1.80827		AAEL005110	0	5.08828
AAEL017501	562.563	656.81	1.16753		AAEL007184	101.176	102.371	1.01181		AAEL015595	97.098	108.588	1.11833							AAEL000424	96.3325	103.375	1.07311							AAEL001864	158.004	239.717	1.51716		AAEL008821	0	5.08664
AAEL015512	189.187	220.747	1.16682		AAEL004920	105.717	105.813	1.00091		AAEL013245	95.8435	117.096	1.22174							AAEL001703	31755.4	32727	1.0306							AAEL013875	226.517	235.754	1.04078		AAEL012587	0	5.07062
AAEL013510	164.779	192.209	1.16647		AAEL010644	131.545	186.056	1.41439		AAEL006931	108.03	122.646	1.1353							AAEL004457	586.171	606.059	1.03393							AAEL000200	37.974	235.752	6.20825		AAEL011303	0	5.06721
AAEL012684	290.417	337.947	1.16366		AAEL012996	81.6577	103.173	1.26348		AAEL013486	105.82	117.524	1.1106							AAEL003831	101.552	107.493	1.0585							AAEL000947	66.924	235.444	3.51808		AAEL006332	0	5.04101
AAEL013877	90.9244	105.719	1.16271		AAEL010912	119.934	122.312	1.01983		AAEL006847	107.036	142.101	1.3276							AAEL003750	412.18	422.749	1.02564							AAEL003160	215.267	233.512	1.08476		AAEL000961	0	5.03656
AAEL000006	115.338	134.057	1.1623		AAEL012234	100.343	103.248	1.02895		AAEL004937	81.8263	162.553	1.98656							AAEL009403	1559.45	1801.03	1.15491							AAEL005165	231.344	233.188	1.00797		AAEL005851	0	5.01907
AAEL003924	94.0838	109.094	1.15954		AAEL006889	102.114	115.52	1.13128		AAEL000931	110.994	124.911	1.12539							AAEL009330	1211.99	1220.32	1.00687							AAEL002881	239.252	230.63	0.963963		AAEL006215	0	5.01022
AAEL008500	503.303	582.504	1.15736		AAEL003686	99.3813	119.029	1.1977		AAEL005947	120.639	157.782	1.30789							AAEL005097	1546.69	1733.4	1.12072							AAEL005558	159.271	229.813	1.44291		AAEL001961	0	5.00211
AAEL008620	109.395	126.582	1.15711		AAEL014296	102.99	120.357	1.16863		AAEL008106	125.645	326.002	2.59463							AAEL011758	350.319	358.482	1.0233							AAEL012671	276.375	228.627	0.827235		AAEL000317	0	4.99489
AAEL002861	119.125	137.805	1.15681		AAEL008854	107.02	109.132	1.01973		AAEL005400	118.37	119.791	1.012							AAEL006483	2782.09	2891.44	1.0393							AAEL007945	208.112	225.355	1.08285		AAEL002980	0	4.96182
AAEL000211	87.4522	100.639	1.15079		AAEL014642	81.6222	107.9	1.32194		AAEL010248	108.868	142.898	1.31258							AAEL010012	145.975	152.424	1.04418							AAEL002833	160.174	225.221	1.4061		AAEL012542	0	4.93831
AAEL006577	93.215	107.047	1.14839		AAEL009400	143.723	146.235	1.01748		AAEL017385	116.373	127.371	1.09451							AAEL004851	2872.01	3537.63	1.23176							AAEL003624	92.6893	223.498	2.41126		AAEL007126	0	4.93597
AAEL004347	96.1902	110.4	1.14773		AAEL013390	129.67	151.413	1.16768		AAEL000793	118.379	140.221	1.18451							AAEL012326	346.69	350.076	1.00977							AAEL013279	113.214	222.241	1.96302		AAEL017151	0	4.93428
AAEL004059	174.518	200.262	1.14751		AAEL009142	103.22	113.022	1.09496		AAEL004010	108.562	132.817	1.22342							AAEL012069	142.362	161.007	1.13097							AAEL013407	178.009	221.993	1.24709		AAEL003803	0	4.93417
AAEL009345	94.2081	108.03	1.14672		AAEL001606	100.328	109.379	1.09021		AAEL009018	128.932	222.063	1.72233							AAEL010479	390.706	393.514	1.00719							AAEL003285	167.311	221.578	1.32435		AAEL010180	0	4.93226
AAEL013027	1214.69	1392.59	1.14646		AAEL015575	95.613	114.937	1.20211		AAEL007530	92.852	114.424	1.23233							AAEL002886	243.532	265.639	1.09078							AAEL007065	250.684	219.458	0.875437		AAEL014729	0	4.91862
AAEL013827	93.9456	107.654	1.14592		AAEL017081	96.6122	114.5	1.18515		AAEL008257	101.324	104.222	1.0286							AAEL013703	3938.64	4031.61	1.0236							AAEL004498,AAEL004501	479.79	218.522	0.455453		AAEL006997	0	4.91083
AAEL000010	1399.1	1603.04	1.14577		AAEL004148	122.675	131.92	1.07536		AAEL010228	84.9912	103.655	1.2196							AAEL009257	244.429	268.188	1.0972							AAEL005515	261.865	218.087	0.832822		AAEL006147	0	4.88226
AAEL013625	1937.03	2218.46	1.14529		AAEL011309	110.606	111.185	1.00523		AAEL010235	206.715	214.195	1.03619							AAEL010777	170.36	170.436	1.00045							AAEL007097	6.74816	214.529	31.7907		AAEL008909	0	4.87389
AAEL002023	219.503	251.333	1.14501		AAEL012095	91.1255	111.682	1.22558		AAEL001362	97.0466	117.498	1.21074							AAEL003849	1100.61	1182.68	1.07457							AAEL002174	99.5046	213.804	2.14868		AAEL001971	0	4.86449
AAEL004823	105.319	120.581	1.14491		AAEL005904	100.893	135.934	1.34731		AAEL014025	70.3345	106.439	1.51333							AAEL002295	269.754	309.443	1.14713							AAEL003619	101.939	213.652	2.09588		AAEL001357	0	4.85935
AAEL010012	115.457	132.093	1.14409		AAEL004421	100.051	125.876	1.25812		AAEL002046	79.9784	113.554	1.41981							AAEL008093	1298.56	1489.5	1.14704							AAEL011345	91.5528	211.567	2.31087		AAEL011171	0	4.83788
AAEL004060	297.005	339.344	1.14255		AAEL001939	102.071	119.868	1.17436		AAEL010153	161.319	206.823	1.28207							AAEL005821	237.825	263.865	1.10949							AAEL005610	167.904	211.397	1.25903		AAEL005309	0	4.80011
AAEL001004	90.2799	103.091	1.1419		AAEL001605	102.021	117.089	1.1477		AAEL004918	81.8055	105.627	1.2912							AAEL004498,AAEL004501	1080.55	1109.36	1.02666							AAEL010843	166.717	209.222	1.25495		AAEL002276	0	4.78599
AAEL009825	2413.86	2755.9	1.1417		AAEL006096	105.912	111.706	1.05471		AAEL005212	236.334	253.661	1.07332							AAEL007298	158.057	162.684	1.02927							AAEL003655	158.889	208.917	1.31486		AAEL009918	0	4.78466
AAEL008248	89.7313	102.344	1.14056		AAEL001204	115.269	115.848	1.00502		AAEL008519	75.89	107.43	1.4156							AAEL000795	250.5	271.585	1.08417							AAEL002827	220.954	208.664	0.944378		AAEL017265	0	4.78355
AAEL005877	88.996	101.453	1.13997		AAEL002550	97.9776	134.005	1.36771		AAEL003669	135.872	403.999	2.97338							AAEL014039	333.319	340.197	1.02063							AAEL006138	8.43895	207.515	24.5901		AAEL004483	0	4.78242
AAEL008103	2447.02	2788.37	1.1395		AAEL006141	64.448	205.656	3.19104		AAEL003687	107.651	309.123	2.87153							AAEL008039	205.012	215.855	1.05289							AAEL010219	137.657	206.536	1.50037		AAEL012372	0	4.78183
AAEL010230	114.886	130.787	1.13841		AAEL003689	357.741	411.028	1.14895		AAEL003706	92.7034	285.576	3.08053							AAEL006053	410.099	444.594	1.08411							AAEL009859	295.93	205.371	0.693985		AAEL011377	0	4.77491
AAEL013320	131.964	150.13	1.13766		AAEL001372	98.1487	103.931	1.05891		AAEL017029	90.4165	105.459	1.16637							AAEL006256	1064.75	1066.48	1.00162							AAEL010819	140.066	204.365	1.45906		AAEL006545	0	4.7747
AAEL008364	95.1426	108.082	1.136		AAEL005617	108.351	120.175	1.10913		AAEL003004	82.8319	107.059	1.29249							AAEL012740	1128.87	1212.73	1.07429							AAEL003877	150.076	204.005	1.35934		AAEL015678	0	4.74894
AAEL004071	117.488	133.441	1.13578		AAEL005796	102.952	171.447	1.66531		AAEL000149	86.8933	114.287	1.31526							AAEL003066	378.801	394.197	1.04064							AAEL008364	84.7465	203.15	2.39715		AAEL015679	0	4.74894
AAEL012591	125.897	142.714	1.13358		AAEL001864	103.112	150.779	1.46228		AAEL003469	83.3465	102.52	1.23005							AAEL012382	198.686	223.301	1.12389							AAEL003393	253.3	202.734	0.800371		AAEL015680	0	4.74894
AAEL004386	355.88	402.086	1.12984		AAEL015099	152.105	165.461	1.08781		AAEL013132	86.4138	102.363	1.18457							AAEL009074	517.857	571.493	1.10357							AAEL009074	311.872	198.799	0.637438		AAEL015681	0	4.74894
AAEL008481	2331.34	2623.89	1.12549		AAEL009362	112.805	118.783	1.05299		AAEL012029	87.6956	102.557	1.16947							AAEL012271	272.967	284.429	1.04199							AAEL002504	126.289	196.822	1.5585		AAEL008753	0	4.74763
AAEL002334	178.786	201.097	1.12479		AAEL010145	129.045	133.073	1.03121		AAEL000074	94.0486	116.372	1.23736							AAEL014932	294.949	314.416	1.066							AAEL001668	198.227	196.269	0.990122		AAEL013347	0	4.74177
AAEL009257	354.748	398.338	1.12288		AAEL002629	107.453	144.162	1.34163		AAEL003990	77.8337	104.546	1.3432							AAEL013021	570.543	680.921	1.19346							AAEL006696	101.79	192.101	1.88723		AAEL000636	0	4.74105
AAEL000804	262.978	294.919	1.12146		AAEL014051	92.7854	105.749	1.13972		AAEL017513	68.7065	131.452	1.91324							AAEL008880	503.608	517.756	1.02809							AAEL005766	291.898	191.359	0.655568		AAEL006051	0	4.7151
AAEL002554	115.769	129.736	1.12065		AAEL008645	101.686	107.936	1.06146		AAEL001472	76.133	101.142	1.32849							AAEL017558	199.049	245.834	1.23504							AAEL006721	161.224	191.274	1.18639		AAEL011600	0	4.69858
AAEL005760	132.169	147.877	1.11885		AAEL004565	63.3353	109.666	1.73151		AAEL003862	54.2088	116.879	2.15609							AAEL011551	252.127	266.033	1.05515							AAEL008007	75.3257	190.737	2.53216		AAEL012581	0	4.67301
AAEL001102	103.1	115.237	1.11772		AAEL002843	94.4353	128.816	1.36407		AAEL015678	49.1149	148.172	3.01684							AAEL009129	270.334	334.989	1.23917							AAEL004699	223.07	190.62	0.85453		AAEL000119	0	4.66926
AAEL017029	165.405	184.728	1.11682		AAEL003514	108.192	127.41	1.17763		AAEL015679	49.1149	148.172	3.01684							AAEL007880	117.353	121.08	1.03176							AAEL010065	131.784	190.333	1.44428		AAEL011532	0	4.65381
AAEL017451	263.715	293.972	1.11473		AAEL004221	119.809	127.757	1.06634		AAEL015680	49.1149	148.172	3.01684							AAEL011641	272.403	278.872	1.02375							AAEL008657	62.9863	188.596	2.99424		AAEL015669	0	4.63778
AAEL001414	254.217	282.196	1.11006		AAEL010156	167.046	305.013	1.82592		AAEL015681	49.1149	148.172	3.01684							AAEL015110	107.024	132.962	1.24236							AAEL001779	184.505	188.024	1.01907		AAEL012143	0	4.63109
AAEL012764	178.881	198.513	1.10975		AAEL003243	88.2664	110.371	1.25043		AAEL004851	3514.02	3722.72	1.05939							AAEL008328	117.453	132.737	1.13013							AAEL003123	84.7461	187.644	2.21419		AAEL009277	0	4.62227
AAEL004468	95.9713	106.481	1.10951		AAEL010900	93.2043	104.592	1.12218		AAEL004454	139.381	187.525	1.34541							AAEL009323	132.692	152.91	1.15237							AAEL012860	64.6423	187.502	2.90061		AAEL002142	0	4.61962
AAEL003494	98.9612	109.779	1.10931		AAEL010652	129.718	148.067	1.14145		AAEL009403	1297.58	1624.36	1.25184							AAEL002956	154.833	166.535	1.07558							AAEL017494	151.498	187.383	1.23687		AAEL008501	0	4.61615
AAEL011470	159.664	177.086	1.10912		AAEL000800	104.413	114.713	1.09865		AAEL015064	569.649	599.273	1.052							AAEL001774	111.425	194.666	1.74706							AAEL000269	334.715	186.417	0.556942		AAEL004958	0	4.59632
AAEL004423	297.06	329.361	1.10874		AAEL000424	98.2844	100.03	1.01776		AAEL005451	1883.1	2097.28	1.11374							AAEL004088	95.14	120.736	1.26904							AAEL017258	129.19	185.392	1.43503		AAEL011854	0	4.58793
AAEL017468	189.597	210.092	1.1081		AAEL003661	145.189	166.382	1.14597		AAEL000529	553.764	630.097	1.13784							AAEL000274	102.764	105.724	1.0288							AAEL012062	396.371	183.707	0.463472		AAEL003687	0	4.582
AAEL001916	140.119	155.201	1.10764		AAEL008868,AAEL008874	83.3299	118.336	1.42009		AAEL003685	454.314	928.825	2.04446							AAEL003676	108.077	127.183	1.17678							AAEL017469	100.447	183.163	1.82348		AAEL007943	0	4.57424
AAEL011471	2595.89	2867.7	1.10471		AAEL013936	112.453	114.834	1.02117		AAEL001511	776.118	795.404	1.02485							AAEL017407	100.064	138.933	1.38844							AAEL010765	241.653	182.829	0.756577		AAEL003235	0	4.56133
AAEL003404	315.569	348.418	1.10409		AAEL014005	91.3988	104.108	1.13905		AAEL009859	550.92	563.853	1.02348							AAEL005056	129.484	142.85	1.10323							AAEL008880	192.559	182.033	0.945336		AAEL004492	0	4.53717
AAEL012865	200.613	221.18	1.10252		AAEL009899	103.43	115.596	1.11763		AAEL010692	202.591	234.097	1.15552							AAEL015549	136.472	161.179	1.18104							AAEL008757	193.922	180.684	0.931735		AAEL000013	0	4.532
AAEL007160	96.2962	106.022	1.101		AAEL007881	105.167	118.682	1.12851		AAEL001623	190.42	195.326	1.02576							AAEL011498	129.956	143.171	1.10169							AAEL013535	35.2277	178.433	5.06513		AAEL000714	0	4.5271
AAEL007698	91.9802	101.105	1.0992		AAEL008930	98.7485	100.953	1.02232		AAEL003659	473.758	1037.13	2.18916							AAEL001997	83.9491	109.18	1.30055							AAEL004042	76.0235	176.854	2.32631		AAEL011118	0	4.51691
AAEL000709	91.3723	100.222	1.09685		AAEL002435	145.878	158.328	1.08535		AAEL005471	114.377	127.968	1.11883							AAEL005170	102.451	105.406	1.02884							AAEL015086	127.634	176.771	1.38498		AAEL000188	0	4.50025
AAEL008353	2341.93	2566.45	1.09587		AAEL011101	93.6193	102.661	1.09658		AAEL007875	148.769	156.019	1.04873							AAEL011711	132.708	136.673	1.02988							AAEL000410	136.019	174.756	1.28479		AAEL002373	0	4.48391
AAEL000335	149.428	163.686	1.09542		AAEL004589	118.936	139.933	1.17654		AAEL013021	616.363	653.847	1.06081							AAEL009313	255.478	271.572	1.063							AAEL001151	97.0922	174.576	1.79804		AAEL003962	0	4.48146
AAEL000795	418.166	457.662	1.09445		AAEL008210	78.6005	106.972	1.36096		AAEL009275	191.6	201.047	1.04931							AAEL008784	457.804	479.086	1.04649							AAEL010801	65.0855	174.226	2.67688		AAEL004476	0	4.48036
AAEL000986	117.665	128.724	1.09399		AAEL001484	185.282	186.385	1.00595		AAEL015006	715.018	730.045	1.02102							AAEL007868	123.917	127.902	1.03216							AAEL004968	74.0103	173.204	2.34027		AAEL011847	0	4.46948
AAEL002610	148.904	162.725	1.09282		AAEL001306	88.8595	137.626	1.5488		AAEL006511	1716.53	1729.37	1.00748							AAEL008567	988.978	1108.28	1.12063							AAEL003613	111.573	172.808	1.54883		AAEL006524	0	4.46731
AAEL009341	1896.64	2069.21	1.09099		AAEL005736	92.468	102.53	1.10882		AAEL008880	261.454	300.105	1.14783							AAEL013007	141.118	148.292	1.05084							AAEL001113	249.709	172.589	0.691161		AAEL007368	0	4.4524
AAEL017481	768.22	837.937	1.09075		AAEL000038	76.981	106.966	1.38951		AAEL001759	1994.43	2005.66	1.00563							AAEL006928	108.315	113.931	1.05185							AAEL003986	118.298	172.496	1.45815		AAEL001498	0	4.44969
AAEL003210	107.173	116.861	1.0904		AAEL009092	108.79	121.728	1.11893		AAEL014932	417.72	470.281	1.12583							AAEL010823	177.257	198.965	1.12247							AAEL000208	68.9763	170.447	2.4711		AAEL003974	0	4.42474
AAEL005997	252.905	275.365	1.08881		AAEL010422	78.7454	100.009	1.27003		AAEL010017	253.323	333.059	1.31476							AAEL005269	166.697	180.191	1.08095							AAEL003550	262.611	169.85	0.646774		AAEL008115	0	4.41639
AAEL012585	1749.15	1903.35	1.08816		AAEL017438	82.8455	132.917	1.6044		AAEL017290	261.761	339.478	1.2969							AAEL011255	132.201	145.435	1.10011							AAEL009226	75.8716	169.377	2.23242		AAEL013266	0	4.41254
AAEL006820	627.089	682.244	1.08795		AAEL001769	137.229	148.662	1.08331		AAEL004116	211.753	315.757	1.49116							AAEL005638	91.115	112.729	1.23722							AAEL010900	114.058	168.787	1.47983		AAEL010878	0	4.40642
AAEL010673	145.438	158.074	1.08688		AAEL010312	118.081	128.967	1.09219		AAEL005817	2050.64	2148.45	1.0477							AAEL000458	101.569	108.007	1.06339							AAEL003675	152.773	166.043	1.08686		AAEL000884	0	4.3902
AAEL012964	229.007	248.171	1.08368		AAEL005455	138.925	143.188	1.03069		AAEL007718	262.607	271.768	1.03488							AAEL012661	112.563	128.292	1.13974							AAEL003857	136.926	165.714	1.21024		AAEL007808	0	4.37237
AAEL002174	96.7669	104.846	1.08349		AAEL008260	93.0194	101.565	1.09187		AAEL011090	114.028	129.085	1.13205							AAEL005143	169.887	174.173	1.02523							AAEL001421	109.032	165.292	1.516		AAEL011234	0	4.37046
AAEL011742	138.38	149.742	1.08211		AAEL012746	131.311	135.298	1.03036		AAEL006115	177.618	196.152	1.10435							AAEL005435	193.244	216.032	1.11792							AAEL006829	50.8824	165.084	3.24442		AAEL002946	0	4.3655
AAEL004523	250.054	270.475	1.08167		AAEL006249	131.477	133.869	1.01819		AAEL009637	185.23	218.604	1.18018							AAEL017512	124.148	127.114	1.02389							AAEL003210	95.2348	164.724	1.72966		AAEL009727	0	4.36527
AAEL006744	120.131	129.77	1.08024		AAEL009901	77.396	111.46	1.44013		AAEL010059	196.392	203.1	1.03416							AAEL013144	155.835	174.565	1.12019							AAEL017380	782.18	163.345	0.208833		AAEL005717	0	4.36291
AAEL013353	234.538	253.356	1.08023		AAEL004278	102.052	113.283	1.11005		AAEL009572	162.508	168.287	1.03556							AAEL011381	160.307	170.104	1.06111							AAEL017481	139.455	162.83	1.16762		AAEL005829	0	4.3537
AAEL012207	727.171	784.332	1.07861		AAEL006417	114.706	134.518	1.17272		AAEL012681	446.339	500.324	1.12095							AAEL001715	115.027	125.197	1.08841							AAEL009185	211.514	162.394	0.76777		AAEL017186	0	4.35353
AAEL002557	108.666	117.202	1.07855		AAEL008461	79.9722	100.66	1.25869		AAEL008595	169.996	180.482	1.06168							AAEL013739	100.165	110.988	1.10805							AAEL004423	193.139	162.332	0.840493		AAEL009089	0	4.34783
AAEL004805	125.726	135.176	1.07516		AAEL005114	107.19	118.817	1.10847		AAEL013144	193.003	210.432	1.0903							AAEL015512	116.091	125.281	1.07916							AAEL013133	107.93	162.114	1.50203		AAEL014522	0	4.32916
AAEL013139	140.473	150.954	1.07461		AAEL013275	93.5359	101.589	1.0861		AAEL000442	1171.39	1325.92	1.13192							AAEL009651	209.237	210.229	1.00474							AAEL008848	180.658	162.087	0.897204		AAEL014716	0	4.30424
AAEL001965	126.175	135.574	1.07449		AAEL004040	106.278	142.212	1.33811		AAEL012661	175.976	204.888	1.1643							AAEL002160	154.641	170.752	1.10418							AAEL003720	157.018	161.962	1.03149		AAEL004740	0	4.29559
AAEL010097	852.793	916.261	1.07442		AAEL004235	101.631	109.607	1.07848		AAEL002081	283.316	295.56	1.04322							AAEL006115	120.18	132.31	1.10093							AAEL003116	38.967	161.713	4.15		AAEL005688	0	4.29549
AAEL005129	528.103	567.309	1.07424		AAEL014959	106.799	125.389	1.17407		AAEL005312	357.084	373.491	1.04595							AAEL009160	98.4651	106.853	1.08519							AAEL004783	150.377	161.63	1.07483		AAEL005328	0	4.27185
AAEL012026	188.328	201.868	1.0719		AAEL010241	97.0207	103.334	1.06507		AAEL011255	162.401	188.083	1.15814							AAEL006509	176.167	186.696	1.05977							AAEL017066	146.029	157.935	1.08153		AAEL014112	0	4.24146
AAEL004987	98.1289	105.095	1.07099		AAEL003670	95.7777	109.188	1.14001		AAEL006860	1613.87	1789.71	1.10896							AAEL004042	165.315	187.789	1.13595							AAEL012326	166.819	156.436	0.937759		AAEL003915	0	4.21256
AAEL001401	232.067	248.285	1.06988		AAEL011105	106.801	112.066	1.0493		AAEL012686	1839.72	1877.12	1.02033							AAEL010608	105.412	107.581	1.02058							AAEL011871	162.339	155.361	0.957016		AAEL001293	0	4.20807
AAEL005508	113.575	121.506	1.06983		AAEL011063	103.916	112.84	1.08588		AAEL001216	345.678	361.041	1.04444							AAEL001247	95.3891	104.778	1.09843							AAEL007441	67.1723	154.558	2.30092		AAEL006624	0	4.20638
AAEL013359	805.75	861.113	1.06871		AAEL012904	94.8611	102.634	1.08194		AAEL015143	215.274	221.332	1.02814							AAEL000516	120.442	133.519	1.10858							AAEL004378	198.791	154.067	0.77502		AAEL011603	0	4.19811
AAEL000987	2719.4	2905.8	1.06854		AAEL009377	115.204	137.943	1.19738		AAEL008431	210.515	217.342	1.03243							AAEL000541	120.976	136.061	1.12469							AAEL000804	94.5491	154.005	1.62884		AAEL013990	0	4.19765
AAEL001210	101.897	108.88	1.06853		AAEL015524	91.7361	109.536	1.19403		AAEL014943	287.377	337.502	1.17442							AAEL010230	97.9669	101.565	1.03673							AAEL002411	137.299	153.481	1.11786		AAEL007287	0	4.17515
AAEL014944	381.525	407.351	1.06769		AAEL001006	100.414	103.655	1.03228		AAEL012094	195.61	201.945	1.03239							AAEL007681	102.773	103.977	1.01172							AAEL007092	92.0711	152.622	1.65765		AAEL010490	0	4.15067
AAEL009212	154.943	165.289	1.06677		AAEL015595	98.1904	101.149	1.03013		AAEL001052	119.65	131.269	1.09711							AAEL010801	227.815	232.584	1.02093							AAEL002610	195.084	152.558	0.782012		AAEL009396	0	4.14954
AAEL008657	102.867	109.615	1.0656		AAEL017240	109.028	125.856	1.15435		AAEL007945	248.105	251.47	1.01356							AAEL000454	137.926	155.606	1.12818							AAEL008656	65.6512	151.956	2.3146		AAEL010638	0	4.14307
AAEL008192	1824.51	1943.13	1.06501		AAEL005651	120.649	125.971	1.04411		AAEL002372	2067.28	2179.65	1.05436							AAEL011514	104.283	123.401	1.18333							AAEL012135	90.8847	151.872	1.67104		AAEL013702	0	4.1365
AAEL013660	109.376	116.44	1.06458		AAEL013245	97.4601	149.836	1.53741		AAEL002993	148.914	151.419	1.01682							AAEL004060	109.39	126.091	1.15267							AAEL004457	160.699	151.821	0.944754		AAEL004729	0	4.13508
AAEL002158	260.641	277.455	1.06451		AAEL006931	108.478	127.541	1.17573		AAEL011498	213.906	271.538	1.26943							AAEL009487	207.554	225.477	1.08635							AAEL009637	132.303	150.825	1.14		AAEL011886	0	4.13459
AAEL001588	131.045	139.152	1.06186		AAEL014318	101.6	132.421	1.30336		AAEL001495	163.979	175.085	1.06773							AAEL012964	184.2	191.303	1.03856							AAEL003363	35.4811	150.739	4.24843		AAEL014180	0	4.13223
AAEL003750	580.589	616.031	1.06104		AAEL012113	105.154	142.889	1.35885		AAEL006836	237.38	268.206	1.12986							AAEL001206	126.823	131.645	1.03802							AAEL017153	78.962	150.066	1.90048		AAEL002562	0	4.12872
AAEL010777	354.184	375.326	1.05969		AAEL013486	118.411	177.493	1.49896		AAEL002261	148.834	178.885	1.20191							AAEL000804	161.147	184.416	1.1444							AAEL013144	120.74	149.576	1.23883		AAEL007564	0	4.1245
AAEL009506	1910.82	2023.88	1.05917		AAEL006847	106.906	150.306	1.40596		AAEL013279	195.629	233.325	1.19269							AAEL011789	98.3082	115.061	1.17041							AAEL010521	64.7003	149.022	2.30327		AAEL011740	0	4.11581
AAEL004434	311.28	329.372	1.05812		AAEL000469	108.629	119.567	1.10069		AAEL003942	1813.94	1849.22	1.01945							AAEL000486	122.438	140.373	1.14648							AAEL014932	145.187	148.633	1.02373		AAEL007426	0	4.09353
AAEL004401	272.743	288.474	1.05768		AAEL004937	90.8774	242.503	2.66846		AAEL002501	119.849	123.655	1.03176							AAEL001623	138.058	140.839	1.02014							AAEL000567	112.677	148.325	1.31637		AAEL012691	0	4.07035
AAEL006000	103.298	109.14	1.05655		AAEL000931	117.507	208.317	1.77281		AAEL007778	156.023	167.634	1.07442							AAEL011414	116.529	130.725	1.12182							AAEL013009	109.153	146.971	1.34647		AAEL000322	0	4.066
AAEL008083	700.441	739.566	1.05586		AAEL005947	126.899	145.025	1.14284		AAEL010032	119.893	129.378	1.07911							AAEL009964	178.055	182.599	1.02552							AAEL014922	54.541	146.79	2.69137		AAEL005687	0	4.06231
AAEL009875	163.68	172.797	1.0557		AAEL002144	114.432	141.791	1.23909		AAEL003664	139.038	157.772	1.13474							AAEL000766	100.281	131.107	1.3074							AAEL006953	218.84	145.607	0.665358		AAEL003405	0	4.05416
AAEL007715	2072.28	2187.48	1.05559		AAEL008106	124.122	187.935	1.51412		AAEL012684	186.69	200.468	1.0738							AAEL005543	134.925	145.417	1.07776							AAEL005069	134.555	145.346	1.0802		AAEL012441	0	4.05292
AAEL006239	164.43	173.385	1.05446		AAEL005400	115.564	120.862	1.04584		AAEL008500	1072.73	1116.63	1.04092							AAEL017247	219.669	255.268	1.16206							AAEL002956	89.0506	144.628	1.62411		AAEL003820	0	4.04988
AAEL011302	148.959	156.983	1.05387		AAEL013613	135.667	212.247	1.56447		AAEL010012	131.899	145.101	1.10009							AAEL007392	139.748	140.238	1.00351							AAEL012035	124.624	144.59	1.16021		AAEL003862	0	4.04719
AAEL013535	180.301	189.975	1.05365		AAEL000392	147.537	150.052	1.01705		AAEL005877	129.05	152.379	1.18077							AAEL007029	130.667	140.651	1.07641							AAEL010012	93.6223	143.884	1.53686		AAEL013041	0	4.02819
AAEL001206	129.976	136.684	1.05161		AAEL010248	89.9335	135.267	1.50408		AAEL008364	160.754	185.279	1.15256							AAEL000986	148.272	151.479	1.02163							AAEL002527	94.6696	141.908	1.49898		AAEL000937	0	4.02127
AAEL001872	360	377.882	1.04967		AAEL005361	82.863	101.639	1.22659		AAEL000804	434.908	466.918	1.0736							AAEL004338	105.473	112.546	1.06706							AAEL002334	118.568	141.837	1.19625		AAEL006546	0	4.01768
AAEL006389	246.917	259.062	1.04919		AAEL017385	109.581	114.618	1.04597		AAEL011470	206.385	207.996	1.00781							AAEL003161	125.023	132.323	1.05839							AAEL010059	121.052	141.562	1.16943		AAEL012546	0	4.01373
AAEL017395	96.0234	100.72	1.04891		AAEL000977	67.5677	111.233	1.64625		AAEL012865	331.566	354.025	1.06774							AAEL001479	96.7867	100.146	1.03471							AAEL002804	106.186	141.029	1.32813		AAEL003200	0	3.99848
AAEL002527	170.881	179.127	1.04826		AAEL017153	109.719	113.723	1.03649		AAEL007160	139.506	146.587	1.05076							AAEL001896	104.428	122.167	1.16987							AAEL011414	134.808	140.575	1.04278		AAEL001823	0	3.98848
AAEL002047	1538.85	1610.14	1.04633		AAEL000793	127.742	174.741	1.36792		AAEL007698	187.562	188.449	1.00473							AAEL002527	115.992	120.659	1.04024							AAEL017345	103.317	140.11	1.35612		AAEL008900	0	3.96292
AAEL008887	196.233	204.722	1.04326		AAEL004010	118.091	132.091	1.11855		AAEL000795	662.962	718.579	1.08389							AAEL000639	99.4266	103.839	1.04438							AAEL007444	135.287	139.323	1.02983		AAEL010080	0	3.94123
AAEL009160	175.312	182.666	1.04195		AAEL017497	73.6876	147.42	2.00061		AAEL002610	169.904	401.189	2.36127							AAEL017482	112.664	123.651	1.09752							AAEL004059	59.8199	139.319	2.32897		AAEL013349	0	3.93569
AAEL004378	205.756	214.36	1.04182		AAEL009018	129.863	308.919	2.37881		AAEL017481	1263.7	1419.17	1.12303							AAEL009131	104.375	149.335	1.43075							AAEL001872	185.166	138.8	0.749598		AAEL006660	0	3.93164
AAEL013875	125.696	130.935	1.04168		AAEL002720	66.6734	114.64	1.71943		AAEL005997	289.463	322.228	1.11319							AAEL003646	136.836	161.866	1.18292							AAEL010912	75.1141	138.761	1.84734		AAEL010720	0	3.93117
AAEL008490	103.503	107.536	1.03897		AAEL006446	88.8063	102.935	1.1591		AAEL011742	236.58	248.743	1.05141							AAEL006342	119.1	126.306	1.0605							AAEL008444	357.916	138.602	0.387247		AAEL011290	0	3.92343
AAEL006169	212.309	220.563	1.03888		AAEL007530	92.8794	127.609	1.37392		AAEL013139	181.494	195.741	1.0785							AAEL010014	82.7289	108.966	1.31715							AAEL010576	60.1525	138.394	2.30072		AAEL002442	0	3.91491
AAEL012181	112.184	116.355	1.03718		AAEL008257	104.014	120.895	1.1623		AAEL003750	876.1	877.376	1.00146							AAEL000328	102.273	112.873	1.10364							AAEL007162	128.193	138.09	1.0772		AAEL005178	0	3.90992
AAEL010756	1754.51	1819.66	1.03713		AAEL009691	95.0694	102.601	1.07922		AAEL017395	119.219	127.023	1.06546							AAEL012099	102.282	117.067	1.14455							AAEL007868	182.079	137.949	0.757633		AAEL014811	0	3.90843
AAEL003423	102.05	105.733	1.03609		AAEL017342	118.103	124.986	1.05828		AAEL009160	249.786	276.23	1.10587							AAEL007019	136.413	155.802	1.14213							AAEL001606	77.1537	137.789	1.7859		AAEL013914	0	3.90811
AAEL003877	142.165	147.189	1.03534		AAEL003235	63.348	109.366	1.72643		AAEL004378	271.827	292.613	1.07647																	AAEL008787	181.107	137.419	0.758772		AAEL010442	0	3.90149
AAEL012950	102.288	105.775	1.03409		AAEL010228	91.0536	119.933	1.31717		AAEL013875	204.748	235.407	1.14974																	AAEL017419	193.78	136.467	0.704237		AAEL009228	0	3.89822
AAEL007444	172.111	177.798	1.03304		AAEL010235	187.456	263.154	1.40382		AAEL006169	194.66	204.706	1.05161																	AAEL005143	79.6029	136.459	1.71425		AAEL000676	0	3.88425
AAEL003179	201.858	208.332	1.03207		AAEL005790	222.331	251.481	1.13111		AAEL012181	188.051	193.45	1.02871																	AAEL013071	83.7953	136.156	1.62486		AAEL008372	0	3.87434
AAEL001432	284.304	292.422	1.02855		AAEL001194	154.057	198.691	1.28972		AAEL003179	318.795	360.448	1.13066																	AAEL003957	234.753	136.097	0.579746		AAEL009421	0	3.86479
AAEL009320	116.623	119.897	1.02807		AAEL005567	100.262	120.639	1.20324		AAEL001432	183.929	205.476	1.11715																	AAEL012271	127.252	136.047	1.06911		AAEL001239	0	3.85668
AAEL009422	135.478	139.172	1.02727		AAEL012856	84.307	115.379	1.36856		AAEL011414	1117.4	1201.52	1.07528																	AAEL009651	128.449	136.015	1.0589		AAEL008829	0	3.84314
AAEL013492	114.873	117.992	1.02715		AAEL002377	54.3145	101.156	1.86241		AAEL000185	182.368	188.743	1.03496																	AAEL011989	86.3993	135.323	1.56625		AAEL002285,AAEL002316	0	3.82896
AAEL010574	119.539	122.771	1.02704		AAEL001362	103.063	125.402	1.21675		AAEL014365	166.182	173.169	1.04204																	AAEL012207	168.417	135.068	0.801986		AAEL005757	0	3.80002
AAEL011414	574.582	589.932	1.02672		AAEL004354	83.8409	108.248	1.29111		AAEL004088	185.203	199.321	1.07623																	AAEL013005	125.643	134.699	1.07208		AAEL002711	0	3.79208
AAEL017334	1089.64	1118.56	1.02654		AAEL009861	126.973	142.215	1.12004		AAEL004234	191.127	218.155	1.14141																	AAEL007915	120.386	132.966	1.1045		AAEL012709	0	3.74833
AAEL011424	104.478	107.2	1.02605		AAEL014025	73.02	110.333	1.511		AAEL006743	128.57	141.23	1.09847																	AAEL006509	121.409	132.29	1.08962		AAEL003870	0	3.7431
AAEL008768	125.638	128.765	1.02489		AAEL006307	73.9276	109.111	1.47592		AAEL006642	1179.65	1282.69	1.08735																	AAEL003844	172.71	131.938	0.763928		AAEL005193	0	3.73097
AAEL002886	170.559	174.506	1.02314		AAEL002046	82.4022	157.829	1.91535		AAEL002399	121.641	122.838	1.00984																	AAEL006143	72.5965	131.55	1.81207		AAEL007474	0	3.72785
AAEL014843	260.062	265.982	1.02276		AAEL010153	169.673	199.374	1.17505		AAEL009351	117.418	119.268	1.01576																	AAEL014643	46.246	131.287	2.83888		AAEL009260	0	3.72657
AAEL000410	110.268	112.761	1.02261		AAEL014768	96.3484	105.019	1.08999		AAEL001158	125.353	134.227	1.07079																	AAEL002587	40.7767	131.164	3.21664		AAEL006616	0	3.72558
AAEL008871	101.02	103.303	1.0226		AAEL007046	86.4601	101.66	1.1758		AAEL007385	772.764	838.517	1.08509																	AAEL011789	106.739	130.795	1.22537		AAEL005913	0	3.71953
AAEL002639	1309.96	1338.57	1.02184		AAEL004918	82.6397	110.715	1.33973		AAEL012183	218.694	230.186	1.05255																	AAEL010823	153.577	130.734	0.85126		AAEL014076	0	3.67703
AAEL012357	134.789	137.687	1.0215		AAEL005212	258.576	401.338	1.55211		AAEL011870	611.094	621.24	1.0166																	AAEL008802	44.6373	130.695	2.92793		AAEL009060	0	3.6723
AAEL013694	922.902	941.445	1.02009		AAEL001274	64.0173	128.317	2.00441		AAEL007383	613.781	622.251	1.0138																	AAEL002737	96.4299	130.608	1.35443		AAEL012022	0	3.66769
AAEL004855	1943.79	1980.72	1.019		AAEL008519	73.5945	113.6	1.54359		AAEL017367	132.217	142.458	1.07746																	AAEL014644	51.3799	129.652	2.5234		AAEL010583	0	3.64474
AAEL003746	106.038	107.999	1.01849		AAEL005032	94.9944	146.385	1.54099		AAEL011773	161.979	178.718	1.10334																	AAEL010464	134.857	129.536	0.960543		AAEL005042	0	3.63969
AAEL000185	139.684	142.159	1.01772		AAEL003669	170.592	174.401	1.02233		AAEL007951	154.564	193.938	1.25474																	AAEL010032	69.712	128.872	1.84863		AAEL010816	0	3.63659
AAEL011683	126.052	128.266	1.01756		AAEL003687	112.649	113.291	1.0057		AAEL001005	162.137	173.157	1.06797																	AAEL006115	70.1979	128.806	1.8349		AAEL003149	0	3.63397
AAEL014365	111.283	113.055	1.01592		AAEL003706	99.3725	109.598	1.1029		AAEL007707	317.083	348.447	1.09891																	AAEL008461	104.984	128.016	1.21939		AAEL004281	0	3.63213
AAEL004178	355.069	360.702	1.01586		AAEL014126	131.756	310.314	2.35522		AAEL004978	746.978	846.187	1.13281																	AAEL005435	175.56	127.913	0.7286		AAEL001199	0	3.62385
AAEL017179	133.664	135.677	1.01506		AAEL005192	101.001	234.016	2.31697		AAEL003503	146.205	153.405	1.04925																	AAEL013338	7.8935	127.677	16.175		AAEL007102	0	3.62011
AAEL012629	106.63	108.21	1.01482							AAEL013075	219.745	242.111	1.10178																	AAEL002542	57.8505	127.518	2.20427		AAEL013462	0	3.61887
AAEL000746	113.456	115.124	1.0147							AAEL001715	175.908	188.766	1.0731																	AAEL017263	97.4718	126.436	1.29715		AAEL012389	0	3.60586
AAEL007490	559.133	566.841	1.01379							AAEL017247	564.108	882.907	1.56514																	AAEL005798	148.921	126.016	0.846194		AAEL009491	0	3.60514
AAEL007555	110.223	111.717	1.01355							AAEL008727,AAEL008738	329.982	365.902	1.10885																	AAEL003634	68.6467	125.604	1.82972		AAEL017496	0	3.60453
AAEL007883	163.819	165.983	1.01321							AAEL007078	156.799	160.195	1.02166																	AAEL005269	103.406	125.496	1.21362		AAEL008458	0	3.57825
AAEL001113	180.434	182.769	1.01294							AAEL017144	318.522	569.286	1.78727																	AAEL002813	108.741	124.643	1.14624		AAEL009654	0	3.5688
AAEL002652	264.079	267.341	1.01235							AAEL001964	189.49	231.779	1.22317																	AAEL005957	36.652	124.235	3.38958		AAEL003706	0	3.55709
AAEL002889	2197.73	2216.67	1.00862							AAEL011832	112.628	129.642	1.15106																	AAEL010227	54.8119	123.623	2.2554		AAEL016974	0	3.55418
AAEL002036	132.204	133.215	1.00765							AAEL015682	454.395	1190.67	2.62034																	AAEL004060	79.1382	123.519	1.5608		AAEL008704	0	3.54853
AAEL017455	155.994	157.146	1.00738							AAEL010244	116.659	120.756	1.03512																	AAEL010159	120.047	122.897	1.02374		AAEL010770	0	3.53958
AAEL005292	128.963	129.893	1.00721							AAEL011892	117.917	135.886	1.15239																	AAEL007197	55.8769	122.743	2.19667		AAEL013448	0	3.53468
AAEL013068	136.77	137.702	1.00681							AAEL000415	113.325	115.731	1.02123																	AAEL005337	65.7205	122.385	1.8622		AAEL004432	0	3.52465
AAEL009201	529.317	532.41	1.00584							AAEL013659	148.76	154.443	1.0382																	AAEL001964	37.2959	121.996	3.27103		AAEL014251	0	3.52345
AAEL006138	8887.59	8931.58	1.00495							AAEL007392	135.685	142.65	1.05133																	AAEL012113	145.225	121.677	0.837852		AAEL008385	0	3.51121
AAEL005515	905.058	908.873	1.00422							AAEL005744	149.28	158.773	1.06359																	AAEL013876	52.1369	121.347	2.32747		AAEL012878	0	3.50977
AAEL004691	149.284	149.471	1.00125							AAEL007521	118.268	122.047	1.03195																	AAEL010769	56.8635	121.288	2.13297		AAEL005049	0	3.50245
AAEL002978	190.022	190.19	1.00088							AAEL006851	103.731	123.466	1.19025																	AAEL002597	76.5205	121.141	1.58312		AAEL017160	0	3.49159
AAEL013739	154.889	154.914	1.00016							AAEL013066	107.386	107.465	1.00074																	AAEL009967	58.3954	120.947	2.07117		AAEL004804	0	3.49087
										AAEL002818	109.432	120.557	1.10166																	AAEL008166	132.494	120.747	0.911339		AAEL009223	0	3.47364
										AAEL004017	110.242	115.323	1.04609																	AAEL008106	70.6824	120.477	1.70448		AAEL010649	0	3.46187
										AAEL004450	112.709	134.478	1.19314																	AAEL004071	81.9438	120.431	1.46968		AAEL010010	0	3.4363
										AAEL013128	108.046	111.393	1.03098																	AAEL010056	27.9386	120.32	4.30659		AAEL013839	0	3.43108
										AAEL004419	121.3	122.692	1.01148																	AAEL007236	61.8882	119.605	1.9326		AAEL014229	0	3.42972
										AAEL001810	114.547	116.472	1.01681																	AAEL012069	85.2912	119	1.39522		AAEL009409	0	3.42847
										AAEL002593	125.454	155.088	1.23621																	AAEL004809	63.2209	118.814	1.87935		AAEL014140	0	3.42492
										AAEL003673	353.293	1243.65	3.52017																	AAEL002595	61.1625	117.83	1.92651		AAEL012292	0	3.41695
										AAEL006322	117.39	119.164	1.01511																	AAEL017212	161.199	116.825	0.724725		AAEL004459	0	3.4141
										AAEL009770	137.306	137.476	1.00124																	AAEL001774	220.237	116.714	0.529947		AAEL001043	0	3.39884
										AAEL005922	130.172	135.151	1.03825																	AAEL017195	87.2683	116.66	1.3368		AAEL005723	0	3.39421
										AAEL010506	120.592	122.568	1.01639																	AAEL009510	78.9124	116.317	1.474		AAEL017288	0	3.39149
										AAEL011202	335.851	367.705	1.09485																	AAEL005056	78.9593	116.181	1.4714		AAEL015237	0	3.37413
										AAEL001441	124.716	128.434	1.02981																	AAEL014530	36.7699	115.565	3.14292		AAEL000401	0	3.37067
										AAEL013530	117.4	130	1.10733																	AAEL008887	86.2368	114.426	1.32688		AAEL008729	0	3.36645
										AAEL010585	106.997	115.606	1.08046																	AAEL011381	83.2092	114.038	1.3705		AAEL010507	0	3.36269
										AAEL012086	132.215	191.172	1.44592																	AAEL004691	48.9118	114.029	2.33132		AAEL006969	0	3.36148
										AAEL010402	104.988	115.756	1.10256																	AAEL000175	83.5874	113.834	1.36186		AAEL000487	0	3.35974
										AAEL005332	247.961	395.683	1.59575																	AAEL014039	127.564	113.088	0.88652		AAEL001294	0	3.35563
										AAEL000718	150.012	163.546	1.09022																	AAEL007135	104.662	112.814	1.07789		AAEL011270	0	3.34242
										AAEL015684	183.325	395.858	2.15932																	AAEL010017	86.4433	112.78	1.30467		AAEL013569	0	3.33947
										AAEL015683	118.675	344.281	2.90104																	AAEL007951	25.694	112.767	4.38885		AAEL009983	0	3.33245
										AAEL004223	180.357	219.309	1.21597																	AAEL011051	82.0134	112.508	1.37182		AAEL001836	0	3.33122
										AAEL002121	104.841	146.974	1.40188																	AAEL017030	124.911	111.897	0.895814		AAEL007255	0	3.32019
										AAEL000211	96.4214	107.773	1.11773																	AAEL015458	44.0979	111.309	2.52413		AAEL005132	0	3.32004
										AAEL017334	61.7981	109.651	1.77434																	AAEL002851	85.966	111.267	1.29431		AAEL009611	0	3.29856
										AAEL000410	93.7146	100.645	1.07395																	AAEL003746	67.2774	110.86	1.6478		AAEL002545	0	3.28331
										AAEL000746	89.8859	106.468	1.18448																	AAEL007718	116.276	110.107	0.946945		AAEL017367	0	3.27781
										AAEL006138	6.16495	118.822	19.2738																	AAEL009634	65.7363	109.362	1.66365		AAEL000797	0	3.27112
										AAEL007703	102.494	149.197	1.45567																	AAEL011742	98.3466	109.021	1.10854		AAEL000261	0	3.25536
										AAEL006829	107.526	120.679	1.12232																	AAEL017075	222.266	108.473	0.488032		AAEL013350	0	3.25355
										AAEL007431	81.5271	109.185	1.33925																	AAEL003148	29.7698	107.908	3.62475		AAEL001924	0	3.24423
										AAEL012107	102.777	107.602	1.04695																	AAEL017571	52.2628	107.451	2.05597		AAEL002899	0	3.24241
										AAEL013980	95.1074	110.318	1.15993																	AAEL000670	132.381	106.761	0.806468		AAEL004170	0	3.22042
										AAEL001997	96.872	114.831	1.18539																	AAEL009078	59.622	106.669	1.78909		AAEL011300	0	3.2103
										AAEL006006	103.52	121.34	1.17214																	AAEL011298	11.9662	106.63	8.91093		AAEL000661	0	3.20865
										AAEL014937	100.241	191.389	1.90929																	AAEL001206	89.8736	106.534	1.18538		AAEL003948	0	3.20191
										AAEL007196	104.717	115.6	1.10393																	AAEL004454	32.9147	106.085	3.22303		AAEL014900	0	3.18359
										AAEL000657	91.949	106.718	1.16062																	AAEL000807	74.4667	105.93	1.42252		AAEL011897	0	3.18051
										AAEL011873	80.2827	100.095	1.24678																	AAEL007880	138.468	104.74	0.75642		AAEL002011	0	3.17761
										AAEL011314	100.366	109.38	1.08981																	AAEL013490	56.7408	104.474	1.84125		AAEL017031	0	3.17598
										AAEL000179	115.561	130.041	1.1253																	AAEL001209	80.6078	103.662	1.286		AAEL010666	0	3.17537
										AAEL005709	95.8639	104.864	1.09388																	AAEL003203	100.471	103.483	1.02998		AAEL004555	0	3.17106
										AAEL001264	90.043	103.278	1.14699																	AAEL007494	95.0782	103.298	1.08645		AAEL005675	0	3.16236
										AAEL001247	95.0775	102.267	1.07562																	AAEL002464	47.1055	103.197	2.19076		AAEL012839	0	3.1607
										AAEL017082	95.2385	109.38	1.14849																	AAEL005699	68.244	102.958	1.50867		AAEL017094	0	3.15959
										AAEL009569	98.3919	118.739	1.2068																	AAEL012614	50.0172	102.801	2.05531		AAEL003825	0	3.15906
										AAEL005662	97.3832	102.228	1.04975																	AAEL017245	94.7692	101.525	1.07129		AAEL015523	0	3.15762
										AAEL006458	102.763	121.682	1.1841																	AAEL008723	99.8636	101.38	1.01518		AAEL010412	0	3.1531
										AAEL012235	108.132	109.734	1.01482																	AAEL011102	57.288	101.367	1.76943		AAEL005279	0	3.15301
										AAEL013028	97.1456	109.448	1.12664																	AAEL002081	85.9461	100.653	1.17112		AAEL014372	0	3.14588
										AAEL006952	84.9178	105.021	1.23674																	AAEL007546	90.7658	100.445	1.10664		AAEL013217	0	3.14343
										AAEL000102	99.5352	105.686	1.0618																	AAEL008620	35.5854	100.369	2.82051		AAEL011623	0	3.13759
										AAEL001969	126.763	128.996	1.01762																						AAEL015606	0	3.12711
										AAEL012939	109.192	112.409	1.02946																						AAEL008896	0	3.12606
										AAEL008473	134.545	194.835	1.4481																						AAEL002917	0	3.12133
										AAEL012644	99.6465	138.146	1.38636																						AAEL007399	0	3.11968
										AAEL007371	87.7075	115.059	1.31185																						AAEL015243	0	3.10955
										AAEL001271	71.7885	105.782	1.47352																						AAEL015013	0	3.10912
										AAEL000744	109.272	188.659	1.72651																						AAEL008130	0	3.10391
										AAEL005004	71.9344	198.074	2.75354																						AAEL000209	0	3.10049
																																			AAEL008423	0	3.08868
																																			AAEL005589	0	3.08693
																																			AAEL004800	0	3.08016
																																			AAEL008308	0	3.07756
																																			AAEL012453	0	3.07028
																																			AAEL002730	0	3.06758
																																			AAEL007073	0	3.06709
																																			AAEL012659	0	3.05333
																																			AAEL010327	0	3.03986
																																			AAEL002045	0	3.03921
																																			AAEL008505	0	3.03027
																																			AAEL008407	0	3.02786
																																			AAEL002586	0	3.02528
																																			AAEL008435	0	3.01697
																																			AAEL003051	0	3.01298
																																			AAEL009395	0	3.01244
																																			AAEL004104	0	2.99936
																																			AAEL003966	0	2.99156
																																			AAEL005916	0	2.96981
																																			AAEL011787	0	2.96532
																																			AAEL009688	0	2.96072
																																			AAEL004111	0	2.95973
																																			AAEL006838	0	2.95548
																																			AAEL006203	0	2.9492
																																			AAEL006260	0	2.94395
																																			AAEL000539	0	2.93977
																																			AAEL012416	0	2.93501
																																			AAEL005115	0	2.92746
																																			AAEL013549	0	2.92295
																																			AAEL003356	0	2.90858
																																			AAEL004468	0	2.90568
																																			AAEL003490	0	2.90559
																																			AAEL001559	0	2.89358
																																			AAEL002945	0	2.88735
																																			AAEL012840	0	2.8864
																																			AAEL009315	0	2.87723
																																			AAEL007013	0	2.87693
																																			AAEL006644	0	2.8735
																																			AAEL006338	0	2.87349
																																			AAEL009541	0	2.8702
																																			AAEL009522	0	2.84634
																																			AAEL010492	0	2.83467
																																			AAEL002500	0	2.82411
																																			AAEL005192	0	2.82147
																																			AAEL004695	0	2.81709
																																			AAEL006936	0	2.81174
																																			AAEL002394	0	2.81129
																																			AAEL013201	0	2.79893
																																			AAEL003818	0	2.79224
																																			AAEL003826	0	2.79224
																																			AAEL003851	0	2.79224
																																			AAEL004269	0	2.7905
																																			AAEL014894	0	2.77934
																																			AAEL007960	0	2.77561
																																			AAEL007958	0	2.77541
																																			AAEL006334	0	2.7703
																																			AAEL012566	0	2.76073
																																			AAEL017314	0	2.75928
																																			AAEL010342	0	2.75394
																																			AAEL006715	0	2.74478
																																			AAEL010334	0	2.74449
																																			AAEL007266	0	2.73967
																																			AAEL004271	0	2.73448
																																			AAEL002342	0	2.73264
																																			AAEL017303	0	2.72936
																																			AAEL011807	0	2.72617
																																			AAEL007299	0	2.7251
																																			AAEL001207	0	2.71646
																																			AAEL012418	0	2.71507
																																			AAEL012002	0	2.7145
																																			AAEL013025	0	2.70298
																																			AAEL017097	0	2.70035
																																			AAEL000762	0	2.6998
																																			AAEL006723	0	2.69432
																																			AAEL007171	0	2.68449
																																			AAEL001777	0	2.68321
																																			AAEL009792	0	2.67568
																																			AAEL012919	0	2.67556
																																			AAEL006329	0	2.65664
																																			AAEL011659	0	2.65585
																																			AAEL004315	0	2.65524
																																			AAEL005036	0	2.64913
																																			AAEL015655	0	2.64121
																																			AAEL002071	0	2.64092
																																			AAEL008721	0	2.64059
																																			AAEL010646	0	2.63899
																																			AAEL012011	0	2.63571
																																			AAEL002127	0	2.62578
																																			AAEL017309	0	2.61389
																																			AAEL011130	0	2.61351
																																			AAEL004921	0	2.61279
																																			AAEL004050	0	2.60855
																																			AAEL014092	0	2.60167
																																			AAEL004627	0	2.60095
																																			AAEL011358	0	2.60094
																																			AAEL008772	0	2.59914
																																			AAEL017457	0	2.5922
																																			AAEL012682	0	2.59207
																																			AAEL000303	0	2.59195
																																			AAEL009730	0	2.58712
																																			AAEL002553	0	2.58525
																																			AAEL014339	0	2.58383
																																			AAEL005119	0	2.57739
																																			AAEL013033	0	2.57588
																																			AAEL006750	0	2.57546
																																			AAEL006983	0	2.56956
																																			AAEL005782	0	2.56934
																																			AAEL017039	0	2.55374
																																			AAEL007766	0	2.54958
																																			AAEL009057	0	2.54236
																																			AAEL008396	0	2.53932
																																			AAEL001783	0	2.53495
																																			AAEL005098	0	2.53202
																																			AAEL013254	0	2.53171
																																			AAEL010086	0	2.52541
																																			AAEL008536	0	2.5166
																																			AAEL000664	0	2.51426
																																			AAEL002871	0	2.51168
																																			AAEL014524	0	2.50983
																																			AAEL013166	0	2.50965
																																			AAEL005938	0	2.50763
																																			AAEL014410	0	2.50573
																																			AAEL004718	0	2.50551
																																			AAEL000124	0	2.50266
																																			AAEL013329	0	2.50199
																																			AAEL005462	0	2.49087
																																			AAEL006882	0	2.49075
																																			AAEL015611	0	2.49063
																																			AAEL002554	0	2.49027
																																			AAEL017259	0	2.48957
																																			AAEL014646	0	2.48807
																																			AAEL012892	0	2.48305
																																			AAEL014171	0	2.46995
																																			AAEL005776	0	2.46858
																																			AAEL015256	0	2.46273
																																			AAEL002591	0	2.45446
																																			AAEL006710	0	2.45243
																																			AAEL002785	0	2.44864
																																			AAEL004730	0	2.44809
																																			AAEL003339	0	2.44662
																																			AAEL005015	0	2.44216
																																			AAEL006223	0	2.43931
																																			AAEL016991	0	2.43837
																																			AAEL012454	0	2.43797
																																			AAEL002613	0	2.43703
																																			AAEL012107	0	2.4271
																																			AAEL014712	0	2.42519
																																			AAEL004048	0	2.41764
																																			AAEL000396	0	2.412
																																			AAEL005533	0	2.40703
																																			AAEL013306	0	2.40261
																																			AAEL014228	0	2.40213
																																			AAEL006528	0	2.39277
																																			AAEL000973	0	2.38957
																																			AAEL005791	0	2.38158
																																			AAEL001643	0	2.37904
																																			AAEL004302	0	2.3749
																																			AAEL007580	0	2.3734
																																			AAEL002228	0	2.37036
																																			AAEL007607	0	2.36888
																																			AAEL007711	0	2.35783
																																			AAEL004963	0	2.35139
																																			AAEL004026	0	2.3513
																																			AAEL013824	0	2.3482
																																			AAEL014856	0	2.34411
																																			AAEL009511	0	2.34176
																																			AAEL006170	0	2.34087
																																			AAEL012082	0	2.33954
																																			AAEL006392	0	2.3377
																																			AAEL006884	0	2.33421
																																			AAEL012431	0	2.33205
																																			AAEL013427	0	2.31922
																																			AAEL015372	0	2.31595
																																			AAEL006459	0	2.31426
																																			AAEL009814	0	2.30686
																																			AAEL009986	0	2.30047
																																			AAEL017168	0	2.28401
																																			AAEL005619	0	2.27677
																																			AAEL010482	0	2.27629
																																			AAEL004909	0	2.2756
																																			AAEL001192	0	2.27551
																																			AAEL002451	0	2.26541
																																			AAEL013399	0	2.26524
																																			AAEL017351	0	2.2635
																																			AAEL012759	0	2.25662
																																			AAEL016999	0	2.25496
																																			AAEL004333	0	2.25493
																																			AAEL004746	0	2.24649
																																			AAEL009753	0	2.23173
																																			AAEL010046	0	2.23038
																																			AAEL002564	0	2.227
																																			AAEL003981	0	2.22136
																																			AAEL004571	0	2.22097
																																			AAEL014615	0	2.21184
																																			AAEL012864	0	2.21094
																																			AAEL017002	0	2.21057
																																			AAEL013295	0	2.20508
																																			AAEL006865	0	2.20246
																																			AAEL011159	0	2.19204
																																			AAEL011356	0	2.19098
																																			AAEL013587	0	2.18805
																																			AAEL009180	0	2.18727
																																			AAEL014386	0	2.17721
																																			AAEL008161	0	2.17249
																																			AAEL011864	0	2.1679
																																			AAEL011887	0	2.16784
																																			AAEL004238	0	2.15386
																																			AAEL011653	0	2.14844
																																			AAEL013823	0	2.14645
																																			AAEL015567	0	2.1408
																																			AAEL007932	0	2.13177
																																			AAEL005242	0	2.12389
																																			AAEL000449	0	2.10778
																																			AAEL006316	0	2.10777
																																			AAEL000935	0	2.10692
																																			AAEL014391	0	2.1017
																																			AAEL005753	0	2.0955
																																			AAEL001857	0	2.0929
																																			AAEL000133	0	2.08955
																																			AAEL014105	0	2.08159
																																			AAEL003472	0	2.07007
																																			AAEL002402	0	2.05635
																																			AAEL003726	0	2.05128
																																			AAEL010381	0	2.04955
																																			AAEL004508	0	2.04836
																																			AAEL005465	0	2.0476
																																			AAEL013728	0	2.03211
																																			AAEL011053	0	2.01977
																																			AAEL003048	0	2.01837
																																			AAEL006871	0	2.00863
																																			AAEL007006	0	2.00852
																																			AAEL008307	0	1.99907
																																			AAEL000560	0	1.99873
																																			AAEL011976	0	1.99551
																																			AAEL007757	0	1.99233
																																			AAEL005111	0	1.99201
																																			AAEL002556	0	1.97685
																																			AAEL011257	0	1.97679
																																			AAEL003058	0	1.97549
																																			AAEL000496	0	1.9702
																																			AAEL010808	0	1.9701
																																			AAEL014483	0	1.96644
																																			AAEL016977	0	1.96021
																																			AAEL005554	0	1.96002
																																			AAEL010600	0	1.95837
																																			AAEL006767	0	1.95565
																																			AAEL007855	0	1.95553
																																			AAEL010753	0	1.95343
																																			AAEL013432	0	1.95251
																																			AAEL001727	0	1.95014
																																			AAEL001756	0	1.9501
																																			AAEL014706	0	1.94924
																																			AAEL010670	0	1.94766
																																			AAEL001592	0	1.94473
																																			AAEL014832	0	1.94376
																																			AAEL012782	0	1.94242
																																			AAEL006985	0	1.93738
																																			AAEL012188	0	1.93264
																																			AAEL009880	0	1.92117
																																			AAEL003195	0	1.91821
																																			AAEL012314	0	1.91737
																																			AAEL004610	0	1.90589
																																			AAEL001367	0	1.90564
																																			AAEL014043	0	1.89685
																																			AAEL014245	0	1.8954
																																			AAEL006926	0	1.88749
																																			AAEL013830	0	1.8866
																																			AAEL014333	0	1.8824
																																			AAEL006298	0	1.88057
																																			AAEL006348	0	1.87949
																																			AAEL012263	0	1.87906
																																			AAEL017426	0	1.87754
																																			AAEL009639	0	1.87658
																																			AAEL006482	0	1.87638
																																			AAEL013194	0	1.87501
																																			AAEL014440	0	1.8684
																																			AAEL003648	0	1.86825
																																			AAEL013001	0	1.8621
																																			AAEL000116	0	1.85859
																																			AAEL011612	0	1.85442
																																			AAEL000283	0	1.84945
																																			AAEL013232	0	1.84881
																																			AAEL017180	0	1.843
																																			AAEL000499	0	1.84058
																																			AAEL010938	0	1.84055
																																			AAEL000306	0	1.83927
																																			AAEL005941	0	1.83924
																																			AAEL012708	0	1.83908
																																			AAEL007232	0	1.83708
																																			AAEL014718	0	1.83119
																																			AAEL015326	0	1.82887
																																			AAEL005189	0	1.82568
																																			AAEL001288	0	1.82546
																																			AAEL009962	0	1.81878
																																			AAEL012089	0	1.80952
																																			AAEL000201	0	1.80837
																																			AAEL012006	0	1.8067
																																			AAEL011874	0	1.80442
																																			AAEL002991	0	1.80234
																																			AAEL015553	0	1.79697
																																			AAEL013417	0	1.79492
																																			AAEL012906	0	1.78894
																																			AAEL001320	0	1.78558
																																			AAEL007563	0	1.78551
																																			AAEL011798	0	1.78179
																																			AAEL013813	0	1.78115
																																			AAEL007789	0	1.77164
																																			AAEL005812	0	1.76552
																																			AAEL011705	0	1.76515
																																			AAEL002310	0	1.76395
																																			AAEL004361	0	1.76232
																																			AAEL006548	0	1.75961
																																			AAEL004935	0	1.75956
																																			AAEL005838	0	1.75884
																																			AAEL000755	0	1.75502
																																			AAEL017127	0	1.75237
																																			AAEL009149	0	1.75155
																																			AAEL002250	0	1.74682
																																			AAEL007105	0	1.74529
																																			AAEL001323	0	1.74287
																																			AAEL012999	0	1.74241
																																			AAEL005624	0	1.74132
																																			AAEL003224	0	1.73629
																																			AAEL017120	0	1.73206
																																			AAEL009923	0	1.72723
																																			AAEL015060	0	1.72303
																																			AAEL004698	0	1.71972
																																			AAEL013351	0	1.71638
																																			AAEL007838	0	1.71053
																																			AAEL010398	0	1.70969
																																			AAEL008092	0	1.7086
																																			AAEL007814	0	1.7077
																																			AAEL003612	0	1.70136
																																			AAEL004826	0	1.70028
																																			AAEL011649	0	1.6995
																																			AAEL005199	0	1.69506
																																			AAEL004250	0	1.69187
																																			AAEL010544	0	1.69107
																																			AAEL015129,AAEL015130	0	1.68639
																																			AAEL009513	0	1.68606
																																			AAEL006268	0	1.68555
																																			AAEL016979	0	1.68553
																																			AAEL000390	0	1.67637
																																			AAEL002320	0	1.67591
																																			AAEL012474	0	1.67405
																																			AAEL005765	0	1.67286
																																			AAEL009515	0	1.67072
																																			AAEL007216	0	1.66828
																																			AAEL005232	0	1.66763
																																			AAEL000251	0	1.66436
																																			AAEL013070	0	1.66423
																																			AAEL000029	0	1.65843
																																			AAEL007686	0	1.6583
																																			AAEL002291	0	1.65805
																																			AAEL007052	0	1.6485
																																			AAEL006892	0	1.64106
																																			AAEL003272	0	1.64047
																																			AAEL001988	0	1.62791
																																			AAEL002116	0	1.62774
																																			AAEL014257	0	1.62624
																																			AAEL013332	0	1.62527
																																			AAEL005443	0	1.62185
																																			AAEL000780	0	1.62084
																																			AAEL001203	0	1.61895
																																			AAEL012176	0	1.61702
																																			AAEL000040	0	1.61281
																																			AAEL011516	0	1.61093
																																			AAEL001110	0	1.61035
																																			AAEL002060	0	1.60942
																																			AAEL003047	0	1.6077
																																			AAEL005466	0	1.59707
																																			AAEL003304	0	1.59494
																																			AAEL016986	0	1.59463
																																			AAEL010115	0	1.59456
																																			AAEL011432	0	1.59393
																																			AAEL007606	0	1.59306
																																			AAEL001744	0	1.58409
																																			AAEL005792	0	1.58403
																																			AAEL010239	0	1.58402
																																			AAEL012772	0	1.58092
																																			AAEL006109	0	1.57712
																																			AAEL006293	0	1.57638
																																			AAEL000053	0	1.57559
																																			AAEL003700	0	1.5678
																																			AAEL011365	0	1.56657
																																			AAEL003773	0	1.56457
																																			AAEL009218	0	1.55961
																																			AAEL011862	0	1.55832
																																			AAEL000035	0	1.5499
																																			AAEL004283	0	1.54979
																																			AAEL001730	0	1.54058
																																			AAEL012625	0	1.53992
																																			AAEL011463	0	1.53642
																																			AAEL017444	0	1.53561
																																			AAEL001374	0	1.52569
																																			AAEL007458	0	1.52198
																																			AAEL003951	0	1.51836
																																			AAEL003760	0	1.51481
																																			AAEL000954	0	1.51205
																																			AAEL003722	0	1.51107
																																			AAEL001162	0	1.50941
																																			AAEL008125	0	1.50857
																																			AAEL004391	0	1.50496
																																			AAEL007744	0	1.503
																																			AAEL013469	0	1.50109
																																			AAEL001274	0	1.49913
																																			AAEL007894	0	1.49723
																																			AAEL009418	0	1.49464
																																			AAEL004014	0	1.49239
																																			AAEL010499	0	1.49137
																																			AAEL013165	0	1.48664
																																			AAEL006683	0	1.48212
																																			AAEL003027	0	1.48131
																																			AAEL014049	0	1.47968
																																			AAEL010719	0	1.47534
																																			AAEL014431	0	1.47358
																																			AAEL014052	0	1.4722
																																			AAEL006827	0	1.47176
																																			AAEL014380	0	1.46849
																																			AAEL003861	0	1.46773
																																			AAEL014061	0	1.46269
																																			AAEL005360	0	1.45729
																																			AAEL007250	0	1.45527
																																			AAEL015521	0	1.45258
																																			AAEL007045	0	1.44378
																																			AAEL011423	0	1.44346
																																			AAEL012058	0	1.44136
																																			AAEL009488	0	1.43667
																																			AAEL011735	0	1.43548
																																			AAEL008547	0	1.43507
																																			AAEL003292	0	1.43432
																																			AAEL014206	0	1.43422
																																			AAEL017167	0	1.42647
																																			AAEL013271	0	1.42614
																																			AAEL001628	0	1.42441
																																			AAEL011839	0	1.41408
																																			AAEL008038	0	1.41387
																																			AAEL009103	0	1.4113
																																			AAEL004655	0	1.40604
																																			AAEL009605	0	1.40587
																																			AAEL001262	0	1.40132
																																			AAEL006237	0	1.39342
																																			AAEL012563	0	1.39339
																																			AAEL007540	0	1.39268
																																			AAEL003219	0	1.39265
																																			AAEL002973	0	1.39073
																																			AAEL009256	0	1.39045
																																			AAEL011615	0	1.38241
																																			AAEL006241	0	1.38014
																																			AAEL005101	0	1.37906
																																			AAEL008256	0	1.37773
																																			AAEL007475	0	1.37663
																																			AAEL011872	0	1.37193
																																			AAEL007123	0	1.37033
																																			AAEL005519	0	1.36915
																																			AAEL003961	0	1.36629
																																			AAEL008287	0	1.36476
																																			AAEL006198	0	1.36456
																																			AAEL013940	0	1.36432
																																			AAEL009718	0	1.36391
																																			AAEL004135	0	1.36254
																																			AAEL014881	0	1.3609
																																			AAEL001090	0	1.35874
																																			AAEL000267	0	1.35738
																																			AAEL017373	0	1.35546
																																			AAEL003784	0	1.35433
																																			AAEL003516	0	1.3529
																																			AAEL000456	0	1.35273
																																			AAEL000187	0	1.34931
																																			AAEL014840	0	1.346
																																			AAEL017100	0	1.34552
																																			AAEL000576	0	1.34066
																																			AAEL009749	0	1.33973
																																			AAEL005905	0	1.33749
																																			AAEL002649	0	1.33513
																																			AAEL004106	0	1.33385
																																			AAEL013259	0	1.33067
																																			AAEL008433	0	1.32807
																																			AAEL005855	0	1.32433
																																			AAEL008476	0	1.32378
																																			AAEL009270	0	1.32316
																																			AAEL009334	0	1.31838
																																			AAEL007602	0	1.31836
																																			AAEL011448	0	1.31815
																																			AAEL004295	0	1.3181
																																			AAEL011359	0	1.31719
																																			AAEL005650	0	1.31594
																																			AAEL015270	0	1.31002
																																			AAEL005737	0	1.30364
																																			AAEL005664	0	1.3036
																																			AAEL002364	0	1.30061
																																			AAEL012959	0	1.30038
																																			AAEL009347	0	1.29954
																																			AAEL010269	0	1.29924
																																			AAEL000656	0	1.29368
																																			AAEL014047	0	1.29274
																																			AAEL013766	0	1.29228
																																			AAEL014623	0	1.29091
																																			AAEL011715	0	1.29043
																																			AAEL008493	0	1.28782
																																			AAEL005974	0	1.28514
																																			AAEL008118	0	1.28203
																																			AAEL004163	0	1.28149
																																			AAEL006631	0	1.2803
																																			AAEL006107	0	1.27798
																																			AAEL007109	0	1.27449
																																			AAEL010904	0	1.27069
																																			AAEL017254	0	1.26905
																																			AAEL000168	0	1.2672
																																			AAEL013344	0	1.26531
																																			AAEL004318	0	1.26109
																																			AAEL011210	0	1.26109
																																			AAEL006923	0	1.26072
																																			AAEL001766	0	1.25313
																																			AAEL005894	0	1.25299
																																			AAEL011452	0	1.25209
																																			AAEL006995	0	1.25139
																																			AAEL008053	0	1.25081
																																			AAEL017172	0	1.25028
																																			AAEL013185	0	1.24932
																																			AAEL003775,AAEL003793	0	1.24898
																																			AAEL004948	0	1.24575
																																			AAEL006164	0	1.24222
																																			AAEL015570	0	1.23923
																																			AAEL010445	0	1.2387
																																			AAEL000781	0	1.23764
																																			AAEL003017	0	1.23706
																																			AAEL003251	0	1.2367
																																			AAEL006204	0	1.23559
																																			AAEL002926	0	1.23344
																																			AAEL009238	0	1.22814
																																			AAEL001368	0	1.22627
																																			AAEL006695	0	1.22483
																																			AAEL005777	0	1.22403
																																			AAEL009187	0	1.21893
																																			AAEL008559	0	1.21425
																																			AAEL009990	0	1.21294
																																			AAEL002447	0	1.21088
																																			AAEL006898	0	1.21071
																																			AAEL004487	0	1.21049
																																			AAEL002067	0	1.20645
																																			AAEL013204	0	1.20599
																																			AAEL012844	0	1.20366
																																			AAEL012650	0	1.20313
																																			AAEL011561	0	1.20116
																																			AAEL013572	0	1.19854
																																			AAEL000260	0	1.19819
																																			AAEL001739	0	1.19627
																																			AAEL010924	0	1.19024
																																			AAEL002763	0	1.189
																																			AAEL004383	0	1.18843
																																			AAEL003545	0	1.18643
																																			AAEL013335	0	1.1856
																																			AAEL001793	0	1.18218
																																			AAEL004606	0	1.18117
																																			AAEL009602	0	1.1801
																																			AAEL007955	0	1.17422
																																			AAEL007412	0	1.17313
																																			AAEL015599	0	1.17271
																																			AAEL005363	0	1.1727
																																			AAEL001966	0	1.17244
																																			AAEL003657	0	1.17151
																																			AAEL004377	0	1.16879
																																			AAEL000912	0	1.16524
																																			AAEL002858	0	1.16396
																																			AAEL015121	0	1.16117
																																			AAEL003563	0	1.16047
																																			AAEL009359	0	1.16035
																																			AAEL001915	0	1.15775
																																			AAEL000584	0	1.15372
																																			AAEL012834	0	1.15252
																																			AAEL008758	0	1.15022
																																			AAEL004241	0	1.14915
																																			AAEL011845	0	1.14164
																																			AAEL013733	0	1.14068
																																			AAEL004609	0	1.13566
																																			AAEL009435	0	1.13464
																																			AAEL007295	0	1.13418
																																			AAEL003207	0	1.13162
																																			AAEL008286	0	1.12784
																																			AAEL009755	0	1.12734
																																			AAEL003549	0	1.12101
																																			AAEL003378	0	1.11819
																																			AAEL017393	0	1.11809
																																			AAEL014385	0	1.11784
																																			AAEL005681	0	1.11743
																																			AAEL000563	0	1.116
																																			AAEL009996	0	1.11194
																																			AAEL013216	0	1.11154
																																			AAEL010845	0	1.11103
																																			AAEL008538	0	1.10882
																																			AAEL012777	0	1.10817
																																			AAEL002515	0	1.10298
																																			AAEL001060	0	1.10238
																																			AAEL012872	0	1.09823
																																			AAEL008301	0	1.09103
																																			AAEL006759	0	1.08939
																																			AAEL010831	0	1.08818
																																			AAEL001922	0	1.08444
																																			AAEL010489	0	1.08188
																																			AAEL000420	0	1.07624
																																			AAEL006252	0	1.07415
																																			AAEL004299	0	1.07158
																																			AAEL007975	0	1.06753
																																			AAEL010240	0	1.06619
																																			AAEL004093	0	1.06589
																																			AAEL002806	0	1.06502
																																			AAEL003947	0	1.0634
																																			AAEL001079	0	1.06333
																																			AAEL010775	0	1.06306
																																			AAEL013918	0	1.05826
																																			AAEL010343	0	1.05528
																																			AAEL007783	0	1.054
																																			AAEL007046	0	1.04822
																																			AAEL014852	0	1.04138
																																			AAEL002975	0	1.04116
																																			AAEL003052	0	1.04027
																																			AAEL017110	0	1.04027
																																			AAEL000298	0	1.03983
																																			AAEL005288	0	1.0391
																																			AAEL004537	0	1.03719
																																			AAEL007806	0	1.0338
																																			AAEL007324	0	1.02938
																																			AAEL013853	0	1.02894
																																			AAEL003719	0	1.02684
																																			AAEL002022	0	1.02564
																																			AAEL013799	0	1.02536
																																			AAEL006398	0	1.02384
																																			AAEL013762	0	1.02262
																																			AAEL011768	0	1.02183
																																			AAEL010444	0	1.02155
																																			AAEL009999	0	1.02111
																																			AAEL017422	0	1.02047
																																			AAEL012811	0	1.01665
																																			AAEL010708	0	1.01523
																																			AAEL002491	0	1.01403
																																			AAEL000341	0	1.01246
																																			AAEL002821,AAEL002830	0	1.01201
																																			AAEL003124	0	1.00846
																																			AAEL007231	0	1.00636
																																			AAEL010389	0	1.00602
																																			AAEL005549	0	1.00593
																																			AAEL011142	0	1.00432
																																			AAEL004066	0	1.00431
																																			AAEL013545	0	1.00118
																																			AAEL005697	0	1.00058
																																			AAEL015233	0	0.998823
																																			AAEL000123	0	0.996652
																																			AAEL015332	0	0.993055
																																			AAEL007896	0	0.990121
																																			AAEL000818	0	0.988231
																																			AAEL006618	0	0.986568
																																			AAEL005470	0	0.986465
																																			AAEL015080	0	0.9819
																																			AAEL006796	0	0.981137
																																			AAEL000768	0	0.98068
																																			AAEL010030	0	0.979324
																																			AAEL007716	0	0.977558
																																			AAEL001457	0	0.977483
																																			AAEL012468,AAEL012470	0	0.977111
																																			AAEL007436	0	0.977045
																																			AAEL006533	0	0.976688
																																			AAEL017446	0	0.976507
																																			AAEL014538	0	0.973692
																																			AAEL014758	0	0.971572
																																			AAEL008537	0	0.971473
																																			AAEL005572	0	0.968796
																																			AAEL012432	0	0.968612
																																			AAEL006556	0	0.964745
																																			AAEL008359	0	0.962764
																																			AAEL010477	0	0.962118
																																			AAEL002284	0	0.960369
																																			AAEL008401	0	0.957814
																																			AAEL006106	0	0.955426
																																			AAEL009296	0	0.951553
																																			AAEL007654	0	0.949901
																																			AAEL011885	0	0.949
																																			AAEL008245	0	0.94419
																																			AAEL005028	0	0.941608
																																			AAEL014839	0	0.941013
																																			AAEL011026	0	0.939894
																																			AAEL012124	0	0.939559
																																			AAEL013317	0	0.937725
																																			AAEL010910	0	0.937177
																																			AAEL013224	0	0.934425
																																			AAEL011454	0	0.93111
																																			AAEL015127	0	0.930026
																																			AAEL010104	0	0.930021
																																			AAEL001625	0	0.928663
																																			AAEL012391	0	0.922968
																																			AAEL003252	0	0.918625
																																			AAEL009064	0	0.915993
																																			AAEL004008	0	0.912213
																																			AAEL017051	0	0.912207
																																			AAEL007128	0	0.911108
																																			AAEL003566	0	0.910216
																																			AAEL014696	0	0.908649
																																			AAEL013239	0	0.907647
																																			AAEL013852	0	0.907062
																																			AAEL015453	0	0.903065
																																			AAEL003199	0	0.898766
																																			AAEL005668	0	0.898333
																																			AAEL002195	0	0.898312
																																			AAEL013156	0	0.895764
																																			AAEL004894	0	0.893112
																																			AAEL003520	0	0.891564
																																			AAEL009578	0	0.889408
																																			AAEL012572	0	0.888403
																																			AAEL011138	0	0.887549
																																			AAEL015128	0	0.88642
																																			AAEL005286	0	0.885713
																																			AAEL011078	0	0.885245
																																			AAEL012449	0	0.884856
																																			AAEL012683	0	0.883922
																																			AAEL014276	0	0.882588
																																			AAEL007963	0	0.88237
																																			AAEL011238	0	0.880348
																																			AAEL013122	0	0.878255
																																			AAEL010358	0	0.877681
																																			AAEL007244	0	0.874711
																																			AAEL012275	0	0.874531
																																			AAEL007393	0	0.872179
																																			AAEL004145	0	0.871109
																																			AAEL009473	0	0.870765
																																			AAEL000810	0	0.870671
																																			AAEL008268	0	0.869346
																																			AAEL002357	0	0.869272
																																			AAEL000249	0	0.869169
																																			AAEL004094	0	0.865913
																																			AAEL013680	0	0.864874
																																			AAEL011616	0	0.862371
																																			AAEL007168	0	0.860683
																																			AAEL011400	0	0.860265
																																			AAEL002574	0	0.859338
																																			AAEL004155	0	0.858948
																																			AAEL014990	0	0.858211
																																			AAEL005275	0	0.856818
																																			AAEL010033	0	0.856773
																																			AAEL012068	0	0.855874
																																			AAEL005138	0	0.855492
																																			AAEL003260	0	0.853007
																																			AAEL006093	0	0.85125
																																			AAEL002773	0	0.850711
																																			AAEL005350	0	0.847621
																																			AAEL000868	0	0.84615
																																			AAEL005783	0	0.845873
																																			AAEL002088	0	0.843429
																																			AAEL002921	0	0.840817
																																			AAEL002072	0	0.840106
																																			AAEL006878	0	0.839309
																																			AAEL009904	0	0.835902
																																			AAEL006058	0	0.834422
																																			AAEL011141	0	0.833186
																																			AAEL014300	0	0.833052
																																			AAEL000161	0	0.831808
																																			AAEL007438	0	0.831473
																																			AAEL016965	0	0.831276
																																			AAEL013154	0	0.830172
																																			AAEL001737	0	0.828694
																																			AAEL012392	0	0.826636
																																			AAEL014493	0	0.825406
																																			AAEL002894	0	0.821684
																																			AAEL001433	0	0.8215
																																			AAEL004723	0	0.819919
																																			AAEL005577	0	0.819695
																																			AAEL011695	0	0.819577
																																			AAEL003305	0	0.818338
																																			AAEL013552	0	0.817596
																																			AAEL002726	0	0.816091
																																			AAEL009438	0	0.811609
																																			AAEL012838	0	0.810542
																																			AAEL015171	0	0.810341
																																			AAEL008460	0	0.809356
																																			AAEL003216	0	0.808599
																																			AAEL007361	0	0.805583
																																			AAEL000026	0	0.804567
																																			AAEL000896	0	0.803918
																																			AAEL010370	0	0.800724
																																			AAEL013237	0	0.796997
																																			AAEL011008	0	0.795929
																																			AAEL008035	0	0.793511
																																			AAEL009300	0	0.79324
																																			AAEL009669	0	0.792283
																																			AAEL012085	0	0.791842
																																			AAEL000327	0	0.79121
																																			AAEL009058	0	0.790564
																																			AAEL013336	0	0.790377
																																			AAEL002775	0	0.789121
																																			AAEL004614	0	0.787083
																																			AAEL015012	0	0.786217
																																			AAEL015232	0	0.785298
																																			AAEL010105	0	0.784746
																																			AAEL003888	0	0.784727
																																			AAEL007413	0	0.783512
																																			AAEL014321	0	0.782814
																																			AAEL014338	0	0.782428
																																			AAEL006123	0	0.780477
																																			AAEL010785	0	0.778447
																																			AAEL015672	0	0.776973
																																			AAEL010283	0	0.773227
																																			AAEL009710	0	0.772008
																																			AAEL000806	0	0.768152
																																			AAEL004082	0	0.767019
																																			AAEL000960	0	0.766234
																																			AAEL011108	0	0.763715
																																			AAEL007133	0	0.763341
																																			AAEL003742	0	0.763294
																																			AAEL002262	0	0.762936
																																			AAEL004552	0	0.761456
																																			AAEL004160	0	0.75975
																																			AAEL010729	0	0.759728
																																			AAEL007829	0	0.758152
																																			AAEL002518	0	0.757645
																																			AAEL013651	0	0.757134
																																			AAEL007131	0	0.756199
																																			AAEL013493	0	0.754743
																																			AAEL007785	0	0.754356
																																			AAEL005747	0	0.750884
																																			AAEL003319	0	0.750431
																																			AAEL007212	0	0.748616
																																			AAEL015600	0	0.747874
																																			AAEL015200	0	0.745991
																																			AAEL012328	0	0.74179
																																			AAEL011039	0	0.739662
																																			AAEL007954	0	0.739438
																																			AAEL009987	0	0.73708
																																			AAEL014293	0	0.736629
																																			AAEL013376	0	0.736055
																																			AAEL017348	0	0.735538
																																			AAEL014756	0	0.735032
																																			AAEL012414	0	0.733743
																																			AAEL004806	0	0.733646
																																			AAEL014090	0	0.733512
																																			AAEL015563	0	0.733388
																																			AAEL001697	0	0.731061
																																			AAEL013957	0	0.730193
																																			AAEL011702	0	0.725908
																																			AAEL002859	0	0.724378
																																			AAEL004443	0	0.723947
																																			AAEL013303	0	0.72317
																																			AAEL013019	0	0.719996
																																			AAEL004528	0	0.717549
																																			AAEL011144	0	0.716512
																																			AAEL006657	0	0.715251
																																			AAEL011398	0	0.715175
																																			AAEL000765	0	0.714605
																																			AAEL007956	0	0.714526
																																			AAEL015618	0	0.713858
																																			AAEL005026	0	0.71376
																																			AAEL013754	0	0.71304
																																			AAEL004672	0	0.711168
																																			AAEL017539	0	0.71088
																																			AAEL004644	0	0.710593
																																			AAEL006112	0	0.709368
																																			AAEL017443	0	0.70741
																																			AAEL003663	0	0.70699
																																			AAEL008524	0	0.705143
																																			AAEL009977	0	0.703621
																																			AAEL002173	0	0.699965
																																			AAEL006399	0	0.695712
																																			AAEL009965	0	0.694809
																																			AAEL007875	0	0.69345
																																			AAEL005983	0	0.69282
																																			AAEL004352	0	0.691707
																																			AAEL004601	0	0.69094
																																			AAEL003821	0	0.684319
																																			AAEL014306	0	0.684308
																																			AAEL015375	0	0.678423
																																			AAEL005718	0	0.677382
																																			AAEL014304	0	0.676647
																																			AAEL009360	0	0.671178
																																			AAEL010856	0	0.666903
																																			AAEL006354	0	0.665881
																																			AAEL007887	0	0.664624
																																			AAEL007364	0	0.66455
																																			AAEL007338	0	0.664539
																																			AAEL015048	0	0.663921
																																			AAEL012333	0	0.663602
																																			AAEL002348	0	0.662108
																																			AAEL002367	0	0.661361
																																			AAEL005207	0	0.659786
																																			AAEL014487	0	0.65821
																																			AAEL001111	0	0.652728
																																			AAEL015495	0	0.649512
																																			AAEL017015	0	0.649505
																																			AAEL008839	0	0.646843
																																			AAEL004314	0	0.64566
																																			AAEL001026	0	0.64475
																																			AAEL006297	0	0.644431
																																			AAEL008865	0	0.639998
																																			AAEL003485	0	0.637288
																																			AAEL012889	0	0.636026
																																			AAEL014062	0	0.633234
																																			AAEL014910	0	0.633191
																																			AAEL008944	0	0.632624
																																			AAEL003978	0	0.63196
																																			AAEL014387	0	0.631756
																																			AAEL002509	0	0.631068
																																			AAEL003625	0	0.630972
																																			AAEL014056	0	0.630373
																																			AAEL004089	0	0.630223
																																			AAEL007234	0	0.629321
																																			AAEL013457	0	0.626801
																																			AAEL008112	0	0.626799
																																			AAEL007627	0	0.626697
																																			AAEL006110	0	0.625164
																																			AAEL003867	0	0.623874
																																			AAEL013763	0	0.623365
																																			AAEL003262	0	0.623248
																																			AAEL004360	0	0.616633
																																			AAEL011654	0	0.613435
																																			AAEL000288	0	0.613386
																																			AAEL009714	0	0.611718
																																			AAEL004898	0	0.610846
																																			AAEL004429	0	0.610654
																																			AAEL012384	0	0.608148
																																			AAEL000817	0	0.60801
																																			AAEL014574	0	0.607546
																																			AAEL004159	0	0.606567
																																			AAEL012373	0	0.604253
																																			AAEL015044	0	0.602153
																																			AAEL007978	0	0.601646
																																			AAEL000192	0	0.600755
																																			AAEL015183	0	0.600421
																																			AAEL007935	0	0.596656
																																			AAEL001127	0	0.596121
																																			AAEL006478	0	0.595091
																																			AAEL017343	0	0.593669
																																			AAEL006607	0	0.593353
																																			AAEL003692	0	0.593118
																																			AAEL008568	0	0.592901
																																			AAEL002920	0	0.587531
																																			AAEL006335	0	0.587312
																																			AAEL014496	0	0.586867
																																			AAEL014714	0	0.586804
																																			AAEL004880	0	0.586668
																																			AAEL003691	0	0.583835
																																			AAEL014145	0	0.579808
																																			AAEL006156	0	0.579201
																																			AAEL004213	0	0.579183
																																			AAEL002643	0	0.577309
																																			AAEL003294	0	0.57702
																																			AAEL004821	0	0.576811
																																			AAEL005274	0	0.576528
																																			AAEL017399	0	0.575538
																																			AAEL006584	0	0.575345
																																			AAEL005654	0	0.574018
																																			AAEL012699	0	0.573808
																																			AAEL000893	0	0.573006
																																			AAEL002321	0	0.572053
																																			AAEL006593	0	0.571012
																																			AAEL017283	0	0.570275
																																			AAEL005724	0	0.568583
																																			AAEL001799	0	0.568469
																																			AAEL013973	0	0.567983
																																			AAEL001042	0	0.565484
																																			AAEL009227	0	0.563033
																																			AAEL014485	0	0.562895
																																			AAEL008817	0	0.562014
																																			AAEL012371	0	0.559863
																																			AAEL002103	0	0.557997
																																			AAEL000971	0	0.557276
																																			AAEL011846	0	0.555832
																																			AAEL012639	0	0.553872
																																			AAEL010092	0	0.548958
																																			AAEL000723	0	0.548468
																																			AAEL014404	0	0.547915
																																			AAEL007840	0	0.54632
																																			AAEL011040	0	0.546184
																																			AAEL009252	0	0.545685
																																			AAEL010021	0	0.545511
																																			AAEL012104	0	0.544318
																																			AAEL004273	0	0.544312
																																			AAEL012922	0	0.541006
																																			AAEL005587	0	0.540167
																																			AAEL013497	0	0.539742
																																			AAEL005657	0	0.538724
																																			AAEL007934	0	0.537296
																																			AAEL010786	0	0.534083
																																			AAEL007737	0	0.531176
																																			AAEL010106	0	0.530284
																																			AAEL004996	0	0.528952
																																			AAEL009335	0	0.527852
																																			AAEL001500	0	0.526797
																																			AAEL007227	0	0.526754
																																			AAEL007152	0	0.525836
																																			AAEL010285	0	0.522686
																																			AAEL002423	0	0.521741
																																			AAEL000853	0	0.521511
																																			AAEL013690	0	0.521288
																																			AAEL015604	0	0.519507
																																			AAEL015081	0	0.519489
																																			AAEL004000	0	0.515974
																																			AAEL009943	0	0.511069
																																			AAEL007262	0	0.509903
																																			AAEL014912	0	0.509325
																																			AAEL012794	0	0.504886
																																			AAEL014371	0	0.503929
																																			AAEL005076	0	0.502711
																																			AAEL007025	0	0.501871
																																			AAEL013634	0	0.501604
																																			AAEL011427	0	0.500907
																																			AAEL013851	0	0.498386
																																			AAEL003529	0	0.497696
																																			AAEL015336	0	0.496461
																																			AAEL003308	0	0.495849
																																			AAEL014181	0	0.495133
																																			AAEL013504	0	0.494008
																																			AAEL009211	0	0.493551
																																			AAEL007839	0	0.490432
																																			AAEL008884	0	0.489123
																																			AAEL015067	0	0.487556
																																			AAEL005584	0	0.486842
																																			AAEL007081	0	0.486358
																																			AAEL011066	0	0.485396
																																			AAEL010710	0	0.483932
																																			AAEL015537	0	0.48389
																																			AAEL005433	0	0.483387
																																			AAEL005105	0	0.482342
																																			AAEL013544	0	0.48208
																																			AAEL012399	0	0.482029
																																			AAEL001747	0	0.481284
																																			AAEL005614	0	0.479063
																																			AAEL014267	0	0.478901
																																			AAEL011699	0	0.478521
																																			AAEL015170	0	0.477134
																																			AAEL004819	0	0.476875
																																			AAEL003557	0	0.475532
																																			AAEL017131	0	0.474295
																																			AAEL000387	0	0.471455
																																			AAEL000535	0	0.470143
																																			AAEL001789	0	0.468715
																																			AAEL003127	0	0.467976
																																			AAEL007878	0	0.467577
																																			AAEL011840	0	0.466875
																																			AAEL002303	0	0.466513
																																			AAEL008660	0	0.466108
																																			AAEL000595	0	0.465319
																																			AAEL002740	0	0.464585
																																			AAEL015307	0	0.462629
																																			AAEL009083	0	0.461865
																																			AAEL005297	0	0.460202
																																			AAEL004775	0	0.457232
																																			AAEL006999	0	0.455346
																																			AAEL015394	0	0.45504
																																			AAEL008759	0	0.454124
																																			AAEL014176	0	0.45343
																																			AAEL013118	0	0.447557
																																			AAEL014603	0	0.44657
																																			AAEL005703	0	0.445149
																																			AAEL002281	0	0.443487
																																			AAEL004389	0	0.442887
																																			AAEL015659	0	0.441958
																																			AAEL013752	0	0.439954
																																			AAEL005063	0	0.438729
																																			AAEL015148	0	0.438293
																																			AAEL004992	0	0.438126
																																			AAEL013594	0	0.436688
																																			AAEL006639	0	0.431728
																																			AAEL009711	0	0.431564
																																			AAEL012982	0	0.431116
																																			AAEL014191	0	0.430741
																																			AAEL004673	0	0.430204
																																			AAEL009619	0	0.430113
																																			AAEL012148	0	0.429621
																																			AAEL001644	0	0.427683
																																			AAEL003543	0	0.42585
																																			AAEL015637	0	0.425767
																																			AAEL004966	0	0.423727
																																			AAEL014610	0	0.423167
																																			AAEL007511	0	0.422864
																																			AAEL001710	0	0.420074
																																			AAEL006355	0	0.417992
																																			AAEL014700	0	0.416636
																																			AAEL013743	0	0.416161
																																			AAEL000578	0	0.415102
																																			AAEL009542	0	0.414841
																																			AAEL002877	0	0.414375
																																			AAEL004519	0	0.414317
																																			AAEL001893	0	0.414159
																																			AAEL015005	0	0.414125
																																			AAEL002714	0	0.412233
																																			AAEL009182	0	0.407947
																																			AAEL000255	0	0.406431
																																			AAEL006052	0	0.406096
																																			AAEL001116	0	0.406045
																																			AAEL006901	0	0.405386
																																			AAEL007321	0	0.40402
																																			AAEL014363	0	0.403772
																																			AAEL000489	0	0.403306
																																			AAEL008722	0	0.402528
																																			AAEL011910	0	0.399087
																																			AAEL007801	0	0.397208
																																			AAEL013582	0	0.396545
																																			AAEL004251	0	0.396466
																																			AAEL017374	0	0.391169
																																			AAEL003342	0	0.387898
																																			AAEL006709	0	0.387078
																																			AAEL011722	0	0.38561
																																			AAEL002120	0	0.384321
																																			AAEL005933	0	0.382672
																																			AAEL009663	0	0.382578
																																			AAEL000224	0	0.381797
																																			AAEL005283	0	0.380154
																																			AAEL008148	0	0.378181
																																			AAEL002058	0	0.377067
																																			AAEL014399	0	0.375424
																																			AAEL009251	0	0.374988
																																			AAEL004091	0	0.374
																																			AAEL006179	0	0.373309
																																			AAEL008082	0	0.369449
																																			AAEL014244	0	0.369449
																																			AAEL000863	0	0.369215
																																			AAEL014032	0	0.368374
																																			AAEL008001	0	0.368016
																																			AAEL006984	0	0.367727
																																			AAEL007146	0	0.365364
																																			AAEL004021	0	0.364752
																																			AAEL015234	0	0.364658
																																			AAEL011858	0	0.363553
																																			AAEL010298	0	0.363541
																																			AAEL010655	0	0.36325
																																			AAEL002398	0	0.362723
																																			AAEL003406	0	0.362595
																																			AAEL011488	0	0.362369
																																			AAEL014882	0	0.36228
																																			AAEL003121	0	0.361452
																																			AAEL003668	0	0.361204
																																			AAEL006638	0	0.360721
																																			AAEL011367	0	0.36019
																																			AAEL011364	0	0.360189
																																			AAEL015305	0	0.359873
																																			AAEL000250	0	0.3592
																																			AAEL010772	0	0.359001
																																			AAEL008571	0	0.35723
																																			AAEL001602	0	0.355758
																																			AAEL010918	0	0.354379
																																			AAEL009087	0	0.350963
																																			AAEL004331	0	0.345529
																																			AAEL009352	0	0.34546
																																			AAEL011818	0	0.344825
																																			AAEL005031	0	0.343854
																																			AAEL008033	0	0.342996
																																			AAEL004495	0	0.342408
																																			AAEL005773	0	0.341971
																																			AAEL002535	0	0.341618
																																			AAEL009787	0	0.341529
																																			AAEL006214	0	0.34027
																																			AAEL003811	0	0.339741
																																			AAEL012163	0	0.338854
																																			AAEL009774	0	0.338673
																																			AAEL010562	0	0.337953
																																			AAEL002330	0	0.33731
																																			AAEL009254	0	0.336636
																																			AAEL015347	0	0.335857
																																			AAEL010401	0	0.333856
																																			AAEL002053	0	0.333784
																																			AAEL013096	0	0.331978
																																			AAEL002093	0	0.331135
																																			AAEL002985	0	0.330626
																																			AAEL002566	0	0.330253
																																			AAEL015002	0	0.328812
																																			AAEL002718	0	0.328161
																																			AAEL007756	0	0.326889
																																			AAEL012177	0	0.323443
																																			AAEL008017	0	0.322374
																																			AAEL011836	0	0.321349
																																			AAEL008988	0	0.321043
																																			AAEL014660	0	0.319481
																																			AAEL004824	0	0.318993
																																			AAEL001976	0	0.318122
																																			AAEL000995	0	0.318
																																			AAEL010119	0	0.316145
																																			AAEL008940	0	0.315815
																																			AAEL006608	0	0.315382
																																			AAEL001435	0	0.314418
																																			AAEL012294	0	0.314148
																																			AAEL004965	0	0.313129
																																			AAEL001941	0	0.311618
																																			AAEL005804	0	0.310559
																																			AAEL004962	0	0.310048
																																			AAEL014880	0	0.308451
																																			AAEL011163	0	0.307961
																																			AAEL000437	0	0.307458
																																			AAEL007106	0	0.306232
																																			AAEL013315	0	0.305363
																																			AAEL013727	0	0.303956
																																			AAEL011457	0	0.303517
																																			AAEL015551	0	0.301627
																																			AAEL003553	0	0.301533
																																			AAEL005393	0	0.301297
																																			AAEL003853	0	0.299696
																																			AAEL001055	0	0.299083
																																			AAEL003007	0	0.297813
																																			AAEL007346	0	0.296441
																																			AAEL013794	0	0.295708
																																			AAEL007121	0	0.295563
																																			AAEL009974	0	0.295376
																																			AAEL004831	0	0.29458
																																			AAEL001720	0	0.294233
																																			AAEL003074	0	0.29272
																																			AAEL011418	0	0.291879
																																			AAEL000139	0	0.291121
																																			AAEL012428	0	0.288179
																																			AAEL007233	0	0.287811
																																			AAEL005858	0	0.286714
																																			AAEL008816	0	0.286388
																																			AAEL017317	0	0.282809
																																			AAEL005807	0	0.282711
																																			AAEL012496	0	0.282128
																																			AAEL003927	0	0.280707
																																			AAEL004626	0	0.279019
																																			AAEL004158,AAEL004194	0	0.278948
																																			AAEL006494	0	0.277884
																																			AAEL007901	0	0.27705
																																			AAEL009139	0	0.274448
																																			AAEL001773	0	0.274114
																																			AAEL004670	0	0.272599
																																			AAEL008326	0	0.269992
																																			AAEL008311	0	0.269526
																																			AAEL008970	0	0.267889
																																			AAEL011030	0	0.26781
																																			AAEL003295	0	0.267615
																																			AAEL011825	0	0.267586
																																			AAEL012376	0	0.267048
																																			AAEL005034	0	0.266996
																																			AAEL011792	0	0.26632
																																			AAEL012334	0	0.26612
																																			AAEL015055	0	0.265622
																																			AAEL017055	0	0.258467
																																			AAEL007709	0	0.258308
																																			AAEL017137	0	0.257117
																																			AAEL004101	0	0.256101
																																			AAEL005720	0	0.254608
																																			AAEL008453	0	0.254329
																																			AAEL007005	0	0.254212
																																			AAEL009175	0	0.25298
																																			AAEL009972	0	0.2513
																																			AAEL003322	0	0.248502
																																			AAEL000236	0	0.247771
																																			AAEL013757	0	0.247348
																																			AAEL009137	0	0.246939
																																			AAEL010374	0	0.246805
																																			AAEL012106	0	0.245823
																																			AAEL005967	0	0.245434
																																			AAEL000494	0	0.244803
																																			AAEL000497	0	0.244803
																																			AAEL000518	0	0.244803
																																			AAEL000525	0	0.244803
																																			AAEL013539	0	0.244226
																																			AAEL005449	0	0.243687
																																			AAEL005806	0	0.243502
																																			AAEL014964	0	0.243264
																																			AAEL014210	0	0.243071
																																			AAEL002893	0	0.243069
																																			AAEL003159	0	0.242291
																																			AAEL001483	0	0.241601
																																			AAEL011620	0	0.241558
																																			AAEL010281	0	0.240736
																																			AAEL002338	0	0.238
																																			AAEL015391	0	0.237032
																																			AAEL004617	0	0.236829
																																			AAEL001718	0	0.235907
																																			AAEL004224	0	0.235443
																																			AAEL006350	0	0.232246
																																			AAEL017336	0	0.23163
																																			AAEL000577	0	0.230904
																																			AAEL013721	0	0.23082
																																			AAEL010149	0	0.23018
																																			AAEL013040	0	0.228017
																																			AAEL007618	0	0.227763
																																			AAEL008822	0	0.223826
																																			AAEL009687	0	0.221432
																																			AAEL014829	0	0.22062
																																			AAEL004556	0	0.220282
																																			AAEL000920	0	0.219002
																																			AAEL015526	0	0.21819
																																			AAEL014291	0	0.217255
																																			AAEL014668	0	0.216381
																																			AAEL007836	0	0.216327
																																			AAEL009401	0	0.215523
																																			AAEL011524	0	0.213959
																																			AAEL001466	0	0.213562
																																			AAEL002112	0	0.213388
																																			AAEL011508	0	0.21286
																																			AAEL011307	0	0.210923
																																			AAEL002044	0	0.210775
																																			AAEL015674	0	0.210553
																																			AAEL015675	0	0.210553
																																			AAEL015676	0	0.210553
																																			AAEL015677	0	0.210553
																																			AAEL007559	0	0.209562
																																			AAEL004019	0	0.208087
																																			AAEL013765	0	0.207829
																																			AAEL005700	0	0.207114
																																			AAEL005398	0	0.206216
																																			AAEL011225	0	0.204596
																																			AAEL011808	0	0.204091
																																			AAEL007027	0	0.202744
																																			AAEL000134	0	0.201062
																																			AAEL001708	0	0.200203
																																			AAEL014425	0	0.198753
																																			AAEL002432	0	0.198172
																																			AAEL009762	0	0.197297
																																			AAEL008831	0	0.196751
																																			AAEL001624	0	0.196605
																																			AAEL006360	0	0.196499
																																			AAEL009928	0	0.196243
																																			AAEL017350	0	0.195309
																																			AAEL013044	0	0.195127
																																			AAEL007260	0	0.193318
																																			AAEL006777	0	0.19328
																																			AAEL000779	0	0.19276
																																			AAEL002242	0	0.192512
																																			AAEL008511	0	0.192158
																																			AAEL003323	0	0.190515
																																			AAEL012112	0	0.190448
																																			AAEL010539	0	0.190144
																																			AAEL013480	0	0.190033
																																			AAEL011152	0	0.189744
																																			AAEL006941	0	0.188293
																																			AAEL012810	0	0.187754
																																			AAEL017431	0	0.187074
																																			AAEL017453	0	0.186876
																																			AAEL001555	0	0.1854
																																			AAEL012787	0	0.183355
																																			AAEL002354	0	0.182462
																																			AAEL008126	0	0.181172
																																			AAEL008066	0	0.180259
																																			AAEL007876	0	0.179991
																																			AAEL005488	0	0.179882
																																			AAEL013822	0	0.179723
																																			AAEL006737	0	0.179179
																																			AAEL009471	0	0.178564
																																			AAEL001714	0	0.177295
																																			AAEL013807	0	0.175621
																																			AAEL005479	0	0.174718
																																			AAEL011589	0	0.173938
																																			AAEL011801	0	0.170539
																																			AAEL009660	0	0.17046
																																			AAEL010194	0	0.16975
																																			AAEL000554	0	0.167788
																																			AAEL013589	0	0.166889
																																			AAEL005445	0	0.166272
																																			AAEL014211	0	0.166153
																																			AAEL000352	0	0.165459
																																			AAEL011717	0	0.165364
																																			AAEL014066	0	0.164928
																																			AAEL005582	0	0.164711
																																			AAEL012775	0	0.163474
																																			AAEL013055	0	0.160946
																																			AAEL015231	0	0.159442
																																			AAEL004491	0	0.158441
																																			AAEL012976	0	0.157834
																																			AAEL002824	0	0.156658
																																			AAEL001753	0	0.155949
																																			AAEL001786	0	0.155949
																																			AAEL010541	0	0.154251
																																			AAEL002378	0	0.154064
																																			AAEL011075	0	0.153895
																																			AAEL004810	0	0.153525
																																			AAEL015381	0	0.151723
																																			AAEL010144	0	0.150288
																																			AAEL002004	0	0.149692
																																			AAEL004789	0	0.149063
																																			AAEL002001	0	0.145934
																																			AAEL009196	0	0.145073
																																			AAEL006768	0	0.144747
																																			AAEL003672	0	0.144444
																																			AAEL014297	0	0.144382
																																			AAEL011788	0	0.144207
																																			AAEL000889	0	0.143973
																																			AAEL013648	0	0.142183
																																			AAEL001987	0	0.141472
																																			AAEL001635	0	0.140679
																																			AAEL001980	0	0.140353
																																			AAEL014041	0	0.139557
																																			AAEL010517	0	0.139533
																																			AAEL014288	0	0.139348
																																			AAEL012998	0	0.136895
																																			AAEL014284	0	0.135694
																																			AAEL014740	0	0.129376
																																			AAEL017229	0	0.1292
																																			AAEL013681	0	0.129012
																																			AAEL008602	0	0.128382
																																			AAEL004544	0	0.12822
																																			AAEL016971	0	0.12634
																																			AAEL015115	0	0.126307
																																			AAEL005388	0	0.125866
																																			AAEL007734	0	0.125247
																																			AAEL006765	0	0.125039
																																			AAEL009482	0	0.122794
																																			AAEL014236	0	0.122488
																																			AAEL003178	0	0.118577
																																			AAEL012087	0	0.118253
																																			AAEL006407	0	0.118199
																																			AAEL008929	0	0.117677
																																			AAEL004622	0	0.117563
																																			AAEL004777	0	0.116817
																																			AAEL004123	0	0.116591
																																			AAEL009411	0	0.116487
																																			AAEL011231	0	0.115845
																																			AAEL012335	0	0.115669
																																			AAEL005784	0	0.115202
																																			AAEL014521	0	0.114175
																																			AAEL010917	0	0.114022
																																			AAEL012862	0	0.113832
																																			AAEL006111	0	0.113648
																																			AAEL011366	0	0.11317
																																			AAEL001015	0	0.111924
																																			AAEL007646	0	0.11151
																																			AAEL010462	0	0.111375
																																			AAEL004414	0	0.111163
																																			AAEL010120	0	0.10993
																																			AAEL012615	0	0.109365
																																			AAEL015019	0	0.108215
																																			AAEL007970	0	0.107085
																																			AAEL006561	0	0.107019
																																			AAEL002994	0	0.106947
																																			AAEL015555	0	0.103532
																																			AAEL013110	0	0.102192
																																			AAEL014488	0	0.101176
																																			AAEL009095	0	0.100948
																																			AAEL009655	0	0.100519
																																			AAEL014981	0	0.0989507
																																			AAEL007623	0	0.0987564
																																			AAEL001034	0	0.0984481
																																			AAEL001877	0	0.0984234
																																			AAEL001139	0	0.0982575
																																			AAEL000324	0	0.0979344
																																			AAEL004897	0	0.0974407
																																			AAEL009258	0	0.0958881
																																			AAEL013626	0	0.0955683
																																			AAEL010578	0	0.0941828
																																			AAEL017255	0	0.0938234
																																			AAEL012895	0	0.0910793
																																			AAEL001195	0	0.0901305
																																			AAEL017331	0	0.0895222
																																			AAEL010162	0	0.0890437
																																			AAEL013804	0	0.0886896
																																			AAEL000490	0	0.0873388
																																			AAEL000501	0	0.0873388
																																			AAEL000513	0	0.0873388
																																			AAEL000517	0	0.0873388
																																			AAEL003814	0	0.0873388
																																			AAEL002007	0	0.0872768
																																			AAEL001578	0	0.0855092
																																			AAEL010117	0	0.0836513
																																			AAEL010830	0	0.0825118
																																			AAEL003833	0	0.0825031
																																			AAEL003863	0	0.0825031
																																			AAEL014793	0	0.0815673
																																			AAEL002684	0	0.081363
																																			AAEL003823	0	0.0811415
																																			AAEL003838	0	0.0811415
																																			AAEL003846	0	0.0811415
																																			AAEL003866	0	0.0811415
																																			AAEL017420	0	0.0803035
																																			AAEL001196	0	0.0797828
																																			AAEL012899	0	0.0782217
																																			AAEL000141	0	0.077955
																																			AAEL012804	0	0.0778502
																																			AAEL015215	0	0.0777151
																																			AAEL017092	0	0.0771019
																																			AAEL006615	0	0.0767707
																																			AAEL004999	0	0.0756897
																																			AAEL000946	0	0.0753556
																																			AAEL008026	0	0.0743691
																																			AAEL003028	0	0.0741194
																																			AAEL001276	0	0.073341
																																			AAEL004939	0	0.0727007
																																			AAEL010197	0	0.0721869
																																			AAEL010622	0	0.0718483
																																			AAEL002743	0	0.0715888
																																			AAEL012693	0	0.0707302
																																			AAEL011631	0	0.0696068
																																			AAEL011449	0	0.0691567
																																			AAEL004073	0	0.0688852
																																			AAEL008654	0	0.0687971
																																			AAEL002981	0	0.0680298
																																			AAEL008467	0	0.0671619
																																			AAEL013053	0	0.0664252
																																			AAEL000700	0	0.0656606
																																			AAEL003827	0	0.0649334
																																			AAEL003828	0	0.0641277
																																			AAEL003836	0	0.0641277
																																			AAEL003850	0	0.0641277
																																			AAEL003852	0	0.0641277
																																			AAEL003856	0	0.0641277
																																			AAEL010997	0	0.0638919
																																			AAEL007094	0	0.0594244
																																			AAEL002632	0	0.0591756
																																			AAEL002671	0	0.057401
																																			AAEL006753	0	0.055851
																																			AAEL007529	0	0.0541883
																																			AAEL009821	0	0.0534484
																																			AAEL011001	0	0.0528409
																																			AAEL011772	0	0.0516437
																																			AAEL001458	0	0.051245
																																			AAEL003132	0	0.0509033
																																			AAEL013947	0	0.0505672
																																			AAEL013008	0	0.0502442
																																			AAEL012770	0	0.0499362
																																			AAEL006120	0	0.0490859
																																			AAEL005989	0	0.0479482
																																			AAEL009924	0	0.0447298
																																			AAEL012761	0	0.0441698
																																			AAEL007120	0	0.0408775
																																			AAEL010744	0	0.0408072
																																			AAEL009777	0	0.0407783
																																			AAEL013106	0	0.0406959
																																			AAEL008031	0	0.0406523
																																			AAEL003307	0	0.0379033
[truncated: 15 more rows]

## Sheet: Sheet2
		Function attributed for the genes with FPKM_B = 0 in salivary glands at 14dpi.
		Ensembl Gene ID	FPKM_B	FPKM_DENVI	Best match to SWISSP database	E-Value		Best match to GO database	E-Value	aaaFunction descriptors	Function parent	Function second parent
		AAEL000188	0	4.50025	Elongation of very long chain fatty acids protein AAEL008004 OS=Aedes aegypti	7e-52	5e-72
		AAEL000218	0	7.21743	Putative defense protein Hdd11 OS=Hyphantria cunea PE=2 SV=1	0.075
		AAEL000322	0	4.066	Uncharacterized membrane protein At1g75140 OS=Arabidopsis thaliana GN=At1g75140	2.4
		AAEL000352	0	0.165459	UPF0082 protein Mfl546 OS=Mesoplasma florum GN=Mfl546 PE=3 SV=1	16
		AAEL000396	0	2.412	Trigger factor OS=Hamiltonella defensa subsp. Acyrthosiphon pisum (strain 5AT)	0.11
		AAEL000400	0	21.4041	Pleckstrin homology domain-containing family A member 6 OS=Homo sapiens	0.012
		AAEL000537	0	11.2068	Nuclear receptor corepressor 2 OS=Mus musculus GN=Ncor2 PE=1 SV=2	16
		AAEL000539	0	2.93977	Ubiquitin carboxyl-terminal hydrolase 36 OS=Drosophila virilis GN=Usp36 PE=3	0.37
		AAEL000555	0	12.2754	Chromodomain-helicase-DNA-binding protein 1 OS=Mus musculus GN=Chd1 PE=1 SV=2	9.1
		AAEL000560	0	1.99873	Putative membrane protein ycf1 OS=Zygnema circumcarinatum GN=ycf1 PE=3 SV=1	6
		AAEL000595	0	0.465319	Down syndrome cell adhesion molecule-like protein 1 OS=Homo sapiens GN=DSCAML1	0.01	1e-69
		AAEL000664	0	2.51426	A-kinase anchor protein 6 OS=Rattus norvegicus GN=Akap6 PE=2 SV=1	20
		AAEL000676	0	3.88425	Protein shifted OS=Drosophila melanogaster GN=shf PE=1 SV=2	1.1
		AAEL000731	0	7.30324	Zinc finger protein 28 OS=Mus musculus GN=Zfp28 PE=2 SV=3	5.4
		AAEL000779	0	0.19276	Mitochondrial translation factor ATP22 OS=Candida glabrata GN=ATP22 PE=3 SV=1	0.61
		AAEL000817	0	0.60801	Rhomboid family member 1 OS=Danio rerio GN=rhbdf1 PE=2 SV=1	1e-117	0
		AAEL000920	0	0.219002	Auxin-responsive protein IAA12 OS=Oryza sativa subsp. japonica GN=IAA12 PE=2	0.19
		AAEL000975	0	5.77357	E3 ubiquitin-protein ligase RNF8 OS=Danio rerio GN=rnf8 PE=2 SV=1	0.36
		AAEL000995	0	0.318	Serine/threonine-protein kinase atg1 OS=Emericella nidulans GN=atg1 PE=3 SV=1	12
		AAEL001026	0	0.64475	Protein giant-lens OS=Drosophila melanogaster GN=argos PE=1 SV=1	2.4
		AAEL001043	0	3.39884	Outer membrane protein icsA autotransporter OS=Shigella flexneri GN=icsA PE=1	0.015	0.044
		AAEL001136	0	7.29261	Nucleolar complex-associated protein 3 OS=Schizosaccharomyces pombe GN=noc3 PE=1	5.3
		AAEL001192	0	2.27551	Nucleic-acid-binding protein from mobile element jockey OS=Drosophila funebris	0.021
		AAEL001259	0	7.38622	Nucleoprotein OS=Bovine ephemeral fever virus GN=N PE=3 SV=1	6e-07
		AAEL001274	0	1.49913	30S ribosomal protein S7 OS=Rhodoferax ferrireducens (strain DSM 15236 / ATCC	4.1
		AAEL001362	0	14.8063	Plexin-2 OS=Caenorhabditis elegans GN=plx-2 PE=1 SV=4	3.2
		AAEL001403	0	15.223	Lysozyme C OS=Psetta maxima GN=lys PE=2 SV=1	0.69	2e-44
		AAEL001592	0	1.94473	Uncharacterized protein L885 OS=Acanthamoeba polyphaga mimivirus GN=MIMI_L885	1.9
		AAEL001602	0	0.355758	Protein G12 OS=Anopheles gambiae GN=AGAP006187 PE=2 SV=2	1e-16
		AAEL001628	0	1.42441	Protein P OS=Hepatitis B virus genotype C subtype ayw (isolate	1.4
		AAEL001686	0	6.12945	1-deoxy-D-xylulose-5-phosphate synthase OS=Clavibacter michiganensis subsp.	0.22
		AAEL001700	0	8.71573	Serine-rich 25 kDa antigen protein OS=Entamoeba histolytica PE=1 SV=1	0.044	0.024
		AAEL001708	0	0.200203	GTPase obg OS=Chlorobaculum parvum (strain NCIB 8327) GN=obg PE=3 SV=1	0.21
		AAEL001720	0	0.294233	Methionyl-tRNA synthetase OS=Wigglesworthia glossinidia brevipalpis GN=metG PE=3	9.2
		AAEL001730	0	1.54058	Uncharacterized protein C16orf89 homolog OS=Mus musculus PE=2 SV=2	9e-10	4e-10
		AAEL001753	0	0.155949	DNA replication ATP-dependent helicase dna2 OS=Schizosaccharomyces pombe GN=dna2	0.37
		AAEL001783	0	2.53495	Protein slowmo OS=Drosophila melanogaster GN=slmo PE=1 SV=1	1e-29	6e-30
		AAEL001786	0	0.155949	DNA replication ATP-dependent helicase dna2 OS=Schizosaccharomyces pombe GN=dna2	0.37
		AAEL001908	0	6.69052	Multiple epidermal growth factor-like domains 10 OS=Mus musculus GN=Megf10 PE=1	1.4
		AAEL001949	0	30.1085	Na(+)/H(+) antiporter nhaA OS=Pseudomonas fluorescens (strain Pf0-1) GN=nhaA	0.004
		AAEL001961	0	5.00211	NADP-specific glutamate dehydrogenase OS=Penicillium chrysogenum GN=GDH PE=3	7.8
		AAEL002364	0	1.30061	Insulin-like growth factor II OS=Gallus gallus GN=IGF2 PE=1 SV=2	1.1
		AAEL002447	0	1.21088	Holliday junction ATP-dependent DNA helicase ruvB OS=Rickettsia felis GN=ruvB	0.54
		AAEL002470	0	8.64378	Lysyl-tRNA synthetase OS=Wigglesworthia glossinidia brevipalpis GN=lysS PE=3	5.3
		AAEL002473	0	8.43524	Phosphatidylinositol-3,4,5-trisphosphate 5-phosphatase 2B OS=Danio rerio	0.27
		AAEL002549	0	8.06965	Fibrillin-3 OS=Homo sapiens GN=FBN3 PE=2 SV=2	0.095
		AAEL002726	0	0.816091	37 kDa salivary gland allergen Aed a 2 OS=Aedes aegypti GN=D7 PE=1 SV=2	2e-27
		AAEL002773	0	0.850711	Alanyl-tRNA synthetase OS=Clostridium perfringens GN=alaS PE=3 SV=1	5.3
		AAEL002858	0	1.16396	Solute carrier family 35 member F3 OS=Homo sapiens GN=SLC35F3 PE=2 SV=2	7e-53	0
		AAEL002859	0	0.724378	Solute carrier family 22 member 1 OS=Sus scrofa GN=SLC22A1 PE=2 SV=1	1.5
		AAEL002899	0	3.24241	Lipid transfer-like protein VAS OS=Arabidopsis thaliana GN=VAS PE=2 SV=1	0.38
		AAEL002908	0	6.55599	Iroquois-class homeodomain protein IRX-3 OS=Mus musculus GN=Irx3 PE=1 SV=2	0.71
		AAEL002920	0	0.587531	Cyclic di-GMP-binding protein OS=Acetobacter xylinus GN=bcsB PE=1 SV=1	0.074
		AAEL002926	0	1.23344	Quinolinate synthetase A OS=Synechocystis sp. (strain PCC 6803) GN=nadA PE=3	1.1
		AAEL003200	0	3.99848	Ribosomal large subunit pseudouridine synthase D OS=Borrelia burgdorferi GN=rluD	6.9
		AAEL003207	0	1.13162	Serrate RNA effector molecule homolog OS=Aedes aegypti GN=Ars2 PE=3 SV=1	0.2
		AAEL003260	0	0.853007	Prion-like-(Q/N-rich) domain-bearing protein 8 OS=Caenorhabditis elegans	2.7
		AAEL003300	0	5.39283	Gastrula zinc finger protein XlCGF66.1 (Fragment) OS=Xenopus laevis PE=2 SV=1	5.3
		AAEL003319	0	0.750431	Cytadherence high molecular weight protein 3 OS=Mycoplasma gallisepticum GN=hlp3	0.034	0.002
		AAEL003323	0	0.190515	Zinc finger CCCH domain-containing protein 3 OS=Homo sapiens GN=ZC3H3 PE=1 SV=2	4.6
		AAEL003502	0	7.06886	Probable G-protein coupled receptor 151 OS=Rattus norvegicus GN=Gpr151 PE=2 SV=1	2.4
		AAEL003516	0	1.3529	SET and MYND domain-containing protein 4 OS=Pongo abelii GN=SMYD4 PE=2 SV=1	4e-34	0
		AAEL003663	0	0.70699	DNA polymerase OS=Choristoneura fumiferana nuclear polyhedrosis virus GN=POL	12
		AAEL003691	0	0.583835	Putative ankyrin repeat protein R734 OS=Acanthamoeba polyphaga mimivirus	1.9
		AAEL003784	0	1.35433	Alanyl-tRNA synthetase OS=Mycoplasma hyopneumoniae (strain J / ATCC 25934 / NCTC	1.5	0
		AAEL003803	0	4.93417	F-box protein YDR131C OS=Saccharomyces cerevisiae GN=YDR131C PE=1 SV=1	3.9
		AAEL003821	0	0.684319	Defensin D2 (Fragment) OS=Spinacia oleracea PE=1 SV=1	0.057
		AAEL003927	0	0.280707	Follicle cell protein 3C-1 OS=Drosophila melanogaster GN=Fcp3C PE=1 SV=3	1e-27
		AAEL003962	0	4.48146	Transmembrane protein 194B OS=Rattus norvegicus GN=Tmem194b PE=4 SV=1	1.5
		AAEL003981	0	2.22136	Glucosamine--fructose-6-phosphate aminotransferase	20
		AAEL004101	0	0.256101	KH domain-containing protein C23D3.08 OS=Schizosaccharomyces pombe	1.8
		AAEL004104	0	2.99936	Probable disease resistance protein At1g61300 OS=Arabidopsis thaliana	0.64
		AAEL004111	0	2.95973	RAF proto-oncogene serine/threonine-protein kinase OS=Xenopus laevis GN=raf1	7
		AAEL004115	0	5.18636	Glucosamine--fructose-6-phosphate aminotransferase	20
		AAEL004271	0	2.73448	Solute carrier family 25 member 38 OS=Xenopus tropicalis GN=slc25a38 PE=2 SV=1	2.2
		AAEL004304	0	14.8031	Threonine efflux protein OS=Salmonella typhimurium GN=rhtC PE=3 SV=1	34
		AAEL004315	0	2.65524	Protein split ends OS=Drosophila melanogaster GN=spen PE=1 SV=2	1.9
		AAEL004318	0	1.26109	Uncharacterized protein C12orf55 homolog OS=Mus musculus PE=2 SV=2	0.58
		AAEL004413	0	8.67442	Putative uncharacterized protein DDB_G0280341 OS=Dictyostelium discoideum	0.44
		AAEL004429	0	0.610654	UvrABC system protein C OS=Desulfatibacillum alkenivorans (strain AK-01) GN=uvrC	1.2
		AAEL004483	0	4.78242	Putative membrane protein ycf1 OS=Staurastrum punctulatum GN=ycf1 PE=3 SV=1	45
		AAEL004508	0	2.04836	Hybrid signal transduction histidine kinase H OS=Dictyostelium discoideum	0.41
		AAEL004537	0	1.03719	Tyrosine-protein kinase Lyn OS=Rattus norvegicus GN=Lyn PE=2 SV=3	0.48
		AAEL004601	0	0.69094	Thiopurine S-methyltransferase OS=Vibrio fischeri (strain ATCC 700601 / ES114)	9.1
		AAEL004610	0	1.90589	Alpha,alpha-trehalose-phosphate synthase	1.9
		AAEL004614	0	0.787083	Dynactin subunit 1 OS=Gallus gallus GN=DCTN1 PE=2 SV=2	2.8
		AAEL004626	0	0.279019	DNA ligase OS=Thermosipho africanus (strain TCF52B) GN=ligA PE=3 SV=1	0.097
		AAEL004627	0	2.60095	NAD(P)H-quinone oxidoreductase subunit 5, chloroplastic OS=Panax ginseng GN=ndhF	0.25
		AAEL004644	0	0.710593	Peptide chain release factor 1 OS=Clostridium beijerinckii (strain ATCC 51743 /	0.24
		AAEL004672	0	0.711168	Growth-differentiation transition protein 5 OS=Dictyostelium discoideum GN=gdt5	1.8
		AAEL004695	0	2.81709	Beta-agarase AgaB34 OS=Agarivorans albus GN=agaB34 PE=3 SV=1	1.8
		AAEL004718	0	2.50551	Exonuclease OS=Enterobacteria phage lambda GN=exo PE=1 SV=1	0.003	2e-17
		AAEL004789	0	0.149063	UPF0082 protein Mfl546 OS=Mesoplasma florum GN=Mfl546 PE=3 SV=1	16
		AAEL004800	0	3.08016	Vacuolar-sorting receptor 1 OS=Pisum sativum GN=BP80 PE=1 SV=1	59
		AAEL004909	0	2.2756	tRNA pseudouridine synthase A OS=Bacillus amyloliquefaciens (strain FZB42)	1.4
		AAEL004965	0	0.313129	Protein FAM161A OS=Xenopus tropicalis GN=fam161a PE=2 SV=1	0.55
		AAEL005007	0	11.1174	Potassium voltage-gated channel subfamily A member 10 OS=Homo sapiens GN=KCNA10	2.4
		AAEL005015	0	2.44216	RNA pseudouridylate synthase domain-containing protein 2 OS=Homo sapiens	0.21
		AAEL005111	0	1.99201	Dihydroorotase OS=Anaeromyxobacter sp. (strain K) GN=pyrC PE=3 SV=1	0.12
		AAEL005275	0	0.856818	Suppressor of lethality of KEX2 GAS1 double null mutant protein 1	45
		AAEL005283	0	0.380154	Alanyl-tRNA synthetase OS=Mycoplasma hyopneumoniae (strain J / ATCC 25934 / NCTC	1.5	0
		AAEL005328	0	4.27185	Brain-enriched guanylate kinase-associated protein OS=Ovis aries GN=BEGAIN PE=2	12
		AAEL005360	0	1.45729	Mastermind-like protein 2 OS=Homo sapiens GN=MAML2 PE=1 SV=1	1.1
		AAEL005393	0	0.301297	Protein P OS=Hepatitis B virus genotype A1 subtype adw2 (isolate South	0.88
		AAEL005398	0	0.206216	Involucrin OS=Tupaia glis GN=IVL PE=2 SV=1	1.7
		AAEL005443	0	1.62185	NF-kappa-B inhibitor beta OS=Homo sapiens GN=NFKBIB PE=1 SV=2	0.15	0
		AAEL005488	0	0.179882	Interleukin-17A OS=Sus scrofa GN=IL17A PE=2 SV=1	1.1
		AAEL005572	0	0.968796	UvrABC system protein B OS=Rickettsia rickettsii (strain Sheila Smith) GN=uvrB	3.7
		AAEL005624	0	1.74132	Probable WRKY transcription factor 68 OS=Arabidopsis thaliana GN=WRKY68 PE=2	1.3
		AAEL005697	0	1.00058	Fibronectin-binding protein plpA OS=Mycoplasma gallisepticum GN=plpA PE=1 SV=1	0.006
		AAEL005757	0	3.80002	Cell wall synthesis protein psu1 OS=Schizosaccharomyces pombe GN=psu1 PE=2 SV=1	0.23
		AAEL005789	0	9.68447	Adenine deaminase OS=Deinococcus geothermalis (strain DSM 11300) GN=ade PE=3	1.1
		AAEL005807	0	0.282711	T-box transcription factor TBX5 OS=Gallus gallus GN=TBX5 PE=2 SV=1	2.5
		AAEL005913	0	3.71953	Uncharacterized membrane protein HI0867 OS=Haemophilus influenzae GN=HI0867 PE=3	0.37
		AAEL006046	0	7.55904	Angiotensin-converting enzyme OS=Rattus norvegicus GN=Ace PE=2 SV=1	4.1
		AAEL006106	0	0.955426	Pheromone-binding protein 2 OS=Antheraea pernyi PE=2 SV=1	0.094
		AAEL006109	0	1.57712	Pheromone-binding protein 2 OS=Antheraea pernyi PE=2 SV=1	0.052
		AAEL006111	0	0.113648	Protein FAM113B OS=Homo sapiens GN=FAM113B PE=2 SV=1	4
		AAEL006164	0	1.24222	1-deoxy-D-xylulose-5-phosphate synthase OS=Burkholderia ambifaria (strain ATCC	4.1	7e-07
		AAEL006175	0	5.47862	UPF0545 protein C22orf39 homolog OS=Danio rerio PE=3 SV=2	3e-13
		AAEL006198	0	1.36456	Probable G-protein coupled receptor 176 OS=Rattus norvegicus GN=Gpr176 PE=2 SV=2	7
		AAEL006204	0	1.23559	D-tyrosyl-tRNA(Tyr) deacylase OS=Desulfovibrio desulfuricans (strain ATCC 27774	12
		AAEL006215	0	5.01022	Syntaxin UFE1 OS=Saccharomyces cerevisiae GN=UFE1 PE=1 SV=2	0.83
		AAEL006243	0	11.8718	Pleckstrin homology domain-containing family M member 2 OS=Mus musculus	7
		AAEL006297	0	0.644431	Venom allergen 5.02 (Fragment) OS=Dolichovespula maculata PE=1 SV=3	3e-22	5e-39
		AAEL006524	0	4.46731	Venom allergen 3 OS=Solenopsis invicta PE=1 SV=2	2e-23	1e-39
		AAEL006528	0	2.39277	SAGA-associated factor 73 OS=Saccharomyces cerevisiae GN=SGF73 PE=1 SV=1	27
		AAEL006616	0	3.72558	30S ribosomal protein S3 OS=Rhodopirellula baltica GN=rpsC PE=3 SV=1	0.63
		AAEL006683	0	1.48212	Probable polyketide synthase 18 OS=Dictyostelium discoideum GN=pks18 PE=2 SV=1	0.005	0.003
		AAEL006695	0	1.22483	Actin cytoskeleton-regulatory complex protein SLA1 OS=Yarrowia lipolytica	0.24
		AAEL006709	0	0.387078	G-protein coupled receptor homolog US28 OS=Human cytomegalovirus (strain Towne)	12
		AAEL006759	0	1.08939	DNA replication and repair protein recF OS=Rhodococcus erythropolis (strain PR4	1.3
		AAEL006767	0	1.95565	RING finger protein ENSP00000382794 homolog OS=Pongo abelii PE=2 SV=1	5.4
		AAEL006768	0	0.144747	Outer dense fiber protein 2 OS=Mus musculus GN=Odf2 PE=1 SV=1	1.8
		AAEL006812	0	21.1366	Type-2 restriction enzyme MboI OS=Moraxella bovis GN=mboIR PE=1 SV=1	5.4
		AAEL006892	0	1.64106	Dimethyladenosine transferase OS=Lactobacillus brevis (strain ATCC 367 / JCM	0.39
		AAEL006894	0	7.35325	Putative ankyrin repeat protein FPV244 OS=Fowlpox virus GN=FPV244 PE=4 SV=1	12
		AAEL006969	0	3.36148	Protein YN1551_0772 OS=Sulfolobus islandicus (strain Y.N.15.51 / Yellowstone #2)	2.1
		AAEL006997	0	4.91083	Chorismate synthase OS=Hahella chejuensis (strain KCTC 2396) GN=aroC PE=3 SV=1	0.54
		AAEL007073	0	3.06709	ER degradation-enhancing alpha-mannosidase-like 3 OS=Homo sapiens GN=EDEM3 PE=1	0.062
		AAEL007212	0	0.748616	Neuropeptide-like 3 OS=Drosophila melanogaster GN=Nplp3 PE=1 SV=1	1.4	0.091
		AAEL007232	0	1.83708	Translation initiation factor IF-2 OS=Corynebacterium diphtheriae GN=infB PE=3	0.069
		AAEL007255	0	3.32019	DNA-directed RNA polymerase II subunit RPB1 OS=Saccharomyces cerevisiae GN=RPB1	1.1
		AAEL007262	0	0.509903	Transcriptional activator/repressor GIS1 OS=Saccharomyces cerevisiae GN=GIS1	0.83
		AAEL007321	0	0.40402	LysM and putative peptidoglycan-binding domain-containing protein 3 OS=Homo	6e-10	2e-39
		AAEL007368	0	4.4524	Zinc finger protein 287 OS=Mus musculus GN=Znf287 PE=2 SV=1	0.27
		AAEL007399	0	3.11968	Fasciclin-3 OS=Drosophila melanogaster GN=Fas3 PE=2 SV=1	4e-05	2e-05
		AAEL007540	0	1.39268	ATP-dependent Clp protease proteolytic subunit OS=Oceanobacillus iheyensis	3.5
		AAEL007543	0	5.39287	Meiotically up-regulated gene 154 protein OS=Schizosaccharomyces pombe GN=mug154	1.1
		AAEL007606	0	1.59306	DNA-directed RNA polymerase subunit beta' OS=Thalassiosira pseudonana GN=rpoC1	6.9
		AAEL007734	0	0.125247	Cyclic di-GMP-binding protein OS=Acetobacter xylinus GN=bcsBI PE=3 SV=1	5.4
		AAEL007737	0	0.531176	M-phase inducer phosphatase 2 OS=Homo sapiens GN=CDC25B PE=1 SV=2	5.3
		AAEL007836	0	0.216327	D-alanine--D-alanine ligase OS=Prochlorococcus marinus (strain NATL1A) GN=ddl	34
		AAEL007855	0	1.95553	E3 ubiquitin-protein ligase Smurf1 OS=Drosophila melanogaster GN=lack PE=1 SV=3	1.1
		AAEL007886	0	14.2622	Lymphocyte activation gene 3 protein OS=Mus musculus GN=Lag3 PE=2 SV=1	2.4
		AAEL007894	0	1.49723	Period circadian protein (Fragment) OS=Rhagoletis completa GN=per PE=3 SV=1	1.8
		AAEL007901	0	0.27705	Translation initiation factor IF-2 OS=Wigglesworthia glossinidia brevipalpis	0.022
		AAEL007956	0	0.714526	Uncharacterized protein RT0683 OS=Rickettsia typhi GN=RT0683 PE=3 SV=1	0.13
		AAEL007960	0	2.77561	UDP-3-O-	0.012
		AAEL007963	0	0.88237	S-adenosylmethionine synthetase OS=Populus deltoides GN=METK PE=2 SV=1	4.1
		AAEL008033	0	0.342996	Sodium-dependent acetylcholine transporter OS=Caenorhabditis elegans GN=snf-6	15
		AAEL008038	0	1.41387	Uncharacterized protein F58A4.6 OS=Caenorhabditis elegans GN=F58A4.6 PE=2 SV=2	9e-14	5e-14
		AAEL008051	0	16.025	HTH-type transcriptional regulator gbpR OS=Rhizobium radiobacter GN=gbpR PE=4	11
		AAEL008082	0	0.369449	Genome polyprotein OS=Human rhinovirus 89 PE=3 SV=3	15
		AAEL008253	0	14.903	X-linked retinitis pigmentosa GTPase regulator-interacting protein 1 OS=Bos	0.36
		AAEL008286	0	1.12784	Uncharacterized transporter MJ0576 OS=Methanocaldococcus jannaschii GN=MJ0576	2.3
		AAEL008433	0	1.32807	Treacle protein OS=Homo sapiens GN=TCOF1 PE=1 SV=2	2.4
		AAEL008453	0	0.254329	KH domain-containing protein C23D3.08 OS=Schizosaccharomyces pombe	0.59
		AAEL008460	0	0.809356	Succinyl-CoA ligase	0.28
		AAEL008503	0	19.4719	Eukaryotic initiation factor iso-4F subunit p82-34 OS=Triticum aestivum PE=1	0.47
		AAEL008586	0	8.82308	UPF0061 protein SO_0330 OS=Shewanella oneidensis GN=SO_0330 PE=3 SV=1	12
		AAEL008829	0	3.84314	Glutamyl-tRNA synthetase 1 OS=Parvibaculum lavamentivorans (strain DS-1 / DSM	0.77	1e-73
		AAEL008909	0	4.87389	B-cell receptor CD22 OS=Mus musculus GN=Cd22 PE=1 SV=1	0.026	2e-48
		AAEL008926	0	14.831	Transcription factor BCFI OS=Bombyx mori GN=GATA-B PE=2 SV=1	1.9
		AAEL009058	0	0.790564	Uncharacterized protein C19orf39 homolog OS=Mus musculus PE=2 SV=2	0.004
		AAEL009095	0	0.100948	Protein US2 homolog OS=Bovine herpesvirus 1.2 (strain ST) PE=3 SV=1	4.1
		AAEL009103	0	1.4113	Glycine dehydrogenase	0.36
		AAEL009256	0	1.39045	Putative methyltransferase METT10D OS=Xenopus laevis GN=mett10d PE=2 SV=1	2.4
		AAEL009277	0	4.62227	Sodium channel protein type 11 subunit alpha OS=Rattus norvegicus GN=Scn11a PE=1	1.8
		AAEL009315	0	2.87723	Transcription initiation factor IIB OS=Kluyveromyces lactis GN=SUA7 PE=3 SV=1	12
		AAEL009361	0	6.57431	50S ribosomal protein L24 OS=Dictyoglomus turgidum (strain Z-1310 / DSM 6724)	0.074
		AAEL009409	0	3.42847	Protein TIF31 homolog OS=Pichia guilliermondii GN=TIF31 PE=3 SV=2	0.41
		AAEL009541	0	2.8702	Allatotropin OS=Manduca sexta PE=1 SV=2	1e-09
		AAEL009578	0	0.889408	Protein BFR2 OS=Candida albicans GN=BFR2 PE=3 SV=2	0.31	0.0007
		AAEL009586	0	14.9332	Mitochondrial distribution and morphology protein 12 OS=Botryotinia fuckeliana	1.9
		AAEL009669	0	0.792283	Protein essC OS=Staphylococcus aureus (strain MW2) GN=essC PE=1 SV=1	1.2
		AAEL009687	0	0.221432	NADH-quinone oxidoreductase subunit H OS=Flavobacterium psychrophilum (strain	12
		AAEL009711	0	0.431564	Uncharacterized protein C6orf89 homolog OS=Danio rerio GN=zgc:162255 PE=2 SV=1	0.15
		AAEL009923	0	1.72723	Proton-coupled amino acid transporter 3 OS=Rattus norvegicus GN=Slc36a3 PE=2	2e-07	0
		AAEL009962	0	1.81878	Chromosome partition protein smc homolog OS=Methanocaldococcus jannaschii	0.16
		AAEL009972	0	0.2513	Short transient receptor potential channel 4 OS=Rattus norvegicus GN=Trpc4 PE=2	12
		AAEL009979	0	13.362	Microtubule-associated protein 1A OS=Mus musculus GN=Map1a PE=1 SV=2	5.4
		AAEL010034	0	8.32441	Arrestin domain-containing protein A OS=Dictyostelium discoideum GN=adcA PE=1	1.1
		AAEL010104	0	0.930021	Bacteriophage SPP1 adsorption protein yueB OS=Bacillus subtilis GN=yueB PE=4	0.089
		AAEL010115	0	1.59456	Methionyl-tRNA synthetase OS=Porphyromonas gingivalis (strain ATCC 33277 / DSM	0.48
		AAEL010156	0	8.8999	Transient receptor potential cation channel CG34123 OS=Drosophila melanogaster	5.4
		AAEL010160	0	9.51828	PR domain zinc finger protein 14 OS=Homo sapiens GN=PRDM14 PE=2 SV=1	2.8
		AAEL010186	0	16.0438	Protein MPA43 OS=Saccharomyces cerevisiae GN=MPA43 PE=1 SV=1	3.4
		AAEL010194	0	0.16975	Probable cobyrinic acid A,C-diamide synthase OS=Archaeoglobus fulgidus GN=cobB	1
		AAEL010229	0	5.46212	ER lumen protein retaining receptor OS=Entamoeba histolytica GN=ERD2 PE=3 SV=1	1
		AAEL010269	0	1.29924	Venom allergen 5.02 (Fragment) OS=Dolichovespula maculata PE=1 SV=3	3e-22	4e-39
		AAEL010282	0	11.9977	50S ribosomal protein L35 OS=Acidothermus cellulolyticus (strain ATCC 43068 /	12
		AAEL010309	0	26.2128	Trypsin zeta OS=Drosophila melanogaster GN=zetaTry PE=1 SV=2	5.3
		AAEL010358	0	0.877681	Uncharacterized transcriptional regulatory protein C2H10.01	6.9
		AAEL010398	0	1.70969	Cell wall protein SED1 OS=Saccharomyces cerevisiae GN=SED1 PE=1 SV=1	0.48
		AAEL010412	0	3.1531	M protein, serotype 24 OS=Streptococcus pyogenes GN=emm24 PE=3 SV=1	3.1
		AAEL010445	0	1.2387	Protein unc-80 homolog OS=Drosophila melanogaster GN=CG18437 PE=2 SV=4	12
		AAEL010489	0	1.08188	Putative uncharacterized protein LOC387726 OS=Homo sapiens PE=5 SV=2	1
		AAEL010490	0	4.15067	L-rhamnose isomerase OS=Bacillus subtilis GN=rhaA PE=3 SV=1	4
		AAEL010507	0	3.36269	Zinc finger protein 215 OS=Homo sapiens GN=ZNF215 PE=2 SV=1	0.28
		AAEL010544	0	1.69107	UPF0463 transmembrane protein C6orf35 homolog OS=Danio rerio GN=si:dkey-60a16.5	4e-25	2e-25
		AAEL010622	0	0.0718483	MAGE-like protein 2 OS=Homo sapiens GN=MAGEL2 PE=2 SV=1	0.81
		AAEL010720	0	3.93117	Protein-glutamine gamma-glutamyltransferase K OS=Canis familiaris GN=TGM1 PE=2	12
		AAEL010869	0	16.9964	Microtubule-associated protein 1A OS=Mus musculus GN=Map1a PE=1 SV=2	5.4
		AAEL010918	0	0.354379	Protein G12 OS=Anopheles gambiae GN=AGAP006187 PE=2 SV=2	1e-16
		AAEL011066	0	0.485396	Phosducin OS=Mus musculus GN=Pdc PE=2 SV=1	15
		AAEL011075	0	0.153895	Putative uncharacterized protein ENSG00000214546 OS=Homo sapiens PE=4 SV=1	34
		AAEL011119	0	6.01842	3-dehydroquinate synthase OS=Exiguobacterium sp. (strain ATCC BAA-1283 / AT1b)	20
		AAEL011210	0	1.26109	Putative membrane protein ycf1 OS=Ipomoea purpurea GN=ycf1-A PE=3 SV=1	0.8	9e-75
		AAEL011365	0	1.56657	High-affinity zinc uptake system protein znuA OS=Yersinia pestis GN=znuA PE=3	0.28
		AAEL011398	0	0.715175	Structural maintenance of chromosomes protein 1A OS=Xenopus laevis GN=smc1a PE=1	0.12
		AAEL011561	0	1.20116	F-box/WD repeat-containing protein 4 OS=Homo sapiens GN=FBXW4 PE=2 SV=1	2e-18	1e-19
		AAEL011702	0	0.725908	Germin-like protein 12-2 OS=Oryza sativa subsp. japonica GN=Os12g0154800 PE=2	0.79
		AAEL011735	0	1.43548	Heat shock factor 2-binding protein OS=Homo sapiens GN=HSF2BP PE=1 SV=1	1e-07	3e-08
		AAEL011798	0	1.78179	Venom allergen 5 OS=Vespula pensylvanica PE=1 SV=1	4e-22	8e-37
		AAEL011839	0	1.41408	DNA polymerase epsilon catalytic subunit A OS=Schizosaccharomyces pombe GN=pol2	1.2
		AAEL011845	0	1.14164	Nicotinate-nucleotide--dimethylbenzimidazole phosphoribosyltransferase	27
		AAEL011976	0	1.99551	Meiosis-inducing protein 1 OS=Saccharomyces cerevisiae GN=IME1 PE=1 SV=1	2.4
		AAEL012018	0	6.24958	Boron transporter-like protein 2 OS=Arabidopsis thaliana GN=At1g15460 PE=2 SV=1	0.33
		AAEL012022	0	3.66769	Centrosome and spindle pole-associated protein 1 OS=Homo sapiens GN=CSPP1 PE=1	0.005
		AAEL012148	0	0.429621	Rab-3-interacting molecule unc-10 OS=Caenorhabditis elegans GN=unc-10 PE=1 SV=2	0.33
		AAEL012163	0	0.338854	Protein MEN-8 OS=Silene latifolia GN=MEN-8 PE=3 SV=1	27
		AAEL012173	0	18.2625	Pentatricopeptide repeat-containing protein At1g09410 OS=Arabidopsis thaliana	5.3
		AAEL012188	0	1.93264	Aspartyl/glutamyl-tRNA(Asn/Gln) amidotransferase subunit B OS=Pseudomonas	7.2
		AAEL012328	0	0.74179	LYR motif-containing protein 2 OS=Salmo salar GN=lyrm2 PE=3 SV=1	3e-20	4e-19
		AAEL012372	0	4.78183	Tetratricopeptide repeat protein 37 OS=Homo sapiens GN=TTC37 PE=1 SV=1	0.15
		AAEL012414	0	0.733743	WD repeat-containing protein NFIA_058290 OS=Neosartorya fischeri (strain ATCC	1
		AAEL012540	0	11.186	Nitrogenase molybdenum-iron protein beta chain OS=Cyanothece sp. (strain PCC	35
		AAEL012542	0	4.93831	Short neuropeptide F OS=Aedes aegypti GN=sNPF PE=2 SV=2	1e-112	8e-20
		AAEL012570	0	21.9403	Protein BANP OS=Danio rerio GN=banp PE=2 SV=1	3.2
		AAEL012682	0	2.59207	Fox-1 homolog A OS=Pongo abelii GN=FOX1 PE=2 SV=1	1.1
		AAEL012839	0	3.1607	Chromosome segregation and cytokinesis defective protein 1 OS=Caenorhabditis	0.034	0.017
		AAEL012844	0	1.20366	A-agglutinin anchorage subunit OS=Saccharomyces cerevisiae GN=AGA1 PE=1 SV=1	5e-07	2e-14
		AAEL012872	0	1.09823	Alanine racemase 2 OS=Clostridium acetobutylicum GN=alr2 PE=3 SV=1	5.2
		AAEL012959	0	1.30038	Centrosomal protein of 55 kDa OS=Rattus norvegicus GN=Cep55 PE=2 SV=1	0.001	0.0005
		AAEL012976	0	0.157834	Ribosomal RNA large subunit methyltransferase N OS=Zymomonas mobilis GN=rlmN	16
		AAEL013001	0	1.8621	Ribonuclease 3 OS=Azotobacter vinelandii (strain DJ / ATCC BAA-1303) GN=rnc PE=3	13
		AAEL013013	0	8.15631	Thioredoxin-related transmembrane protein 2 homolog OS=Drosophila melanogaster	1.1
		AAEL013118	0	0.447557	Protein G12 OS=Anopheles gambiae GN=AGAP006187 PE=2 SV=2	4e-44
		AAEL013156	0	0.895764	DNA mismatch repair protein mutL OS=Staphylococcus carnosus (strain TM300)	8.8
		AAEL013185	0	1.24932	Uncharacterized serine-rich protein C1E8.05 OS=Schizosaccharomyces pombe	0.003	7e-34
		AAEL013224	0	0.934425	Toll-like receptor 2 OS=Canis familiaris GN=TLR2 PE=2 SV=1	0.64
		AAEL013306	0	2.40261	Tetratricopeptide repeat protein 21B OS=Homo sapiens GN=TTC21B PE=2 SV=1	4.1
		AAEL013311	0	5.95947	Metallophosphoesterase 1 homolog OS=Caenorhabditis elegans GN=B0511.13 PE=2 SV=2	5.4
		AAEL013317	0	0.937725	Cyclin-L1 OS=Xenopus laevis GN=ccnl1 PE=2 SV=2	0.59
		AAEL013332	0	1.62527	Ankycorbin OS=Homo sapiens GN=RAI14 PE=1 SV=2	0.074
		AAEL013440	0	5.63737	TM2 domain-containing protein almondex OS=Drosophila melanogaster GN=amx PE=2	2e-67	1e-67
		AAEL013447	0	23.4414	Calcitonin receptor OS=Homo sapiens GN=CALCR PE=1 SV=1	5.4
		AAEL013480	0	0.190033	Probable cell wall amidase lytH OS=Staphylococcus saprophyticus subsp.	5.3
		AAEL013524	0	25.1918	Condensin complex subunit 3 OS=Saccharomyces cerevisiae GN=YCG1 PE=1 SV=2	7
		AAEL013545	0	1.00118	Putative histone-lysine N-methyltransferase PFF1440w OS=Plasmodium falciparum	26
		AAEL013702	0	4.1365	Putative F-box protein At4g22660 OS=Arabidopsis thaliana GN=At4g22660 PE=2 SV=1	45
		AAEL013734	0	7.22289	Protein translocase subunit secA OS=Vibrio cholerae serotype O1 (strain M66-2)	0.86
		AAEL013754	0	0.71304	UPF0052 protein alr2298 OS=Anabaena sp. (strain PCC 7120) GN=alr2298 PE=3 SV=1	0.48
		AAEL013804	0	0.0886896	Protein translocase subunit secA OS=Mycoplasma penetrans GN=secA PE=3 SV=1	0.34	0.097
		AAEL014043	0	1.89685	Protein CASP OS=Arabidopsis thaliana GN=CASP PE=1 SV=2	2.4
		AAEL014056	0	0.630373	Putative metalloprotease Ctha_1783 OS=Chloroherpeton thalassium (strain ATCC	3.1
		AAEL014092	0	2.60167	Glucans biosynthesis glucosyltransferase H OS=Rhodopseudomonas palustris GN=opgH	3.2
		AAEL014223	0	12.9808	Ubiquinone biosynthesis protein COQ4, mitochondrial OS=Laccaria bicolor (strain	1.8
		AAEL014236	0	0.122488	Cyclic di-GMP-binding protein OS=Acetobacter xylinus GN=bcsBI PE=3 SV=1	5.4
		AAEL014300	0	0.833052	Probable histone-lysine N-methyltransferase ASH1L OS=Mus musculus GN=Ash1l PE=1	0.28
		AAEL014304	0	0.676647	30S ribosomal protein S1 OS=Rickettsia bellii (strain RML369-C) GN=rpsA PE=3	2.4
		AAEL014306	0	0.684308	30S ribosomal protein S1 OS=Rickettsia bellii (strain RML369-C) GN=rpsA PE=3	1.9
		AAEL014338	0	0.782428	Potassium-transporting ATPase A chain OS=Tolumonas auensis (strain DSM 9187 /	1.9
		AAEL014363	0	0.403772	UPF0577 protein KIAA1324 OS=Homo sapiens GN=KIAA1324 PE=2 SV=2	0.52
		AAEL014380	0	1.46849	Uncharacterized helicase C6F12.16c OS=Schizosaccharomyces pombe GN=SPAC6F12.16c	4.6
		AAEL014410	0	2.50573	Uncharacterized ABC transporter ATP-binding protein HI0658 OS=Haemophilus	1.3
		AAEL014496	0	0.586867	Phospho-N-acetylmuramoyl-pentapeptide-transferase OS=Streptococcus gordonii	0.38
		AAEL014574	0	0.607546	Ras and Rab interactor 1 OS=Rattus norvegicus GN=Rin1 PE=2 SV=2	2.5
		AAEL014716	0	4.30424	Maltase-glucoamylase, intestinal OS=Homo sapiens GN=MGAM PE=1 SV=5	16
		AAEL014804	0	9.9685	NACHT, LRR and PYD domains-containing protein 11 OS=Homo sapiens GN=NLRP11 PE=2	35
		AAEL014894	0	2.77934	Protein ycf2 OS=Lemna minor GN=ycf2-A PE=3 SV=1	1.2
		AAEL015044	0	0.602153	Centrosomal protein of 63 kDa OS=Pongo abelii GN=CEP63 PE=2 SV=1	0.19	0.092
		AAEL015121	0	1.16117	Cytochrome P450 2D11 OS=Mus musculus GN=Cyp2d11 PE=2 SV=1	1.1
		AAEL015144	0	5.45865	Valyl-tRNA synthetase OS=Colwellia psychrerythraea (strain 34H / ATCC BAA-681)	4.1
		AAEL015243	0	3.10955	DnaJ-like protein MG200 OS=Mycoplasma genitalium GN=MG200 PE=4 SV=1	7
		AAEL015319	0	18.151	Argininosuccinate synthase OS=Corynebacterium glutamicum GN=argG PE=1 SV=2	6.9
		AAEL015451	0	10.8834	Hypoxia-inducible factor 3 alpha OS=Mus musculus GN=Hif3a PE=1 SV=1	0.93
		AAEL015515	0	43.2556	Cecropin-A OS=Aedes aegypti GN=CECA PE=1 SV=2	5e-24	7e-05
		AAEL015526	0	0.21819	2-isopropylmalate synthase OS=Corynebacterium efficiens GN=leuA PE=3 SV=1	1.2
		AAEL015600	0	0.747874	Putative serine/threonine-protein kinase F31E3.2 OS=Caenorhabditis elegans	20
		AAEL015611	0	2.49063	Glutamate-1-semialdehyde 2,1-aminomutase OS=Dechloromonas aromatica (strain RCB)	6	3e-53
		AAEL017053	0	5.96771	Hydrogenase expression/formation protein hupD OS=Rhizobium leguminosarum bv.	1.8
		AAEL017094	0	3.15959	Cannabinoid receptor 1 OS=Taeniopygia guttata GN=CNR1 PE=2 SV=1	21
		AAEL017100	0	1.34552
		AAEL017114	0	5.23289	Uncharacterized protein ycgP OS=Bacillus subtilis GN=ycgP PE=3 SV=2	7
		AAEL017127	0	1.75237	Serine-enriched protein OS=Drosophila melanogaster GN=gprs PE=4 SV=3	1.4
		AAEL017131	0	0.474295	Alkylated DNA repair protein alkB homolog 8 OS=Xenopus tropicalis GN=alkbh8 PE=2	9
		AAEL017151	0	4.93428	Isocitrate lyase OS=Solanum lycopersicum PE=2 SV=1	0.48
		AAEL017160	0	3.49159	Probable G-protein coupled receptor Mth-like 5 OS=Drosophila melanogaster	0.82
		AAEL017180	0	1.843	Putative uncharacterized transmembrane protein DDB_G0280807 OS=Dictyostelium	0.002
		AAEL017191	0	16.5983	Potassium transporter 5 OS=Arabidopsis thaliana GN=POT5 PE=1 SV=1	0.098	0.042
		AAEL017255	0	0.0938234
		AAEL017269	0	15.1824	U1 small nuclear ribonucleoprotein component SNU71 OS=Candida albicans GN=SNU71	4.1
		AAEL017287	0	10.2661	Arginyl-tRNA synthetase OS=Mycoplasma penetrans GN=argS PE=3 SV=1	3.2
		AAEL017343	0	0.593669	Actin-related protein 4 OS=Debaryomyces hansenii GN=ARP4 PE=3 SV=1	1.4
		AAEL017351	0	2.2635	Protein PR73 OS=Mouse mammary tumor virus (strain GR) PE=3 SV=1	58
		AAEL017358	0	12.5534	Uncharacterized calcium-binding protein C50C3.5 OS=Caenorhabditis elegans	5.3
		AAEL017401	0	7.08626	DNA mismatch repair protein mutS OS=Klebsiella pneumoniae subsp. pneumoniae	1.9
		AAEL017403	0	40.4256	Vitelline membrane protein 15a-2 OS=Aedes aegypti PE=1 SV=2	1e-57	4e-10
		AAEL017422	0	1.02047	GPI ethanolamine phosphate transferase 2 OS=Saccharomyces cerevisiae GN=LAS21	0.48
		AAEL017426	0	1.87754	DNA primase OS=Borrelia burgdorferi GN=dnaG PE=3 SV=1	26
		AAEL017429	0	8.56939	NADH-ubiquinone oxidoreductase chain 1 OS=Apis mellifera ligustica GN=ND1 PE=3	1.8
		AAEL017431	0	0.187074	N-acetyltransferase ESCO2 OS=Homo sapiens GN=ESCO2 PE=1 SV=1	59
		AAEL017477	0	9.77155	Cobyric acid synthase OS=Beijerinckia indica subsp. indica (strain ATCC 9039 /	12
		AAEL017491	0	35.0145	Deubiquitinating protein VCIP135 OS=Rattus norvegicus GN=Vcpip1 PE=1 SV=2	4.1
		AAEL017496	0	3.60453	Putative vacuolar protein sorting-associated protein 13B OS=Dictyostelium	4.1
		AAEL003966	0	2.99156	Protein amalgam OS=Drosophila melanogaster GN=Ama PE=1 SV=2	4e-23	0	antigen binding||binding	binding	antigen binding
		AAEL000176	0	0.0354539	Uncharacterized protein CG3556 OS=Drosophila melanogaster GN=CG3556 PE=2 SV=1	0	6e-08	chitin binding||polysaccharide binding||carbohydrate binding||binding	binding	carbohydrate binding
		AAEL000283	0	1.84945	C-type lectin domain family 6 member A OS=Mus musculus GN=Clec6a PE=1 SV=1	3e-10	4e-16	sugar binding||carbohydrate binding||binding	binding	carbohydrate binding
		AAEL001042	0	0.565484	Bypass of stop codon protein 1 OS=Saccharomyces cerevisiae GN=BSC1 PE=1 SV=1	4e-09	9e-14	chitin binding||polysaccharide binding||carbohydrate binding||binding	binding	carbohydrate binding
		AAEL003566	0	0.910216	Uncharacterized protein C21orf63 homolog OS=Mus musculus PE=1 SV=2	1e-26	5e-27	sugar binding||carbohydrate binding||binding	binding	carbohydrate binding
		AAEL004897	0	0.0974407	Probable chitinase 3 OS=Drosophila melanogaster GN=Cht3 PE=2 SV=2	1e-162	0	heparin binding||glycosaminoglycan binding||polysaccharide binding||carbohydrate binding||binding	binding	carbohydrate binding
		AAEL006451	0	13.8504	Serine/arginine repetitive matrix protein 2 OS=Mus musculus GN=Srrm2 PE=1 SV=2	0.018	0.009	chitin binding||polysaccharide binding||carbohydrate binding||binding	binding	carbohydrate binding
		AAEL008831	0	0.196751	Mucin-17 OS=Homo sapiens GN=MUC17 PE=1 SV=1	2e-09	9e-10	chitin binding||polysaccharide binding||carbohydrate binding||binding	binding	carbohydrate binding
		AAEL009238	0	1.22814	Centrosomal protein of 192 kDa OS=Homo sapiens GN=CEP192 PE=1 SV=2	0.0002	3e-70	chitin binding||polysaccharide binding||carbohydrate binding||binding	binding	carbohydrate binding
		AAEL009251	0	0.374988	Integumentary mucin C.1 (Fragment) OS=Xenopus laevis PE=2 SV=1	3e-07	3e-08	chitin binding||polysaccharide binding||carbohydrate binding||binding	binding	carbohydrate binding
		AAEL011768	0	1.02183	Hepatitis A virus cellular receptor 1 OS=Cercopithecus aethiops GN=HAVCR1 PE=1	7e-14	2e-16	chitin binding||polysaccharide binding||carbohydrate binding||binding	binding	carbohydrate binding
		AAEL012650	0	1.20313	Probable endochitinase OS=Caenorhabditis elegans GN=cht-1 PE=1 SV=1	0.0004	2e-07	chitin binding||polysaccharide binding||carbohydrate binding||binding	binding	carbohydrate binding
		AAEL013853	0	1.02894	Collectin-43 OS=Bos taurus GN=CL43 PE=1 SV=2	0.001	7e-97	sugar binding||carbohydrate binding||binding	binding	carbohydrate binding
		AAEL014385	0	1.11784	Macrophage mannose receptor 1 OS=Mus musculus GN=Mrc1 PE=1 SV=1	1e-10	2e-13	sugar binding||carbohydrate binding||binding	binding	carbohydrate binding
		AAEL005732	0	8.2376	Short-chain specific acyl-CoA dehydrogenase, mitochondrial OS=Rattus norvegicus	1e-104	0	acyl\-CoA binding||fatty acid binding||monocarboxylic acid binding||carboxylic acid binding||binding	binding	carboxylic acid binding
		AAEL010775	0	1.06306	Glutamate receptor 1 OS=Caenorhabditis elegans GN=glr-1 PE=1 SV=2	2e-10	4e-27	glutamate binding||amino acid binding||carboxylic acid binding||binding	binding	carboxylic acid binding
		AAEL004302	0	2.3749	Protein MCM10 homolog OS=Drosophila melanogaster GN=Mcm10 PE=1 SV=2	0	0	chromatin binding||binding	binding	chromatin binding
		AAEL008359	0	0.962764	Phospholipase D A OS=Dictyostelium discoideum GN=pldA PE=2 SV=1	0.012	0.0004	chromatin binding||binding	binding	chromatin binding
		AAEL008929	0	0.117677	Sushi, von Willebrand factor type A, EGF and pentraxin domain-containing protein	2e-88	0	chromatin binding||binding	binding	chromatin binding
		AAEL009605	0	1.40587	Transcriptional regulator ATRX homolog OS=Caenorhabditis elegans GN=xnp-1 PE=1	3e-11	1e-13	chromatin binding||binding	binding	chromatin binding
		AAEL009903	0	9.0216	Forkhead box protein N4 OS=Xenopus laevis GN=foxn4 PE=2 SV=1	2e-46	0	chromatin binding||binding	binding	chromatin binding
		AAEL011854	0	4.58793	Micronuclear linker histone polyprotein OS=Tetrahymena thermophila GN=MLH PE=1	2e-08	3e-10	chromatin binding||binding	binding	chromatin binding
		AAEL012546	0	4.01373	DNA replication licensing factor Mcm6 OS=Anopheles gambiae GN=Mcm6 PE=3 SV=3	0	0	chromatin binding||binding	binding	chromatin binding
		AAEL015048	0	0.663921	Telomere-associated protein RIF1 OS=Homo sapiens GN=RIF1 PE=1 SV=2	3e-05	4e-08	chromatin binding||binding	binding	chromatin binding
		AAEL010046	0	2.23038	Mps one binder kinase activator-like 1 OS=Drosophila melanogaster GN=mats PE=1	1e-113	0	kinase activator activity||enzyme activator activity||enzyme regulator activity	enzyme regulator activity	enzyme activator activity
		AAEL001282	0	7.77947	Putative pectinesterase/pectinesterase inhibitor 43 OS=Arabidopsis thaliana	0.012	0.006	enzyme inhibitor activity||enzyme regulator activity	enzyme regulator activity	enzyme inhibitor activity
		AAEL002398	0	0.362723	Thrombospondin type-1 domain-containing protein 4 OS=Homo sapiens GN=THSD4 PE=2	7e-19	1e-32	serine\-type endopeptidase inhibitor activity||endopeptidase inhibitor activity||peptidase inhibitor activity||enzyme inhibitor activity||enzyme regulator activity	enzyme regulator activity	enzyme inhibitor activity
		AAEL002554	0	2.49027	Anosmin-1 OS=Coturnix coturnix japonica GN=KAL1 PE=2 SV=1	5e-33	3e-58	peptidase inhibitor activity||enzyme inhibitor activity||enzyme regulator activity	enzyme regulator activity	enzyme inhibitor activity
		AAEL003653	0	0.0356825	Serpin B4 OS=Homo sapiens GN=SERPINB4 PE=1 SV=2	8e-22	2e-72	serine\-type endopeptidase inhibitor activity||endopeptidase inhibitor activity||peptidase inhibitor activity||enzyme inhibitor activity||enzyme regulator activity	enzyme regulator activity	enzyme inhibitor activity
		AAEL010401	0	0.333856	Protein dispatched OS=Drosophila melanogaster GN=disp PE=1 SV=1	0	0	serine\-type endopeptidase inhibitor activity||endopeptidase inhibitor activity||peptidase inhibitor activity||enzyme inhibitor activity||enzyme regulator activity	enzyme regulator activity	enzyme inhibitor activity
		AAEL005189	0	1.82568	Collagen alpha-1(XII) chain OS=Gallus gallus GN=COL12A1 PE=1 SV=3	1e-36	8e-39	extracellular matrix structural constituent||structural molecule activity	structural molecule activity	extracellular matrix structural constituent
		AAEL001294	0	3.35563	Protein takeout OS=Drosophila melanogaster GN=to PE=2 SV=1	1e-07	4e-22	hormone binding||binding	binding	hormone binding
		AAEL001323	0	1.74287	Protein takeout OS=Drosophila melanogaster GN=to PE=2 SV=1	3e-15	3e-36	hormone binding||binding	binding	hormone binding
		AAEL000026	0	0.804567	Tctex1 domain-containing protein 2 OS=Mus musculus GN=Tctex1d2 PE=2 SV=1	2e-22	1e-17	ATPase activity\, coupled||ATPase activity||nucleoside\-triphosphatase activity||pyrophosphatase activity||hydrolase activity\, acting on acid anhydrides\, in phosphorus\-containing anhydrides||hydrolase activity\, acting on acid anhydrides||hydrolase activity||catalytic activity	catalytic activity	hydrolase activity
		AAEL000040	0	1.61281	Chymotrypsin-C OS=Homo sapiens GN=CTRC PE=1 SV=2	1e-30	3e-31	serine\-type endopeptidase activity||serine\-type peptidase activity||peptidase activity\, acting on L\-amino acid peptides||peptidase activity||hydrolase activity||catalytic activity	catalytic activity	hydrolase activity
		AAEL000053	0	1.57559	Myotubularin-related protein 9 OS=Mus musculus GN=Mtmr9 PE=2 SV=2	1e-145	0	phosphatase activity||phosphoric ester hydrolase activity||hydrolase activity\, acting on ester bonds||hydrolase activity||catalytic activity	catalytic activity	hydrolase activity
		AAEL000224	0	0.381797	Serine proteinase stubble OS=Drosophila melanogaster GN=Sb PE=2 SV=2	4e-41	0	serine\-type endopeptidase activity||serine\-type peptidase activity||peptidase activity\, acting on L\-amino acid peptides||peptidase activity||hydrolase activity||catalytic activity	catalytic activity	hydrolase activity
		AAEL000312	0	9.65493	AP-3 complex subunit beta-1 OS=Homo sapiens GN=AP3B1 PE=1 SV=3	0.0008	0.001	aspartic\-type endopeptidase activity||aspartic\-type peptidase activity||peptidase activity\, acting on L\-amino acid peptides||peptidase activity||hydrolase activity||catalytic activity	catalytic activity	hydrolase activity
		AAEL000332	0	10.5461	Mitochondrial inner membrane protease ATP23 homolog OS=Danio rerio GN=zgc:162885	6e-44	0	metallopeptidase activity||peptidase activity\, acting on L\-amino acid peptides||peptidase activity||hydrolase activity||catalytic activity	catalytic activity	hydrolase activity
		AAEL000420	0	1.07624	Cathepsin O OS=Homo sapiens GN=CTSO PE=1 SV=1	7e-46	8e-43	cysteine\-type peptidase activity||peptidase activity\, acting on L\-amino acid peptides||peptidase activity||hydrolase activity||catalytic activity	catalytic activity	hydrolase activity
		AAEL000659	0	5.92138	Exosome complex exonuclease RRP43 OS=Homo sapiens GN=EXOSC8 PE=1 SV=1	1e-65	5e-69	hydrolase activity||catalytic activity	catalytic activity	hydrolase activity
		AAEL000889	0	0.143973	Glutactin OS=Drosophila melanogaster GN=Glt PE=1 SV=2	6e-57	3e-79	carboxylesterase activity||hydrolase activity\, acting on ester bonds||hydrolase activity||catalytic activity	catalytic activity	hydrolase activity
		AAEL001110	0	1.61035	Dual specificity protein phosphatase 22 OS=Homo sapiens GN=DUSP22 PE=1 SV=1	1e-45	0	hydrolase activity||catalytic activity	catalytic activity	hydrolase activity
		AAEL001229	0	6.51425	Zinc metalloproteinase nas-14 OS=Caenorhabditis elegans GN=nas-14 PE=2 SV=2	1e-23	6e-31	metalloendopeptidase activity||metallopeptidase activity||peptidase activity\, acting on L\-amino acid peptides||peptidase activity||hydrolase activity||catalytic activity	catalytic activity	hydrolase activity
		AAEL001367	0	1.90564	72 kDa inositol polyphosphate 5-phosphatase OS=Rattus norvegicus GN=Inpp5e PE=2	4e-87	0	inositol or phosphatidylinositol phosphatase activity||phosphatase activity||phosphoric ester hydrolase activity||hydrolase activity\, acting on ester bonds||hydrolase activity||catalytic activity	catalytic activity	hydrolase activity
		AAEL001718	0	0.235907	Putative ATP synthase subunit f, mitochondrial OS=Drosophila melanogaster	1e-38	4e-39	hydrogen\-exporting ATPase activity\, phosphorylative mechanism||ATPase activity\, coupled to transmembrane movement of ions\, phosphorylative mechanism||ATPase activity\, coupled to transmembrane movement of ions||ATPase activity\, coupled to transmembrane movement of substances||ATPase activity\, coupled to movement of substances||ATPase activity\, coupled||ATPase activity||nucleoside\-triphosp…	catalytic activity	hydrolase activity
		AAEL001773	0	0.274114	Ferrochelatase OS=Campylobacter concisus (strain 13826) GN=hemH PE=3 SV=1	0.54	1e-09	serine\-type endopeptidase activity||serine\-type peptidase activity||peptidase activity\, acting on L\-amino acid peptides||peptidase activity||hydrolase activity||catalytic activity	catalytic activity	hydrolase activity
		AAEL001789	0	0.468715	Peroxisomal leader peptide-processing protease OS=Mus musculus GN=Tysnd1 PE=1	5e-09	2e-33	hydrolase activity||catalytic activity	catalytic activity	hydrolase activity
		AAEL001799	0	0.568469	Putative polyprotein OS=Commelina yellow mottle virus PE=4 SV=2	0.21	0.08	m7G(5')pppN diphosphatase activity||pyrophosphatase activity||hydrolase activity\, acting on acid anhydrides\, in phosphorus\-containing anhydrides||hydrolase activity\, acting on acid anhydrides||hydrolase activity||catalytic activity	catalytic activity	hydrolase activity
		AAEL002195	0	0.898312	Protein CIP2A OS=Mus musculus GN=Kiaa1524 PE=2 SV=2	9e-13	4e-13	motor activity||nucleoside\-triphosphatase activity||pyrophosphatase activity||hydrolase activity\, acting on acid anhydrides\, in phosphorus\-containing anhydrides||hydrolase activity\, acting on acid anhydrides||hydrolase activity||catalytic activity	catalytic activity	hydrolase activity
		AAEL002276	0	4.78599	Coagulation factor XI OS=Homo sapiens GN=F11 PE=1 SV=1	2e-29	1e-29	serine\-type endopeptidase activity||serine\-type peptidase activity||peptidase activity\, acting on L\-amino acid peptides||peptidase activity||hydrolase activity||catalytic activity	catalytic activity	hydrolase activity
		AAEL002367	0	0.661361	Esterase B1 OS=Culex pipiens GN=B1 PE=3 SV=1	2e-61	0	carboxylesterase activity||hydrolase activity\, acting on ester bonds||hydrolase activity||catalytic activity	catalytic activity	hydrolase activity
		AAEL002378	0	0.154064	Esterase B1 OS=Culex pipiens GN=B1 PE=3 SV=1	1e-49	2e-67	carboxylesterase activity||hydrolase activity\, acting on ester bonds||hydrolase activity||catalytic activity	catalytic activity	hydrolase activity
		AAEL002432	0	0.198172	Endoplasmic reticulum metallopeptidase 1 OS=Mus musculus GN=Ermp1 PE=1 SV=2	1e-121	0	peptidase activity||hydrolase activity||catalytic activity	catalytic activity	hydrolase activity
		AAEL002482	0	5.78302	Peritrophin-1 OS=Anopheles gambiae GN=Aper1 PE=2 SV=2	7e-12	4e-10	chitinase activity||hydrolase activity\, hydrolyzing O\-glycosyl compounds||hydrolase activity\, acting on glycosyl bonds||hydrolase activity||catalytic activity	catalytic activity	hydrolase activity
		AAEL002515	0	1.10298	Lipase 1 OS=Drosophila melanogaster GN=Lip1 PE=2 SV=2	2e-75	2e-86	triacylglycerol lipase activity||carboxylesterase activity||hydrolase activity\, acting on ester bonds||hydrolase activity||catalytic activity	catalytic activity	hydrolase activity
		AAEL002562	0	4.12872	Ribonuclease P protein subunit p20 OS=Homo sapiens GN=POP7 PE=1 SV=2	7e-14	4e-20	hydrolase activity||catalytic activity	catalytic activity	hydrolase activity
		AAEL002632	0	0.0591756	Chymotrypsin-like protease CTRL-1 OS=Homo sapiens GN=CTRL PE=2 SV=1	1e-13	3e-13	hydrolase activity||catalytic activity	catalytic activity	hydrolase activity
		AAEL002686	0	15.6279	Testisin OS=Mus musculus GN=Prss21 PE=2 SV=2	2e-11	4e-12	hydrolase activity||catalytic activity	catalytic activity	hydrolase activity
		AAEL002714	0	0.412233	Kinesin-like protein KIF23 OS=Homo sapiens GN=KIF23 PE=1 SV=3	1e-152	0	microtubule motor activity||motor activity||nucleoside\-triphosphatase activity||pyrophosphatase activity||hydrolase activity\, acting on acid anhydrides\, in phosphorus\-containing anhydrides||hydrolase activity\, acting on acid anhydrides||hydrolase activity||catalytic activity	catalytic activity	hydrolase activity
		AAEL002871	0	2.51168	Unconventional myosin heavy chain 6 OS=Caenorhabditis elegans GN=hum-6 PE=1 SV=1	2e-05	3e-52	motor activity||nucleoside\-triphosphatase activity||pyrophosphatase activity||hydrolase activity\, acting on acid anhydrides\, in phosphorus\-containing anhydrides||hydrolase activity\, acting on acid anhydrides||hydrolase activity||catalytic activity	catalytic activity	hydrolase activity
		AAEL002877	0	0.414375	Osmotic avoidance abnormal protein 3 OS=Caenorhabditis elegans GN=osm-3 PE=2	1e-142	0	microtubule motor activity||motor activity||nucleoside\-triphosphatase activity||pyrophosphatase activity||hydrolase activity\, acting on acid anhydrides\, in phosphorus\-containing anhydrides||hydrolase activity\, acting on acid anhydrides||hydrolase activity||catalytic activity	catalytic activity	hydrolase activity
		AAEL003132	0	0.0509033	Intraflagellar transport protein 52 homolog OS=Mus musculus GN=Ift52 PE=2 SV=2	1e-101	0	microtubule motor activity||motor activity||nucleoside\-triphosphatase activity||pyrophosphatase activity||hydrolase activity\, acting on acid anhydrides\, in phosphorus\-containing anhydrides||hydrolase activity\, acting on acid anhydrides||hydrolase activity||catalytic activity	catalytic activity	hydrolase activity
		AAEL003195	0	1.91821	Liver carboxylesterase OS=Mesocricetus auratus PE=2 SV=1	3e-58	1e-91	carboxylesterase activity||hydrolase activity\, acting on ester bonds||hydrolase activity||catalytic activity	catalytic activity	hydrolase activity
		AAEL003219	0	1.39265	Serine protease easter OS=Drosophila melanogaster GN=ea PE=1 SV=3	1e-41	5e-51	serine\-type endopeptidase activity||serine\-type peptidase activity||peptidase activity\, acting on L\-amino acid peptides||peptidase activity||hydrolase activity||catalytic activity	catalytic activity	hydrolase activity
		AAEL003251	0	1.2367	Serine protease snake OS=Drosophila melanogaster GN=snk PE=1 SV=2	1e-18	8e-21	serine\-type endopeptidase activity||serine\-type peptidase activity||peptidase activity\, acting on L\-amino acid peptides||peptidase activity||hydrolase activity||catalytic activity	catalytic activity	hydrolase activity
		AAEL003307	0	0.0379033	Receptor-type tyrosine-protein phosphatase mu OS=Mus musculus GN=Ptprm PE=2 SV=1	1e-97	0	hydrolase activity||catalytic activity	catalytic activity	hydrolase activity
		AAEL003308	0	0.495849	Cationic trypsin OS=Bos taurus PE=1 SV=3	3e-32	1e-33	serine\-type endopeptidase activity||serine\-type peptidase activity||peptidase activity\, acting on L\-amino acid peptides||peptidase activity||hydrolase activity||catalytic activity	catalytic activity	hydrolase activity
		AAEL003322	0	0.248502	Serine/threonine-protein phosphatase rdgC OS=Drosophila melanogaster GN=rdgC	0	0	phosphoprotein phosphatase activity||phosphatase activity||phosphoric ester hydrolase activity||hydrolase activity\, acting on ester bonds||hydrolase activity||catalytic activity	catalytic activity	hydrolase activity
		AAEL003490	0	2.90559	Uncharacterized protein C2orf42 homolog OS=Mus musculus PE=2 SV=1	7e-21	2e-20	cysteine\-type endopeptidase activity||cysteine\-type peptidase activity||peptidase activity\, acting on L\-amino acid peptides||peptidase activity||hydrolase activity||catalytic activity	catalytic activity	hydrolase activity
		AAEL003520	0	0.891564	Serine proteinase stubble OS=Drosophila melanogaster GN=Sb PE=2 SV=2	6e-34	5e-93	serine\-type endopeptidase activity||serine\-type peptidase activity||peptidase activity\, acting on L\-amino acid peptides||peptidase activity||hydrolase activity||catalytic activity	catalytic activity	hydrolase activity
		AAEL003625	0	0.630972	Serine protease easter OS=Drosophila melanogaster GN=ea PE=1 SV=3	1e-47	7e-71	serine\-type endopeptidase activity||serine\-type peptidase activity||peptidase activity\, acting on L\-amino acid peptides||peptidase activity||hydrolase activity||catalytic activity	catalytic activity	hydrolase activity
		AAEL003722	0	1.51107	Ribonuclease UK114 OS=Homo sapiens GN=HRSP12 PE=1 SV=1	9e-19	5e-22	endoribonuclease activity||endonuclease activity||nuclease activity||hydrolase activity\, acting on ester bonds||hydrolase activity||catalytic activity	catalytic activity	hydrolase activity
		AAEL003742	0	0.763294	Glucosylceramidase OS=Sus scrofa GN=GBA PE=3 SV=1	3e-90	0	glucosylceramidase activity||ceramidase activity||hydrolase activity\, acting on carbon\-nitrogen (but not peptide) bonds\, in linear amides||hydrolase activity\, acting on carbon\-nitrogen (but not peptide) bonds||hydrolase activity||catalytic activity	catalytic activity	hydrolase activity
		AAEL003915	0	4.21256	Testicular acid phosphatase homolog OS=Xenopus laevis GN=acpt PE=2 SV=1	5e-59	6e-90	acid phosphatase activity||phosphatase activity||phosphoric ester hydrolase activity||hydrolase activity\, acting on ester bonds||hydrolase activity||catalytic activity	catalytic activity	hydrolase activity
		AAEL003951	0	1.51836	Calpain-B OS=Drosophila melanogaster GN=CalpB PE=1 SV=2	3e-24	1e-24	calcium\-dependent cysteine\-type endopeptidase activity||cysteine\-type endopeptidase activity||cysteine\-type peptidase activity||peptidase activity\, acting on L\-amino acid peptides||peptidase activity||hydrolase activity||catalytic activity	catalytic activity	hydrolase activity
		AAEL003974	0	4.42474	Calpain-A OS=Drosophila melanogaster GN=CalpA PE=1 SV=2	6e-48	3e-48	calcium\-dependent cysteine\-type endopeptidase activity||cysteine\-type endopeptidase activity||cysteine\-type peptidase activity||peptidase activity\, acting on L\-amino acid peptides||peptidase activity||hydrolase activity||catalytic activity	catalytic activity	hydrolase activity
		AAEL004082	0	0.767019	Pancreatic lipase-related protein 1 OS=Homo sapiens GN=PNLIPRP1 PE=1 SV=1	2e-53	0	hydrolase activity||catalytic activity	catalytic activity	hydrolase activity
		AAEL004145	0	0.871109	Structure-specific endonuclease subunit SLX1 homolog OS=Anopheles gambiae	2e-73	3e-52	nuclease activity||hydrolase activity\, acting on ester bonds||hydrolase activity||catalytic activity	catalytic activity	hydrolase activity
		AAEL004241	0	1.14915	Kinesin-like protein Nod OS=Drosophila melanogaster GN=nod PE=1 SV=1	4e-68	2e-68	microtubule motor activity||motor activity||nucleoside\-triphosphatase activity||pyrophosphatase activity||hydrolase activity\, acting on acid anhydrides\, in phosphorus\-containing anhydrides||hydrolase activity\, acting on acid anhydrides||hydrolase activity||catalytic activity	catalytic activity	hydrolase activity
		AAEL004251	0	0.396466	Dual specificity protein phosphatase 14 OS=Homo sapiens GN=DUSP14 PE=1 SV=1	3e-30	6e-46	protein tyrosine/serine/threonine phosphatase activity||phosphoprotein phosphatase activity||phosphatase activity||phosphoric ester hydrolase activity||hydrolase activity\, acting on ester bonds||hydrolase activity||catalytic activity	catalytic activity	hydrolase activity
		AAEL004295	0	1.3181	Glucose-6-phosphatase 3 OS=Homo sapiens GN=G6PC3 PE=1 SV=2	2e-28	1e-28	hydrolase activity||catalytic activity	catalytic activity	hydrolase activity
		AAEL004299	0	1.07158	Angiotensin-converting enzyme (Fragment) OS=Gallus gallus GN=ACE PE=2 SV=1	1e-127	0	carboxypeptidase activity||exopeptidase activity||peptidase activity\, acting on L\-amino acid peptides||peptidase activity||hydrolase activity||catalytic activity	catalytic activity	hydrolase activity
		AAEL004361	0	1.76232	Uncharacterized family 31 glucosidase KIAA1161 OS=Homo sapiens GN=KIAA1161 PE=1	4e-95	0	alpha\-glucosidase activity||glucosidase activity||hydrolase activity\, hydrolyzing O\-glycosyl compounds||hydrolase activity\, acting on glycosyl bonds||hydrolase activity||catalytic activity	catalytic activity	hydrolase activity
		AAEL004389	0	0.442887	Alpha-mannosidase 2 OS=Mus musculus GN=Man2a1 PE=1 SV=1	0	0	mannosyl\-oligosaccharide 1\,3\-1\,6\-alpha\-mannosidase activity||mannosyl\-oligosaccharide mannosidase activity||mannosidase activity||hydrolase activity\, hydrolyzing O\-glycosyl compounds||hydrolase activity\, acting on glycosyl bonds||hydrolase activity||catalytic activity	catalytic activity	hydrolase activity
		AAEL004443	0	0.723947	Nitrilase and fragile histidine triad fusion protein NitFhit OS=Drosophila	1e-129	0	bis(5'\-adenosyl)\-triphosphatase activity||nucleotide diphosphatase activity||pyrophosphatase activity||hydrolase activity\, acting on acid anhydrides\, in phosphorus\-containing anhydrides||hydrolase activity\, acting on acid anhydrides||hydrolase activity||catalytic activity	catalytic activity	hydrolase activity
		AAEL004487	0	1.21049	Probable serine hydrolase OS=Drosophila melanogaster GN=kraken PE=2 SV=1	3e-36	1e-44	serine hydrolase activity||hydrolase activity||catalytic activity	catalytic activity	hydrolase activity
		AAEL004555	0	3.17106	Origin recognition complex subunit 1 OS=Dictyostelium discoideum GN=orcA PE=3	0.014	0.003	nucleoside\-triphosphatase activity||pyrophosphatase activity||hydrolase activity\, acting on acid anhydrides\, in phosphorus\-containing anhydrides||hydrolase activity\, acting on acid anhydrides||hydrolase activity||catalytic activity	catalytic activity	hydrolase activity
		AAEL004571	0	2.22097	Probable O-sialoglycoprotein endopeptidase 2 OS=Drosophila melanogaster	1e-102	0	hydrolase activity||catalytic activity	catalytic activity	hydrolase activity
		AAEL004622	0	0.117563	Uncharacterized serine-rich protein C13G6.10c OS=Schizosaccharomyces pombe	0.015	0.007	hydrolase activity\, hydrolyzing O\-glycosyl compounds||hydrolase activity\, acting on glycosyl bonds||hydrolase activity||catalytic activity	catalytic activity	hydrolase activity
		AAEL004670	0	0.272599	Putative ATP synthase subunit f, mitochondrial OS=Drosophila melanogaster	8e-31	3e-31	hydrogen\-exporting ATPase activity\, phosphorylative mechanism||ATPase activity\, coupled to transmembrane movement of ions\, phosphorylative mechanism||ATPase activity\, coupled to transmembrane movement of ions||ATPase activity\, coupled to transmembrane movement of substances||ATPase activity\, coupled to movement of substances||ATPase activity\, coupled||ATPase activity||nucleoside\-triphosp…	catalytic activity	hydrolase activity
		AAEL004948	0	1.24575	Serine protease snake OS=Drosophila melanogaster GN=snk PE=1 SV=2	3e-36	7e-42	serine\-type endopeptidase activity||serine\-type peptidase activity||peptidase activity\, acting on L\-amino acid peptides||peptidase activity||hydrolase activity||catalytic activity	catalytic activity	hydrolase activity
		AAEL004963	0	2.35139	Putative ATP synthase subunit f, mitochondrial OS=Drosophila melanogaster	6e-31	2e-31	hydrogen\-exporting ATPase activity\, phosphorylative mechanism||ATPase activity\, coupled to transmembrane movement of ions\, phosphorylative mechanism||ATPase activity\, coupled to transmembrane movement of ions||ATPase activity\, coupled to transmembrane movement of substances||ATPase activity\, coupled to movement of substances||ATPase activity\, coupled||ATPase activity||nucleoside\-triphosp…	catalytic activity	hydrolase activity
		AAEL004996	0	0.528952	Trypsin-1 OS=Anopheles gambiae GN=TRYP1 PE=2 SV=3	5e-70	1e-65	serine\-type endopeptidase activity||serine\-type peptidase activity||peptidase activity\, acting on L\-amino acid peptides||peptidase activity||hydrolase activity||catalytic activity	catalytic activity	hydrolase activity
		AAEL005026	0	0.71376	Multidrug resistance-associated protein 1 OS=Gallus gallus GN=ABCC1 PE=2 SV=1	0	0	xenobiotic\-transporting ATPase activity||ATPase activity\, coupled to transmembrane movement of substances||ATPase activity\, coupled to movement of substances||ATPase activity\, coupled||ATPase activity||nucleoside\-triphosphatase activity||pyrophosphatase activity||hydrolase activity\, acting on acid anhydrides\, in phosphorus\-containing anhydrides||hydrolase activity\, acting on acid anhydri…	catalytic activity	hydrolase activity
		AAEL005076	0	0.502711	Endoplasmic reticulum aminopeptidase 2 OS=Homo sapiens GN=ERAP2 PE=1 SV=2	6e-60	0	aminopeptidase activity||exopeptidase activity||peptidase activity\, acting on L\-amino acid peptides||peptidase activity||hydrolase activity||catalytic activity	catalytic activity	hydrolase activity
		AAEL005101	0	1.37906	Esterase B1 OS=Culex pipiens GN=B1 PE=3 SV=1	8e-57	4e-96	carboxylesterase activity||hydrolase activity\, acting on ester bonds||hydrolase activity||catalytic activity	catalytic activity	hydrolase activity
		AAEL005166	0	0.0202269	Developmental protein eyes absent OS=Drosophila melanogaster GN=eya PE=1 SV=1	1e-173	0	hydrolase activity||catalytic activity	catalytic activity	hydrolase activity
		AAEL005178	0	3.90992	Esterase E4 OS=Myzus persicae PE=1 SV=1	1e-57	2e-80	juvenile\-hormone esterase activity||carboxylesterase activity||hydrolase activity\, acting on ester bonds||hydrolase activity||catalytic activity	catalytic activity	hydrolase activity
		AAEL005199	0	1.69506	Holliday junction ATP-dependent DNA helicase ruvA OS=Borrelia garinii GN=ruvA	0.69	1e-10	juvenile\-hormone esterase activity||carboxylesterase activity||hydrolase activity\, acting on ester bonds||hydrolase activity||catalytic activity	catalytic activity	hydrolase activity
		AAEL005207	0	0.659786	Membrane metallo-endopeptidase-like 1 OS=Rattus norvegicus GN=Mmel1 PE=1 SV=1	1e-175	0	hydrolase activity||catalytic activity	catalytic activity	hydrolase activity
		AAEL005614	0	0.479063	Trypsin alpha-4 OS=Lucilia cuprina PE=3 SV=1	9e-46	7e-45	serine\-type endopeptidase activity||serine\-type peptidase activity||peptidase activity\, acting on L\-amino acid peptides||peptidase activity||hydrolase activity||catalytic activity	catalytic activity	hydrolase activity
		AAEL005650	0	1.31594	Serine protease snake OS=Drosophila melanogaster GN=snk PE=1 SV=2	4e-46	2e-46	serine\-type endopeptidase activity||serine\-type peptidase activity||peptidase activity\, acting on L\-amino acid peptides||peptidase activity||hydrolase activity||catalytic activity	catalytic activity	hydrolase activity
		AAEL005654	0	0.574018	Serine protease snake OS=Drosophila melanogaster GN=snk PE=1 SV=2	4e-40	2e-40	serine\-type endopeptidase activity||serine\-type peptidase activity||peptidase activity\, acting on L\-amino acid peptides||peptidase activity||hydrolase activity||catalytic activity	catalytic activity	hydrolase activity
		AAEL005675	0	3.16236	Serine protease easter OS=Drosophila melanogaster GN=ea PE=1 SV=3	2e-16	7e-19	serine\-type endopeptidase activity||serine\-type peptidase activity||peptidase activity\, acting on L\-amino acid peptides||peptidase activity||hydrolase activity||catalytic activity	catalytic activity	hydrolase activity
		AAEL005718	0	0.677382	Serine proteinase stubble OS=Drosophila melanogaster GN=Sb PE=2 SV=2	1e-36	0	serine\-type endopeptidase activity||serine\-type peptidase activity||peptidase activity\, acting on L\-amino acid peptides||peptidase activity||hydrolase activity||catalytic activity	catalytic activity	hydrolase activity
		AAEL005753	0	2.0955	Serine protease snake OS=Drosophila melanogaster GN=snk PE=1 SV=2	1e-53	7e-54	serine\-type endopeptidase activity||serine\-type peptidase activity||peptidase activity\, acting on L\-amino acid peptides||peptidase activity||hydrolase activity||catalytic activity	catalytic activity	hydrolase activity
		AAEL005782	0	2.56934	Protein hook OS=Aedes aegypti GN=hk PE=3 SV=1	0.009	0.001	DNA clamp loader activity||protein\-DNA loading ATPase activity||DNA\-dependent ATPase activity||ATPase activity\, coupled||ATPase activity||nucleoside\-triphosphatase activity||pyrophosphatase activity||hydrolase activity\, acting on acid anhydrides\, in phosphorus\-containing anhydrides||hydrolase activity\, acting on acid anhydrides||hydrolase activity||catalytic activity	catalytic activity	hydrolase activity
		AAEL005792	0	1.58403	Serine protease snake OS=Drosophila melanogaster GN=snk PE=1 SV=2	3e-11	4e-14	serine\-type endopeptidase activity||serine\-type peptidase activity||peptidase activity\, acting on L\-amino acid peptides||peptidase activity||hydrolase activity||catalytic activity	catalytic activity	hydrolase activity
		AAEL005806	0	0.243502	Aminopeptidase N OS=Bos taurus GN=ANPEP PE=2 SV=4	0	0	aminopeptidase activity||exopeptidase activity||peptidase activity\, acting on L\-amino acid peptides||peptidase activity||hydrolase activity||catalytic activity	catalytic activity	hydrolase activity
		AAEL005812	0	1.76552	Vitamin K-dependent protein C (Fragment) OS=Oryctolagus cuniculus GN=PROC PE=2	1e-05	2e-06	serine\-type endopeptidase activity||serine\-type peptidase activity||peptidase activity\, acting on L\-amino acid peptides||peptidase activity||hydrolase activity||catalytic activity	catalytic activity	hydrolase activity
		AAEL005851	0	5.01907	Exosome complex exonuclease RRP42 OS=Homo sapiens GN=EXOSC7 PE=1 SV=2	7e-79	2e-97	3'\-5'\-exoribonuclease activity||exoribonuclease activity\, producing 5'\-phosphomonoesters||exonuclease activity\, active with either ribo\- or deoxyribonucleic acids and producing 5'\-phosphomonoesters||exonuclease activity||nuclease activity||hydrolase activity\, acting on ester bonds||hydrolase activity||catalytic activity	catalytic activity	hydrolase activity
		AAEL006123	0	0.780477	Serine protease gd OS=Drosophila melanogaster GN=gd PE=1 SV=1	1e-44	5e-45	serine\-type endopeptidase activity||serine\-type peptidase activity||peptidase activity\, acting on L\-amino acid peptides||peptidase activity||hydrolase activity||catalytic activity	catalytic activity	hydrolase activity
		AAEL006147	0	4.88226	Probable chitinase 2 OS=Drosophila melanogaster GN=Cht2 PE=1 SV=1	1e-118	0	chitinase activity||hydrolase activity\, hydrolyzing O\-glycosyl compounds||hydrolase activity\, acting on glycosyl bonds||hydrolase activity||catalytic activity	catalytic activity	hydrolase activity
		AAEL006223	0	2.43931	Replication factor C subunit 2 OS=Drosophila melanogaster GN=RfC4 PE=1 SV=1	3e-80	1e-80	ATP\-dependent DNA helicase activity||ATP\-dependent helicase activity||purine NTP\-dependent helicase activity||helicase activity||nucleoside\-triphosphatase activity||pyrophosphatase activity||hydrolase activity\, acting on acid anhydrides\, in phosphorus\-containing anhydrides||hydrolase activity\, acting on acid anhydrides||hydrolase activity||catalytic activity	catalytic activity	hydrolase activity
		AAEL006260	0	2.94395	Enteropeptidase OS=Bos taurus GN=PRSS7 PE=1 SV=1	2e-28	2e-29	serine\-type endopeptidase activity||serine\-type peptidase activity||peptidase activity\, acting on L\-amino acid peptides||peptidase activity||hydrolase activity||catalytic activity	catalytic activity	hydrolase activity
		AAEL006332	0	5.04101	Transcription termination factor 2 OS=Drosophila melanogaster GN=lds PE=1 SV=2	1e-15	6e-16	DNA\-dependent ATPase activity||ATPase activity\, coupled||ATPase activity||nucleoside\-triphosphatase activity||pyrophosphatase activity||hydrolase activity\, acting on acid anhydrides\, in phosphorus\-containing anhydrides||hydrolase activity\, acting on acid anhydrides||hydrolase activity||catalytic activity	catalytic activity	hydrolase activity
		AAEL006548	0	1.75961	Large envelope protein OS=Duck hepatitis B virus (isolate brown Shanghai duck	0.75	0.002	ubiquitin thiolesterase activity||thiolester hydrolase activity||hydrolase activity\, acting on ester bonds||hydrolase activity||catalytic activity	catalytic activity	hydrolase activity
		AAEL006777	0	0.19328	Transcription factor SOX-11 OS=Gallus gallus GN=SOX11 PE=2 SV=1	0.029	3e-20	metalloendopeptidase activity||metallopeptidase activity||peptidase activity\, acting on L\-amino acid peptides||peptidase activity||hydrolase activity||catalytic activity	catalytic activity	hydrolase activity
		AAEL006819	0	5.51122	Exosome complex exonuclease RRP46 OS=Homo sapiens GN=EXOSC5 PE=1 SV=1	8e-39	2e-45	3'\-5'\-exoribonuclease activity||exoribonuclease activity\, producing 5'\-phosphomonoesters||exonuclease activity\, active with either ribo\- or deoxyribonucleic acids and producing 5'\-phosphomonoesters||exonuclease activity||nuclease activity||hydrolase activity\, acting on ester bonds||hydrolase activity||catalytic activity	catalytic activity	hydrolase activity
		AAEL007006	0	2.00852	Proclotting enzyme OS=Tachypleus tridentatus PE=1 SV=1	9e-37	1e-60	serine\-type endopeptidase activity||serine\-type peptidase activity||peptidase activity\, acting on L\-amino acid peptides||peptidase activity||hydrolase activity||catalytic activity	catalytic activity	hydrolase activity
		AAEL007052	0	1.6485	Pancreatic triacylglycerol lipase (Fragment) OS=Equus caballus GN=PNLIP PE=1	1e-37	3e-56	triacylglycerol lipase activity||carboxylesterase activity||hydrolase activity\, acting on ester bonds||hydrolase activity||catalytic activity	catalytic activity	hydrolase activity
		AAEL007081	0	0.486358	Endothelin-converting enzyme 2 OS=Bos taurus GN=ECE2 PE=1 SV=2	1e-07	2e-92	metalloendopeptidase activity||metallopeptidase activity||peptidase activity\, acting on L\-amino acid peptides||peptidase activity||hydrolase activity||catalytic activity	catalytic activity	hydrolase activity
		AAEL007102	0	3.62011	Epidermis-specific serine protease-like protein OS=Mus musculus GN=Esspl PE=2	2e-20	1e-25	serine\-type endopeptidase activity||serine\-type peptidase activity||peptidase activity\, acting on L\-amino acid peptides||peptidase activity||hydrolase activity||catalytic activity	catalytic activity	hydrolase activity
		AAEL007106	0	0.306232	Plasminogen OS=Rattus norvegicus GN=Plg PE=2 SV=2	8e-10	4e-10	endopeptidase activity||peptidase activity\, acting on L\-amino acid peptides||peptidase activity||hydrolase activity||catalytic activity	catalytic activity	hydrolase activity
		AAEL007109	0	1.27449	Chymotrypsin-C OS=Rattus norvegicus GN=Ctrc PE=1 SV=1	3e-25	4e-27	hydrolase activity||catalytic activity	catalytic activity	hydrolase activity
		AAEL007171	0	2.68449	Protein phosphatase 1D OS=Homo sapiens GN=PPM1D PE=1 SV=1	3e-76	0	protein serine/threonine phosphatase activity||phosphoprotein phosphatase activity||phosphatase activity||phosphoric ester hydrolase activity||hydrolase activity\, acting on ester bonds||hydrolase activity||catalytic activity	catalytic activity	hydrolase activity
		AAEL007225	0	0.027577	Dynein heavy chain 8, axonemal OS=Homo sapiens GN=DNAH8 PE=1 SV=2	0	0	motor activity||nucleoside\-triphosphatase activity||pyrophosphatase activity||hydrolase activity\, acting on acid anhydrides\, in phosphorus\-containing anhydrides||hydrolase activity\, acting on acid anhydrides||hydrolase activity||catalytic activity	catalytic activity	hydrolase activity
		AAEL007364	0	0.66455	Nucleoside diphosphate-linked moiety X motif 18 OS=Danio rerio GN=nudt18 PE=2	6e-35	0	hydrolase activity||catalytic activity	catalytic activity	hydrolase activity
		AAEL007412	0	1.17313	Acid sphingomyelinase-like phosphodiesterase 3b OS=Homo sapiens GN=SMPDL3B PE=2	5e-65	0	sphingomyelin phosphodiesterase activity||phosphoric diester hydrolase activity||phosphoric ester hydrolase activity||hydrolase activity\, acting on ester bonds||hydrolase activity||catalytic activity	catalytic activity	hydrolase activity
		AAEL007438	0	0.831473	Inactive dipeptidyl peptidase 10 OS=Homo sapiens GN=DPP10 PE=1 SV=1	4e-25	0	dipeptidyl\-peptidase activity||exopeptidase activity||peptidase activity\, acting on L\-amino acid peptides||peptidase activity||hydrolase activity||catalytic activity	catalytic activity	hydrolase activity
		AAEL007511	0	0.422864	Serine proteinase stubble OS=Drosophila melanogaster GN=Sb PE=2 SV=2	1e-44	0	serine\-type endopeptidase activity||serine\-type peptidase activity||peptidase activity\, acting on L\-amino acid peptides||peptidase activity||hydrolase activity||catalytic activity	catalytic activity	hydrolase activity
		AAEL007602	0	1.31836	Trypsin-1 OS=Astacus fluviatilis PE=1 SV=1	1e-34	4e-42	serine\-type endopeptidase activity||serine\-type peptidase activity||peptidase activity\, acting on L\-amino acid peptides||peptidase activity||hydrolase activity||catalytic activity	catalytic activity	hydrolase activity
		AAEL007756	0	0.326889	Sn1-specific diacylglycerol lipase alpha OS=Homo sapiens GN=DAGLA PE=1 SV=3	1e-139	0	triacylglycerol lipase activity||carboxylesterase activity||hydrolase activity\, acting on ester bonds||hydrolase activity||catalytic activity	catalytic activity	hydrolase activity
		AAEL007801	0	0.397208	Exonuclease domain-containing protein 1 OS=Xenopus laevis GN=exod1 PE=2 SV=1	3e-56	4e-67	hydrolase activity||catalytic activity	catalytic activity	hydrolase activity
		AAEL007839	0	0.490432	Chitooligosaccharidolytic beta-N-acetylglucosaminidase OS=Bombyx mori PE=1 SV=1	1e-105	0	beta\-N\-acetylhexosaminidase activity||hexosaminidase activity||hydrolase activity\, hydrolyzing O\-glycosyl compounds||hydrolase activity\, acting on glycosyl bonds||hydrolase activity||catalytic activity	catalytic activity	hydrolase activity
		AAEL007978	0	0.601646	Angiotensin-converting enzyme OS=Rattus norvegicus GN=Ace PE=2 SV=1	6e-22	4e-57	peptidyl\-dipeptidase activity||exopeptidase activity||peptidase activity\, acting on L\-amino acid peptides||peptidase activity||hydrolase activity||catalytic activity	catalytic activity	hydrolase activity
		AAEL008035	0	0.793511	Probable ATP-dependent RNA helicase DHX34 OS=Mus musculus GN=Dhx34 PE=2 SV=2	0	0	helicase activity||nucleoside\-triphosphatase activity||pyrophosphatase activity||hydrolase activity\, acting on acid anhydrides\, in phosphorus\-containing anhydrides||hydrolase activity\, acting on acid anhydrides||hydrolase activity||catalytic activity	catalytic activity	hydrolase activity
		AAEL008108	0	11.2452	Guanine nucleotide-binding protein subunit beta-2 OS=Drosophila melanogaster	1e-154	0	GTPase activity||nucleoside\-triphosphatase activity||pyrophosphatase activity||hydrolase activity\, acting on acid anhydrides\, in phosphorus\-containing anhydrides||hydrolase activity\, acting on acid anhydrides||hydrolase activity||catalytic activity	catalytic activity	hydrolase activity
		AAEL008148	0	0.378181	N-glycosylase/DNA lyase OS=Homo sapiens GN=OGG1 PE=1 SV=2	2e-55	9e-63	oxidized purine base lesion DNA N\-glycosylase activity||oxidized base lesion DNA N\-glycosylase activity||DNA N\-glycosylase activity||hydrolase activity\, hydrolyzing N\-glycosyl compounds||hydrolase activity\, acting on glycosyl bonds||hydrolase activity||catalytic activity	catalytic activity	hydrolase activity
		AAEL008245	0	0.94419	Low choriolytic enzyme OS=Oryzias latipes GN=lce PE=1 SV=1	8e-25	1e-41	metalloendopeptidase activity||metallopeptidase activity||peptidase activity\, acting on L\-amino acid peptides||peptidase activity||hydrolase activity||catalytic activity	catalytic activity	hydrolase activity
		AAEL008308	0	3.07756	Neurogenic locus notch homolog protein 3 OS=Mus musculus GN=Notch3 PE=1 SV=1	0.47	0.082	serine\-type endopeptidase activity||serine\-type peptidase activity||peptidase activity\, acting on L\-amino acid peptides||peptidase activity||hydrolase activity||catalytic activity	catalytic activity	hydrolase activity
		AAEL008372	0	3.87434	Extracellular sulfatase SULF-1 homolog OS=Drosophila melanogaster GN=Sulf1 PE=1	1e-118	0	N\-acetylglucosamine\-6\-sulfatase activity||sulfuric ester hydrolase activity||hydrolase activity\, acting on ester bonds||hydrolase activity||catalytic activity	catalytic activity	hydrolase activity
		AAEL008501	0	4.61615	Transmembrane protease, serine 12 OS=Homo sapiens GN=TMPRSS12 PE=2 SV=1	0.003	0.0006	serine\-type endopeptidase activity||serine\-type peptidase activity||peptidase activity\, acting on L\-amino acid peptides||peptidase activity||hydrolase activity||catalytic activity	catalytic activity	hydrolase activity
		AAEL008559	0	1.21425	Glutaminase kidney isoform, mitochondrial OS=Rattus norvegicus GN=Gls PE=1 SV=2	1e-168	0	glutaminase activity||hydrolase activity\, acting on carbon\-nitrogen (but not peptide) bonds\, in linear amides||hydrolase activity\, acting on carbon\-nitrogen (but not peptide) bonds||hydrolase activity||catalytic activity	catalytic activity	hydrolase activity
		AAEL008821	0	5.08664	Oxysterol-binding protein homolog 1 OS=Saccharomyces cerevisiae GN=OSH1 PE=1	0.21	0.004	cysteine\-type endopeptidase activity||cysteine\-type peptidase activity||peptidase activity\, acting on L\-amino acid peptides||peptidase activity||hydrolase activity||catalytic activity	catalytic activity	hydrolase activity
		AAEL009196	0	0.145073	Calpain-11 OS=Homo sapiens GN=CAPN11 PE=1 SV=2	4e-66	2e-64	peptidase activity||hydrolase activity||catalytic activity	catalytic activity	hydrolase activity
		AAEL009227	0	0.563033	Kinesin-like protein KIF18A OS=Mus musculus GN=Kif18a PE=2 SV=1	1e-113	0	motor activity||nucleoside\-triphosphatase activity||pyrophosphatase activity||hydrolase activity\, acting on acid anhydrides\, in phosphorus\-containing anhydrides||hydrolase activity\, acting on acid anhydrides||hydrolase activity||catalytic activity	catalytic activity	hydrolase activity
		AAEL009254	0	0.336636	Fidgetin-like protein 1 OS=Xenopus laevis GN=fignl1 PE=2 SV=1	1e-128	0	ATPase activity||nucleoside\-triphosphatase activity||pyrophosphatase activity||hydrolase activity\, acting on acid anhydrides\, in phosphorus\-containing anhydrides||hydrolase activity\, acting on acid anhydrides||hydrolase activity||catalytic activity	catalytic activity	hydrolase activity
		AAEL009395	0	3.01244	Putative helicase mov-10-A OS=Danio rerio GN=mov10a PE=2 SV=2	3e-98	1e-98	helicase activity||nucleoside\-triphosphatase activity||pyrophosphatase activity||hydrolase activity\, acting on acid anhydrides\, in phosphorus\-containing anhydrides||hydrolase activity\, acting on acid anhydrides||hydrolase activity||catalytic activity	catalytic activity	hydrolase activity
		AAEL009411	0	0.116487	Putative helicase mov-10-A OS=Danio rerio GN=mov10a PE=2 SV=2	1e-101	0	helicase activity||nucleoside\-triphosphatase activity||pyrophosphatase activity||hydrolase activity\, acting on acid anhydrides\, in phosphorus\-containing anhydrides||hydrolase activity\, acting on acid anhydrides||hydrolase activity||catalytic activity	catalytic activity	hydrolase activity
		AAEL009482	0	0.122794	Atrial natriuretic peptide-converting enzyme OS=Homo sapiens GN=CORIN PE=1 SV=1	5e-40	0	serine\-type endopeptidase activity||serine\-type peptidase activity||peptidase activity\, acting on L\-amino acid peptides||peptidase activity||hydrolase activity||catalytic activity	catalytic activity	hydrolase activity
		AAEL009542	0	0.414841	Uncharacterized protein C05D11.9 OS=Caenorhabditis elegans GN=C05D11.9 PE=2 SV=2	4e-10	2e-45	ribonuclease MRP activity||ribonuclease activity||nuclease activity||hydrolase activity\, acting on ester bonds||hydrolase activity||catalytic activity	catalytic activity	hydrolase activity
		AAEL009642	0	11.4448	Cathepsin B OS=Bos taurus GN=CTSB PE=1 SV=5	2e-81	2e-86	endopeptidase activity||peptidase activity\, acting on L\-amino acid peptides||peptidase activity||hydrolase activity||catalytic activity	catalytic activity	hydrolase activity
		AAEL009655	0	0.100519	Dynactin subunit 1 OS=Drosophila melanogaster GN=Gl PE=1 SV=2	1e-11	5e-12	microtubule motor activity||motor activity||nucleoside\-triphosphatase activity||pyrophosphatase activity||hydrolase activity\, acting on acid anhydrides\, in phosphorus\-containing anhydrides||hydrolase activity\, acting on acid anhydrides||hydrolase activity||catalytic activity	catalytic activity	hydrolase activity
		AAEL009774	0	0.338673	Limulus clotting factor C OS=Carcinoscorpius rotundicauda PE=2 SV=1	1e-12	4e-12	serine\-type endopeptidase activity||serine\-type peptidase activity||peptidase activity\, acting on L\-amino acid peptides||peptidase activity||hydrolase activity||catalytic activity	catalytic activity	hydrolase activity
		AAEL009990	0	1.21294	Kinesin-related protein 13 OS=Dictyostelium discoideum GN=kif13 PE=1 SV=1	0.062	0.03	microtubule motor activity||motor activity||nucleoside\-triphosphatase activity||pyrophosphatase activity||hydrolase activity\, acting on acid anhydrides\, in phosphorus\-containing anhydrides||hydrolase activity\, acting on acid anhydrides||hydrolase activity||catalytic activity	catalytic activity	hydrolase activity
		AAEL009999	0	1.02111	Crossover junction endonuclease EME1 OS=Pongo abelii GN=EME1 PE=3 SV=1	1e-15	9e-23	hydrolase activity||catalytic activity	catalytic activity	hydrolase activity
		AAEL010105	0	0.784746	GTP-binding protein Rhes OS=Homo sapiens GN=RASD2 PE=2 SV=1	1e-33	1e-49	GTPase activity||nucleoside\-triphosphatase activity||pyrophosphatase activity||hydrolase activity\, acting on acid anhydrides\, in phosphorus\-containing anhydrides||hydrolase activity\, acting on acid anhydrides||hydrolase activity||catalytic activity	catalytic activity	hydrolase activity
		AAEL010144	0	0.150288	ADAMTS-like protein 3 OS=Homo sapiens GN=ADAMTSL3 PE=2 SV=3	1e-74	0	metalloendopeptidase activity||metallopeptidase activity||peptidase activity\, acting on L\-amino acid peptides||peptidase activity||hydrolase activity||catalytic activity	catalytic activity	hydrolase activity
		AAEL010197	0	0.0721869	Dynein intermediate chain 3, ciliary OS=Anthocidaris crassispina PE=2 SV=1	1e-160	0	motor activity||nucleoside\-triphosphatase activity||pyrophosphatase activity||hydrolase activity\, acting on acid anhydrides\, in phosphorus\-containing anhydrides||hydrolase activity\, acting on acid anhydrides||hydrolase activity||catalytic activity	catalytic activity	hydrolase activity
		AAEL010270	0	6.75154	Serine protease snake OS=Drosophila melanogaster GN=snk PE=1 SV=2	3e-40	1e-40	serine\-type endopeptidase activity||serine\-type peptidase activity||peptidase activity\, acting on L\-amino acid peptides||peptidase activity||hydrolase activity||catalytic activity	catalytic activity	hydrolase activity
		AAEL010389	0	1.00602	Esterase B1 OS=Culex pipiens GN=B1 PE=3 SV=1	1e-160	0	carboxylesterase activity||hydrolase activity\, acting on ester bonds||hydrolase activity||catalytic activity	catalytic activity	hydrolase activity
		AAEL010499	0	1.49137	Transcriptional regulator ATRX homolog OS=Drosophila melanogaster GN=XNP PE=1	1e-148	0	DNA helicase activity||helicase activity||nucleoside\-triphosphatase activity||pyrophosphatase activity||hydrolase activity\, acting on acid anhydrides\, in phosphorus\-containing anhydrides||hydrolase activity\, acting on acid anhydrides||hydrolase activity||catalytic activity	catalytic activity	hydrolase activity
		AAEL010539	0	0.190144	Calcium/calmodulin-dependent 3',5'-cyclic nucleotide phosphodiesterase 1C	1e-139	0	3'\,5'\-cyclic\-AMP phosphodiesterase activity||3'\,5'\-cyclic\-nucleotide phosphodiesterase activity||cyclic\-nucleotide phosphodiesterase activity||phosphoric diester hydrolase activity||phosphoric ester hydrolase activity||hydrolase activity\, acting on ester bonds||hydrolase activity||catalytic activity	catalytic activity	hydrolase activity
		AAEL010541	0	0.154251	Calcium/calmodulin-dependent 3',5'-cyclic nucleotide phosphodiesterase 1C	2e-11	4e-13	3'\,5'\-cyclic\-AMP phosphodiesterase activity||3'\,5'\-cyclic\-nucleotide phosphodiesterase activity||cyclic\-nucleotide phosphodiesterase activity||phosphoric diester hydrolase activity||phosphoric ester hydrolase activity||hydrolase activity\, acting on ester bonds||hydrolase activity||catalytic activity	catalytic activity	hydrolase activity
		AAEL010655	0	0.36325	Atrial natriuretic peptide-converting enzyme OS=Homo sapiens GN=CORIN PE=1 SV=1	1e-77	0	serine\-type endopeptidase activity||serine\-type peptidase activity||peptidase activity\, acting on L\-amino acid peptides||peptidase activity||hydrolase activity||catalytic activity	catalytic activity	hydrolase activity
		AAEL010753	0	1.95343	Sperm-associated antigen 7 OS=Mus musculus GN=Spag7 PE=1 SV=1	2e-45	1e-71	DNA helicase activity||helicase activity||nucleoside\-triphosphatase activity||pyrophosphatase activity||hydrolase activity\, acting on acid anhydrides\, in phosphorus\-containing anhydrides||hydrolase activity\, acting on acid anhydrides||hydrolase activity||catalytic activity	catalytic activity	hydrolase activity
		AAEL010770	0	3.53958	Probable replication factor C subunit 1 OS=Dictyostelium discoideum GN=rfc1 PE=3	3e-05	1e-05	DNA clamp loader activity||protein\-DNA loading ATPase activity||DNA\-dependent ATPase activity||ATPase activity\, coupled||ATPase activity||nucleoside\-triphosphatase activity||pyrophosphatase activity||hydrolase activity\, acting on acid anhydrides\, in phosphorus\-containing anhydrides||hydrolase activity\, acting on acid anhydrides||hydrolase activity||catalytic activity	catalytic activity	hydrolase activity
		AAEL010785	0	0.778447	Tyrosine-protein phosphatase 3 OS=Dictyostelium discoideum GN=ptpC PE=2 SV=2	0.1	0.051	phosphatase activity||phosphoric ester hydrolase activity||hydrolase activity\, acting on ester bonds||hydrolase activity||catalytic activity	catalytic activity	hydrolase activity
		AAEL010832	0	7.09972	Ribonuclease P/MRP protein subunit POP5 OS=Bos taurus GN=POP5 PE=2 SV=1	1e-13	3e-26	ribonuclease P activity||endoribonuclease activity\, producing 5'\-phosphomonoesters||endonuclease activity\, active with either ribo\- or deoxyribonucleic acids and producing 5'\-phosphomonoesters||endonuclease activity||nuclease activity||hydrolase activity\, acting on ester bonds||hydrolase activity||catalytic activity	catalytic activity	hydrolase activity
		AAEL010938	0	1.84055	Probable L-asparaginase GA20639 OS=Drosophila pseudoobscura pseudoobscura	3e-89	5e-88	asparaginase activity||hydrolase activity\, acting on carbon\-nitrogen (but not peptide) bonds\, in linear amides||hydrolase activity\, acting on carbon\-nitrogen (but not peptide) bonds||hydrolase activity||catalytic activity	catalytic activity	hydrolase activity
		AAEL011008	0	0.795929	Lipase member H-B OS=Xenopus laevis GN=liph-B PE=2 SV=1	6e-33	2e-41	phospholipase activity||lipase activity||hydrolase activity\, acting on ester bonds||hydrolase activity||catalytic activity	catalytic activity	hydrolase activity
		AAEL011144	0	0.716512	Pancreatic lipase-related protein 2 OS=Rattus norvegicus GN=Pnliprp2 PE=1 SV=1	4e-43	0	phospholipase activity||lipase activity||hydrolase activity\, acting on ester bonds||hydrolase activity||catalytic activity	catalytic activity	hydrolase activity
		AAEL011171	0	4.83788	Ras-related protein RabJ OS=Dictyostelium discoideum GN=rabJ PE=3 SV=1	1e-42	2e-78	GTPase activity||nucleoside\-triphosphatase activity||pyrophosphatase activity||hydrolase activity\, acting on acid anhydrides\, in phosphorus\-containing anhydrides||hydrolase activity\, acting on acid anhydrides||hydrolase activity||catalytic activity	catalytic activity	hydrolase activity
		AAEL011290	0	3.92343	Ubiquitin carboxyl-terminal hydrolase 1 OS=Rattus norvegicus GN=Usp1 PE=2 SV=1	0.02	1e-15	ubiquitin thiolesterase activity||thiolester hydrolase activity||hydrolase activity\, acting on ester bonds||hydrolase activity||catalytic activity	catalytic activity	hydrolase activity
		AAEL011307	0	0.210923	DNA repair protein RAD51 homolog 3 OS=Homo sapiens GN=RAD51C PE=1 SV=1	1e-40	3e-44	crossover junction endodeoxyribonuclease activity||endodeoxyribonuclease activity\, producing 3'\-phosphomonoesters||endonuclease activity\, active with either ribo\- or deoxyribonucleic acids and producing 3'\-phosphomonoesters||endonuclease activity||nuclease activity||hydrolase activity\, acting on ester bonds||hydrolase activity||catalytic activity	catalytic activity	hydrolase activity
		AAEL011616	0	0.862371	Transmembrane protease, serine 2 OS=Mus musculus GN=Tmprss2 PE=2 SV=2	3e-28	2e-28	hydrolase activity||catalytic activity	catalytic activity	hydrolase activity
		AAEL011649	0	1.6995	Helicase POLQ-like OS=Homo sapiens GN=HELQ PE=1 SV=1	1e-166	0	helicase activity||nucleoside\-triphosphatase activity||pyrophosphatase activity||hydrolase activity\, acting on acid anhydrides\, in phosphorus\-containing anhydrides||hydrolase activity\, acting on acid anhydrides||hydrolase activity||catalytic activity	catalytic activity	hydrolase activity
		AAEL011722	0	0.38561	Carboxypeptidase B OS=Astacus fluviatilis PE=1 SV=1	5e-81	0	carboxypeptidase activity||exopeptidase activity||peptidase activity\, acting on L\-amino acid peptides||peptidase activity||hydrolase activity||catalytic activity	catalytic activity	hydrolase activity
		AAEL011772	0	0.0516437	DNA repair protein RAD50 OS=Drosophila melanogaster GN=rad50 PE=1 SV=3	1e-73	6e-74	nuclease activity||hydrolase activity\, acting on ester bonds||hydrolase activity||catalytic activity	catalytic activity	hydrolase activity
		AAEL012087	0	0.118253	Chymotrypsin-C OS=Bos taurus GN=CTRC PE=1 SV=2	5e-27	2e-28	serine\-type endopeptidase activity||serine\-type peptidase activity||peptidase activity\, acting on L\-amino acid peptides||peptidase activity||hydrolase activity||catalytic activity	catalytic activity	hydrolase activity
		AAEL012143	0	4.63109	Caspase OS=Drosophila melanogaster GN=Ice PE=1 SV=2	1e-77	6e-78	cysteine\-type endopeptidase activity||cysteine\-type peptidase activity||peptidase activity\, acting on L\-amino acid peptides||peptidase activity||hydrolase activity||catalytic activity	catalytic activity	hydrolase activity
		AAEL012212	0	0.0294657	Protein unc-80 homolog OS=Drosophila melanogaster GN=CG18437 PE=2 SV=4	0	0	aspartic\-type endopeptidase activity||aspartic\-type peptidase activity||peptidase activity\, acting on L\-amino acid peptides||peptidase activity||hydrolase activity||catalytic activity	catalytic activity	hydrolase activity
		AAEL012292	0	3.41695	4-nitrophenylphosphatase OS=Schizosaccharomyces pombe GN=pho2 PE=2 SV=2	1e-29	1e-78	phosphoglycolate phosphatase activity||phosphatase activity||phosphoric ester hydrolase activity||hydrolase activity\, acting on ester bonds||hydrolase activity||catalytic activity	catalytic activity	hydrolase activity
		AAEL012418	0	2.71507	Plancitoxin-1 OS=Acanthaster planci PE=1 SV=1	2e-59	2e-73	endodeoxyribonuclease activity||deoxyribonuclease activity||nuclease activity||hydrolase activity\, acting on ester bonds||hydrolase activity||catalytic activity	catalytic activity	hydrolase activity
		AAEL012449	0	0.884856	Myosin-I heavy chain OS=Dictyostelium discoideum GN=myoI PE=1 SV=1	8e-84	0	ATPase activity\, coupled||ATPase activity||nucleoside\-triphosphatase activity||pyrophosphatase activity||hydrolase activity\, acting on acid anhydrides\, in phosphorus\-containing anhydrides||hydrolase activity\, acting on acid anhydrides||hydrolase activity||catalytic activity	catalytic activity	hydrolase activity
		AAEL012453	0	3.07028	Histone deacetylase HDT2 OS=Arabidopsis thaliana GN=HDT2 PE=1 SV=2	0.004	0.001	histone deacetylase activity||hydrolase activity\, acting on carbon\-nitrogen (but not peptide) bonds\, in linear amides||hydrolase activity\, acting on carbon\-nitrogen (but not peptide) bonds||hydrolase activity||catalytic activity	catalytic activity	hydrolase activity
		AAEL012454	0	2.43797	Putative ATP synthase subunit f, mitochondrial OS=Drosophila melanogaster	6e-31	2e-31	hydrogen\-exporting ATPase activity\, phosphorylative mechanism||ATPase activity\, coupled to transmembrane movement of ions\, phosphorylative mechanism||ATPase activity\, coupled to transmembrane movement of ions||ATPase activity\, coupled to transmembrane movement of substances||ATPase activity\, coupled to movement of substances||ATPase activity\, coupled||ATPase activity||nucleoside\-triphosp…	catalytic activity	hydrolase activity
		AAEL012563	0	1.39339	Collagenase OS=Hypoderma lineatum PE=1 SV=3	5e-31	1e-35	endopeptidase activity||peptidase activity\, acting on L\-amino acid peptides||peptidase activity||hydrolase activity||catalytic activity	catalytic activity	hydrolase activity
		AAEL012625	0	1.53992	Serine protease snake OS=Drosophila melanogaster GN=snk PE=1 SV=2	2e-18	1e-18	serine\-type endopeptidase activity||serine\-type peptidase activity||peptidase activity\, acting on L\-amino acid peptides||peptidase activity||hydrolase activity||catalytic activity	catalytic activity	hydrolase activity
		AAEL012759	0	2.25662	Hyaluronidase (Fragment) OS=Polistes annularis PE=1 SV=1	2e-29	4e-19	hydrolase activity||catalytic activity	catalytic activity	hydrolase activity
		AAEL012775	0	0.163474	Serine protease easter OS=Drosophila melanogaster GN=ea PE=1 SV=3	4e-24	2e-24	serine\-type endopeptidase activity||serine\-type peptidase activity||peptidase activity\, acting on L\-amino acid peptides||peptidase activity||hydrolase activity||catalytic activity	catalytic activity	hydrolase activity
		AAEL012777	0	1.10817	Serine protease snake OS=Drosophila melanogaster GN=snk PE=1 SV=2	4e-18	9e-20	serine\-type endopeptidase activity||serine\-type peptidase activity||peptidase activity\, acting on L\-amino acid peptides||peptidase activity||hydrolase activity||catalytic activity	catalytic activity	hydrolase activity
		AAEL012878	0	3.50977	Putative leucine-rich repeat-containing protein DDB_G0290503 OS=Dictyostelium	0.0002	0.0003	motor activity||nucleoside\-triphosphatase activity||pyrophosphatase activity||hydrolase activity\, acting on acid anhydrides\, in phosphorus\-containing anhydrides||hydrolase activity\, acting on acid anhydrides||hydrolase activity||catalytic activity	catalytic activity	hydrolase activity
		AAEL012953	0	7.59858	Limulus clotting factor C OS=Tachypleus tridentatus PE=1 SV=1	8e-32	8e-29	serine\-type endopeptidase activity||serine\-type peptidase activity||peptidase activity\, acting on L\-amino acid peptides||peptidase activity||hydrolase activity||catalytic activity	catalytic activity	hydrolase activity
		AAEL013008	0	0.0502442	Intraflagellar transport protein 52 homolog OS=Mus musculus GN=Ift52 PE=2 SV=2	1e-101	0	microtubule motor activity||motor activity||nucleoside\-triphosphatase activity||pyrophosphatase activity||hydrolase activity\, acting on acid anhydrides\, in phosphorus\-containing anhydrides||hydrolase activity\, acting on acid anhydrides||hydrolase activity||catalytic activity	catalytic activity	hydrolase activity
		AAEL013010	0	0.0221658	Developmental protein eyes absent OS=Drosophila melanogaster GN=eya PE=1 SV=1	1e-173	0	hydrolase activity||catalytic activity	catalytic activity	hydrolase activity
		AAEL013025	0	2.70298	Putative helicase MOV-10 OS=Gallus gallus GN=MOV10 PE=2 SV=1	6e-87	1e-83	hydrolase activity||catalytic activity	catalytic activity	hydrolase activity
		AAEL013033	0	2.57588	Vitamin K-dependent protein C OS=Rattus norvegicus GN=Proc PE=2 SV=1	4e-07	1e-07	serine\-type endopeptidase activity||serine\-type peptidase activity||peptidase activity\, acting on L\-amino acid peptides||peptidase activity||hydrolase activity||catalytic activity	catalytic activity	hydrolase activity
		AAEL013239	0	0.907647	Dorsal-ventral patterning protein tolloid OS=Drosophila melanogaster GN=tld PE=1	0	0	metalloendopeptidase activity||metallopeptidase activity||peptidase activity\, acting on L\-amino acid peptides||peptidase activity||hydrolase activity||catalytic activity	catalytic activity	hydrolase activity
		AAEL013427	0	2.31922	Limulus clotting factor C OS=Tachypleus tridentatus PE=1 SV=1	3e-31	2e-30	serine\-type endopeptidase activity||serine\-type peptidase activity||peptidase activity\, acting on L\-amino acid peptides||peptidase activity||hydrolase activity||catalytic activity	catalytic activity	hydrolase activity
		AAEL013432	0	1.95251	Serine protease snake OS=Drosophila melanogaster GN=snk PE=1 SV=2	9e-08	3e-08	serine\-type endopeptidase activity||serine\-type peptidase activity||peptidase activity\, acting on L\-amino acid peptides||peptidase activity||hydrolase activity||catalytic activity	catalytic activity	hydrolase activity
		AAEL013743	0	0.416161	Epidermis-type lipoxygenase 3 OS=Homo sapiens GN=ALOXE3 PE=1 SV=1	12	6e-06	metalloendopeptidase activity||metallopeptidase activity||peptidase activity\, acting on L\-amino acid peptides||peptidase activity||hydrolase activity||catalytic activity	catalytic activity	hydrolase activity
		AAEL013822	0	0.179723	Fanconi anemia group M protein OS=Homo sapiens GN=FANCM PE=1 SV=2	2e-43	6e-52	hydrolase activity||catalytic activity	catalytic activity	hydrolase activity
		AAEL013857	0	14.3337	Serine protease persephone OS=Drosophila melanogaster GN=psh PE=1 SV=1	8e-07	7e-14	peptidase activity||hydrolase activity||catalytic activity	catalytic activity	hydrolase activity
		AAEL014140	0	3.42492	Serine protease easter OS=Drosophila melanogaster GN=ea PE=1 SV=3	1e-42	2e-44	serine\-type endopeptidase activity||serine\-type peptidase activity||peptidase activity\, acting on L\-amino acid peptides||peptidase activity||hydrolase activity||catalytic activity	catalytic activity	hydrolase activity
		AAEL014181	0	0.495133	Receptor-type tyrosine-protein phosphatase mu OS=Mus musculus GN=Ptprm PE=2 SV=1	6e-97	0	hydrolase activity||catalytic activity	catalytic activity	hydrolase activity
		AAEL014321	0	0.782814	Glucosylceramidase OS=Sus scrofa GN=GBA PE=3 SV=1	9e-91	0	glucosylceramidase activity||ceramidase activity||hydrolase activity\, acting on carbon\-nitrogen (but not peptide) bonds\, in linear amides||hydrolase activity\, acting on carbon\-nitrogen (but not peptide) bonds||hydrolase activity||catalytic activity	catalytic activity	hydrolase activity
		AAEL014386	0	2.17721	Serine protease easter OS=Drosophila melanogaster GN=ea PE=1 SV=3	1e-17	2e-18	serine\-type endopeptidase activity||serine\-type peptidase activity||peptidase activity\, acting on L\-amino acid peptides||peptidase activity||hydrolase activity||catalytic activity	catalytic activity	hydrolase activity
		AAEL014387	0	0.631756	Transmembrane protease, serine 2 OS=Mus musculus GN=Tmprss2 PE=2 SV=2	1e-28	7e-29	hydrolase activity||catalytic activity	catalytic activity	hydrolase activity
		AAEL014391	0	2.1017	Dual specificity protein phosphatase 14 OS=Homo sapiens GN=DUSP14 PE=1 SV=1	7e-31	4e-46	protein tyrosine/serine/threonine phosphatase activity||phosphoprotein phosphatase activity||phosphatase activity||phosphoric ester hydrolase activity||hydrolase activity\, acting on ester bonds||hydrolase activity||catalytic activity	catalytic activity	hydrolase activity
		AAEL015012	0	0.786217	Probable E3 ubiquitin-protein ligase DDB_G0283893 OS=Dictyostelium discoideum	6e-05	3e-06	motor activity||nucleoside\-triphosphatase activity||pyrophosphatase activity||hydrolase activity\, acting on acid anhydrides\, in phosphorus\-containing anhydrides||hydrolase activity\, acting on acid anhydrides||hydrolase activity||catalytic activity	catalytic activity	hydrolase activity
		AAEL015013	0	3.10912	Lariat debranching enzyme OS=Drosophila pseudoobscura pseudoobscura GN=DBR1 PE=3	5e-39	2e-32	RNA lariat debranching enzyme activity||endoribonuclease activity\, producing 5'\-phosphomonoesters||endonuclease activity\, active with either ribo\- or deoxyribonucleic acids and producing 5'\-phosphomonoesters||endonuclease activity||nuclease activity||hydrolase activity\, acting on ester bonds||hydrolase activity||catalytic activity	catalytic activity	hydrolase activity
		AAEL015148	0	0.438293	Zinc finger protein 184 OS=Homo sapiens GN=ZNF184 PE=2 SV=3	2e-07	7e-09	metallopeptidase activity||peptidase activity\, acting on L\-amino acid peptides||peptidase activity||hydrolase activity||catalytic activity	catalytic activity	hydrolase activity
		AAEL015170	0	0.477134	Protein retinal degeneration B OS=Drosophila melanogaster GN=rdgB PE=1 SV=2	1e-136	0	calcium\-transporting ATPase activity||ATPase activity\, coupled to transmembrane movement of ions\, phosphorylative mechanism||ATPase activity\, coupled to transmembrane movement of ions||ATPase activity\, coupled to transmembrane movement of substances||ATPase activity\, coupled to movement of substances||ATPase activity\, coupled||ATPase activity||nucleoside\-triphosphatase activity||pyrophosp…	catalytic activity	hydrolase activity
		AAEL015233	0	0.998823	Adenosine deaminase-like protein OS=Drosophila melanogaster GN=Ada PE=2 SV=1	5e-77	2e-77	adenosine deaminase activity||hydrolase activity\, acting on carbon\-nitrogen (but not peptide) bonds\, in cyclic amidines||hydrolase activity\, acting on carbon\-nitrogen (but not peptide) bonds||hydrolase activity||catalytic activity	catalytic activity	hydrolase activity
		AAEL015326	0	1.82887	Lipase 1 OS=Drosophila melanogaster GN=Lip1 PE=2 SV=2	3e-75	7e-87	triacylglycerol lipase activity||carboxylesterase activity||hydrolase activity\, acting on ester bonds||hydrolase activity||catalytic activity	catalytic activity	hydrolase activity
		AAEL015551	0	0.301627	ABC transporter G family member 20 OS=Dictyostelium discoideum GN=abcG20 PE=3	9e-17	1e-52	ATPase activity\, coupled to transmembrane movement of substances||ATPase activity\, coupled to movement of substances||ATPase activity\, coupled||ATPase activity||nucleoside\-triphosphatase activity||pyrophosphatase activity||hydrolase activity\, acting on acid anhydrides\, in phosphorus\-containing anhydrides||hydrolase activity\, acting on acid anhydrides||hydrolase activity||catalytic activity	catalytic activity	hydrolase activity
		AAEL015570	0	1.23923	Probable ATP-dependent RNA helicase DHX34 OS=Mus musculus GN=Dhx34 PE=2 SV=2	1e-52	6e-87	helicase activity||nucleoside\-triphosphatase activity||pyrophosphatase activity||hydrolase activity\, acting on acid anhydrides\, in phosphorus\-containing anhydrides||hydrolase activity\, acting on acid anhydrides||hydrolase activity||catalytic activity	catalytic activity	hydrolase activity
		AAEL015637	0	0.425767	Serine protease easter OS=Drosophila melanogaster GN=ea PE=1 SV=3	4e-38	4e-47	serine\-type endopeptidase activity||serine\-type peptidase activity||peptidase activity\, acting on L\-amino acid peptides||peptidase activity||hydrolase activity||catalytic activity	catalytic activity	hydrolase activity
		AAEL016971	0	0.12634	Serine protease nudel OS=Drosophila melanogaster GN=ndl PE=1 SV=2	1e-155	0	serine\-type peptidase activity||peptidase activity\, acting on L\-amino acid peptides||peptidase activity||hydrolase activity||catalytic activity	catalytic activity	hydrolase activity
		AAEL016986	0	1.59463	Cleavage and polyadenylation specificity factor subunit 4 OS=Homo sapiens	1e-11	1e-12	endoribonuclease activity||endonuclease activity||nuclease activity||hydrolase activity\, acting on ester bonds||hydrolase activity||catalytic activity	catalytic activity	hydrolase activity
		AAEL016999	0	2.25496	Protein white OS=Anopheles gambiae GN=w PE=2 SV=1	0	0	eye pigment precursor transporter activity||ATPase activity\, coupled to transmembrane movement of substances||ATPase activity\, coupled to movement of substances||ATPase activity\, coupled||ATPase activity||nucleoside\-triphosphatase activity||pyrophosphatase activity||hydrolase activity\, acting on acid anhydrides\, in phosphorus\-containing anhydrides||hydrolase activity\, acting on acid anhyd…	catalytic activity	hydrolase activity
		AAEL017031	0	3.17598	cGMP-specific 3',5'-cyclic phosphodiesterase OS=Drosophila willistoni GN=Pde6	0	0	3'\,5'\-cyclic\-nucleotide phosphodiesterase activity||cyclic\-nucleotide phosphodiesterase activity||phosphoric diester hydrolase activity||phosphoric ester hydrolase activity||hydrolase activity\, acting on ester bonds||hydrolase activity||catalytic activity	catalytic activity	hydrolase activity
		AAEL017303	0	2.72936	Arylsulfatase B OS=Mus musculus GN=Arsb PE=2 SV=3	9e-43	2e-57	hydrolase activity||catalytic activity	catalytic activity	hydrolase activity
		AAEL017348	0	0.735538	Prolyl endopeptidase OS=Homo sapiens GN=PREP PE=1 SV=2	3e-26	8e-35	endopeptidase activity||peptidase activity\, acting on L\-amino acid peptides||peptidase activity||hydrolase activity||catalytic activity	catalytic activity	hydrolase activity
		AAEL017393	0	1.11809	1-phosphatidylinositol-4,5-bisphosphate phosphodiesterase classes I and II	0	0	phosphoinositide phospholipase C activity||inositol or phosphatidylinositol phosphodiesterase activity||phosphoric diester hydrolase activity||phosphoric ester hydrolase activity||hydrolase activity\, acting on ester bonds||hydrolase activity||catalytic activity	catalytic activity	hydrolase activity
		AAEL017399	0	0.575538	Glutamyl aminopeptidase OS=Bos taurus GN=ENPEP PE=2 SV=1	7e-39	1e-49	aminopeptidase activity||exopeptidase activity||peptidase activity\, acting on L\-amino acid peptides||peptidase activity||hydrolase activity||catalytic activity	catalytic activity	hydrolase activity
		AAEL017457	0	2.5922	Chymotrypsin-2 OS=Anopheles gambiae GN=CHYM2 PE=2 SV=3	3e-55	5e-41	serine\-type endopeptidase activity||serine\-type peptidase activity||peptidase activity\, acting on L\-amino acid peptides||peptidase activity||hydrolase activity||catalytic activity	catalytic activity	hydrolase activity
		AAEL000187	0	1.34931	LIM domain kinase 1 OS=Drosophila melanogaster GN=LIMK1 PE=1 SV=1	0	0	metal ion binding||cation binding||ion binding||binding	binding	ion binding
		AAEL000192	0	0.600755	Bromodomain adjacent to zinc finger domain protein 1A OS=Mus musculus GN=Baz1a	0.002	9e-19	metal ion binding||cation binding||ion binding||binding	binding	ion binding
		AAEL000250	0	0.3592	Forkhead box protein P1-B OS=Danio rerio GN=foxp1b PE=2 SV=1	2e-67	1e-67	zinc ion binding||transition metal ion binding||metal ion binding||cation binding||ion binding||binding	binding	ion binding
		AAEL000261	0	3.25536	Zinc finger protein 642 OS=Bos taurus GN=ZNF642 PE=2 SV=1	7e-35	1e-36	metal ion binding||cation binding||ion binding||binding	binding	ion binding
		AAEL000287	0	5.16155	Zinc finger protein 540 OS=Pongo abelii GN=ZNF540 PE=2 SV=1	1e-32	3e-31	metal ion binding||cation binding||ion binding||binding	binding	ion binding
		AAEL000337	0	5.95981	Zinc finger protein 619 OS=Homo sapiens GN=ZNF619 PE=2 SV=1	4e-12	2e-13	zinc ion binding||transition metal ion binding||metal ion binding||cation binding||ion binding||binding	binding	ion binding
		AAEL000456	0	1.35273	RING finger protein 122 OS=Homo sapiens GN=RNF122 PE=2 SV=2	3e-08	4e-09	zinc ion binding||transition metal ion binding||metal ion binding||cation binding||ion binding||binding	binding	ion binding
		AAEL000636	0	4.74105	Tenascin OS=Sus scrofa GN=TNC PE=1 SV=1	4e-36	0	calcium ion binding||metal ion binding||cation binding||ion binding||binding	binding	ion binding
		AAEL000768	0	0.98068	Zinc finger protein 62 OS=Mus musculus GN=Zfp62 PE=2 SV=1	3e-42	1e-42	metal ion binding||cation binding||ion binding||binding	binding	ion binding
		AAEL000806	0	0.768152	Vascular endothelial zinc finger 1 OS=Homo sapiens GN=VEZF1 PE=1 SV=1	0.0002	3e-05	metal ion binding||cation binding||ion binding||binding	binding	ion binding
		AAEL001034	0	0.0984481	Adenylate cyclase type 5 OS=Oryctolagus cuniculus GN=ADCY5 PE=1 SV=1	0	0	magnesium ion binding||metal ion binding||cation binding||ion binding||binding	binding	ion binding
		AAEL001111	0	0.652728	Zinc finger protein 81 OS=Homo sapiens GN=ZNF81 PE=1 SV=3	9e-49	3e-99	zinc ion binding||transition metal ion binding||metal ion binding||cation binding||ion binding||binding	binding	ion binding
		AAEL001139	0	0.0982575	BR serine/threonine-protein kinase 2 OS=Homo sapiens GN=BRSK2 PE=1 SV=3	0	0	magnesium ion binding||metal ion binding||cation binding||ion binding||binding	binding	ion binding
		AAEL001203	0	1.61895	S-acyltransferase TIP1 OS=Arabidopsis thaliana GN=TIP1 PE=2 SV=1	2e-57	0	zinc ion binding||transition metal ion binding||metal ion binding||cation binding||ion binding||binding	binding	ion binding
		AAEL001455	0	5.99951	Zinc finger protein 39 OS=Mus musculus GN=Zfp39 PE=2 SV=2	4e-23	3e-25	metal ion binding||cation binding||ion binding||binding	binding	ion binding
		AAEL001857	0	2.0929	Protein msta, isoform A OS=Drosophila melanogaster GN=msta PE=2 SV=3	2e-29	7e-77	zinc ion binding||transition metal ion binding||metal ion binding||cation binding||ion binding||binding	binding	ion binding
		AAEL001924	0	3.24423	Zinc finger protein 845 OS=Homo sapiens GN=ZNF845 PE=2 SV=2	2e-76	1e-78	metal ion binding||cation binding||ion binding||binding	binding	ion binding
		AAEL001941	0	0.311618	Zinc finger protein 28 OS=Homo sapiens GN=ZNF28 PE=2 SV=4	7e-48	3e-51	metal ion binding||cation binding||ion binding||binding	binding	ion binding
		AAEL001966	0	1.17244	Zinc finger protein 845 OS=Homo sapiens GN=ZNF845 PE=2 SV=2	2e-75	1e-74	metal ion binding||cation binding||ion binding||binding	binding	ion binding
		AAEL002044	0	0.210775	Endothelial zinc finger protein induced by tumor necrosis factor alpha OS=Homo	2e-30	8e-32	metal ion binding||cation binding||ion binding||binding	binding	ion binding
		AAEL002045	0	3.03921	Zinc finger protein 43 OS=Homo sapiens GN=ZNF43 PE=2 SV=4	4e-29	9e-29	zinc ion binding||transition metal ion binding||metal ion binding||cation binding||ion binding||binding	binding	ion binding
		AAEL002116	0	1.62774	45 kDa calcium-binding protein OS=Xenopus laevis GN=sdf4 PE=2 SV=1	9e-39	1e-73	calcium ion binding||metal ion binding||cation binding||ion binding||binding	binding	ion binding
		AAEL002310	0	1.76395	Protein lethal(2)k10201 OS=Drosophila melanogaster GN=l(2)k10201 PE=1 SV=2	2e-28	1e-28	zinc ion binding||transition metal ion binding||metal ion binding||cation binding||ion binding||binding	binding	ion binding
		AAEL002342	0	2.73264	Phosphoribosylamine--glycine ligase OS=Pyrococcus abyssi GN=purD PE=3 SV=1	1.9	2e-14	calcium ion binding||metal ion binding||cation binding||ion binding||binding	binding	ion binding
		AAEL002973	0	1.39073	Zinc finger protein 2 homolog OS=Homo sapiens GN=ZFP2 PE=2 SV=1	9e-71	9e-69	zinc ion binding||transition metal ion binding||metal ion binding||cation binding||ion binding||binding	binding	ion binding
		AAEL002981	0	0.0680298	Putative leucine-rich repeat-containing protein DDB_G0290503 OS=Dictyostelium	9e-24	2e-21	zinc ion binding||transition metal ion binding||metal ion binding||cation binding||ion binding||binding	binding	ion binding
		AAEL003017	0	1.23706	Serine/threonine-protein kinase phg2 OS=Dictyostelium discoideum GN=phg2 PE=1	0.017	6e-06	zinc ion binding||transition metal ion binding||metal ion binding||cation binding||ion binding||binding	binding	ion binding
		AAEL003211	0	11.9003	Beta,beta-carotene 15,15'-monooxygenase OS=Gallus gallus GN=BCMO1 PE=1 SV=1	2e-91	0	iron ion binding||transition metal ion binding||metal ion binding||cation binding||ion binding||binding	binding	ion binding
		AAEL003339	0	2.44662	Zinc finger and SCAN domain-containing protein 22 OS=Homo sapiens GN=ZSCAN22	5e-08	5e-12	zinc ion binding||transition metal ion binding||metal ion binding||cation binding||ion binding||binding	binding	ion binding
		AAEL003471	0	5.9619	Zinc finger protein Xfin OS=Xenopus laevis GN=xfin PE=1 SV=1	1e-36	5e-38	zinc ion binding||transition metal ion binding||metal ion binding||cation binding||ion binding||binding	binding	ion binding
		AAEL003529	0	0.497696	Zinc finger protein 26 OS=Mus musculus GN=Zfp26 PE=2 SV=2	6e-50	0	zinc ion binding||transition metal ion binding||metal ion binding||cation binding||ion binding||binding	binding	ion binding
		AAEL003549	0	1.12101	Zinc finger protein 521 OS=Xenopus laevis GN=znf521 PE=2 SV=1	9e-08	2e-48	zinc ion binding||transition metal ion binding||metal ion binding||cation binding||ion binding||binding	binding	ion binding
		AAEL003657	0	1.17151	Zinc finger protein 782 OS=Homo sapiens GN=ZNF782 PE=2 SV=1	5e-54	2e-53	metal ion binding||cation binding||ion binding||binding	binding	ion binding
		AAEL003692	0	0.593118	Zinc finger protein 674 OS=Homo sapiens GN=ZNF674 PE=1 SV=1	3e-48	8e-47	metal ion binding||cation binding||ion binding||binding	binding	ion binding
		AAEL003700	0	1.5678	Zinc finger protein 99 OS=Homo sapiens GN=ZNF99 PE=2 SV=2	3e-49	1e-48	metal ion binding||cation binding||ion binding||binding	binding	ion binding
		AAEL003978	0	0.63196	Transcriptional repressor scratch 1 OS=Homo sapiens GN=SCRT1 PE=1 SV=1	2e-54	6e-83	zinc ion binding||transition metal ion binding||metal ion binding||cation binding||ion binding||binding	binding	ion binding
		AAEL004224	0	0.235443	Zinc finger protein 595 OS=Homo sapiens GN=ZNF595 PE=2 SV=1	4e-32	2e-31	zinc ion binding||transition metal ion binding||metal ion binding||cation binding||ion binding||binding	binding	ion binding
		AAEL004269	0	2.7905	Neurocalcin homolog OS=Drosophila melanogaster GN=Nca PE=1 SV=2	1e-106	0	calcium ion binding||metal ion binding||cation binding||ion binding||binding	binding	ion binding
		AAEL004283	0	1.54979	Protein drumstick OS=Anopheles gambiae GN=drm PE=3 SV=1	6e-38	7e-36	zinc ion binding||transition metal ion binding||metal ion binding||cation binding||ion binding||binding	binding	ion binding
		AAEL004314	0	0.64566	Zinc finger MYND domain-containing protein 10 OS=Homo sapiens GN=ZMYND10 PE=1	0.012	0	zinc ion binding||transition metal ion binding||metal ion binding||cation binding||ion binding||binding	binding	ion binding
		AAEL004383	0	1.18843	Hexosaminidase domain-containing protein OS=Mus musculus GN=Hexdc PE=2 SV=1	2e-80	0	cation binding||ion binding||binding	binding	ion binding
		AAEL004459	0	3.4141	Zinc finger protein 564 OS=Homo sapiens GN=ZNF564 PE=2 SV=1	2.1	0.055	zinc ion binding||transition metal ion binding||metal ion binding||cation binding||ion binding||binding	binding	ion binding
		AAEL004519	0	0.414317	Zinc finger protein 93 OS=Homo sapiens GN=ZNF93 PE=2 SV=4	1e-30	2e-34	metal ion binding||cation binding||ion binding||binding	binding	ion binding
		AAEL004617	0	0.236829	FLYWCH-type zinc finger-containing protein 1 OS=Mus musculus GN=Flywch1 PE=2	0.096	0.041	metal ion binding||cation binding||ion binding||binding	binding	ion binding
		AAEL004898	0	0.610846	Tensin-4 OS=Bos taurus GN=TNS4 PE=2 SV=2	4e-12	3e-84	metal ion binding||cation binding||ion binding||binding	binding	ion binding
		AAEL005034	0	0.266996	Globin OS=Busycotypus canaliculatus PE=1 SV=1	4e-08	3e-07	iron ion binding||transition metal ion binding||metal ion binding||cation binding||ion binding||binding	binding	ion binding
		AAEL005098	0	2.53202	Cysteine-rich venom protein 1 OS=Pimpla hypochondriaca GN=cvp1 PE=1 SV=1	1e-05	3e-06	metal ion binding||cation binding||ion binding||binding	binding	ion binding
		AAEL005193	0	3.73097	Mediator of RNA polymerase II transcription subunit 14 OS=Candida albicans	3.4	0.092	calcium ion binding||metal ion binding||cation binding||ion binding||binding	binding	ion binding
		AAEL005274	0	0.576528	ATP-dependent DNA helicase Q4 OS=Mus musculus GN=Recql4 PE=2 SV=2	0.25	2e-05	zinc ion binding||transition metal ion binding||metal ion binding||cation binding||ion binding||binding	binding	ion binding
		AAEL005288	0	1.0391	E3 ubiquitin-protein ligase KCMF1 OS=Danio rerio GN=kcmf1 PE=2 SV=1	2e-15	1e-15	zinc ion binding||transition metal ion binding||metal ion binding||cation binding||ion binding||binding	binding	ion binding
		AAEL005470	0	0.986465	Peroxisome assembly factor 1 OS=Cricetulus griseus GN=PXMP3 PE=1 SV=1	5e-34	6e-63	zinc ion binding||transition metal ion binding||metal ion binding||cation binding||ion binding||binding	binding	ion binding
		AAEL005577	0	0.819695	Zinc finger protein 154 OS=Homo sapiens GN=ZNF154 PE=2 SV=3	1e-18	2e-19	metal ion binding||cation binding||ion binding||binding	binding	ion binding
		AAEL005582	0	0.164711	Zinc finger protein 33B OS=Homo sapiens GN=ZNF33B PE=2 SV=2	2e-07	1e-07	metal ion binding||cation binding||ion binding||binding	binding	ion binding
		AAEL005584	0	0.486842	Zinc finger protein 26 OS=Mus musculus GN=Zfp26 PE=2 SV=2	2e-36	3e-37	metal ion binding||cation binding||ion binding||binding	binding	ion binding
		AAEL005589	0	3.08693	Zinc finger protein 710 OS=Mus musculus GN=Znf710 PE=2 SV=1	2e-14	1e-14	zinc ion binding||transition metal ion binding||metal ion binding||cation binding||ion binding||binding	binding	ion binding
		AAEL005668	0	0.898333	Cubilin OS=Canis familiaris GN=CUBN PE=1 SV=1	6e-06	9e-05	calcium ion binding||metal ion binding||cation binding||ion binding||binding	binding	ion binding
		AAEL005700	0	0.207114	Cytochrome P450 4c21 OS=Blattella germanica GN=CYP4C21 PE=2 SV=1	5e-53	3e-53	iron ion binding||transition metal ion binding||metal ion binding||cation binding||ion binding||binding	binding	ion binding
		AAEL005838	0	1.75884	Zinc finger protein 595 OS=Homo sapiens GN=ZNF595 PE=2 SV=1	4e-23	2e-22	metal ion binding||cation binding||ion binding||binding	binding	ion binding
		AAEL005916	0	2.96981	Zinc finger protein 181 OS=Bos taurus GN=ZNF181 PE=2 SV=1	6e-18	5e-16	zinc ion binding||transition metal ion binding||metal ion binding||cation binding||ion binding||binding	binding	ion binding
		AAEL005938	0	2.50763	Zinc finger protein 546 OS=Homo sapiens GN=ZNF546 PE=2 SV=2	1e-17	1e-22	zinc ion binding||transition metal ion binding||metal ion binding||cation binding||ion binding||binding	binding	ion binding
		AAEL005983	0	0.69282	Fibulin-1 OS=Caenorhabditis elegans GN=fbl-1 PE=1 SV=3	4e-35	2e-35	calcium ion binding||metal ion binding||cation binding||ion binding||binding	binding	ion binding
		AAEL006156	0	0.579201	E3 ubiquitin-protein ligase TRIM37 OS=Mus musculus GN=Trim37 PE=2 SV=1	5e-21	2e-21	zinc ion binding||transition metal ion binding||metal ion binding||cation binding||ion binding||binding	binding	ion binding
		AAEL006252	0	1.07415	Phenylalanyl-tRNA synthetase beta chain OS=Corynebacterium glutamicum GN=pheT	0.23	0.023	zinc ion binding||transition metal ion binding||metal ion binding||cation binding||ion binding||binding	binding	ion binding
		AAEL006268	0	1.68555	SH3 and cysteine-rich domain-containing protein 2 OS=Homo sapiens GN=STAC2 PE=2	4e-12	1e-41	metal ion binding||cation binding||ion binding||binding	binding	ion binding
		AAEL006348	0	1.87949	Putative endonuclease BB_0411 OS=Borrelia burgdorferi GN=BB_0411 PE=3 SV=1	0.005	3e-77	metal ion binding||cation binding||ion binding||binding	binding	ion binding
		AAEL006392	0	2.3377	Zinc finger and BTB domain-containing protein 7B OS=Mus musculus GN=Zbtb7b PE=1	4e-19	2e-22	zinc ion binding||transition metal ion binding||metal ion binding||cation binding||ion binding||binding	binding	ion binding
		AAEL006459	0	2.31426	Zinc finger protein 26 OS=Mus musculus GN=Zfp26 PE=2 SV=2	6e-36	3e-36	metal ion binding||cation binding||ion binding||binding	binding	ion binding
		AAEL006608	0	0.315382	Zinc finger protein 91 OS=Homo sapiens GN=ZNF91 PE=2 SV=1	1e-153	0	metal ion binding||cation binding||ion binding||binding	binding	ion binding
		AAEL006615	0	0.0767707	Zinc finger protein 658 OS=Homo sapiens GN=ZNF658 PE=2 SV=2	3e-97	3e-96	metal ion binding||cation binding||ion binding||binding	binding	ion binding
		AAEL006631	0	1.2803	Zinc finger protein 569 OS=Mus musculus GN=Znf569 PE=2 SV=1	5e-47	2e-49	metal ion binding||cation binding||ion binding||binding	binding	ion binding
		AAEL006657	0	0.715251	Gag polyprotein OS=Koala retrovirus GN=gag PE=3 SV=3	0.007	0.0001	zinc ion binding||transition metal ion binding||metal ion binding||cation binding||ion binding||binding	binding	ion binding
		AAEL007244	0	0.874711	Zinc finger protein 569 OS=Homo sapiens GN=ZNF569 PE=2 SV=1	2e-65	1e-65	zinc ion binding||transition metal ion binding||metal ion binding||cation binding||ion binding||binding	binding	ion binding
		AAEL007260	0	0.193318	Gastrula zinc finger protein XlCGF46.1 (Fragment) OS=Xenopus laevis PE=3 SV=1	1e-22	0	zinc ion binding||transition metal ion binding||metal ion binding||cation binding||ion binding||binding	binding	ion binding
		AAEL007299	0	2.7251	Putative fat-like cadherin-related tumor suppressor homolog OS=Drosophila	1e-31	0	calcium ion binding||metal ion binding||cation binding||ion binding||binding	binding	ion binding
		AAEL007323	0	9.04715	Deoxyuridine 5'-triphosphate nucleotidohydrolase, mitochondrial OS=Homo sapiens	5e-53	2e-57	magnesium ion binding||metal ion binding||cation binding||ion binding||binding	binding	ion binding
		AAEL007361	0	0.805583	Gag polyprotein OS=Koala retrovirus GN=gag PE=3 SV=3	0.32	2e-05	zinc ion binding||transition metal ion binding||metal ion binding||cation binding||ion binding||binding	binding	ion binding
		AAEL007426	0	4.09353	Protein ariadne-2 OS=Drosophila melanogaster GN=ari-2 PE=1 SV=1	0	0	metal ion binding||cation binding||ion binding||binding	binding	ion binding
		AAEL007564	0	4.1245	Zinc finger protein 782 OS=Homo sapiens GN=ZNF782 PE=2 SV=1	1e-55	2e-57	metal ion binding||cation binding||ion binding||binding	binding	ion binding
		AAEL007654	0	0.949901	Zinc finger protein 26 OS=Mus musculus GN=Zfp26 PE=2 SV=2	5e-46	2e-46	metal ion binding||cation binding||ion binding||binding	binding	ion binding
		AAEL007716	0	0.977558	Anoctamin-4 OS=Mus musculus GN=Ano4 PE=2 SV=2	0	0	chloride ion binding||anion binding||ion binding||binding	binding	ion binding
		AAEL007896	0	0.990121	Zinc finger protein 112 homolog OS=Homo sapiens GN=ZFP112 PE=2 SV=1	2e-47	5e-48	metal ion binding||cation binding||ion binding||binding	binding	ion binding
		AAEL008423	0	3.08868	Paraneoplastic antigen-like protein 5 OS=Mus musculus GN=Pnma5 PE=2 SV=2	0.48	1e-06	zinc ion binding||transition metal ion binding||metal ion binding||cation binding||ion binding||binding	binding	ion binding
		AAEL008493	0	1.28782	Zinc finger protein 177 OS=Homo sapiens GN=ZNF177 PE=2 SV=3	3e-39	0	zinc ion binding||transition metal ion binding||metal ion binding||cation binding||ion binding||binding	binding	ion binding
		AAEL008511	0	0.192158	E3 ubiquitin-protein ligase TRIM37 OS=Homo sapiens GN=TRIM37 PE=1 SV=2	2e-07	2e-07	zinc ion binding||transition metal ion binding||metal ion binding||cation binding||ion binding||binding	binding	ion binding
		AAEL008721	0	2.64059	Zinc finger protein 681 OS=Homo sapiens GN=ZNF681 PE=2 SV=1	1e-63	2e-83	metal ion binding||cation binding||ion binding||binding	binding	ion binding
		AAEL008722	0	0.402528	Zinc finger protein 253 OS=Homo sapiens GN=ZNF253 PE=2 SV=2	7e-27	1e-77	zinc ion binding||transition metal ion binding||metal ion binding||cation binding||ion binding||binding	binding	ion binding
		AAEL009336	0	10.643	Troponin C, isoform 1 OS=Drosophila melanogaster GN=TpnC41C PE=1 SV=2	9e-45	3e-59	calcium ion binding||metal ion binding||cation binding||ion binding||binding	binding	ion binding
		AAEL009522	0	2.84634	Zinc finger protein Xfin OS=Xenopus laevis GN=xfin PE=1 SV=1	8e-49	2e-49	metal ion binding||cation binding||ion binding||binding	binding	ion binding
		AAEL009727	0	4.36527	Protein suppressor of hairy wing OS=Drosophila ananassae GN=su(Hw) PE=2 SV=1	0.0002	1e-06	zinc ion binding||transition metal ion binding||metal ion binding||cation binding||ion binding||binding	binding	ion binding
		AAEL009730	0	2.58712	Extensin OS=Nicotiana tabacum GN=HRGPNT3 PE=2 SV=1	8e-08	1e-08	zinc ion binding||transition metal ion binding||metal ion binding||cation binding||ion binding||binding	binding	ion binding
		AAEL009996	0	1.11194	Zinc finger protein 28 OS=Homo sapiens GN=ZNF28 PE=2 SV=4	3e-33	5e-35	zinc ion binding||transition metal ion binding||metal ion binding||cation binding||ion binding||binding	binding	ion binding
		AAEL010010	0	3.4363	Zinc finger and BTB domain-containing protein 41 OS=Mus musculus GN=Zbtb41 PE=2	8e-33	4e-33	zinc ion binding||transition metal ion binding||metal ion binding||cation binding||ion binding||binding	binding	ion binding
		AAEL010281	0	0.240736	Putative zinc finger protein 840 OS=Homo sapiens GN=ZNF840 PE=5 SV=5	1e-43	3e-40	metal ion binding||cation binding||ion binding||binding	binding	ion binding
		AAEL010370	0	0.800724	Xanthine dehydrogenase/oxidase OS=Gallus gallus GN=XDH PE=2 SV=1	1e-171	0	iron ion binding||transition metal ion binding||metal ion binding||cation binding||ion binding||binding	binding	ion binding
		AAEL010492	0	2.83467	Zinc finger protein 658 OS=Homo sapiens GN=ZNF658 PE=2 SV=2	6e-53	9e-55	metal ion binding||cation binding||ion binding||binding	binding	ion binding
		AAEL010583	0	3.64474	RanBP-type and C3HC4-type zinc finger-containing protein 1 OS=Mus musculus	4e-75	6e-78	metal ion binding||cation binding||ion binding||binding	binding	ion binding
		AAEL010924	0	1.19024	Calcium-activated chloride channel regulator 2 OS=Mus musculus GN=Clca2 PE=2	3e-50	1e-50	chloride ion binding||anion binding||ion binding||binding	binding	ion binding
		AAEL011108	0	0.763715	Protein phosphatase 1E OS=Rattus norvegicus GN=Ppm1e PE=2 SV=1	5e-59	2e-59	magnesium ion binding||metal ion binding||cation binding||ion binding||binding	binding	ion binding
		AAEL011159	0	2.19204	Cartilage-associated protein OS=Mus musculus GN=Crtap PE=2 SV=2	1e-37	7e-38	iron ion binding||transition metal ion binding||metal ion binding||cation binding||ion binding||binding	binding	ion binding
		AAEL011615	0	1.38241	Rab5 GDP/GTP exchange factor OS=Mus musculus GN=Rabgef1 PE=2 SV=1	8e-64	0	metal ion binding||cation binding||ion binding||binding	binding	ion binding
		AAEL011705	0	1.76515	Zinc finger protein 235 OS=Mus musculus GN=Znf235 PE=2 SV=1	1e-26	2e-28	zinc ion binding||transition metal ion binding||metal ion binding||cation binding||ion binding||binding	binding	ion binding
		AAEL011715	0	1.29043	Non-structural maintenance of chromosomes element 1 homolog OS=Drosophila	2e-28	5e-17	zinc ion binding||transition metal ion binding||metal ion binding||cation binding||ion binding||binding	binding	ion binding
		AAEL011847	0	4.46948	Zinc finger protein hangover OS=Drosophila melanogaster GN=hang PE=1 SV=3	2e-27	1e-24	metal ion binding||cation binding||ion binding||binding	binding	ion binding
		AAEL011887	0	2.16784	Zinc finger protein 429 OS=Homo sapiens GN=ZNF429 PE=1 SV=2	8e-47	8e-48	metal ion binding||cation binding||ion binding||binding	binding	ion binding
		AAEL011911	0	7.33195	Zinc finger protein Gfi-1b OS=Mus musculus GN=Gfi1b PE=1 SV=1	4e-27	8e-30	zinc ion binding||transition metal ion binding||metal ion binding||cation binding||ion binding||binding	binding	ion binding
		AAEL011973	0	9.0734	Fumarylacetoacetase OS=Bos taurus GN=FAH PE=2 SV=1	1e-144	0	magnesium ion binding||metal ion binding||cation binding||ion binding||binding	binding	ion binding
		AAEL012006	0	1.8067	E3 ubiquitin-protein ligase At1g63170 OS=Arabidopsis thaliana GN=At1g63170 PE=2	1e-08	5e-09	zinc ion binding||transition metal ion binding||metal ion binding||cation binding||ion binding||binding	binding	ion binding
		AAEL012040	0	9.4083	Zinc finger protein 667 OS=Rattus norvegicus GN=Znf667 PE=2 SV=1	1e-22	5e-23	zinc ion binding||transition metal ion binding||metal ion binding||cation binding||ion binding||binding	binding	ion binding
		AAEL012112	0	0.190448	RanBP-type and C3HC4-type zinc finger-containing protein 1 OS=Mus musculus	7e-59	3e-59	metal ion binding||cation binding||ion binding||binding	binding	ion binding
		AAEL012176	0	1.61702	Zinc finger protein 39 OS=Mus musculus GN=Zfp39 PE=2 SV=2	3e-24	2e-24	zinc ion binding||transition metal ion binding||metal ion binding||cation binding||ion binding||binding	binding	ion binding
		AAEL012177	0	0.323443	Zinc finger protein 682 OS=Homo sapiens GN=ZNF682 PE=2 SV=1	1e-24	4e-27	metal ion binding||cation binding||ion binding||binding	binding	ion binding
		AAEL012389	0	3.60586	Zinc finger protein 830 OS=Danio rerio GN=znf830 PE=2 SV=1	3e-40	1e-40	zinc ion binding||transition metal ion binding||metal ion binding||cation binding||ion binding||binding	binding	ion binding
		AAEL012392	0	0.826636	Zinc finger protein 271 OS=Pongo abelii GN=ZNF271 PE=2 SV=1	8e-44	5e-42	metal ion binding||cation binding||ion binding||binding	binding	ion binding
		AAEL012432	0	0.968612	Gag polyprotein OS=Koala retrovirus GN=gag PE=3 SV=3	0.1	0.01	zinc ion binding||transition metal ion binding||metal ion binding||cation binding||ion binding||binding	binding	ion binding
		AAEL012441	0	4.05292	RING finger protein 17 OS=Macaca fascicularis GN=RNF17 PE=2 SV=2	0.0002	3e-05	metal ion binding||cation binding||ion binding||binding	binding	ion binding
		AAEL012566	0	2.76073	Zinc finger protein 596 OS=Homo sapiens GN=ZNF596 PE=2 SV=2	7e-29	9e-31	zinc ion binding||transition metal ion binding||metal ion binding||cation binding||ion binding||binding	binding	ion binding
		AAEL012693	0	0.0707302	E3 ubiquitin-protein ligase TRIM37 OS=Mus musculus GN=Trim37 PE=2 SV=1	8e-58	4e-58	zinc ion binding||transition metal ion binding||metal ion binding||cation binding||ion binding||binding	binding	ion binding
		AAEL012761	0	0.0441698	Cytochrome P450 4C1 OS=Blaberus discoidalis GN=CYP4C1 PE=2 SV=1	3e-54	2e-56	iron ion binding||transition metal ion binding||metal ion binding||cation binding||ion binding||binding	binding	ion binding
		AAEL012834	0	1.15252	Zinc finger protein draculin OS=Danio rerio GN=drl PE=2 SV=2	5e-11	1e-14	zinc ion binding||transition metal ion binding||metal ion binding||cation binding||ion binding||binding	binding	ion binding
		AAEL012889	0	0.636026	Early endosome antigen 1 OS=Mus musculus GN=Eea1 PE=2 SV=2	2e-10	1e-32	metal ion binding||cation binding||ion binding||binding	binding	ion binding
		AAEL013019	0	0.719996	Zinc finger protein 471 OS=Homo sapiens GN=ZNF471 PE=2 SV=1	4e-31	9e-30	metal ion binding||cation binding||ion binding||binding	binding	ion binding
		AAEL013165	0	1.48664	Zinc finger protein Xfin OS=Xenopus laevis GN=xfin PE=1 SV=1	4e-48	7e-48	metal ion binding||cation binding||ion binding||binding	binding	ion binding
		AAEL013204	0	1.20599	E3 ubiquitin-protein ligase TRIM37 OS=Mus musculus GN=Trim37 PE=2 SV=1	2e-15	8e-16	zinc ion binding||transition metal ion binding||metal ion binding||cation binding||ion binding||binding	binding	ion binding
		AAEL013399	0	2.26524	Zinc finger protein 26 OS=Mus musculus GN=Zfp26 PE=2 SV=2	7e-42	8e-39	metal ion binding||cation binding||ion binding||binding	binding	ion binding
		AAEL013452	0	6.32845	C-type lectin domain family 4 member M OS=Hylobates concolor GN=CLEC4M PE=3 SV=1	0.4	3e-14	calcium ion binding||metal ion binding||cation binding||ion binding||binding	binding	ion binding
		AAEL013552	0	0.817596	Zinc finger protein 623 OS=Homo sapiens GN=ZNF623 PE=2 SV=1	7e-18	3e-24	metal ion binding||cation binding||ion binding||binding	binding	ion binding
		AAEL013626	0	0.0955683	Zinc finger protein 420 OS=Bos taurus GN=ZNF420 PE=2 SV=1	8e-56	3e-53	metal ion binding||cation binding||ion binding||binding	binding	ion binding
		AAEL013799	0	1.02536	Zinc finger and BTB domain-containing protein 41 OS=Mus musculus GN=Zbtb41 PE=2	2e-20	1e-22	zinc ion binding||transition metal ion binding||metal ion binding||cation binding||ion binding||binding	binding	ion binding
		AAEL014066	0	0.164928	RanBP-type and C3HC4-type zinc finger-containing protein 1 OS=Mus musculus	3e-65	7e-72	metal ion binding||cation binding||ion binding||binding	binding	ion binding
		AAEL014076	0	3.67703	RanBP-type and C3HC4-type zinc finger-containing protein 1 OS=Mus musculus	2e-46	3e-47	metal ion binding||cation binding||ion binding||binding	binding	ion binding
		AAEL014112	0	4.24146	Zinc finger protein 77 OS=Homo sapiens GN=ZNF77 PE=2 SV=2	2e-43	5e-53	zinc ion binding||transition metal ion binding||metal ion binding||cation binding||ion binding||binding	binding	ion binding
		AAEL014145	0	0.579808	Myoneurin OS=Homo sapiens GN=MYNN PE=1 SV=1	3e-20	3e-26	metal ion binding||cation binding||ion binding||binding	binding	ion binding
		AAEL014180	0	4.13223	E3 ubiquitin-protein ligase TRIM37 OS=Mus musculus GN=Trim37 PE=2 SV=1	3e-10	2e-10	zinc ion binding||transition metal ion binding||metal ion binding||cation binding||ion binding||binding	binding	ion binding
		AAEL014210	0	0.243071	Zinc finger protein 595 OS=Homo sapiens GN=ZNF595 PE=2 SV=1	5e-33	7e-33	zinc ion binding||transition metal ion binding||metal ion binding||cation binding||ion binding||binding	binding	ion binding
		AAEL014211	0	0.166153	Zinc finger protein 551 OS=Homo sapiens GN=ZNF551 PE=1 SV=3	5e-32	6e-32	zinc ion binding||transition metal ion binding||metal ion binding||cation binding||ion binding||binding	binding	ion binding
		AAEL014245	0	1.8954	Polyhomeotic-like protein 3 OS=Mus musculus GN=Phc3 PE=1 SV=1	0.04	0.02	metal ion binding||cation binding||ion binding||binding	binding	ion binding
		AAEL014291	0	0.217255	Zinc finger protein 761 OS=Homo sapiens GN=ZNF761 PE=2 SV=2	1e-47	1e-51	metal ion binding||cation binding||ion binding||binding	binding	ion binding
		AAEL014706	0	1.94924	Centrosome-associated protein CEP250 OS=Homo sapiens GN=CEP250 PE=1 SV=2	9e-79	9e-83	metal ion binding||cation binding||ion binding||binding	binding	ion binding
		AAEL014756	0	0.735032	Zinc finger and BTB domain-containing protein 41 OS=Homo sapiens GN=ZBTB41 PE=2	2e-27	4e-28	zinc ion binding||transition metal ion binding||metal ion binding||cation binding||ion binding||binding	binding	ion binding
		AAEL014852	0	1.04138	Notch homolog 2 N-terminal-like protein OS=Homo sapiens GN=NOTCH2NL PE=1 SV=1	5e-06	1e-06	calcium ion binding||metal ion binding||cation binding||ion binding||binding	binding	ion binding
		AAEL014880	0	0.308451	Zinc finger and BTB domain-containing protein 41 OS=Mus musculus GN=Zbtb41 PE=2	4e-24	2e-24	zinc ion binding||transition metal ion binding||metal ion binding||cation binding||ion binding||binding	binding	ion binding
		AAEL015005	0	0.414125	Zinc finger protein hangover OS=Drosophila melanogaster GN=hang PE=1 SV=3	0.23	0.0009	zinc ion binding||transition metal ion binding||metal ion binding||cation binding||ion binding||binding	binding	ion binding
		AAEL015200	0	0.745991	Zinc finger protein PLAGL2 OS=Homo sapiens GN=PLAGL2 PE=2 SV=1	2e-14	5e-67	metal ion binding||cation binding||ion binding||binding	binding	ion binding
		AAEL015307	0	0.462629	Putative uncharacterized protein DDB_G0289963 OS=Dictyostelium discoideum	0.0005	0.0005	calcium ion binding||metal ion binding||cation binding||ion binding||binding	binding	ion binding
		AAEL015347	0	0.335857	Zinc finger protein 41 OS=Homo sapiens GN=ZNF41 PE=1 SV=2	1e-35	2e-37	metal ion binding||cation binding||ion binding||binding	binding	ion binding
		AAEL015563	0	0.733388	Cytochrome P450 4c21 OS=Blattella germanica GN=CYP4C21 PE=2 SV=1	9e-48	3e-43	iron ion binding||transition metal ion binding||metal ion binding||cation binding||ion binding||binding	binding	ion binding
		AAEL016977	0	1.96021	FLYWCH-type zinc finger-containing protein 1 OS=Homo sapiens GN=FLYWCH1 PE=1	0.0001	0.0006	metal ion binding||cation binding||ion binding||binding	binding	ion binding
		AAEL017002	0	2.21057	THAP domain-containing protein 5 OS=Gallus gallus GN=THAP5 PE=2 SV=1	0.018	0.0008	zinc ion binding||transition metal ion binding||metal ion binding||cation binding||ion binding||binding	binding	ion binding
		AAEL017254	0	1.26905	Male-specific lethal 2 homolog OS=Mus musculus GN=Msl2 PE=2 SV=2	5e-15	2e-15	metal ion binding||cation binding||ion binding||binding	binding	ion binding
		AAEL017288	0	3.39149	FLYWCH-type zinc finger-containing protein 1 OS=Homo sapiens GN=FLYWCH1 PE=1	0.0001	0.0001	metal ion binding||cation binding||ion binding||binding	binding	ion binding
		AAEL000029	0	1.65843	Protein yellow OS=Drosophila guanche GN=y PE=3 SV=1	4e-59	0	dopachrome isomerase activity||intramolecular oxidoreductase activity\, transposing C=C bonds||intramolecular oxidoreductase activity||isomerase activity||catalytic activity	catalytic activity	isomerase activity
		AAEL014052	0	1.4722	Protein windbeutel OS=Drosophila melanogaster GN=wbl PE=1 SV=1	2e-44	8e-45	protein disulfide isomerase activity||intramolecular oxidoreductase activity\, interconverting keto\- and enol\-groups||intramolecular oxidoreductase activity||isomerase activity||catalytic activity	catalytic activity	isomerase activity
		AAEL014288	0	0.139348	Aldose 1-epimerase OS=Sus scrofa GN=GALM PE=2 SV=1	4e-08	2e-11	isomerase activity||catalytic activity	catalytic activity	isomerase activity
		AAEL004492	0	4.53717	Cyclin-dependent kinases regulatory subunit OS=Drosophila melanogaster GN=Cks30A	3e-34	1e-34	cyclin\-dependent protein kinase regulator activity||protein kinase regulator activity||kinase regulator activity||enzyme regulator activity	enzyme regulator activity	kinase regulator activity
		AAEL005232	0	1.66763	Probable cyclin-dependent kinases regulatory subunit OS=Physarum polycephalum	3e-27	3e-34	cyclin\-dependent protein kinase regulator activity||protein kinase regulator activity||kinase regulator activity||enzyme regulator activity	enzyme regulator activity	kinase regulator activity
		AAEL008256	0	1.37773	Cyclin-J OS=Mus musculus GN=Ccnj PE=2 SV=2	6e-28	2e-29	cyclin\-dependent protein kinase regulator activity||protein kinase regulator activity||kinase regulator activity||enzyme regulator activity	enzyme regulator activity	kinase regulator activity
		AAEL009057	0	2.54236	G1/S-specific cyclin-E OS=Drosophila melanogaster GN=CycE PE=1 SV=2	1e-121	0	cyclin\-dependent protein kinase regulator activity||protein kinase regulator activity||kinase regulator activity||enzyme regulator activity	enzyme regulator activity	kinase regulator activity
		AAEL010708	0	1.01523	G1/S-specific cyclin-D3 OS=Homo sapiens GN=CCND3 PE=1 SV=2	0.038	1e-14	cyclin\-dependent protein kinase regulator activity||protein kinase regulator activity||kinase regulator activity||enzyme regulator activity	enzyme regulator activity	kinase regulator activity
		AAEL013397	0	6.50817	Cyclin-C OS=Aedes aegypti GN=CycC PE=3 SV=1	1e-153	0	cyclin\-dependent protein kinase regulator activity||protein kinase regulator activity||kinase regulator activity||enzyme regulator activity	enzyme regulator activity	kinase regulator activity
		AAEL000570	0	43.5402	RING-box protein 2 OS=Mus musculus GN=Rnf7 PE=2 SV=1	2e-13	2e-16	ubiquitin\-protein ligase activity||small conjugating protein ligase activity||acid\-amino acid ligase activity||ligase activity\, forming carbon\-nitrogen bonds||ligase activity||catalytic activity	catalytic activity	ligase activity
		AAEL000578	0	0.415102	Tubulin glycylase 3B OS=Drosophila melanogaster GN=TTLL3B PE=1 SV=2	3e-94	1e-94	tubulin\-glycine ligase activity||protein\-glycine ligase activity||acid\-amino acid ligase activity||ligase activity\, forming carbon\-nitrogen bonds||ligase activity||catalytic activity	catalytic activity	ligase activity
		AAEL000588	0	16.4794	RING-box protein 2 OS=Mus musculus GN=Rnf7 PE=2 SV=1	2e-25	5e-32	ubiquitin\-protein ligase activity||small conjugating protein ligase activity||acid\-amino acid ligase activity||ligase activity\, forming carbon\-nitrogen bonds||ligase activity||catalytic activity	catalytic activity	ligase activity
		AAEL001200	0	5.26763	Aspartyl-tRNA synthetase, mitochondrial OS=Bos taurus GN=DARS2 PE=2 SV=1	1e-155	0	aspartate\-tRNA ligase activity||aminoacyl\-tRNA ligase activity||ligase activity\, forming aminoacyl\-tRNA and related compounds||ligase activity\, forming carbon\-oxygen bonds||ligase activity||catalytic activity	catalytic activity	ligase activity
		AAEL001357	0	4.85935	E3 ubiquitin-protein ligase RNF168 OS=Xenopus tropicalis GN=rnf168 PE=2 SV=1	2e-24	2e-24	ligase activity||catalytic activity	catalytic activity	ligase activity
		AAEL002775	0	0.789121	Tubulin polyglutamylase TTLL6 OS=Mus musculus GN=Ttll6 PE=2 SV=1	9e-30	0	ligase activity||catalytic activity	catalytic activity	ligase activity
		AAEL004962	0	0.310048	P17/29C-like protein DDB_G0287399 OS=Dictyostelium discoideum GN=DDB_G0287399	0.0002	0.001	ubiquitin\-protein ligase activity||small conjugating protein ligase activity||acid\-amino acid ligase activity||ligase activity\, forming carbon\-nitrogen bonds||ligase activity||catalytic activity	catalytic activity	ligase activity
		AAEL005688	0	4.29549	Probable glutamyl-tRNA synthetase, mitochondrial OS=Xenopus tropicalis GN=ears2	1e-126	0	glutamate\-tRNA ligase activity||aminoacyl\-tRNA ligase activity||ligase activity\, forming aminoacyl\-tRNA and related compounds||ligase activity\, forming carbon\-oxygen bonds||ligase activity||catalytic activity	catalytic activity	ligase activity
		AAEL007227	0	0.526754	E3 ubiquitin-protein ligase RNF123 OS=Homo sapiens GN=RNF123 PE=1 SV=1	1e-165	0	ligase activity||catalytic activity	catalytic activity	ligase activity
		AAEL007875	0	0.69345	F-box/LRR-repeat protein 15 OS=Arabidopsis thaliana GN=FBL15 PE=1 SV=2	0.065	0.032	ubiquitin\-protein ligase activity||small conjugating protein ligase activity||acid\-amino acid ligase activity||ligase activity\, forming carbon\-nitrogen bonds||ligase activity||catalytic activity	catalytic activity	ligase activity
		AAEL007975	0	1.06753	F-box/WD repeat-containing protein A OS=Dictyostelium discoideum GN=fbxA PE=1	0.007	0.003	ubiquitin\-protein ligase activity||small conjugating protein ligase activity||acid\-amino acid ligase activity||ligase activity\, forming carbon\-nitrogen bonds||ligase activity||catalytic activity	catalytic activity	ligase activity
		AAEL010816	0	3.63659	Probable prolyl-tRNA synthetase, mitochondrial OS=Mus musculus GN=Pars2 PE=2	1e-104	0	proline\-tRNA ligase activity||aminoacyl\-tRNA ligase activity||ligase activity\, forming aminoacyl\-tRNA and related compounds||ligase activity\, forming carbon\-oxygen bonds||ligase activity||catalytic activity	catalytic activity	ligase activity
		AAEL012011	0	2.63571	NEDD8-conjugating enzyme UBE2F OS=Xenopus tropicalis GN=ube2f PE=2 SV=1	2e-65	2e-65	small conjugating protein ligase activity||acid\-amino acid ligase activity||ligase activity\, forming carbon\-nitrogen bonds||ligase activity||catalytic activity	catalytic activity	ligase activity
		AAEL012314	0	1.91737	Probable E3 ubiquitin-protein ligase HERC4 OS=Rattus norvegicus GN=Herc4 PE=2	5e-15	2e-24	ubiquitin\-protein ligase activity||small conjugating protein ligase activity||acid\-amino acid ligase activity||ligase activity\, forming carbon\-nitrogen bonds||ligase activity||catalytic activity	catalytic activity	ligase activity
		AAEL012431	0	2.33205	Probable 4-coumarate--CoA ligase 1 OS=Dictyostelium discoideum GN=4cl1 PE=3 SV=1	3e-57	1e-77	4\-coumarate\-CoA ligase activity||acid\-thiol ligase activity||ligase activity\, forming carbon\-sulfur bonds||ligase activity||catalytic activity	catalytic activity	ligase activity
		AAEL013469	0	1.50109	Valyl-tRNA synthetase OS=Mus musculus GN=Vars PE=2 SV=1	0	0	valine\-tRNA ligase activity||aminoacyl\-tRNA ligase activity||ligase activity\, forming aminoacyl\-tRNA and related compounds||ligase activity\, forming carbon\-oxygen bonds||ligase activity||catalytic activity	catalytic activity	ligase activity
		AAEL015231	0	0.159442	Ankyrin repeat domain-containing protein 50 OS=Homo sapiens GN=ANKRD50 PE=1 SV=4	5e-26	2e-25	ubiquitin\-protein ligase activity||small conjugating protein ligase activity||acid\-amino acid ligase activity||ligase activity\, forming carbon\-nitrogen bonds||ligase activity||catalytic activity	catalytic activity	ligase activity
		AAEL016974	0	3.55418	Alanyl-tRNA synthetase, cytoplasmic OS=Saccharomyces cerevisiae GN=ALA1 PE=1	5e-51	3e-61	alanine\-tRNA ligase activity||aminoacyl\-tRNA ligase activity||ligase activity\, forming aminoacyl\-tRNA and related compounds||ligase activity\, forming carbon\-oxygen bonds||ligase activity||catalytic activity	catalytic activity	ligase activity
		AAEL017336	0	0.23163	Luciferin 4-monooxygenase OS=Luciola cruciata PE=1 SV=1	4e-39	8e-39	4\-coumarate\-CoA ligase activity||acid\-thiol ligase activity||ligase activity\, forming carbon\-sulfur bonds||ligase activity||catalytic activity	catalytic activity	ligase activity
		AAEL001293	0	4.20807	Retinaldehyde-binding protein 1-like protein 1 OS=Pongo abelii GN=RLBP1L1 PE=2	4e-38	1e-95	retinal binding||retinoid binding||isoprenoid binding||lipid binding||binding	binding	lipid binding
		AAEL001483	0	0.241601	PCTP-like protein OS=Mus musculus GN=Stard10 PE=1 SV=1	2e-45	9e-46	lipid binding||binding	binding	lipid binding
		AAEL001793	0	1.18218	Microsomal triglyceride transfer protein large subunit (Fragment) OS=Bos taurus	2e-39	8e-56	triglyceride binding||lipid binding||binding	binding	lipid binding
		AAEL002357	0	0.869272	Protein unc-13 homolog A OS=Mus musculus GN=Unc13a PE=1 SV=2	0	0	diacylglycerol binding||lipid binding||binding	binding	lipid binding
		AAEL005350	0	0.847621	Retinaldehyde-binding protein 1-like protein 1 OS=Xenopus laevis GN=rlbp1l1 PE=2	3e-27	2e-60	retinal binding||retinoid binding||isoprenoid binding||lipid binding||binding	binding	lipid binding
		AAEL008001	0	0.368016	Retinaldehyde-binding protein 1-like protein 1 OS=Pongo abelii GN=RLBP1L1 PE=2	8e-27	1e-90	retinal binding||retinoid binding||isoprenoid binding||lipid binding||binding	binding	lipid binding
		AAEL008268	0	0.869346	Retinaldehyde-binding protein 1 OS=Mus musculus GN=Rlbp1 PE=2 SV=3	1e-20	8e-50	retinal binding||retinoid binding||isoprenoid binding||lipid binding||binding	binding	lipid binding
		AAEL010342	0	2.75394	Rac GTPase-activating protein 1 OS=Mus musculus GN=Racgap1 PE=2 SV=1	3e-84	0	diacylglycerol binding||lipid binding||binding	binding	lipid binding
		AAEL011448	0	1.31815	Retinaldehyde-binding protein 1-like protein 2 OS=Danio rerio GN=rlbp1l2 PE=2	4e-27	3e-68	retinal binding||retinoid binding||isoprenoid binding||lipid binding||binding	binding	lipid binding
		AAEL011449	0	0.0691567	Alpha-tocopherol transfer protein-like OS=Pongo abelii GN=TTPAL PE=2 SV=1	7e-23	2e-52	retinal binding||retinoid binding||isoprenoid binding||lipid binding||binding	binding	lipid binding
		AAEL011452	0	1.25209	Retinaldehyde-binding protein 1-like protein 2 OS=Danio rerio GN=rlbp1l2 PE=2	2e-25	8e-53	retinal binding||retinoid binding||isoprenoid binding||lipid binding||binding	binding	lipid binding
		AAEL011454	0	0.93111	Retinaldehyde-binding protein 1-like protein 2 OS=Danio rerio GN=rlbp1l2 PE=2	6e-21	4e-58	retinal binding||retinoid binding||isoprenoid binding||lipid binding||binding	binding	lipid binding
		AAEL011457	0	0.303517	Retinaldehyde-binding protein 1 OS=Mus musculus GN=Rlbp1 PE=2 SV=3	8e-21	2e-50	retinal binding||retinoid binding||isoprenoid binding||lipid binding||binding	binding	lipid binding
		AAEL011623	0	3.13759	Retinaldehyde-binding protein 1-like protein 1 OS=Xenopus laevis GN=rlbp1l1 PE=2	1e-25	5e-92	retinal binding||retinoid binding||isoprenoid binding||lipid binding||binding	binding	lipid binding
		AAEL014990	0	0.858211	Retinaldehyde-binding protein 1-like protein 2 OS=Danio rerio GN=rlbp1l2 PE=2	9e-22	1e-73	retinal binding||retinoid binding||isoprenoid binding||lipid binding||binding	binding	lipid binding
		AAEL001457	0	0.977483	Head-specific guanylate cyclase OS=Drosophila melanogaster GN=Gycalpha99B PE=2	0	0	guanylate cyclase activity||phosphorus\-oxygen lyase activity||lyase activity||catalytic activity	catalytic activity	lyase activity
		AAEL004050	0	2.60855	Diphosphomevalonate decarboxylase OS=Bos taurus GN=MVD PE=2 SV=1	1e-106	0	lyase activity||catalytic activity	catalytic activity	lyase activity
		AAEL007878	0	0.467577	Ornithine decarboxylase OS=Rattus norvegicus GN=Odc1 PE=1 SV=1	2e-92	1e-92	ornithine decarboxylase activity||carboxy\-lyase activity||carbon\-carbon lyase activity||lyase activity||catalytic activity	catalytic activity	lyase activity
		AAEL007887	0	0.664624	Ornithine decarboxylase (Fragment) OS=Gallus gallus GN=ODC1 PE=2 SV=1	1e-84	8e-86	ornithine decarboxylase activity||carboxy\-lyase activity||carbon\-carbon lyase activity||lyase activity||catalytic activity	catalytic activity	lyase activity
		AAEL008031	0	0.0406523	Carbonic anhydrase-related protein 10 OS=Bos taurus GN=CA10 PE=2 SV=1	1e-66	0	carbonate dehydratase activity||hydro\-lyase activity||carbon\-oxygen lyase activity||lyase activity||catalytic activity	catalytic activity	lyase activity
		AAEL008467	0	0.0671619	Cystathionine beta-synthase OS=Macaca fascicularis GN=CBS PE=2 SV=3	1e-150	0	cystathionine beta\-synthase activity||hydro\-lyase activity||carbon\-oxygen lyase activity||lyase activity||catalytic activity	catalytic activity	lyase activity
		AAEL012294	0	0.314148	Adenylate cyclase type 9 OS=Homo sapiens GN=ADCY9 PE=1 SV=4	1e-105	0	adenylate cyclase activity||phosphorus\-oxygen lyase activity||lyase activity||catalytic activity	catalytic activity	lyase activity
		AAEL015372	0	2.31595	Guanylate cyclase soluble subunit beta-1 OS=Homo sapiens GN=GUCY1B3 PE=1 SV=1	1e-138	0	guanylate cyclase activity||phosphorus\-oxygen lyase activity||lyase activity||catalytic activity	catalytic activity	lyase activity
		AAEL009228	0	3.89822	Adrenodoxin-like protein, mitochondrial OS=Drosophila melanogaster GN=Fdxh PE=2	3e-61	2e-61	2 iron\, 2 sulfur cluster binding||iron\-sulfur cluster binding||metal cluster binding||binding	binding	metal cluster binding
		AAEL000974,AAEL000980	0	6.34615	NOTFOUND	NOTFOUND	NOTFOUND	NOTFOUND	NOTFOUND	NOTFOUND
		AAEL002285,AAEL002316	0	3.82896	NOTFOUND	NOTFOUND	NOTFOUND	NOTFOUND	NOTFOUND	NOTFOUND
		AAEL002821,AAEL002830	0	1.01201	NOTFOUND	NOTFOUND	NOTFOUND	NOTFOUND	NOTFOUND	NOTFOUND
		AAEL003775,AAEL003793	0	1.24898	NOTFOUND	NOTFOUND	NOTFOUND	NOTFOUND	NOTFOUND	NOTFOUND
		AAEL004158,AAEL004194	0	0.278948	NOTFOUND	NOTFOUND	NOTFOUND	NOTFOUND	NOTFOUND	NOTFOUND
		AAEL012468,AAEL012470	0	0.977111	NOTFOUND	NOTFOUND	NOTFOUND	NOTFOUND	NOTFOUND	NOTFOUND
		AAEL015129,AAEL015130	0	1.68639	NOTFOUND	NOTFOUND	NOTFOUND	NOTFOUND	NOTFOUND	NOTFOUND
		AAEL000133	0	2.08955	UPF0182 protein RHA1_ro08670 OS=Rhodococcus sp. (strain RHA1) GN=RHA1_ro08670	0.12	3e-17	DNA binding||nucleic acid binding||binding	binding	nucleic acid binding
		AAEL000139	0	0.291121	Putative mediator of RNA polymerase II transcription subunit 26 OS=Dictyostelium	6e-05	6e-06	nucleic acid binding||binding	binding	nucleic acid binding
		AAEL000201	0	1.80837	DNA2-like helicase OS=Xenopus laevis GN=dna2 PE=1 SV=1	1e-139	0	DNA binding||nucleic acid binding||binding	binding	nucleic acid binding
		AAEL000236	0	0.247771	Forkhead box protein D3 OS=Mus musculus GN=Foxd3 PE=2 SV=3	4e-27	3e-58	transcription factor activity||DNA binding||nucleic acid binding||binding	binding	nucleic acid binding
		AAEL000303	0	2.59195	Histone H2A OS=Tigriopus californicus GN=His2A PE=3 SV=2	9e-40	4e-40	DNA binding||nucleic acid binding||binding	binding	nucleic acid binding
		AAEL000341	0	1.01246	Class E basic helix-loop-helix protein 23 OS=Homo sapiens GN=BHLHE23 PE=2 SV=1	1e-32	2e-61	transcription factor activity||DNA binding||nucleic acid binding||binding	binding	nucleic acid binding
		AAEL000435	0	8.16869	THO complex subunit 7 homolog OS=Danio rerio GN=thoc7 PE=2 SV=1	1e-43	5e-44	RNA binding||nucleic acid binding||binding	binding	nucleic acid binding
		AAEL000490	0	0.0873388	Histone H4 OS=Tigriopus californicus GN=His4 PE=3 SV=2	3e-53	1e-53	DNA binding||nucleic acid binding||binding	binding	nucleic acid binding
		AAEL000494	0	0.244803	Histone H2A OS=Tigriopus californicus GN=His2A PE=3 SV=2	7e-64	3e-64	DNA binding||nucleic acid binding||binding	binding	nucleic acid binding
		AAEL000497	0	0.244803	Histone H2A OS=Tigriopus californicus GN=His2A PE=3 SV=2	7e-64	3e-64	DNA binding||nucleic acid binding||binding	binding	nucleic acid binding
		AAEL000501	0	0.0873388	Histone H4 OS=Tigriopus californicus GN=His4 PE=3 SV=2	3e-53	1e-53	DNA binding||nucleic acid binding||binding	binding	nucleic acid binding
		AAEL000513	0	0.0873388	Histone H4 OS=Tigriopus californicus GN=His4 PE=3 SV=2	3e-53	1e-53	DNA binding||nucleic acid binding||binding	binding	nucleic acid binding
		AAEL000517	0	0.0873388	Histone H4 OS=Tigriopus californicus GN=His4 PE=3 SV=2	3e-53	1e-53	DNA binding||nucleic acid binding||binding	binding	nucleic acid binding
		AAEL000518	0	0.244803	Histone H2A OS=Tigriopus californicus GN=His2A PE=3 SV=2	7e-64	3e-64	DNA binding||nucleic acid binding||binding	binding	nucleic acid binding
		AAEL000525	0	0.244803	Histone H2A OS=Tigriopus californicus GN=His2A PE=3 SV=2	7e-64	3e-64	DNA binding||nucleic acid binding||binding	binding	nucleic acid binding
		AAEL000577	0	0.230904	Protein grainyhead OS=Drosophila melanogaster GN=grh PE=2 SV=3	0	0	DNA binding||nucleic acid binding||binding	binding	nucleic acid binding
		AAEL000584	0	1.15372	Transcription factor SOX-3 OS=Mus musculus GN=Sox3 PE=2 SV=1	4e-50	0	transcription factor activity||DNA binding||nucleic acid binding||binding	binding	nucleic acid binding
		AAEL000656	0	1.29368	Protein pangolin, isoforms A/H/I OS=Drosophila melanogaster GN=pan PE=1 SV=1	1e-162	2e-83	DNA binding||nucleic acid binding||binding	binding	nucleic acid binding
		AAEL000661	0	3.20865	Protein pangolin, isoforms A/H/I OS=Drosophila melanogaster GN=pan PE=1 SV=1	1e-105	2e-46	DNA binding||nucleic acid binding||binding	binding	nucleic acid binding
		AAEL000893	0	0.573006	SOX domain-containing protein dichaete OS=Drosophila melanogaster GN=D PE=2 SV=1	2e-84	8e-85	transcription factor activity||DNA binding||nucleic acid binding||binding	binding	nucleic acid binding
		AAEL000961	0	5.03656	Protein TSPEAR OS=Homo sapiens GN=TSPEAR PE=2 SV=2	0.0004	0.0003	transcription factor activity||DNA binding||nucleic acid binding||binding	binding	nucleic acid binding
		AAEL001055	0	0.299083	DNA-binding protein D-ETS-3 OS=Drosophila melanogaster GN=Ets65A PE=2 SV=3	2e-35	1e-35	transcription factor activity||DNA binding||nucleic acid binding||binding	binding	nucleic acid binding
		AAEL001739	0	1.19627	Protein bric-a-brac 2 OS=Drosophila melanogaster GN=bab2 PE=1 SV=2	3e-63	1e-63	transcription factor activity||DNA binding||nucleic acid binding||binding	binding	nucleic acid binding
		AAEL001893	0	0.414159	Zinc finger protein 235 OS=Homo sapiens GN=ZNF235 PE=2 SV=3	7e-48	5e-50	nucleic acid binding||binding	binding	nucleic acid binding
		AAEL002060	0	1.60942	B box-binding protein OS=Xenopus laevis PE=2 SV=1	3e-23	1e-22	DNA binding||nucleic acid binding||binding	binding	nucleic acid binding
		AAEL002093	0	0.331135	Dentin sialophosphoprotein OS=Homo sapiens GN=DSPP PE=1 SV=2	4e-16	4e-14	transcription factor activity||DNA binding||nucleic acid binding||binding	binding	nucleic acid binding
		AAEL002103	0	0.557997	Histone H1C OS=Chironomus tentans PE=3 SV=1	2e-07	2e-08	DNA binding||nucleic acid binding||binding	binding	nucleic acid binding
		AAEL002120	0	0.384321	Zinc finger protein 84 OS=Homo sapiens GN=ZNF84 PE=2 SV=2	2e-95	2e-94	nucleic acid binding||binding	binding	nucleic acid binding
		AAEL002321	0	0.572053	Paired box protein Pax	9e-96	2e-95	transcription factor activity||DNA binding||nucleic acid binding||binding	binding	nucleic acid binding
		AAEL002338	0	0.238	La-related protein 6 OS=Homo sapiens GN=LARP6 PE=1 SV=1	2e-36	2e-35	RNA binding||nucleic acid binding||binding	binding	nucleic acid binding
		AAEL002402	0	2.05635	GATA zinc finger domain-containing protein 3 OS=Dictyostelium discoideum GN=gtaC	1e-05	6e-06	transcription factor activity||DNA binding||nucleic acid binding||binding	binding	nucleic acid binding
		AAEL002422	0	10.1949	Cytoplasmic polyadenylation element-binding protein 1-B OS=Xenopus laevis	1e-100	0	uridine\-rich cytoplasmic polyadenylylation element binding||poly\-pyrimidine tract binding||single\-stranded RNA binding||RNA binding||nucleic acid binding||binding	binding	nucleic acid binding
		AAEL002423	0	0.521741	Heart- and neural crest derivatives-expressed protein 2 OS=Danio rerio GN=hand2	2e-29	3e-33	transcription factor activity||DNA binding||nucleic acid binding||binding	binding	nucleic acid binding
		AAEL002451	0	2.26541	Zinc finger protein 1 OS=Drosophila melanogaster GN=zfh1 PE=1 SV=2	1e-166	0	DNA binding||nucleic acid binding||binding	binding	nucleic acid binding
		AAEL002586	0	3.02528	Myb-like protein Q OS=Dictyostelium discoideum GN=mybQ PE=3 SV=1	1e-07	6e-08	DNA binding||nucleic acid binding||binding	binding	nucleic acid binding
		AAEL002740	0	0.464585	Homeotic protein ocelliless OS=Drosophila melanogaster GN=oc PE=2 SV=2	5e-90	2e-90	transcription factor activity||DNA binding||nucleic acid binding||binding	binding	nucleic acid binding
		AAEL002763	0	1.189	Zinc finger protein rotund OS=Drosophila melanogaster GN=rn PE=1 SV=2	1e-156	0	transcription factor activity||DNA binding||nucleic acid binding||binding	binding	nucleic acid binding
		AAEL002975	0	1.04116	Zinc finger and SCAN domain-containing protein 29 OS=Homo sapiens GN=ZSCAN29	0.0008	3e-06	transcription factor activity||DNA binding||nucleic acid binding||binding	binding	nucleic acid binding
		AAEL002980	0	4.96182	U1 small nuclear ribonucleoprotein A OS=Drosophila melanogaster GN=snf PE=1 SV=1	4e-97	2e-97	mRNA binding||RNA binding||nucleic acid binding||binding	binding	nucleic acid binding
		AAEL003074	0	0.29272	DNA-binding protein D-ETS-3 OS=Drosophila melanogaster GN=Ets65A PE=2 SV=3	6e-36	3e-36	transcription factor activity||DNA binding||nucleic acid binding||binding	binding	nucleic acid binding
		AAEL003124	0	1.00846	HIV Tat-specific factor 1 OS=Homo sapiens GN=HTATSF1 PE=1 SV=1	1e-34	5e-75	RNA binding||nucleic acid binding||binding	binding	nucleic acid binding
		AAEL003159	0	0.242291	THAP domain-containing protein 5 OS=Macaca fascicularis GN=THAP5 PE=2 SV=1	0.0001	3e-07	nucleic acid binding||binding	binding	nucleic acid binding
		AAEL003178	0	0.118577	GDNF-inducible zinc finger protein 1 OS=Homo sapiens GN=GZF1 PE=2 SV=1	3e-29	4e-29	nucleic acid binding||binding	binding	nucleic acid binding
		AAEL003302	0	17.6194	L antigen family member 3 OS=Homo sapiens GN=LAGE3 PE=1 SV=2	2e-08	8e-09	chromatin DNA binding||structure\-specific DNA binding||DNA binding||nucleic acid binding||binding	binding	nucleic acid binding
		AAEL003342	0	0.387898	Zinc finger protein 423 OS=Homo sapiens GN=ZNF423 PE=1 SV=1	0.33	0.0002	DNA binding||nucleic acid binding||binding	binding	nucleic acid binding
		AAEL003407	0	5.36034	RNA-binding protein 38 OS=Homo sapiens GN=RBM38 PE=1 SV=2	4e-40	5e-40	mRNA 3'\-UTR binding||mRNA binding||RNA binding||nucleic acid binding||binding	binding	nucleic acid binding
		AAEL003668	0	0.361204	Zinc finger protein 182 OS=Homo sapiens GN=ZNF182 PE=1 SV=2	6e-48	9e-48	nucleic acid binding||binding	binding	nucleic acid binding
		AAEL003669	0	28.9444	Histone H2A OS=Tigriopus californicus GN=His2A PE=3 SV=2	2e-61	1e-61	DNA binding||nucleic acid binding||binding	binding	nucleic acid binding
		AAEL003672	0	0.144444	Zinc finger protein 182 OS=Homo sapiens GN=ZNF182 PE=1 SV=2	7e-48	9e-48	nucleic acid binding||binding	binding	nucleic acid binding
		AAEL003673	0	45.1171	Histone H4 OS=Tigriopus californicus GN=His4 PE=3 SV=2	3e-53	1e-53	DNA binding||nucleic acid binding||binding	binding	nucleic acid binding
		AAEL003687	0	4.582	Histone H2A OS=Tigriopus californicus GN=His2A PE=3 SV=2	2e-59	1e-59	DNA binding||nucleic acid binding||binding	binding	nucleic acid binding
		AAEL003689	0	24.8039	Histone H4 OS=Tigriopus californicus GN=His4 PE=3 SV=2	3e-53	1e-53	DNA binding||nucleic acid binding||binding	binding	nucleic acid binding
		AAEL003706	0	3.55709	Histone H2A OS=Tigriopus californicus GN=His2A PE=3 SV=2	2e-59	1e-59	DNA binding||nucleic acid binding||binding	binding	nucleic acid binding
		AAEL003814	0	0.0873388	Histone H4 OS=Tigriopus californicus GN=His4 PE=3 SV=2	3e-53	1e-53	DNA binding||nucleic acid binding||binding	binding	nucleic acid binding
		AAEL003818	0	2.79224	Histone H2A OS=Tigriopus californicus GN=His2A PE=3 SV=2	7e-64	3e-64	DNA binding||nucleic acid binding||binding	binding	nucleic acid binding
		AAEL003820	0	4.04988	Histone H2A OS=Tigriopus californicus GN=His2A PE=3 SV=2	6e-63	2e-63	DNA binding||nucleic acid binding||binding	binding	nucleic acid binding
		AAEL003823	0	0.0811415	Histone H4 OS=Tigriopus californicus GN=His4 PE=3 SV=2	3e-53	1e-53	DNA binding||nucleic acid binding||binding	binding	nucleic acid binding
		AAEL003826	0	2.79224	Histone H2A OS=Tigriopus californicus GN=His2A PE=3 SV=2	7e-64	3e-64	DNA binding||nucleic acid binding||binding	binding	nucleic acid binding
		AAEL003827	0	0.0649334	Histone H3 OS=Urechis caupo PE=1 SV=2	4e-68	2e-68	DNA binding||nucleic acid binding||binding	binding	nucleic acid binding
		AAEL003828	0	0.0641277	Histone H3 OS=Urechis caupo PE=1 SV=2	1e-70	5e-71	DNA binding||nucleic acid binding||binding	binding	nucleic acid binding
		AAEL003833	0	0.0825031	Histone H4 OS=Tigriopus californicus GN=His4 PE=3 SV=2	2e-52	7e-53	DNA binding||nucleic acid binding||binding	binding	nucleic acid binding
		AAEL003836	0	0.0641277	Histone H3 OS=Urechis caupo PE=1 SV=2	1e-70	5e-71	DNA binding||nucleic acid binding||binding	binding	nucleic acid binding
		AAEL003838	0	0.0811415	Histone H4 OS=Tigriopus californicus GN=His4 PE=3 SV=2	3e-53	1e-53	DNA binding||nucleic acid binding||binding	binding	nucleic acid binding
		AAEL003846	0	0.0811415	Histone H4 OS=Tigriopus californicus GN=His4 PE=3 SV=2	3e-53	1e-53	DNA binding||nucleic acid binding||binding	binding	nucleic acid binding
		AAEL003850	0	0.0641277	Histone H3 OS=Urechis caupo PE=1 SV=2	1e-70	5e-71	DNA binding||nucleic acid binding||binding	binding	nucleic acid binding
		AAEL003851	0	2.79224	Histone H2A OS=Tigriopus californicus GN=His2A PE=3 SV=2	7e-64	3e-64	DNA binding||nucleic acid binding||binding	binding	nucleic acid binding
		AAEL003852	0	0.0641277	Histone H3 OS=Urechis caupo PE=1 SV=2	1e-70	5e-71	DNA binding||nucleic acid binding||binding	binding	nucleic acid binding
		AAEL003856	0	0.0641277	Histone H3 OS=Urechis caupo PE=1 SV=2	1e-70	5e-71	DNA binding||nucleic acid binding||binding	binding	nucleic acid binding
		AAEL003861	0	1.46773	Broad-complex core protein isoform 6 OS=Drosophila melanogaster GN=br PE=1 SV=2	1e-27	3e-56	transcription factor activity||DNA binding||nucleic acid binding||binding	binding	nucleic acid binding
		AAEL003862	0	4.04719	Histone H2A OS=Tigriopus californicus GN=His2A PE=3 SV=2	7e-64	3e-64	DNA binding||nucleic acid binding||binding	binding	nucleic acid binding
		AAEL003863	0	0.0825031	Histone H4 OS=Tigriopus californicus GN=His4 PE=3 SV=2	2e-52	7e-53	DNA binding||nucleic acid binding||binding	binding	nucleic acid binding
		AAEL003866	0	0.0811415	Histone H4 OS=Tigriopus californicus GN=His4 PE=3 SV=2	3e-53	1e-53	DNA binding||nucleic acid binding||binding	binding	nucleic acid binding
		AAEL004026	0	2.3513	Zinc finger protein 28 OS=Homo sapiens GN=ZNF28 PE=2 SV=4	3e-45	2e-45	nucleic acid binding||binding	binding	nucleic acid binding
		AAEL004093	0	1.06589	Uncharacterized membrane protein DDB_G0293934 OS=Dictyostelium discoideum	8e-11	5e-13	DNA binding||nucleic acid binding||binding	binding	nucleic acid binding
		AAEL004094	0	0.865913	POU domain, class 6, transcription factor 2 OS=Mus musculus GN=Pou6f2 PE=2 SV=1	2e-50	2e-82	transcription factor activity||DNA binding||nucleic acid binding||binding	binding	nucleic acid binding
		AAEL004106	0	1.33385	Protein deadpan OS=Drosophila melanogaster GN=dpn PE=1 SV=2	1e-47	7e-48	DNA binding||nucleic acid binding||binding	binding	nucleic acid binding
		AAEL004159	0	0.606567	T-box transcription factor TBX6 OS=Homo sapiens GN=TBX6 PE=2 SV=2	2e-40	5e-64	transcription factor activity||DNA binding||nucleic acid binding||binding	binding	nucleic acid binding
		AAEL004170	0	3.22042	Zinc finger protein 43 OS=Homo sapiens GN=ZNF43 PE=2 SV=4	1e-28	6e-30	nucleic acid binding||binding	binding	nucleic acid binding
		AAEL004377	0	1.16879	snRNA-activating protein complex subunit 4 OS=Homo sapiens GN=SNAPC4 PE=1 SV=1	4e-34	2e-66	DNA binding||nucleic acid binding||binding	binding	nucleic acid binding
		AAEL004432	0	3.52465	Visual system homeobox 2 OS=Oryzias latipes GN=vsx2 PE=2 SV=1	4e-19	5e-26	transcription factor activity||DNA binding||nucleic acid binding||binding	binding	nucleic acid binding
		AAEL004468	0	2.90568	Arginine-glutamic acid dipeptide repeats protein OS=Rattus norvegicus GN=Rere	3e-07	1e-07	transcription factor activity||DNA binding||nucleic acid binding||binding	binding	nucleic acid binding
		AAEL004799	0	5.17243	Zinc finger protein rotund OS=Drosophila melanogaster GN=rn PE=1 SV=2	1e-131	0	transcription factor activity||DNA binding||nucleic acid binding||binding	binding	nucleic acid binding
		AAEL004806	0	0.733646	Krueppel-like factor 12 OS=Homo sapiens GN=KLF12 PE=2 SV=2	4e-42	6e-48	transcription factor activity||DNA binding||nucleic acid binding||binding	binding	nucleic acid binding
		AAEL004894	0	0.893112	Serine/arginine repetitive matrix protein 1 OS=Gallus gallus GN=SRRM1 PE=2 SV=1	0.001	0.005	RNA binding||nucleic acid binding||binding	binding	nucleic acid binding
		AAEL005028	0	0.941608	Zinc finger protein 574 OS=Xenopus tropicalis GN=znf574 PE=2 SV=1	3e-06	6e-08	nucleic acid binding||binding	binding	nucleic acid binding
		AAEL005031	0	0.343854	Zinc finger protein 658B OS=Homo sapiens GN=ZNF658B PE=2 SV=1	1e-40	5e-43	nucleic acid binding||binding	binding	nucleic acid binding
		AAEL005042	0	3.63969	Zinc finger protein 337 OS=Homo sapiens GN=ZNF337 PE=2 SV=2	0.0001	1e-05	nucleic acid binding||binding	binding	nucleic acid binding
		AAEL005049	0	3.50245	RNA-binding protein squid OS=Drosophila melanogaster GN=sqd PE=1 SV=3	1e-102	0	mRNA 3'\-UTR binding||mRNA binding||RNA binding||nucleic acid binding||binding	binding	nucleic acid binding
		AAEL005110	0	5.08828	DNA repair protein XRCC2 OS=Homo sapiens GN=XRCC2 PE=1 SV=1	4e-16	4e-15	DNA binding||nucleic acid binding||binding	binding	nucleic acid binding
		AAEL005309	0	4.80011	High mobility group protein 20A OS=Homo sapiens GN=HMG20A PE=1 SV=1	3e-50	2e-50	DNA binding||nucleic acid binding||binding	binding	nucleic acid binding
		AAEL005445	0	0.166272	Elongation factor 1-gamma OS=Prunus avium PE=2 SV=1	0.025	0.027	RNA binding||nucleic acid binding||binding	binding	nucleic acid binding
		AAEL005549	0	1.00593	HIV Tat-specific factor 1 OS=Homo sapiens GN=HTATSF1 PE=1 SV=1	1e-34	2e-74	RNA binding||nucleic acid binding||binding	binding	nucleic acid binding
		AAEL005717	0	4.36291	Protein suppressor of hairy wing OS=Drosophila ananassae GN=su(Hw) PE=2 SV=1	8e-14	1e-14	nucleic acid binding||binding	binding	nucleic acid binding
		AAEL005720	0	0.254608	Leucine-rich repeat and WD repeat-containing protein KIAA1239 OS=Homo sapiens	1e-133	0	RNA binding||nucleic acid binding||binding	binding	nucleic acid binding
		AAEL005773	0	0.341971	Doublesex- and mab-3-related transcription factor A2 OS=Xenopus tropicalis	2e-10	2e-64	transcription factor activity||DNA binding||nucleic acid binding||binding	binding	nucleic acid binding
		AAEL005858	0	0.286714	DNA mismatch repair protein Mlh1 OS=Homo sapiens GN=MLH1 PE=1 SV=1	0	0	mismatched DNA binding||double\-stranded DNA binding||structure\-specific DNA binding||DNA binding||nucleic acid binding||binding	binding	nucleic acid binding
		AAEL005936	0	11.4048	cAMP-dependent protein kinase inhibitor beta OS=Homo sapiens GN=PKIB PE=2 SV=1	0.001	1e-06	transcription factor activity||DNA binding||nucleic acid binding||binding	binding	nucleic acid binding
		AAEL005974	0	1.28514	Homeobox protein DBX1 OS=Homo sapiens GN=DBX1 PE=2 SV=2	8e-47	3e-86	transcription factor activity||DNA binding||nucleic acid binding||binding	binding	nucleic acid binding
		AAEL006052	0	0.406096	THAP domain-containing protein 1 OS=Salmo salar GN=thap1 PE=2 SV=1	0.36	0.0008	nucleic acid binding||binding	binding	nucleic acid binding
		AAEL006237	0	1.39342	Trigger factor OS=Thermus thermophilus (strain HB27 / ATCC BAA-163 / DSM 7039)	0.97	5e-08	nucleic acid binding||binding	binding	nucleic acid binding
		AAEL006298	0	1.88057	Transforming growth factor beta regulator 1 OS=Homo sapiens GN=TBRG1 PE=1 SV=1	7e-56	3e-55	DNA binding||nucleic acid binding||binding	binding	nucleic acid binding
		AAEL006533	0	0.976688	DNA-binding protein D-ETS-6 OS=Drosophila melanogaster GN=Ets21C PE=2 SV=2	1e-84	5e-85	transcription factor activity||DNA binding||nucleic acid binding||binding	binding	nucleic acid binding
		AAEL006593	0	0.571012	Muscle segmentation homeobox OS=Drosophila melanogaster GN=Dr PE=2 SV=2	9e-51	4e-51	transcription factor activity||DNA binding||nucleic acid binding||binding	binding	nucleic acid binding
		AAEL006618	0	0.986568	Zinc finger protein 84 OS=Homo sapiens GN=ZNF84 PE=2 SV=2	2e-38	1e-39	nucleic acid binding||binding	binding	nucleic acid binding
		AAEL006645	0	15.2453	Heterogeneous nuclear ribonucleoprotein A/B OS=Mus musculus GN=Hnrnpab PE=1 SV=1	2e-11	2e-23	RNA binding||nucleic acid binding||binding	binding	nucleic acid binding
		AAEL006710	0	2.45243	Nucleolysin TIAR OS=Homo sapiens GN=TIAL1 PE=1 SV=1	2e-85	0	poly(A) RNA binding||poly\-purine tract binding||single\-stranded RNA binding||RNA binding||nucleic acid binding||binding	binding	nucleic acid binding
		AAEL006737	0	0.179179	Translation initiation factor IF-2 OS=Streptomyces coelicolor GN=infB PE=3 SV=1	2e-07	0	DNA binding||nucleic acid binding||binding	binding	nucleic acid binding
		AAEL006750	0	2.57546	Autophagy-related protein 11 OS=Vanderwaltozyma polyspora (strain ATCC 22028 /	2e-08	3e-08	DNA binding||nucleic acid binding||binding	binding	nucleic acid binding
		AAEL006765	0	0.125039	Serine/arginine repetitive matrix protein 2 OS=Mus musculus GN=Srrm2 PE=1 SV=2	1e-06	2e-07	nucleic acid binding||binding	binding	nucleic acid binding
		AAEL007005	0	0.254212	Histone H2A OS=Tigriopus californicus GN=His2A PE=3 SV=2	7e-64	3e-64	DNA binding||nucleic acid binding||binding	binding	nucleic acid binding
		AAEL007013	0	2.87693	Polyadenylate-binding protein 2 OS=Arabidopsis thaliana GN=PAB2 PE=1 SV=1	4e-21	2e-21	poly(A) RNA binding||poly\-purine tract binding||single\-stranded RNA binding||RNA binding||nucleic acid binding||binding	binding	nucleic acid binding
		AAEL007120	0	0.0408775	LIM/homeobox protein Lhx3 OS=Mus musculus GN=Lhx3 PE=1 SV=1	1e-102	0	transcription factor activity||DNA binding||nucleic acid binding||binding	binding	nucleic acid binding
		AAEL007133	0	0.763341	Adenomatous polyposis coli homolog OS=Xenopus laevis GN=apc PE=2 SV=2	0.063	5e-08	DNA binding||nucleic acid binding||binding	binding	nucleic acid binding
		AAEL007152	0	0.525836	snRNA-activating protein complex subunit 4 OS=Homo sapiens GN=SNAPC4 PE=1 SV=1	2e-30	8e-63	DNA binding||nucleic acid binding||binding	binding	nucleic acid binding
		AAEL007233	0	0.287811	Fez family zinc finger protein 2 OS=Xenopus laevis GN=fezf2 PE=2 SV=1	1e-98	0	nucleic acid binding||binding	binding	nucleic acid binding
		AAEL007329	0	5.34199	Protein held out wings OS=Drosophila melanogaster GN=how PE=1 SV=1	1e-125	0	mRNA binding||RNA binding||nucleic acid binding||binding	binding	nucleic acid binding
		AAEL007474	0	3.72785	Geminin OS=Mus musculus GN=Gmnn PE=1 SV=1	7e-07	1e-20	DNA binding||nucleic acid binding||binding	binding	nucleic acid binding
		AAEL007627	0	0.626697	Mucin-5AC (Fragments) OS=Homo sapiens GN=MUC5AC PE=1 SV=3	5e-06	2e-17	nucleic acid binding||binding	binding	nucleic acid binding
		AAEL007783	0	1.054	Histone H3 OS=Euplotes crassus PE=3 SV=3	7e-15	3e-15	DNA binding||nucleic acid binding||binding	binding	nucleic acid binding
		AAEL007814	0	1.7077	Helix-loop-helix protein 13 OS=Caenorhabditis elegans GN=hlh-13 PE=2 SV=1	6e-24	9e-74	transcription factor activity||DNA binding||nucleic acid binding||binding	binding	nucleic acid binding
		AAEL007829	0	0.758152	Hybrid signal transduction histidine kinase M OS=Dictyostelium discoideum	1e-11	6e-13	nucleic acid binding||binding	binding	nucleic acid binding
		AAEL007970	0	0.107085	Zinc finger protein 782 OS=Homo sapiens GN=ZNF782 PE=2 SV=1	3e-12	7e-15	nucleic acid binding||binding	binding	nucleic acid binding
		AAEL007981	0	13.4496	PR domain zinc finger protein 15 OS=Homo sapiens GN=PRDM15 PE=2 SV=4	2e-27	7e-26	nucleic acid binding||binding	binding	nucleic acid binding
		AAEL008026	0	0.0743691	Transcription factor Adf-1 OS=Drosophila melanogaster GN=Adf1 PE=1 SV=2	6e-07	4e-12	DNA binding||nucleic acid binding||binding	binding	nucleic acid binding
		AAEL008066	0	0.180259	Troponin T OS=Periplaneta americana GN=TNT PE=2 SV=1	4e-06	3e-15	DNA binding||nucleic acid binding||binding	binding	nucleic acid binding
		AAEL008326	0	0.269992	Paired box protein Pax-6 OS=Oryzias latipes GN=pax6 PE=2 SV=1	3e-08	3e-23	transcription factor activity||DNA binding||nucleic acid binding||binding	binding	nucleic acid binding
		AAEL008385	0	3.51121	Histone H2A OS=Tigriopus californicus GN=His2A PE=3 SV=2	1e-45	6e-46	DNA binding||nucleic acid binding||binding	binding	nucleic acid binding
		AAEL008435	0	3.01697	Zinc finger protein 43 OS=Homo sapiens GN=ZNF43 PE=2 SV=4	7e-29	1e-28	nucleic acid binding||binding	binding	nucleic acid binding
		AAEL008595	0	6.99284	Protein maelstrom homolog OS=Aedes aegypti GN=mael PE=3 SV=1	0	2e-34	DNA binding||nucleic acid binding||binding	binding	nucleic acid binding
		AAEL008602	0	0.128382	Zinc finger protein 600 OS=Homo sapiens GN=ZNF600 PE=1 SV=1	8e-35	8e-36	transcription factor activity||DNA binding||nucleic acid binding||binding	binding	nucleic acid binding
		AAEL008660	0	0.466108	Pancreas transcription factor 1 subunit alpha OS=Danio rerio GN=ptf1a PE=2 SV=1	1e-27	5e-66	transcription factor activity||DNA binding||nucleic acid binding||binding	binding	nucleic acid binding
		AAEL008704	0	3.54853	GATA zinc finger domain-containing protein 7 OS=Dictyostelium discoideum GN=gtaG	0.0004	0.0002	DNA binding||nucleic acid binding||binding	binding	nucleic acid binding
		AAEL008772	0	2.59914	Zinc finger protein 521 OS=Mus musculus GN=Znf521 PE=2 SV=2	0.007	0.002	transcription factor activity||DNA binding||nucleic acid binding||binding	binding	nucleic acid binding
		AAEL008839	0	0.646843	Zinc finger protein 28 OS=Homo sapiens GN=ZNF28 PE=2 SV=4	2e-42	4e-42	nucleic acid binding||binding	binding	nucleic acid binding
		AAEL008865	0	0.639998	Oligoribonuclease, mitochondrial OS=Homo sapiens GN=REXO2 PE=1 SV=3	3e-55	3e-55	nucleic acid binding||binding	binding	nucleic acid binding
		AAEL009060	0	3.6723	3-oxoacyl-	0.32	0.015	RNA binding||nucleic acid binding||binding	binding	nucleic acid binding
		AAEL009083	0	0.461865	Zinc finger protein Xfin OS=Xenopus laevis GN=xfin PE=1 SV=1	6e-24	4e-23	nucleic acid binding||binding	binding	nucleic acid binding
		AAEL009087	0	0.350963	Zinc finger protein 778 OS=Homo sapiens GN=ZNF778 PE=2 SV=2	4e-05	0.0003	nucleic acid binding||binding	binding	nucleic acid binding
		AAEL009182	0	0.407947	Zinc finger protein 816A OS=Homo sapiens GN=ZNF816A PE=2 SV=1	2e-33	1e-43	nucleic acid binding||binding	binding	nucleic acid binding
		AAEL009187	0	1.21893	PR domain zinc finger protein 5 OS=Homo sapiens GN=PRDM5 PE=1 SV=2	7e-32	2e-31	nucleic acid binding||binding	binding	nucleic acid binding
		AAEL009296	0	0.951553	Histone H3 OS=Euplotes crassus PE=3 SV=3	6e-18	7e-18	centromeric DNA binding||sequence\-specific DNA binding||DNA binding||nucleic acid binding||binding	binding	nucleic acid binding
		AAEL009438	0	0.811609	Probable ATP-dependent RNA helicase DDX11 OS=Mus musculus GN=Ddx11 PE=2 SV=1	1e-165	0	nucleic acid binding||binding	binding	nucleic acid binding
		AAEL009488	0	1.43667	Uncharacterized protein C8orf45 homolog OS=Rattus norvegicus PE=2 SV=1	0.2	8e-17	DNA binding||nucleic acid binding||binding	binding	nucleic acid binding
		AAEL009654	0	3.5688	Myb-like protein I OS=Dictyostelium discoideum GN=mybI PE=3 SV=1	1e-06	7e-08	DNA binding||nucleic acid binding||binding	binding	nucleic acid binding
		AAEL009663	0	0.382578	Zinc finger CCHC domain-containing protein 24 OS=Homo sapiens GN=ZCCHC24 PE=1	4e-65	1e-65	nucleic acid binding||binding	binding	nucleic acid binding
		AAEL009918	0	4.78466	Zinc finger and BTB domain-containing protein 16 OS=Homo sapiens GN=ZBTB16 PE=1	5e-13	2e-13	nucleic acid binding||binding	binding	nucleic acid binding
		AAEL009973	0	5.48818	HAT1-interacting factor 1 OS=Saccharomyces cerevisiae GN=HIF1 PE=1 SV=1	0.47	0.061	nucleic acid binding||binding	binding	nucleic acid binding
		AAEL009987	0	0.73708	Tudor domain-containing protein 1 OS=Homo sapiens GN=TDRD1 PE=1 SV=2	6e-10	7e-26	nucleic acid binding||binding	binding	nucleic acid binding
		AAEL010080	0	3.94123	Origin recognition complex subunit 1 OS=Drosophila melanogaster GN=Orc1 PE=1	0	0	DNA binding||nucleic acid binding||binding	binding	nucleic acid binding
		AAEL010086	0	2.52541	DNA replication licensing factor MCM4 OS=Drosophila melanogaster GN=dpa PE=1	0	0	DNA binding||nucleic acid binding||binding	binding	nucleic acid binding
		AAEL010092	0	0.548958	Serine/arginine repetitive matrix protein 1 OS=Mus musculus GN=Srrm1 PE=1 SV=1	0.039	0.02	DNA binding||nucleic acid binding||binding	binding	nucleic acid binding
		AAEL010180	0	4.93226	Structural maintenance of chromosomes protein 4 OS=Dictyostelium discoideum	0.001	0.0002	RNA binding||nucleic acid binding||binding	binding	nucleic acid binding
		AAEL010240	0	1.06619	Histone H1oo OS=Bos taurus GN=H1FOO PE=1 SV=1	0.002	0.002	DNA binding||nucleic acid binding||binding	binding	nucleic acid binding
		AAEL010298	0	0.363541	Homeotic protein ultrabithorax (Fragment) OS=Drosophila funebris GN=Ubx PE=3	2e-61	5e-60	DNA binding||nucleic acid binding||binding	binding	nucleic acid binding
		AAEL010482	0	2.27629	Eukaryotic translation initiation factor 4 gamma OS=Dictyostelium discoideum	3e-11	1e-11	RNA binding||nucleic acid binding||binding	binding	nucleic acid binding
		AAEL010578	0	0.0941828	Histone-lysine N-methyltransferase trithorax OS=Drosophila virilis GN=trx PE=3	2e-85	8e-85	DNA binding||nucleic acid binding||binding	binding	nucleic acid binding
		AAEL010637	0	6.92037	Zinc finger protein 782 OS=Homo sapiens GN=ZNF782 PE=2 SV=1	2e-49	4e-46	nucleic acid binding||binding	binding	nucleic acid binding
		AAEL010638	0	4.14307	Histone H1-gamma, late OS=Strongylocentrotus purpuratus PE=3 SV=1	8e-15	9e-12	DNA binding||nucleic acid binding||binding	binding	nucleic acid binding
		AAEL010646	0	2.63899	Protein dead ringer OS=Drosophila melanogaster GN=retn PE=1 SV=2	4e-31	2e-31	DNA binding||nucleic acid binding||binding	binding	nucleic acid binding
		AAEL010649	0	3.46187	Protein DEK OS=Mus musculus GN=Dek PE=1 SV=1	0.007	0.003	DNA binding||nucleic acid binding||binding	binding	nucleic acid binding
		AAEL010744	0	0.0408072	LIM/homeobox protein Lhx3 OS=Mus musculus GN=Lhx3 PE=1 SV=1	1e-102	0	transcription factor activity||DNA binding||nucleic acid binding||binding	binding	nucleic acid binding
		AAEL010786	0	0.534083	S-adenosyl-L-methionine-dependent methyltransferase ftsjd2 OS=Danio rerio	1e-75	1e-82	nucleic acid binding||binding	binding	nucleic acid binding
		AAEL010904	0	1.27069	ATP-dependent DNA helicase Q4 OS=Mus musculus GN=Recql4 PE=2 SV=2	1e-176	0	bubble DNA binding||DNA secondary structure binding||structure\-specific DNA binding||DNA binding||nucleic acid binding||binding	binding	nucleic acid binding
		AAEL011053	0	2.01977	Zinc finger protein 337 OS=Homo sapiens GN=ZNF337 PE=2 SV=2	1e-30	2e-33	nucleic acid binding||binding	binding	nucleic acid binding
		AAEL011233	0	10.7501	Probable small nuclear ribonucleoprotein E OS=Drosophila melanogaster GN=CG18591	5e-36	2e-36	RNA binding||nucleic acid binding||binding	binding	nucleic acid binding
		AAEL011358	0	2.60094	Origin recognition complex subunit 5 OS=Drosophila melanogaster GN=Orc5 PE=2	1e-132	0	DNA binding||nucleic acid binding||binding	binding	nucleic acid binding
		AAEL011359	0	1.31719	Nuclear factor of activated T-cells 5 OS=Mus musculus GN=Nfat5 PE=2 SV=1	1e-74	0	transcription factor activity||DNA binding||nucleic acid binding||binding	binding	nucleic acid binding
		AAEL011424	0	13.1621	Histone H3.3 OS=Xenopus tropicalis GN=TGas113e22.1 PE=1 SV=3	1e-69	7e-70	DNA binding||nucleic acid binding||binding	binding	nucleic acid binding
		AAEL011427	0	0.500907	Zinc finger protein 595 OS=Homo sapiens GN=ZNF595 PE=2 SV=1	3e-44	1e-64	DNA binding||nucleic acid binding||binding	binding	nucleic acid binding
		AAEL011533	0	6.88433	RNA-binding protein 12 OS=Pongo abelii GN=RBM12 PE=2 SV=1	4e-13	3e-19	mRNA binding||RNA binding||nucleic acid binding||binding	binding	nucleic acid binding
		AAEL011589	0	0.173938	Tax1-binding protein 1 homolog B OS=Danio rerio GN=tax1bp1b PE=2 SV=3	0.018	0.009	nucleic acid binding||binding	binding	nucleic acid binding
		AAEL011603	0	4.19811	DNA topoisomerase 3-beta OS=Drosophila melanogaster GN=Top3beta PE=2 SV=2	0	0	DNA topoisomerase type I activity||DNA topoisomerase activity||DNA binding||nucleic acid binding||binding	binding	nucleic acid binding
		AAEL011740	0	4.11581	Lysostaphin resistance protein A OS=Staphylococcus epidermidis (strain ATCC	0.44	0.056	sequence\-specific DNA binding||DNA binding||nucleic acid binding||binding	binding	nucleic acid binding
		AAEL011807	0	2.72617	Zinc finger protein 317 OS=Homo sapiens GN=ZNF317 PE=2 SV=2	6e-31	1e-31	nucleic acid binding||binding	binding	nucleic acid binding
		AAEL011825	0	0.267586	Aryl hydrocarbon receptor OS=Homo sapiens GN=AHR PE=1 SV=2	2e-99	0	transcription factor activity||DNA binding||nucleic acid binding||binding	binding	nucleic acid binding
		AAEL011852	0	6.83328	Gag polyprotein OS=Mason-Pfizer monkey virus GN=gag PE=1 SV=3	0.0005	0.0003	nucleic acid binding||binding	binding	nucleic acid binding
		AAEL012082	0	2.33954	Putative uncharacterized protein DDB_G0280065 OS=Dictyostelium discoideum	1e-19	7e-18	DNA binding||nucleic acid binding||binding	binding	nucleic acid binding
		AAEL012263	0	1.87906	Zinc finger protein 729 OS=Homo sapiens GN=ZNF729 PE=2 SV=3	6e-67	4e-65	nucleic acid binding||binding	binding	nucleic acid binding
		AAEL012376	0	0.267048	Ras-interacting protein RIP3 OS=Dictyostelium discoideum GN=ripA PE=1 SV=1	4e-12	3e-13	DNA binding||nucleic acid binding||binding	binding	nucleic acid binding
		AAEL012416	0	2.93501	Maternal protein pumilio OS=Drosophila melanogaster GN=pum PE=1 SV=2	4e-79	2e-79	mRNA 3'\-UTR binding||mRNA binding||RNA binding||nucleic acid binding||binding	binding	nucleic acid binding
		AAEL012428	0	0.288179	Nuclear transcription factor Y subunit alpha OS=Dictyostelium discoideum GN=nfyA	0.014	0.002	transcription factor activity||DNA binding||nucleic acid binding||binding	binding	nucleic acid binding
		AAEL012474	0	1.67405	Motor neuron and pancreas homeobox protein 1 OS=Mus musculus GN=Mnx1 PE=2 SV=1	7e-27	1e-31	transcription factor activity||DNA binding||nucleic acid binding||binding	binding	nucleic acid binding
		AAEL012496	0	0.282128	Ankyrin repeat and BTB/POZ domain-containing protein 2 OS=Mus musculus GN=Abtb2	0	0	DNA binding||nucleic acid binding||binding	binding	nucleic acid binding
		AAEL012810	0	0.187754	Zinc finger protein 25 OS=Homo sapiens GN=ZNF25 PE=2 SV=2	3e-31	5e-33	nucleic acid binding||binding	binding	nucleic acid binding
		AAEL012895	0	0.0910793	Meiotic nuclear division protein 1 homolog OS=Bos taurus GN=MND1 PE=2 SV=1	2e-45	2e-43	DNA binding||nucleic acid binding||binding	binding	nucleic acid binding
		AAEL012899	0	0.0782217	Meiotic nuclear division protein 1 homolog OS=Bos taurus GN=MND1 PE=2 SV=1	5e-47	5e-45	DNA binding||nucleic acid binding||binding	binding	nucleic acid binding
		AAEL012919	0	2.67556	Small nuclear ribonucleoprotein Sm D3 OS=Drosophila melanogaster GN=SmD3 PE=1	9e-32	4e-32	nucleic acid binding||binding	binding	nucleic acid binding
		AAEL013044	0	0.195127	Zinc finger protein 25 OS=Homo sapiens GN=ZNF25 PE=2 SV=2	3e-31	7e-33	nucleic acid binding||binding	binding	nucleic acid binding
		AAEL013110	0	0.102192	Acidic repeat-containing protein OS=Homo sapiens GN=ACRC PE=2 SV=1	7e-32	2e-40	DNA binding||nucleic acid binding||binding	binding	nucleic acid binding
		AAEL013154	0	0.830172	Zinc finger protein weckle OS=Drosophila melanogaster GN=wek PE=1 SV=1	2e-44	3e-75	transcription factor activity||DNA binding||nucleic acid binding||binding	binding	nucleic acid binding
		AAEL013168	0	6.52257	LIM/homeobox protein Awh OS=Drosophila melanogaster GN=Awh PE=1 SV=1	1e-110	0	transcription factor activity||DNA binding||nucleic acid binding||binding	binding	nucleic acid binding
		AAEL013259	0	1.33067	Transcriptional regulator ATRX homolog OS=Caenorhabditis elegans GN=xnp-1 PE=1	2e-09	7e-11	DNA binding||nucleic acid binding||binding	binding	nucleic acid binding
		AAEL013315	0	0.305363	DNA topoisomerase 1 OS=Dictyostelium discoideum GN=top1 PE=3 SV=1	2e-06	1e-06	DNA topoisomerase type I activity||DNA topoisomerase activity||DNA binding||nucleic acid binding||binding	binding	nucleic acid binding
		AAEL013504	0	0.494008	T-box transcription factor TBX6 OS=Xenopus tropicalis GN=tbx6 PE=2 SV=1	5e-66	0	transcription factor activity||DNA binding||nucleic acid binding||binding	binding	nucleic acid binding
		AAEL013544	0	0.48208	Zinc finger protein 629 OS=Mus musculus GN=Znf629 PE=2 SV=2	2e-26	8e-79	nucleic acid binding||binding	binding	nucleic acid binding
		AAEL013582	0	0.396545	Structural polyprotein OS=Ross river virus (strain NB5092) PE=3 SV=1	0.23	0.002	DNA binding||nucleic acid binding||binding	binding	nucleic acid binding
		AAEL013594	0	0.436688	Zinc finger protein 710 OS=Mus musculus GN=Znf710 PE=2 SV=1	5e-28	3e-29	nucleic acid binding||binding	binding	nucleic acid binding
		AAEL013651	0	0.757134	Zinc finger protein 784 OS=Homo sapiens GN=ZNF784 PE=2 SV=1	3e-23	3e-51	nucleic acid binding||binding	binding	nucleic acid binding
		AAEL013659	0	8.93708	Protein ovarian tumor locus OS=Drosophila melanogaster GN=otu PE=2 SV=2	6e-46	3e-46	nucleic acid binding||binding	binding	nucleic acid binding
		AAEL013721	0	0.23082	Probable RISC-loading complex subunit BRAFLDRAFT_242885 OS=Branchiostoma	7e-16	7e-24	double\-stranded RNA binding||RNA binding||nucleic acid binding||binding	binding	nucleic acid binding
		AAEL013733	0	1.14068	Protein distal antenna OS=Aedes aegypti GN=dan PE=3 SV=2	0	1e-92	DNA binding||nucleic acid binding||binding	binding	nucleic acid binding
		AAEL013763	0	0.623365	LIM/homeobox protein Awh OS=Drosophila melanogaster GN=Awh PE=1 SV=1	1e-90	5e-91	transcription factor activity||DNA binding||nucleic acid binding||binding	binding	nucleic acid binding
		AAEL013765	0	0.207829	LIM/homeobox protein Awh OS=Drosophila melanogaster GN=Awh PE=1 SV=1	3e-64	2e-64	transcription factor activity||DNA binding||nucleic acid binding||binding	binding	nucleic acid binding
		AAEL013813	0	1.78115	S-adenosyl-L-methionine-dependent methyltransferase ftsjd2 OS=Danio rerio	2e-89	0	nucleic acid binding||binding	binding	nucleic acid binding
		AAEL013830	0	1.8866	Broad-complex core protein isoform 6 OS=Drosophila melanogaster GN=br PE=1 SV=2	1e-14	4e-60	transcription factor activity||DNA binding||nucleic acid binding||binding	binding	nucleic acid binding
		AAEL013839	0	3.43108	Protein SHORT-ROOT OS=Arabidopsis thaliana GN=SHR PE=1 SV=1	0.015	0.008	transcription factor activity||DNA binding||nucleic acid binding||binding	binding	nucleic acid binding
		AAEL013914	0	3.90811	High mobility group protein 20A OS=Homo sapiens GN=HMG20A PE=1 SV=1	6e-50	4e-50	DNA binding||nucleic acid binding||binding	binding	nucleic acid binding
		AAEL013940	0	1.36432	Chromatin assembly factor 1 subunit B OS=Homo sapiens GN=CHAF1B PE=1 SV=1	1e-108	0	DNA binding||nucleic acid binding||binding	binding	nucleic acid binding
		AAEL013957	0	0.730193	Mortality factor 4-like protein 2 OS=Pongo abelii GN=MORF4L2 PE=2 SV=1	0.37	0.092	DNA binding||nucleic acid binding||binding	binding	nucleic acid binding
		AAEL014032	0	0.368374	Homeotic protein ultrabithorax (Fragment) OS=Drosophila funebris GN=Ubx PE=3	2e-61	5e-60	DNA binding||nucleic acid binding||binding	binding	nucleic acid binding
		AAEL014090	0	0.733512	Zinc finger protein 91 OS=Homo sapiens GN=ZNF91 PE=2 SV=1	8e-17	8e-19	nucleic acid binding||binding	binding	nucleic acid binding
		AAEL014254	0	5.77448	Zinc finger protein 77 OS=Homo sapiens GN=ZNF77 PE=2 SV=2	1e-43	6e-53	nucleic acid binding||binding	binding	nucleic acid binding
		AAEL014284	0	0.135694	Fork head domain-containing protein FD3 OS=Drosophila melanogaster GN=fd59A PE=2	2e-69	1e-69	transcription factor activity||DNA binding||nucleic acid binding||binding	binding	nucleic acid binding
		AAEL014293	0	0.736629	Serine/arginine repetitive matrix protein 1 OS=Mus musculus GN=Srrm1 PE=1 SV=1	0.08	0.041	DNA binding||nucleic acid binding||binding	binding	nucleic acid binding
		AAEL014399	0	0.375424	Zinc finger protein 652 OS=Homo sapiens GN=ZNF652 PE=1 SV=3	2e-24	1e-30	nucleic acid binding||binding	binding	nucleic acid binding
		AAEL014487	0	0.65821	Ras association domain-containing protein 8 OS=Homo sapiens GN=RASSF8 PE=1 SV=2	2e-17	0	transcription factor activity||DNA binding||nucleic acid binding||binding	binding	nucleic acid binding
		AAEL014524	0	2.50983	DNA replication licensing factor MCM4 OS=Drosophila melanogaster GN=dpa PE=1	0	0	DNA binding||nucleic acid binding||binding	binding	nucleic acid binding
		AAEL014538	0	0.973692	Actin cytoskeleton-regulatory complex protein pan1 OS=Emericella nidulans	4e-13	1e-14	DNA binding||nucleic acid binding||binding	binding	nucleic acid binding
		AAEL014696	0	0.908649	NF-kappa-B-activating protein OS=Mus musculus GN=Nkap PE=1 SV=1	0.0005	4e-05	DNA binding||nucleic acid binding||binding	binding	nucleic acid binding
		AAEL014856	0	2.34411	DNA mismatch repair protein spellchecker 1 OS=Drosophila melanogaster GN=spel1	1e-144	0	mismatched DNA binding||double\-stranded DNA binding||structure\-specific DNA binding||DNA binding||nucleic acid binding||binding	binding	nucleic acid binding
		AAEL014881	0	1.3609	Zinc finger protein 845 OS=Homo sapiens GN=ZNF845 PE=2 SV=2	8e-29	6e-30	nucleic acid binding||binding	binding	nucleic acid binding
		AAEL014882	0	0.36228	Zinc finger protein 710 OS=Mus musculus GN=Znf710 PE=2 SV=1	3e-28	4e-30	nucleic acid binding||binding	binding	nucleic acid binding
		AAEL014964	0	0.243264	La-related protein 6 OS=Homo sapiens GN=LARP6 PE=1 SV=1	2e-36	2e-35	RNA binding||nucleic acid binding||binding	binding	nucleic acid binding
		AAEL015080	0	0.9819	CDC45-related protein OS=Xenopus laevis GN=cdc45l PE=2 SV=1	1e-131	0	DNA binding||nucleic acid binding||binding	binding	nucleic acid binding
		AAEL015115	0	0.126307	Zinc finger protein 2 homolog OS=Homo sapiens GN=ZFP2 PE=2 SV=1	2e-25	2e-26	nucleic acid binding||binding	binding	nucleic acid binding
		AAEL015234	0	0.364658	Dorsal root ganglia homeobox protein OS=Mus musculus GN=Drgx PE=1 SV=1	8e-21	7e-31	transcription factor activity||DNA binding||nucleic acid binding||binding	binding	nucleic acid binding
		AAEL015495	0	0.649512	Zinc finger protein rotund OS=Drosophila melanogaster GN=rn PE=1 SV=2	1e-151	0	transcription factor activity||DNA binding||nucleic acid binding||binding	binding	nucleic acid binding
		AAEL015599	0	1.17271	Putative uncharacterized protein DDB_G0291608 OS=Dictyostelium discoideum	3e-07	5e-06	DNA binding||nucleic acid binding||binding	binding	nucleic acid binding
		AAEL015674	0	0.210553	Histone H2B OS=Anopheles gambiae GN=AGAP012199 PE=2 SV=5	3e-60	1e-58	DNA binding||nucleic acid binding||binding	binding	nucleic acid binding
		AAEL015675	0	0.210553	Histone H2B OS=Anopheles gambiae GN=AGAP012199 PE=2 SV=5	3e-60	1e-58	DNA binding||nucleic acid binding||binding	binding	nucleic acid binding
		AAEL015676	0	0.210553	Histone H2B OS=Anopheles gambiae GN=AGAP012199 PE=2 SV=5	3e-60	1e-58	DNA binding||nucleic acid binding||binding	binding	nucleic acid binding
		AAEL015677	0	0.210553	Histone H2B OS=Anopheles gambiae GN=AGAP012199 PE=2 SV=5	3e-60	1e-58	DNA binding||nucleic acid binding||binding	binding	nucleic acid binding
		AAEL015678	0	4.74894	Histone H2B OS=Anopheles gambiae GN=AGAP012199 PE=2 SV=5	3e-60	1e-58	DNA binding||nucleic acid binding||binding	binding	nucleic acid binding
		AAEL015679	0	4.74894	Histone H2B OS=Anopheles gambiae GN=AGAP012199 PE=2 SV=5	3e-60	1e-58	DNA binding||nucleic acid binding||binding	binding	nucleic acid binding
		AAEL015680	0	4.74894	Histone H2B OS=Anopheles gambiae GN=AGAP012199 PE=2 SV=5	3e-60	1e-58	DNA binding||nucleic acid binding||binding	binding	nucleic acid binding
		AAEL015681	0	4.74894	Histone H2B OS=Anopheles gambiae GN=AGAP012199 PE=2 SV=5	3e-60	1e-58	DNA binding||nucleic acid binding||binding	binding	nucleic acid binding
		AAEL015682	0	46.4759	Histone H2B OS=Anopheles gambiae GN=AGAP012199 PE=2 SV=5	5e-56	1e-54	DNA binding||nucleic acid binding||binding	binding	nucleic acid binding
		AAEL017055	0	0.258467	ATP synthase gamma chain OS=Nitratiruptor sp. (strain SB155-2) GN=atpG PE=3 SV=1	0.13	0.002	DNA binding||nucleic acid binding||binding	binding	nucleic acid binding
		AAEL017080	0	0.0225786	PR domain zinc finger protein 15 OS=Homo sapiens GN=PRDM15 PE=2 SV=4	8e-14	4e-18	DNA binding||nucleic acid binding||binding	binding	nucleic acid binding
		AAEL017110	0	1.04027	Ubiquitin carboxyl-terminal hydrolase 36 OS=Drosophila mojavensis GN=Usp36 PE=3	0.0008	0.0002	DNA binding||nucleic acid binding||binding	binding	nucleic acid binding
		AAEL017168	0	2.28401	Fox-1 homolog A OS=Danio rerio GN=fox1 PE=2 SV=1	3e-40	3e-51	nucleic acid binding||binding	binding	nucleic acid binding
		AAEL017229	0	0.1292	Transcription factor hamlet OS=Drosophila melanogaster GN=ham PE=2 SV=1	1e-161	0	transcription factor activity||DNA binding||nucleic acid binding||binding	binding	nucleic acid binding
		AAEL017444	0	1.53561	RNA-binding protein rnp-1 OS=Caenorhabditis elegans GN=rnp-1 PE=1 SV=1	0.02	0.008	nucleic acid binding||binding	binding	nucleic acid binding
		AAEL000134	0	0.201062	RUN domain-containing protein 1 OS=Homo sapiens GN=RUNDC1 PE=1 SV=2	1e-49	3e-06	GTPase activator activity||GTPase regulator activity||nucleoside\-triphosphatase regulator activity||enzyme regulator activity	enzyme regulator activity	nucleoside\-triphosphatase regulator activity
		AAEL000161	0	0.831808	Small G protein signaling modulator 2 OS=Mus musculus GN=Sgsm2 PE=2 SV=2	0	0	Rab GTPase activator activity||Ras GTPase activator activity||small GTPase regulator activity||GTPase regulator activity||nucleoside\-triphosphatase regulator activity||enzyme regulator activity	enzyme regulator activity	nucleoside\-triphosphatase regulator activity
		AAEL000509	0	5.48682	Rho GTPase-activating protein 19 OS=Homo sapiens GN=ARHGAP19 PE=1 SV=1	2e-44	0	GTPase activator activity||GTPase regulator activity||nucleoside\-triphosphatase regulator activity||enzyme regulator activity	enzyme regulator activity	nucleoside\-triphosphatase regulator activity
		AAEL002281	0	0.443487	Rho GTPase-activating protein gacR OS=Dictyostelium discoideum GN=gacR PE=3 SV=1	2e-05	1e-05	Rac GTPase activator activity||Rho GTPase activator activity||Ras GTPase activator activity||small GTPase regulator activity||GTPase regulator activity||nucleoside\-triphosphatase regulator activity||enzyme regulator activity	enzyme regulator activity	nucleoside\-triphosphatase regulator activity
		AAEL002553	0	2.58525	Cytokine-dependent hematopoietic cell linker OS=Homo sapiens GN=CLNK PE=2 SV=2	0.079	2e-23	Rho guanyl\-nucleotide exchange factor activity||Ras guanyl\-nucleotide exchange factor activity||guanyl\-nucleotide exchange factor activity||GTPase regulator activity||nucleoside\-triphosphatase regulator activity||enzyme regulator activity	enzyme regulator activity	nucleoside\-triphosphatase regulator activity
		AAEL002711	0	3.79208	TBC1 domain family member 16 OS=Homo sapiens GN=TBC1D16 PE=2 SV=1	1e-157	0	GTPase activator activity||GTPase regulator activity||nucleoside\-triphosphatase regulator activity||enzyme regulator activity	enzyme regulator activity	nucleoside\-triphosphatase regulator activity
		AAEL003121	0	0.361452	X-linked retinitis pigmentosa GTPase regulator OS=Homo sapiens GN=RPGR PE=1 SV=2	4e-18	2e-41	guanyl\-nucleotide exchange factor activity||GTPase regulator activity||nucleoside\-triphosphatase regulator activity||enzyme regulator activity	enzyme regulator activity	nucleoside\-triphosphatase regulator activity
		AAEL003292	0	1.43432	SLIT-ROBO Rho GTPase-activating protein 1 OS=Homo sapiens GN=SRGAP1 PE=1 SV=1	1e-153	0	GTPase activator activity||GTPase regulator activity||nucleoside\-triphosphatase regulator activity||enzyme regulator activity	enzyme regulator activity	nucleoside\-triphosphatase regulator activity
		AAEL004066	0	1.00431	Pleckstrin homology domain-containing family G member 4B OS=Homo sapiens	1e-108	0	guanyl\-nucleotide exchange factor activity||GTPase regulator activity||nucleoside\-triphosphatase regulator activity||enzyme regulator activity	enzyme regulator activity	nucleoside\-triphosphatase regulator activity
		AAEL004476	0	4.48036	G-protein-signaling modulator 2 OS=Mus musculus GN=Gpsm2 PE=1 SV=1	0.22	7e-13	Ras GTPase activator activity||small GTPase regulator activity||GTPase regulator activity||nucleoside\-triphosphatase regulator activity||enzyme regulator activity	enzyme regulator activity	nucleoside\-triphosphatase regulator activity
		AAEL007529	0	0.0541883	Nucleoprotein OS=Bovine ephemeral fever virus GN=N PE=3 SV=1	5e-29	0.003	Rac GTPase activator activity||Rho GTPase activator activity||Ras GTPase activator activity||small GTPase regulator activity||GTPase regulator activity||nucleoside\-triphosphatase regulator activity||enzyme regulator activity	enzyme regulator activity	nucleoside\-triphosphatase regulator activity
		AAEL007559	0	0.209562	Ras-GEF domain-containing family member 1B-A OS=Danio rerio GN=rasgef1ba PE=2	5e-38	4e-91	guanyl\-nucleotide exchange factor activity||GTPase regulator activity||nucleoside\-triphosphatase regulator activity||enzyme regulator activity	enzyme regulator activity	nucleoside\-triphosphatase regulator activity
		AAEL007879	0	6.11085	5-aminolevulinate synthase, mitochondrial OS=Kluyveromyces lactis GN=HEM1 PE=3	2.2	0.043	small GTPase regulator activity||GTPase regulator activity||nucleoside\-triphosphatase regulator activity||enzyme regulator activity	enzyme regulator activity	nucleoside\-triphosphatase regulator activity
		AAEL009263	0	13.2556	Inhibitory regulator protein IRA1 OS=Saccharomyces cerevisiae GN=IRA1 PE=1 SV=2	0.003	0.002	GTPase activator activity||GTPase regulator activity||nucleoside\-triphosphatase regulator activity||enzyme regulator activity	enzyme regulator activity	nucleoside\-triphosphatase regulator activity
		AAEL009688	0	2.96072	Rho GTPase-activating protein 10 OS=Homo sapiens GN=ARHGAP10 PE=1 SV=1	1e-10	1e-16	Rho GTPase activator activity||Ras GTPase activator activity||small GTPase regulator activity||GTPase regulator activity||nucleoside\-triphosphatase regulator activity||enzyme regulator activity	enzyme regulator activity	nucleoside\-triphosphatase regulator activity
		AAEL009718	0	1.36391	Dedicator of cytokinesis protein 7 OS=Mus musculus GN=Dock7 PE=1 SV=3	0	0	guanyl\-nucleotide exchange factor activity||GTPase regulator activity||nucleoside\-triphosphatase regulator activity||enzyme regulator activity	enzyme regulator activity	nucleoside\-triphosphatase regulator activity
		AAEL010283	0	0.773227	Rab3 GTPase-activating protein catalytic subunit OS=Mus musculus GN=Rab3gap1	1e-76	5e-77	GTPase activator activity||GTPase regulator activity||nucleoside\-triphosphatase regulator activity||enzyme regulator activity	enzyme regulator activity	nucleoside\-triphosphatase regulator activity
		AAEL010285	0	0.522686	Rab3 GTPase-activating protein catalytic subunit OS=Mus musculus GN=Rab3gap1	2e-76	9e-77	GTPase activator activity||GTPase regulator activity||nucleoside\-triphosphatase regulator activity||enzyme regulator activity	enzyme regulator activity	nucleoside\-triphosphatase regulator activity
		AAEL011257	0	1.97679	Dedicator of cytokinesis protein 3 OS=Mus musculus GN=Dock3 PE=1 SV=1	8e-25	6e-58	guanyl\-nucleotide exchange factor activity||GTPase regulator activity||nucleoside\-triphosphatase regulator activity||enzyme regulator activity	enzyme regulator activity	nucleoside\-triphosphatase regulator activity
		AAEL011695	0	0.819577	SH3 domain-containing guanine exchange factor OS=Homo sapiens GN=SGEF PE=1 SV=3	1e-34	8e-83	Rho guanyl\-nucleotide exchange factor activity||Ras guanyl\-nucleotide exchange factor activity||guanyl\-nucleotide exchange factor activity||GTPase regulator activity||nucleoside\-triphosphatase regulator activity||enzyme regulator activity	enzyme regulator activity	nucleoside\-triphosphatase regulator activity
		AAEL014425	0	0.198753	TBC1 domain family member 30 OS=Xenopus tropicalis GN=tbc1d30 PE=2 SV=1	2e-87	0	Rab GTPase activator activity||Ras GTPase activator activity||small GTPase regulator activity||GTPase regulator activity||nucleoside\-triphosphatase regulator activity||enzyme regulator activity	enzyme regulator activity	nucleoside\-triphosphatase regulator activity
		AAEL014521	0	0.114175	Ankyrin repeat, PH and SEC7 domain containing protein secG OS=Dictyostelium	2e-39	8e-40	ARF guanyl\-nucleotide exchange factor activity||guanyl\-nucleotide exchange factor activity||GTPase regulator activity||nucleoside\-triphosphatase regulator activity||enzyme regulator activity	enzyme regulator activity	nucleoside\-triphosphatase regulator activity
		AAEL000489	0	0.403306	Serine/threonine-protein kinase PAK 1 OS=Rattus norvegicus GN=Pak1 PE=1 SV=3	1e-113	0	nucleotide binding||binding	binding	nucleotide binding
		AAEL000884	0	4.3902	Eukaryotic translation initiation factor 2-alpha kinase 2 OS=Schizosaccharomyces	4e-35	3e-48	ATP binding||adenyl ribonucleotide binding||purine ribonucleotide binding||purine nucleotide binding||nucleotide binding||binding	binding	nucleotide binding
		AAEL001559	0	2.89358	Serine/threonine-protein kinase mos OS=Gallus gallus GN=MOS PE=3 SV=1	5e-24	7e-49	nucleotide binding||binding	binding	nucleotide binding
		AAEL001643	0	2.37904	Coiled-coil domain-containing protein C6orf97 OS=Homo sapiens GN=C6orf97 PE=2	2e-22	1e-08	ADP binding||adenyl ribonucleotide binding||purine ribonucleotide binding||purine nucleotide binding||nucleotide binding||binding	binding	nucleotide binding
		AAEL001976	0	0.318122	cAMP-dependent protein kinase catalytic subunit beta OS=Homo sapiens GN=PRKACB	1e-115	0	nucleotide binding||binding	binding	nucleotide binding
		AAEL002671	0	0.057401	GTP-binding protein A OS=Dictyostelium discoideum GN=gtpA PE=3 SV=1	0.0002	4e-15	ATP binding||adenyl ribonucleotide binding||purine ribonucleotide binding||purine nucleotide binding||nucleotide binding||binding	binding	nucleotide binding
		AAEL003950	0	10.1118	Chromatin-remodeling complex ATPase chain Iswi OS=Drosophila melanogaster	1e-136	0	ATP binding||adenyl ribonucleotide binding||purine ribonucleotide binding||purine nucleotide binding||nucleotide binding||binding	binding	nucleotide binding
		AAEL004331	0	0.345529	ATP-binding cassette sub-family A member 5 OS=Mus musculus GN=Abca5 PE=1 SV=2	0	0	nucleotide binding||binding	binding	nucleotide binding
		AAEL004491	0	0.158441	Protein sickie OS=Drosophila melanogaster GN=sick PE=1 SV=3	0	0	nucleotide binding||binding	binding	nucleotide binding
		AAEL004740	0	4.29559	GTP-binding protein 10 homolog OS=Drosophila melanogaster GN=CG10628 PE=2 SV=2	1e-135	0	GTP binding||guanyl ribonucleotide binding||purine ribonucleotide binding||purine nucleotide binding||nucleotide binding||binding	binding	nucleotide binding
		AAEL004939	0	0.0727007	Tubulin beta-2 chain OS=Drosophila erecta GN=betaTub85D PE=3 SV=1	1e-155	0	GTP binding||guanyl ribonucleotide binding||purine ribonucleotide binding||purine nucleotide binding||nucleotide binding||binding	binding	nucleotide binding
		AAEL005514	0	7.71409	Rho-associated protein kinase 1 OS=Rattus norvegicus GN=Rock1 PE=1 SV=1	0.002	3e-14	ATP binding||adenyl ribonucleotide binding||purine ribonucleotide binding||purine nucleotide binding||nucleotide binding||binding	binding	nucleotide binding
		AAEL005905	0	1.33749	DALR anticodon-binding domain-containing protein 3 OS=Danio rerio GN=dalrd3 PE=2	2e-25	5e-32	ATP binding||adenyl ribonucleotide binding||purine ribonucleotide binding||purine nucleotide binding||nucleotide binding||binding	binding	nucleotide binding
		AAEL006179	0	0.373309	Tubulin alpha chain OS=Xenopus laevis GN=tuba PE=2 SV=2	1e-175	0	GTP binding||guanyl ribonucleotide binding||purine ribonucleotide binding||purine nucleotide binding||nucleotide binding||binding	binding	nucleotide binding
		AAEL006344	0	23.8149	Sulfotransferase 1A3/1A4 OS=Homo sapiens GN=SULT1A3 PE=1 SV=1	6e-28	7e-47	nucleotide binding||binding	binding	nucleotide binding
		AAEL006561	0	0.107019	Probable serine/threonine-protein kinase mps1 OS=Dictyostelium discoideum	9e-06	1e-06	nucleotide binding||binding	binding	nucleotide binding
		AAEL007393	0	0.872179	Transmembrane protein 145 OS=Mus musculus GN=Tmem145 PE=1 SV=1	4e-61	2e-61	ATP binding||adenyl ribonucleotide binding||purine ribonucleotide binding||purine nucleotide binding||nucleotide binding||binding	binding	nucleotide binding
		AAEL007436	0	0.977045	Trinucleotide repeat-containing gene 6B protein OS=Homo sapiens GN=TNRC6B PE=1	1e-66	0	nucleotide binding||binding	binding	nucleotide binding
		AAEL007757	0	1.99233	tRNA modification GTPase mnmE OS=Prochlorococcus marinus (strain MIT 9312)	0.002	0.012	ATP binding||adenyl ribonucleotide binding||purine ribonucleotide binding||purine nucleotide binding||nucleotide binding||binding	binding	nucleotide binding
		AAEL007766	0	2.54958	GTP-binding protein Di-Ras2 OS=Pongo abelii GN=DIRAS2 PE=2 SV=1	1e-23	2e-67	GTP binding||guanyl ribonucleotide binding||purine ribonucleotide binding||purine nucleotide binding||nucleotide binding||binding	binding	nucleotide binding
		AAEL008092	0	1.7086	Myosin-IXb OS=Rattus norvegicus GN=Myo9b PE=1 SV=1	0.003	0.001	nucleotide binding||binding	binding	nucleotide binding
		AAEL009686	0	5.42961	Protein Red OS=Pongo abelii GN=IK PE=2 SV=1	1e-126	0	ATP binding||adenyl ribonucleotide binding||purine ribonucleotide binding||purine nucleotide binding||nucleotide binding||binding	binding	nucleotide binding
		AAEL009974	0	0.295376	Ras-related protein Rab-8A OS=Macaca fascicularis GN=RAB8A PE=2 SV=1	1e-53	0	ATP binding||adenyl ribonucleotide binding||purine ribonucleotide binding||purine nucleotide binding||nucleotide binding||binding	binding	nucleotide binding
		AAEL009977	0	0.703621	Myosin-3 OS=Mus musculus GN=Myh3 PE=2 SV=2	2e-07	1e-08	nucleotide binding||binding	binding	nucleotide binding
		AAEL011418	0	0.291879	Copia protein OS=Drosophila melanogaster GN=GIP PE=1 SV=3	0.015	0.008	nucleotide binding||binding	binding	nucleotide binding
		AAEL011524	0	0.213959	Intron-binding protein aquarius OS=Mus musculus GN=Aqr PE=2 SV=2	1e-78	0	ATP binding||adenyl ribonucleotide binding||purine ribonucleotide binding||purine nucleotide binding||nucleotide binding||binding	binding	nucleotide binding
		AAEL011653	0	2.14844	Thyroid receptor-interacting protein 13 OS=Homo sapiens GN=TRIP13 PE=1 SV=2	8e-91	7e-94	nucleotide binding||binding	binding	nucleotide binding
		AAEL012922	0	0.541006	Myosin-Ib OS=Mus musculus GN=Myo1b PE=2 SV=2	1e-169	0	nucleotide binding||binding	binding	nucleotide binding
		AAEL013027	0	24.2989	Vitelline membrane protein 15a-2 OS=Aedes aegypti PE=1 SV=2	5e-26	2e-06	nucleotide binding||binding	binding	nucleotide binding
[truncated: 962 more rows]
